# Supplementary material for: Chiral phosphoric acid catalyzed enantioselective annulation of acyclic enecarbamates to in situ-generated ortho-quinone methides
Source: Royal Society of Chemistry journal article supplement (doi:10.1039/c7ob01766a), 2017-01-01

## SUPPORTING INFORMATION

### **Chiral Phosphoric Acid Catalyzed Enantioselective Annulation of Acyclic Enecarbamates to In Situ-Generated *ortho*-Quinone Methides**

Chandan Gharui, Shreya Singh and Subhas Chandra Pan\*

Department of Chemistry, Indian Institute of Technology Guwahati, North Guwahati,

Assam, 781039

#### Table of Contents

|                                                                                                                                                                                                    |           |
|----------------------------------------------------------------------------------------------------------------------------------------------------------------------------------------------------|-----------|
| 1. General information                                                                                                                                                                             | S2        |
| 2. General procedure for the synthesis of various <i>o</i> -hydroxybenzyl alcohols ( <b>1</b> )                                                                                                    | S2- S5    |
| 3. Stepwise procedure for the synthesis of various enecarbamates ( <b>2</b> )                                                                                                                      | S5-S13    |
| (A) Preparation of substituted cinnamic acids ( <b>6</b> )                                                                                                                                         |           |
| (B) Preparation of substituted 3-phenyl-acryloyl azides ( <b>7</b> ) from cinnamic acids ( <b>6</b> )                                                                                              |           |
| (C) Preparation of enecarbamates ( <b>2</b> ) from substituted 3-phenyl-acryloyl azides ( <b>7</b> )<br>& characterization data for the enecarbamates ( <b>2</b> )                                 |           |
| 4. References                                                                                                                                                                                      | S13-S14   |
| 5. General procedure for the synthesis of trisubstituted chromans ( <b>3</b> )                                                                                                                     | S14       |
| 6. Solvent and temperature screening                                                                                                                                                               | S15       |
| 7. Possible mechanistic pathway involved in the synthesis of trisubstituted chromans                                                                                                               | S15-S19   |
| 8. Characterization data for the trisubstituted chromans ( <b>3</b> )                                                                                                                              | S19-S35   |
| 9. NMR spectra of enecarbamates ( <b>2</b> ) & trisubstituted chromans ( <b>3</b> )                                                                                                                | S35-S92   |
| 10. HSQC data of product ( <b>3a</b> )                                                                                                                                                             | S92       |
| 11. COSY and 1D NOE spectra for relative stereo chemistry of product ( <b>Table 1, entry 1</b> )<br>( <b>3a /3a'</b> ), product ( <b>Table 1, entry 6</b> ) ( <b>3a</b> ), & product ( <b>3b</b> ) | S93-S99   |
| 12. HPLC chromatogram                                                                                                                                                                              | S100-S124 |
| 13. Determination of absolute stereochemistry for the compound ( <b>3q</b> )                                                                                                                       | S125-S132 |

## 1. General information:

All reagents, chiral catalysts **I**, **IV** and **V** were purchased from Sigma Aldrich and the other chiral catalysts such as **II**, **III** and **VI** were prepared according to the reported procedures.<sup>1,2,3</sup> Solvents were purified according to standard procedures. Reactions were carried out and monitored by TLC analysis. For column chromatography, silica gel (60 – 120 mesh size) were used. <sup>1</sup>H NMR spectra were recorded on 400 MHz and 600 MHz spectrometer. <sup>13</sup>C NMR spectra were recorded on 150 MHz. For <sup>1</sup>H and <sup>13</sup>C, CDCl<sub>3</sub> is used as reference NMR solvent. Chemical shifts and coupling constants were reported in parts per million (ppm) and Hertz (Hz) respectively. Multiplicity was indicated as follows: s (singlet), d (doublet), t (triplet), q (quartet), m (multiplet), dd (doublet of doublet), brs (broad singlet), dt (doublet of triplet). HRMS mass spectra were taken from mass spectrometer using +ESI mode. Enantiomeric ratios were determined by HPLC using stationary phase chiral column through the help of Dionex (Ultimate 3000) instrument.

## 2. General Procedure for the synthesis of various o-hydroxybenzyl alcohols (1):

Various kinds of *o*-hydroxybenzyl alcohols **1** were prepared based on literature procedure.<sup>4,5a</sup>

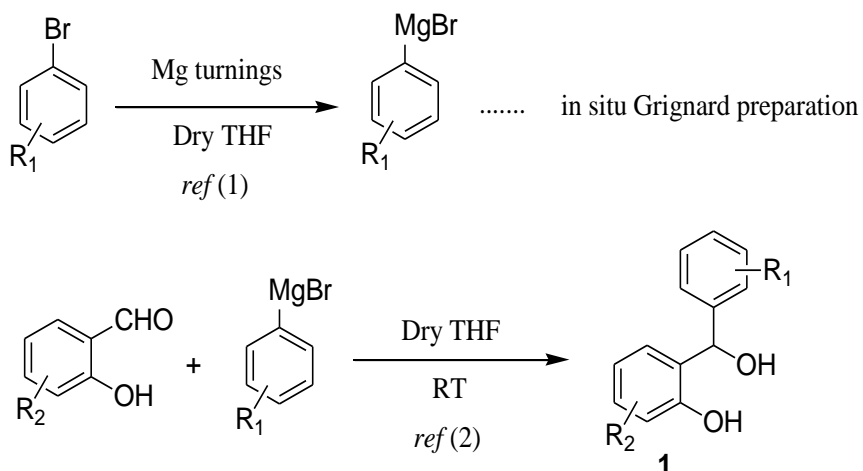

First, a super dried 2-neck round-bottomed flask equipped with a stirbar was taken. It's one neck was closed with rubber septum and the other neck was fitted with a 2-way adapter (one side was linked with a argon balloon and other side was connected with a high vacuum pump). Then argon flash was done for 2-3 times. Thereafter a magnet and magnesium turnings (16 mmol) were charged under the stream of argon. Next, the flask was made vacuum and continued heating using heatgun for about 15 minutes. After heating, the whole flask was cooled under argon

environment. Then 5 to 8 crystal of iodine was added through the septum quickly under the argon flow. Again the flask was made vacuum and argon flash. Thereafter, dry THF (5.3 ml) was added with the help of a dry syringe and the whole set up was placed in ice bath (0°C). Aryl halide (16 mmol) was then added dropwise throughout 30 minutes. Finally, after completion of aryl bromide addition the reaction set up was shifted to room temperature and continued stirring for 3 hours. Reaction mixture was then turned to viscous and gray color, that indicated the formation of the Grignard reagent.

A separate dried 2 neck round-bottomed flask equipped with a stirbar was made vacuum and argon flashed. Then corresponding salicylaldehyde (4 mmol, 1 equiv) and dry THF (4.4 ml) were added. Next, the whole set up was placed in an ice bath and consequently in situ prepared Grignard reagent (2.93 ml, 3M, 2.2 equiv) was added dropwise under argon. Finally the reaction set up was shifted at room temperature and continued stirring for overnight. Progress of the reaction was monitored by TLC analysis. Reaction mixture was quenched by using saturated NH<sub>4</sub>Cl solution (15 ml). Work up was done by using diethyl ether and washed with brine solution. Organic layers were concentrated and purified by column chromatography using (Hexane / EtOAc) as solvent system to afford the corresponding desired o-hydroxybenzyl alcohol **1**.

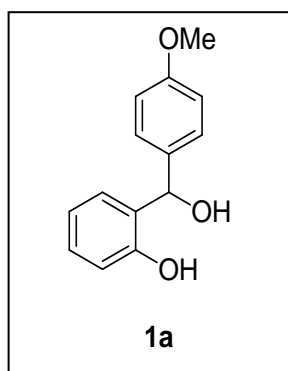

This compound was prepared according to the general procedure **2**. Here, coupling of 2-hydroxy benzaldehyde (488 mg, 4 mmol) with insitu prepared 4-methoxy phenyl magnesium bromide was employed. The crude product was purified by column chromatography using 10% (Hexane / EtOAc) solvent system to get 435 mg (yield: 47%) of the desired compound **1a** as a pale orange sticky solid.

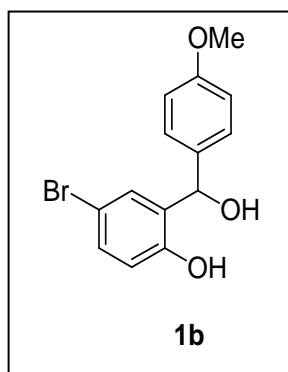

This compound was prepared according to the general procedure **2**. Here, coupling of 5-bromo-2-hydroxy benzaldehyde (804 mg, 4 mmol) with insitu prepared 4-methoxy phenyl magnesium bromide was employed. The crude product was purified by column chromatography using 10% (Hexane / EtOAc) solvent system to get 523 mg (yield: 42%) of the desired compound **1b** as a colorless sticky solid.

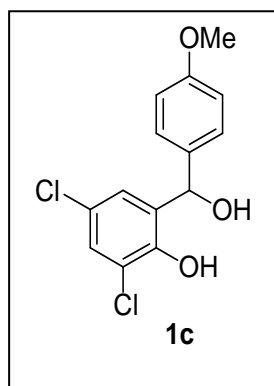

This compound was prepared according to the general procedure **2**. Here, coupling of 3,5-dichloro-2-hydroxy benzaldehyde (764 mg, 4 mmol) with insitu prepared 4-methoxy phenyl magnesium bromide was employed. The crude product was purified by column chromatography using 10% (Hexane / EtOAc) solvent system to get 756 mg (yield: 63%) of the desired compound **1c** as an orange sticky solid.

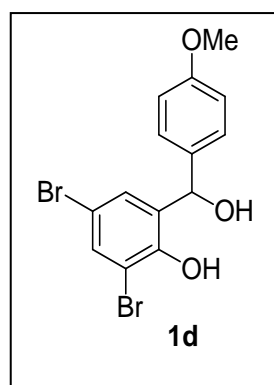

This compound was prepared according to the general procedure **2**. Here, coupling of 3,5-dibromo-2-hydroxy benzaldehyde (1120 mg, 4 mmol) with insitu prepared 4-methoxy phenyl magnesium bromide was employed. The crude product was purified by column chromatography using 10% (Hexane / EtOAc) solvent system to get 1160 mg (yield: 75%) of the desired compound **1d** as a white solid.

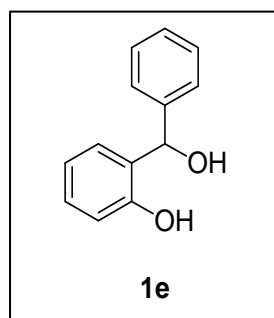

This compound was prepared according to the general procedure **2**. Here, coupling of 2-hydroxy benzaldehyde (488 mg, 4 mmol) with insitu prepared phenyl magnesium bromide was employed. The crude product was purified by column chromatography using 8% (Hexane / EtOAc) solvent system to get 642 mg (yield: 80%) of the desired compound **1e** as a colorless sticky liquid.

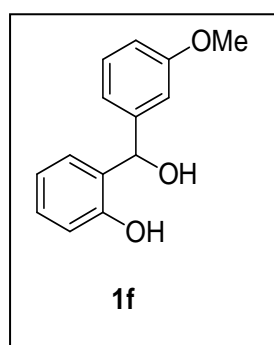

This compound was prepared according to the general procedure **2**. Here, coupling of 2-hydroxy benzaldehyde (488 mg, 4 mmol) with insitu prepared 3-methoxy phenyl magnesium iodide was employed. The crude product was purified by column chromatography using 10% (Hexane/ EtOAc) solvent system to get 150 mg (yield: 16%) of the desired compound **1f** as an orange sticky liquid.

### **Synthesis of 2-(1-hydroxy-3-phenylprop-2-yn-1-yl) phenol:**

2-(1-hydroxy-3-phenylprop-2-yn-1-yl) phenol was prepared based on literature procedure.<sup>5b</sup>

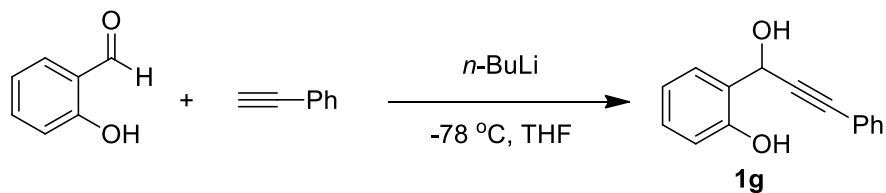

Phenyl acetylene (460 mg, 4.5 mmol) was added in 2.5 ml dry THF. Then the solution was cooled to  $-78\text{ }^{\circ}\text{C}$ . At that temperature *n*-BuLi (1.8 ml, 2.5 M in THF) was added dropwise. Resultant reaction mixture was shifted to  $-40\text{ }^{\circ}\text{C}$  for 4 hours and again thereafter cooled to  $-78\text{ }^{\circ}\text{C}$ . Then 2-hydroxy benzaldehyde (250 mg, 2.05 mmol) was added dropwise to the reaction mixture and continued stirring for 12 hours. After completion of the reaction, reaction mixture was quenched by saturated  $\text{NH}_4\text{Cl}$ . Finally, work up was done by DCM. The crude product was purified by column chromatography using 15% (Hexane/ EtOAc) solvent system to get 279 mg (yield: 61%) of the desired compound **1g** as white solid.

### 3. Stepwise procedure for the synthesis of various enecarbamates (2):

#### (A).Preparation of substituted cinnamic acids (6)

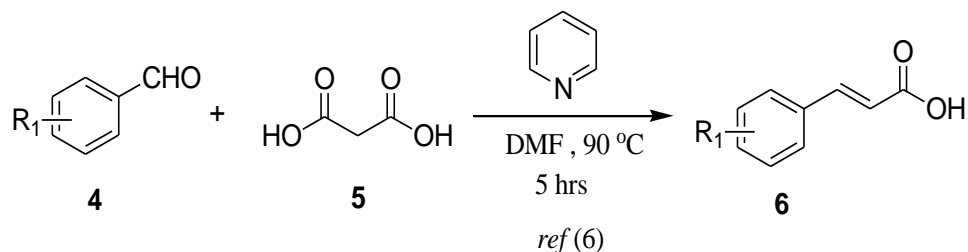

To a solution of the corresponding substituted benzaldehyde **4** (3 mmol) and malonic acid **5** (9 mmol) in DMF (1.8 ml) was added pyridine (3 mmol) and stirred for 5 hrs at  $90^{\circ}\text{C}$ . After adding water (4 ml), the reaction mixture was acidified (pH 1) with concentrated HCl and it was cooled to  $0\text{ }^{\circ}\text{C}$ . Resulting precipitate was filtered and washed with cold water for 2 to 3 times. Finally, crude solid product **6** was dried under vacuum pump for 3-4 hours. Thereafter substituted cinnamic acids (**6b** to **6o**), (Solid, white in color) were used directly without further purification for the preparation of substituted 3-phenyl-acryloyl azides **7**.

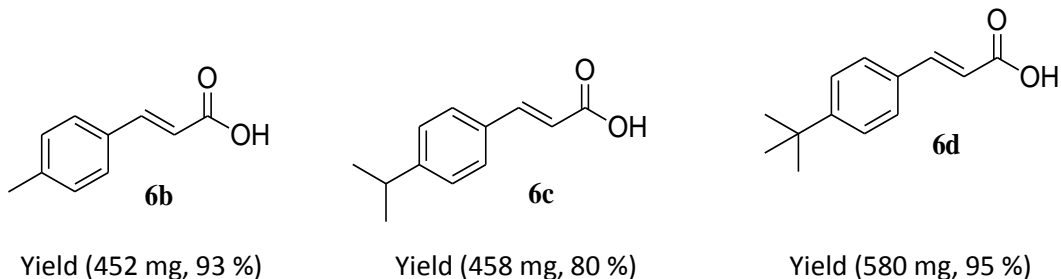

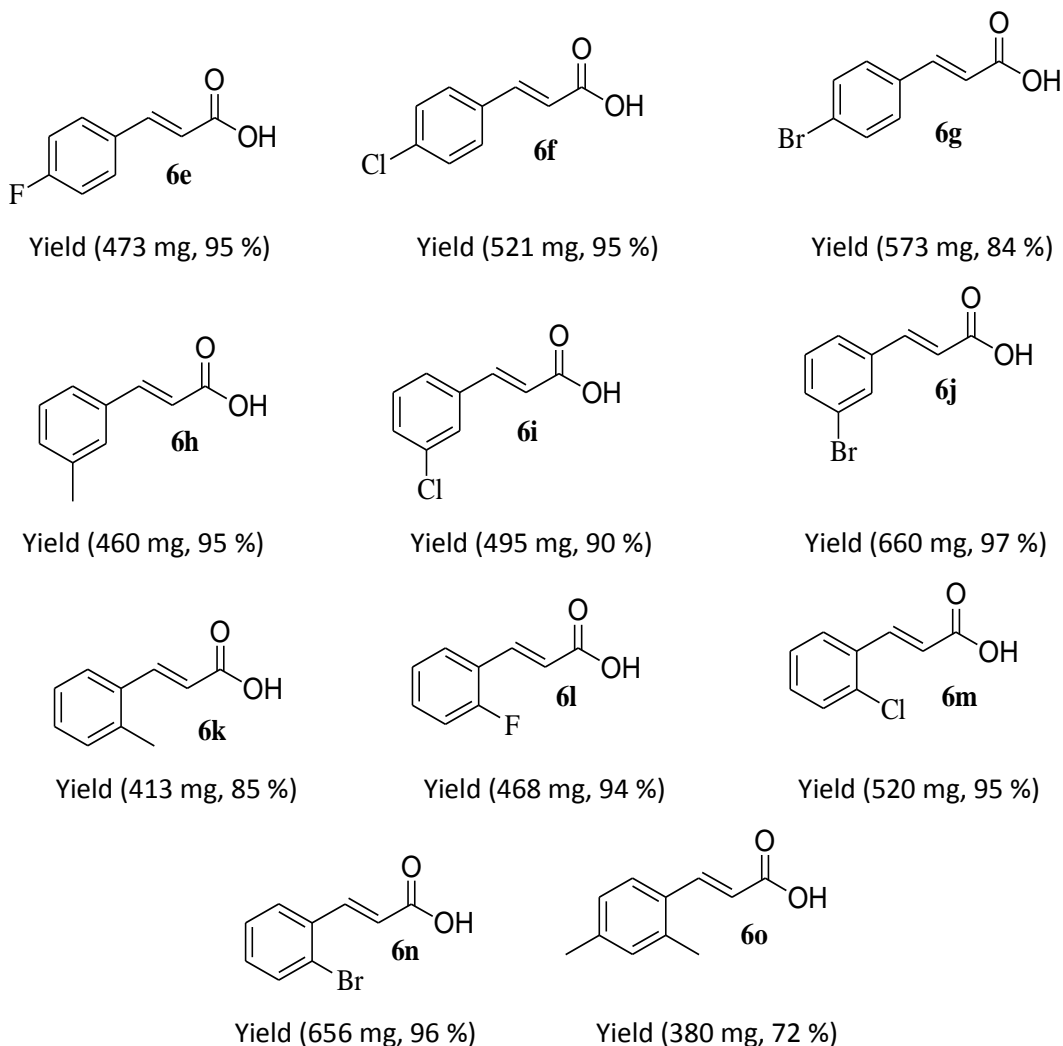

**(B). Preparation of substituted 3-phenyl-acryloyl azides (7) from cinnamic acids (6)**

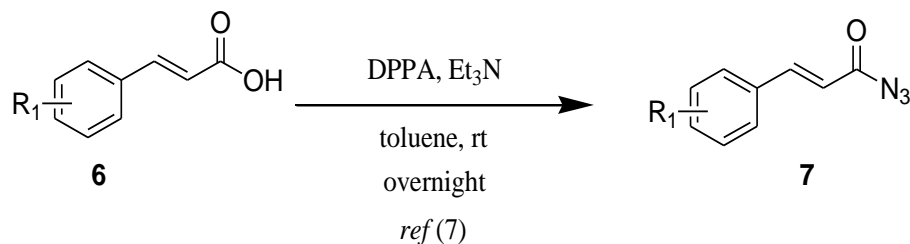

To the solution of corresponding cinnamic acid **6** (2 mmol) in toluene (13.3 ml), was added Et<sub>3</sub>N (10 mmol) and diphenylphosphoryl azide (DPPA, 8 mmol) under argon balloon. Then the reaction mixture was stirred for overnight at room temperature. Progress of the reaction was monitored by TLC. Then work up was done by using DCM solvent and washed with brine solution. Organic layer was dried over Na<sub>2</sub>SO<sub>4</sub> and concentrated in *vacuo*. Finally the crude

acryloyl azides (**7a** to **7o**) were purified by column chromatography using 2% (Hexane / EtOAc). Thereafter substituted 3-phenyl-acryloyl azides (**7a** to **7o**), (Solid, white in color) were used directly for the preparation of various enecarbamates **2** without any characterization.

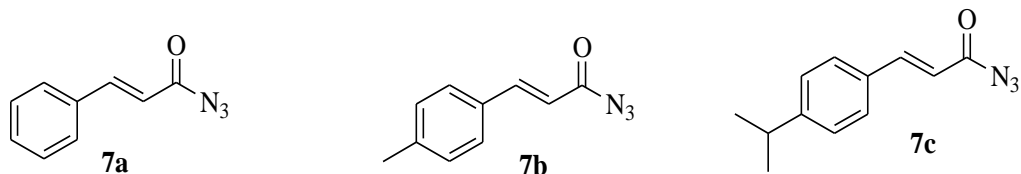

Yield (277 mg, 80 %)

Yield (220 mg, 59 %)

Yield (332 mg, 77 %)

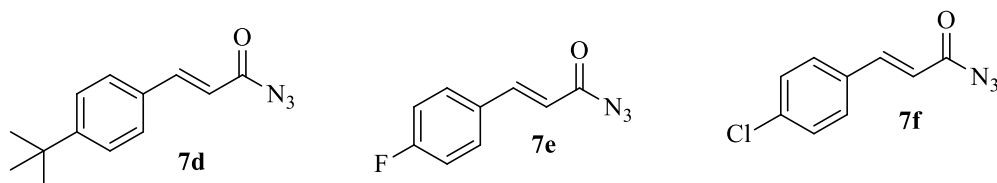

Yield (360 mg, 79 %)

Yield (311 mg, 81 %)

Yield (333 mg, 80 %)

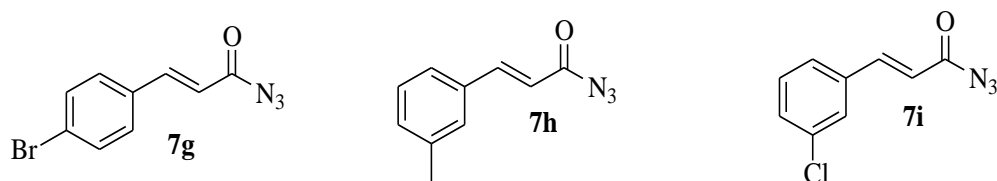

Yield (452 mg, 90 %)

Yield (312 mg, 83 %)

Yield (342 mg, 82 %)

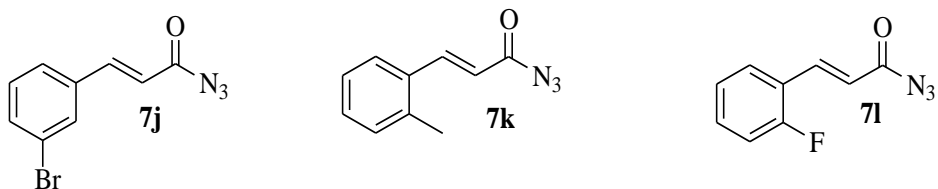

Yield (430 mg, 85 %)

Yield (183 mg, 49 %)

Yield (335 mg, 88 %)

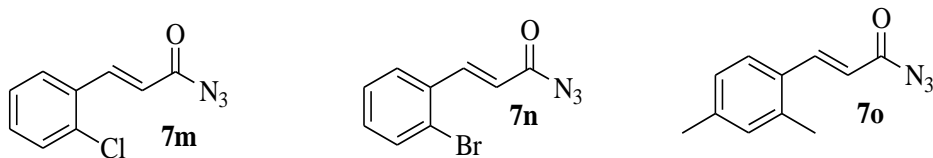

Yield (375 mg, 90 %)

Yield (312 mg, 62 %)

Yield (335 mg, 83 %)

**(C).Preparation of enecarbamates (2) from substituted 3-phenyl-acryloyl azides (7) & characterization data for the enecarbamates (2)**

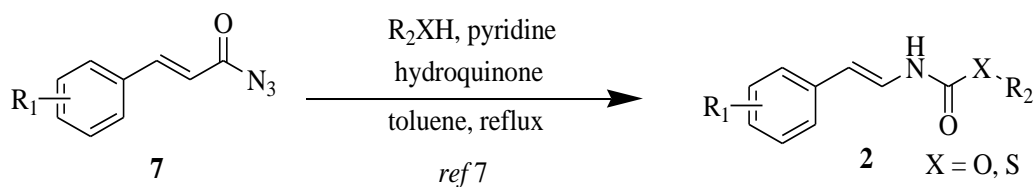

A solution of corresponding acryloyl azide **7** (1 mmol) in toluene (3 ml) was added dropwise to a stirred mixture of hydroquinone (0.05 mmol), pyridine (0.06 mmol) and corresponding alcohol or thiol (1.2 mmol) at 100 °C. The mixture was then stirred for 30 minutes under reflux condition and the toluene was removed by rotary evaporation. Finally the crude product was purified by doing column chromatography using (Hexane / EtOAc) as solvent system to afford the desired enecarbamates **2**.

#### *Benzyl styrylcarbamate (2a)*

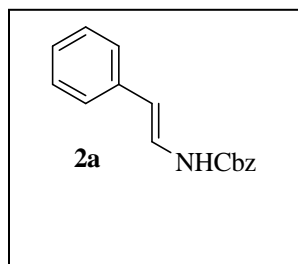

The procedure **3 (C)** was followed for the reaction of **7a** (173 mg, 1 mmol) to enecarbamate **2a**. The crude product was purified by column chromatography using 3% (Hexane / EtOAc) solvent system to get 225 mg (yield: 89%) of the desired compound **2a** as a white solid. <sup>1</sup>H NMR (600 MHz, CDCl<sub>3</sub>): δ 7.39 - 7.36 (m, 5H), 7.29 - 7.28 (m, 5H), 7.17 (d, *J* = 2.8 Hz, 1H), 6.77 (brs, 1H), 5.98 (d, *J* = 14.5 Hz, 1H), 5.20 (s, 2H);

<sup>13</sup>C NMR (100 MHz, CDCl<sub>3</sub>): δ 153.8, 136.4, 136.0, 128.8, 128.8, 128.6, 128.5, 126.5, 125.5, 124.1, 111.2, 67.6.

#### *Benzyl 4-methylstyrylcarbamate (2b)*

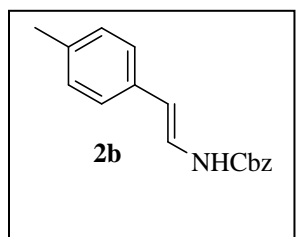

The procedure **3 (C)** was followed for the reaction of **7b** (187 mg, 1 mmol) to enecarbamate **2b**. The crude product was purified by column chromatography using 4% (Hexane / EtOAc) solvent system to get 187 mg (yield: 70%) of the desired compound **2b** as a white solid. <sup>1</sup>H NMR (600 MHz, CDCl<sub>3</sub>): δ 7.38 (d, *J* = 4.2 Hz, 4H), 7.35 (dd, *J* = 8.3, 3.9

Hz, 1H), 7.18 (d, *J* = 7.7 Hz, 3H), 7.09 (d, *J* = 7.9 Hz, 2H), 6.61 (brs, 1H), 5.94 (d, *J* = 14.6 Hz, 1H), 5.19 (s, 2H), 2.32 (s, 3H); <sup>13</sup>C NMR (100 MHz, CDCl<sub>3</sub>): δ 153.8, 136.2, 136.0, 133.5, 129.5, 128.7, 128.5, 128.4, 125.4, 123.3, 111.2, 67.5, 21.2.

#### *Benzyl 4-isopropylstyrylcarbamate (2c)*

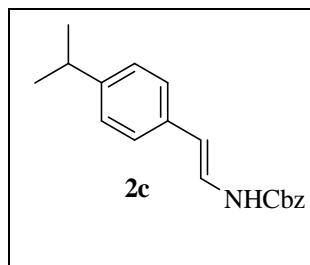

The procedure **3 (C)** was followed for the reaction of **7c** (215 mg, 1 mmol) to enecarbamate **2c**. The crude product was purified by column



chromatography using 3% (Hexane / EtOAc) solvent system to get 248 mg (yield: 84%) of the desired compound **2c** as a white solid.  $^1\text{H NMR}$  (600 MHz,  $\text{CDCl}_3$ ):  $\delta$  7.39 (d,  $J = 4.1$  Hz, 4H), 7.35 (d,  $J = 5.0$  Hz, 2H), 7.23 (d,  $J = 7.2$  Hz, 2H), 7.16 (d,  $J = 8.1$  Hz, 2H), 6.78 (brs, 1H), 5.97 (d,  $J = 14.5$  Hz, 1H), 5.20 (s, 2H), 2.90 – 2.87 (m, 1H), 1.26 (d,  $J = 6.9$  Hz, 6H);  $^{13}\text{C NMR}$  (100 MHz,  $\text{CDCl}_3$ ):  $\delta$  153.9, 147.2, 136.0, 133.9, 128.7, 128.5, 128.3, 126.8, 125.4, 123.4, 111.2, 67.4, 33.8, 24.1.

#### ***Benzyl 4-tert-butylstyrylcarbamate (2d)***

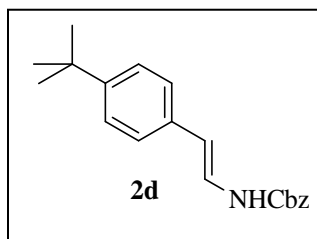

The procedure **3 (C)** was followed for the reaction of **7d** (229 mg, 1 mmol) to enecarbamate **2d**. The crude product was purified by column chromatography using 2.5% (Hexane / EtOAc) solvent system to get 270 mg (yield: 87%) of the desired compound **2d** as a white solid.  $^1\text{H NMR}$  (600 MHz,  $\text{CDCl}_3$ ):  $\delta$  7.39 (d,  $J = 4.1$  Hz, 4H), 7.35 (dd,  $J = 8.4, 4.0$  Hz, 1H), 7.31 (d,  $J = 8.3$  Hz, 2H), 7.23 (d,  $J = 8.5$  Hz, 3H), 6.63 (brs, 1H), 5.96 (d,  $J = 14.6$  Hz, 1H), 5.19 (s, 2H), 1.31 (s, 9H);  $^{13}\text{C NMR}$  (100 MHz,  $\text{CDCl}_3$ ):  $\delta$  153.9, 149.4, 136.0, 133.5, 128.7, 128.5, 128.4, 125.7, 125.2, 123.5, 111.1, 67.4, 34.6, 31.4.

#### ***Benzyl 4-fluorostyrylcarbamate (2e)***

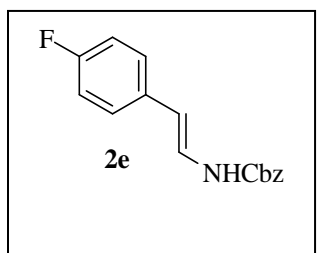

The procedure **3 (C)** was followed for the reaction of **7e** (191 mg, 1 mmol) to enecarbamate **2e**. The crude product was purified by column chromatography using 4% (Hexane / EtOAc) solvent system to get 188 mg (yield: 69%) of the desired compound **2e** as a white solid.  $^1\text{H NMR}$  (600 MHz,  $\text{CDCl}_3$ ):  $\delta$  7.38 (d,  $J = 3.9$  Hz, 4H), 7.22 (t, 2H), 7.16 (dd,  $J = 14.0, 11.6$  Hz, 1H), 6.97 (t,  $J = 8.7$  Hz, 3H), 6.74 (brs, 1H), 5.94 (d,  $J = 14.6$  Hz, 1H), 5.19 (s, 2H);  $^{13}\text{C NMR}$  (100 MHz,  $\text{CDCl}_3$ ):  $\delta$  162.8, 160.4, 153.9, 135.9, 132.4, 128.7, 128.5, 128.4, 126.8, 126.7, 123.9, 115.7, 115.5, 110.1, 67.5.

#### ***Benzyl 4-chlorostyrylcarbamate (2f)***

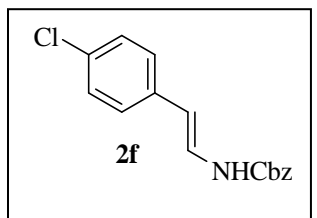

The procedure **3 (C)** was followed for the reaction of **7f** (208 mg, 1 mmol) to enecarbamate **2f**. The crude product was purified by column chromatography using 3.5% (Hexane / EtOAc) solvent system to get 192 mg (yield: 67%) of the desired compound **2f** as a white solid.  $^1\text{H NMR}$  (600 MHz,  $\text{CDCl}_3$ ):  $\delta$  7.40 – 7.34 (m, 5H), 7.23 (d,  $J = 8.5$  Hz,

3H), 7.19 (d,  $J = 8.2$  Hz, 2H), 6.73 (brs, 1H), 5.92 (d,  $J = 14.5$  Hz, 1H), 5.19 (s, 2H);  $^{13}\text{C}$  NMR (100 MHz,  $\text{CDCl}_3$ ):  $\delta$  153.7, 135.9, 134.9, 131.9, 128.9, 128.8, 128.7, 128.5, 126.6, 124.7, 109.9, 67.7.

#### ***Benzyl 4-bromostyrylcarbamate (2g)***

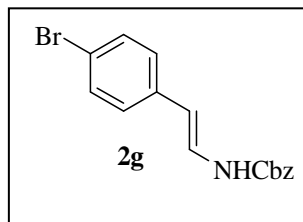

The procedure **3 (C)** was followed for the reaction of **7g** (252 mg, 1 mmol) to enecarbamate **2g**. The crude product was purified by column chromatography using 4% (Hexane / EtOAc) solvent system to get 206 mg (yield: 62%) of the desired compound **2g** as a white solid.  $^1\text{H}$  NMR (600 MHz,  $\text{CDCl}_3$ ):  $\delta$  7.38 (d,  $J = 8.1$  Hz, 6H), 7.22 (d,  $J = 13.3$  Hz, 1H), 7.13 (d,  $J = 7.8$  Hz, 3H), 6.67 (d,  $J = 10.9$  Hz, 1H), 5.90 (d,  $J = 14.5$  Hz, 1H), 5.19 (s, 2H);  $^{13}\text{C}$  NMR (75 MHz,  $\text{CDCl}_3$ ):  $\delta$  153.7, 135.8, 135.4, 131.8, 128.8, 128.6, 128.5, 126.9, 124.7, 119.9, 109.9, 67.7.

#### ***Benzyl 3-methylstyrylcarbamate (2h)***

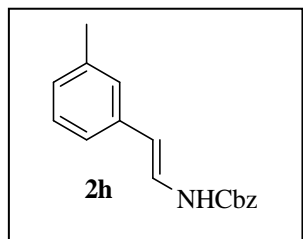

The procedure **3 (C)** was followed for the reaction of **7h** (187 mg, 1 mmol) to enecarbamate **2h**. The crude product was purified by column chromatography using 4% (Hexane / EtOAc) solvent system to get 228 mg (yield: 85%) of the desired compound **2h** as a white solid.  $^1\text{H}$  NMR (600 MHz,  $\text{CDCl}_3$ ):  $\delta$  7.36 – 7.30 (m, 5H), 7.21 (t,  $J = 12.7$  Hz, 1H), 7.13 (t,  $J = 7.6$  Hz, 1H), 7.08 (s, 1H), 7.05 (d,  $J = 7.4$  Hz, 1H), 6.95 (d,  $J = 7.4$  Hz, 1H), 6.71 (d,  $J = 10.8$  Hz, 1H), 5.90 (d,  $J = 14.5$  Hz, 1H), 5.15 (s, 2H), 2.28 (s, 3H);  $^{13}\text{C}$  NMR (100 MHz,  $\text{CDCl}_3$ ):  $\delta$  153.8, 138.2, 136.2, 136.0, 128.7, 128.6, 128.5, 128.3, 127.3, 126.1, 123.9, 122.6, 111.3, 67.5, 21.5.

#### ***Benzyl 3-chlorostyrylcarbamate (2i)***

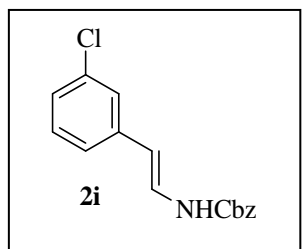

The procedure **3 (C)** was followed for the reaction of **7i** (208 mg, 1 mmol) to enecarbamate **2i**. The crude product was purified by column chromatography using 4% (Hexane / EtOAc) solvent system to get 187 mg (yield: 65%) of the desired compound **2i** as a white solid.  $^1\text{H}$  NMR (600 MHz,  $\text{CDCl}_3$ ):  $\delta$  7.38 – 7.33 (m, 5H), 7.23 (d,  $J = 5.5$  Hz, 2H), 7.17 (t,  $J = 7.8$  Hz, 1H), 7.11 (t,  $J = 9.3$  Hz, 2H), 6.81 (d,  $J = 8.5$  Hz, 1H), 5.88 (d,  $J = 14.5$  Hz, 1H), 5.18 (s, 2H);  $^{13}\text{C}$  NMR (100 MHz,  $\text{CDCl}_3$ ):  $\delta$  153.7, 138.3, 135.8, 134.6, 130.0, 128.8, 128.6, 128.4, 126.3, 125.4, 125.3, 123.4, 109.8, 67.7.

### ***Benzyl 3-bromostyrylcarbamate (2j)***

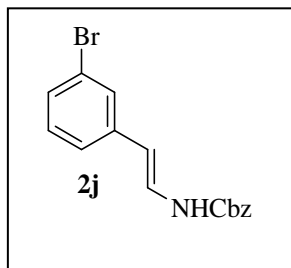

The procedure **3 (C)** was followed for the reaction of **7j** (252 mg, 1 mmol) to enecarbamate **2j**. The crude product was purified by column chromatography using 3.5% (Hexane / EtOAc) solvent system to get 294 mg, (yield: 89%) of the desired compound **2j** as a white solid. **<sup>1</sup>H NMR (600 MHz, CDCl<sub>3</sub>):**  $\delta$  7.41 (s, 1H), 7.38 (brs, 5H), 7.28 (d,  $J = 7.3$  Hz, 1H), 7.19 (d,  $J = 7.3$  Hz, 1H), 7.12 (t,  $J = 7.8$  Hz, 1H), 6.88 (brs, 1H), 5.89 (d,  $J = 14.5$  Hz, 1H), 5.20 (s, 2H); **<sup>13</sup>C NMR (100 MHz, CDCl<sub>3</sub>):**  $\delta$  153.7, 138.6, 135.8, 130.2, 129.2, 128.8, 128.6, 128.4, 128.3, 125.3, 123.8, 122.9, 109.6, 67.7.

### ***Benzyl 2-methylstyrylcarbamate (2k)***

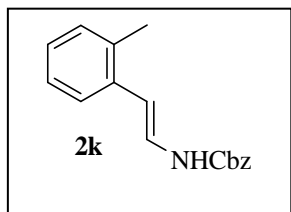

The procedure **3 (C)** was employed for the reaction of **7k** (187 mg, 1 mmol) to enecarbamate **2k**. The crude product was purified by column chromatography using 3% (Hexane / EtOAc) solvent system to get 212 mg, (yield: 79%) of the desired compound **2k** as a white solid. **<sup>1</sup>H NMR (400 MHz, CDCl<sub>3</sub>):**  $\delta$  7.41 – 7.34 (m, 6H), 7.17 – 7.09 (m,  $J = 17.5, 7.0$  Hz, 4H), 6.70 (brs, 1H), 6.15 (d,  $J = 14.4$  Hz, 1H), 5.20 (s, 2H), 2.29 (s, 3H); **<sup>13</sup>C NMR (100 MHz, CDCl<sub>3</sub>):**  $\delta$  153.7, 136.0, 135.1, 134.8, 130.5, 128.8, 128.6, 128.5, 126.7, 126.4, 124.9, 124.8, 109.0, 67.6, 20.2.

### ***Benzyl 2-fluorostyrylcarbamate (2l)***

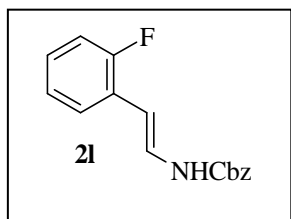

The procedure **3 (C)** was followed for the reaction of **7l** (191 mg, 1 mmol) to enecarbamate **2l**. The crude product was purified by column chromatography using 3% (Hexane / EtOAc) solvent system to get 234 mg (yield: 86%) of the desired compound **2l** as a white solid. **<sup>1</sup>H NMR (600 MHz, CDCl<sub>3</sub>):**  $\delta$  7.40 – 7.34 (m, 7H), 7.12 (dd,  $J = 13.2, 5.9$  Hz, 1H), 7.05 (t,  $J = 7.5$  Hz, 1H), 7.01 (dd,  $J = 10.2, 8.8$  Hz, 1H), 6.85 (brs, 1H), 6.09 (d,  $J = 14.5$  Hz, 1H), 5.20 (s, 2H); **<sup>13</sup>C NMR (100 MHz, CDCl<sub>3</sub>):**  $\delta$  160.9, 158.5, 153.7, 135.9, 128.8, 128.6, 128.4, 127.6, 127.5, 126.4, 126.4, 126.2, 126.1, 124.3, 124.3, 124.2, 124.1, 115.9, 115.6, 103.7, 103.7, 67.7.

### ***Benzyl 2-chlorostyrylcarbamate (2m)***

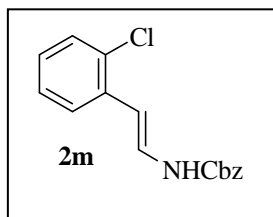

The procedure **3 (C)** was followed for the reaction of **7m** (208 mg, 1 mmol) to enecarbamate **2m**. The crude product was purified by column chromatography using 2.5% (Hexane / EtOAc) solvent system to get 256

mg (yield: 89%) of the desired compound **2m** as a white solid. **<sup>1</sup>H NMR (400 MHz, CDCl<sub>3</sub>):** δ 7.48 (d, *J* = 7.6 Hz, 1H), 7.38 (brs, 5H), 7.32 (d, *J* = 8.0 Hz, 1H), 7.21 (d, *J* = 5.5 Hz, 1H), 7.18 (d, *J* = 7.5 Hz, 1H), 7.10 (t, *J* = 7.6 Hz, 1H), 6.79 (d, *J* = 8.6 Hz, 1H), 6.34 (d, *J* = 14.5 Hz, 1H), 5.20 (s, 2H); **<sup>13</sup>C NMR (100 MHz, CDCl<sub>3</sub>):** δ 153.6, 135.9, 134.4, 132.3, 129.9, 128.9, 128.7, 128.5, 127.6, 127.1, 126.1, 125.8, 107.3, 67.8.

#### ***Benzyl 2-bromostyrylcarbamate (2n)***

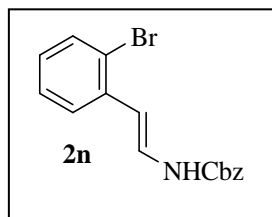

The procedure **3 (C)** was followed for the reaction of **7n** (252 mg, 1 mmol) to enecarbamate **2n**. The crude product was purified by column chromatography using 3% (Hexane / EtOAc) solvent system to get 220 mg (yield: 66%) of the desired compound **2n** as a white solid. **<sup>1</sup>H NMR (400 MHz, CDCl<sub>3</sub>):** δ 7.52 (d, *J* = 8.0 Hz, 1H), 7.47 (d, *J* = 7.7 Hz, 1H), 7.38 (brs, 5H), 7.22 (dd, *J* = 16.1, 9.1 Hz, 2H), 7.03 (t, *J* = 6.9 Hz, 1H), 6.82 (brs, 1H), 6.32 (d, *J* = 14.5 Hz, 1H), 5.20 (s, 2H); **<sup>13</sup>C NMR (100 MHz, CDCl<sub>3</sub>):** δ 153.6, 136.2, 135.9, 133.1, 128.8, 128.7, 128.5, 127.9, 127.8, 126.2, 126.0, 123.0, 109.9, 67.8.

#### ***Benzyl 2,4-dimethylstyrylcarbamate (2o)***

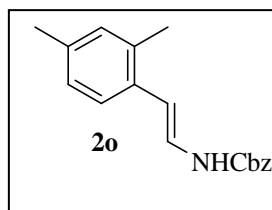

The procedure **3 (C)** was followed for the reaction of **7o** (201 mg, 1 mmol) to enecarbamate **2o**. The crude product was purified by column chromatography using 4% (Hexane / EtOAc) solvent system to get 199 mg (yield: 71%) of the desired compound **2o** as a white solid. **<sup>1</sup>H NMR (400 MHz, CDCl<sub>3</sub>):** δ 7.39 (d, *J* = 4.1 Hz, 4H), 7.29 (d, *J* = 7.9 Hz, 1H), 7.07 (dd, *J* = 22.1, 10.6 Hz, 2H), 6.97 (s, 1H), 6.95 (s, 1H), 6.63 (d, *J* = 10.2 Hz, 1H), 6.11 (d, *J* = 14.4 Hz, 1H), 5.19 (s, 2H), 2.29 (s, 3H), 2.25 (s, 3H); **<sup>13</sup>C NMR (100 MHz, CDCl<sub>3</sub>):** δ 153.7, 136.4, 136.1, 134.6, 132.2, 131.2, 128.8, 128.6, 128.5, 127.1, 124.9, 124.1, 109.0, 67.6, 21.2, 20.1.

#### ***S-benzyl N-styrylcarbamothioate (2p)***

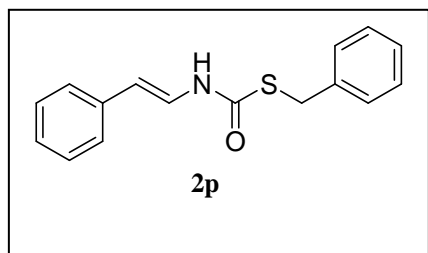

The procedure **3 (C)** was followed for the reaction of **7p** (173 mg, 1 mmol) to enecarbamate **2p**. The crude product was purified by column chromatography using 4% (Hexane / EtOAc) solvent system to get 227 mg (yield: 84%) of the desired compound **2p** as a white solid. **<sup>1</sup>H NMR (600 MHz, CDCl<sub>3</sub>):** δ 7.43 (brs, 1H), 7.37 (d, *J* = 7.3 Hz, 2H), 7.33 (t, *J* = 7.5 Hz, 2H), 7.30 (d, *J* = 4.3 Hz, 4H), 7.27 (s, 1H), 7.19 (dt, *J* = 8.6, 4.3 Hz, 1H), 7.11 (brs, 1H),

6.05 (d,  $J = 14.5$  Hz, 1H), 4.25 (s, 2H);  $^{13}\text{C}$  NMR (100 MHz,  $\text{CDCl}_3$ ):  $\delta$  165.2, 138.0, 136.3, 129.0, 128.7, 127.4, 126.6, 125.6, 123.3, 112.3, 34.2.

#### *tert-butyl styrylcarbamate (2q)*

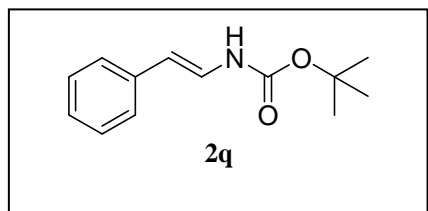

The procedure **3 (C)** was followed for the reaction of **7q** (173 mg, 1 mmol) to enecarbamate **2q**. The crude product was purified by column chromatography using 4% (Hexane / EtOAc) solvent system to get 94 mg (yield: 43%) of the desired compound **2q** as a white solid.  $^1\text{H}$  NMR (600 MHz,  $\text{CDCl}_3$ ):  $\delta$  7.30 (d,  $J = 4.3$  Hz, 5H), 7.18 (dt,  $J = 8.4, 4.1$  Hz, 1H), 6.49 (brs, 1H), 5.94 (d,  $J = 14.5$  Hz, 1H), 1.53 (s, 9H);  $^{13}\text{C}$  NMR (125 MHz,  $\text{CDCl}_3$ ):  $\delta$  152.8, 136.7, 128.8, 126.2, 125.3, 124.5, 109.9, 81.1, 28.4.

$^1\text{H}$  NMR (600 MHz,  $\text{CDCl}_3$ ):  $\delta$  7.30 (d,  $J = 4.3$  Hz, 5H), 7.18 (dt,  $J = 8.4, 4.1$  Hz, 1H), 6.49 (brs, 1H), 5.94 (d,  $J = 14.5$  Hz, 1H), 1.53 (s, 9H);  $^{13}\text{C}$  NMR (125 MHz,  $\text{CDCl}_3$ ):  $\delta$  152.8, 136.7, 128.8, 126.2, 125.3, 124.5, 109.9, 81.1, 28.4.

#### *Allyl styrylcarbamate (2r)*

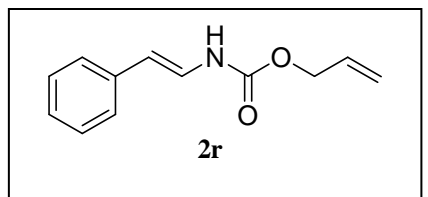

The procedure **3 (C)** was followed for the reaction of **7r** (173 mg, 1 mmol) to enecarbamate **2r**. The crude product was purified by column chromatography using 4% (Hexane / EtOAc) solvent system to get 177 mg (yield: 87%) of the desired compound **2r** as a white sticky solid.  $^1\text{H}$  NMR (600 MHz,  $\text{CDCl}_3$ ):  $\delta$  7.30 – 7.27 (m, 5H), 7.23 (s, 1H), 7.16 (dd,  $J = 8.6, 5.0$  Hz, 1H), 6.63 (d,  $J = 8.3$  Hz, 1H), 5.98 (d,  $J = 14.6$  Hz, 1H), 5.35 (d,  $J = 17.1$  Hz, 1H), 5.26 (d,  $J = 10.3$  Hz, 1H), 4.66 (d,  $J = 4.8$  Hz, 2H);  $^{13}\text{C}$  NMR (125 MHz,  $\text{CDCl}_3$ ):  $\delta$  153.5, 136.2, 132.2, 128.6, 126.3, 125.3, 124.0, 118.4, 110.9, 66.2.

$^1\text{H}$  NMR (600 MHz,  $\text{CDCl}_3$ ):  $\delta$  7.30 – 7.27 (m, 5H), 7.23 (s, 1H), 7.16 (dd,  $J = 8.6, 5.0$  Hz, 1H), 6.63 (d,  $J = 8.3$  Hz, 1H), 5.98 (d,  $J = 14.6$  Hz, 1H), 5.35 (d,  $J = 17.1$  Hz, 1H), 5.26 (d,  $J = 10.3$  Hz, 1H), 4.66 (d,  $J = 4.8$  Hz, 2H);  $^{13}\text{C}$  NMR (125 MHz,  $\text{CDCl}_3$ ):  $\delta$  153.5, 136.2, 132.2, 128.6, 126.3, 125.3, 124.0, 118.4, 110.9, 66.2.

#### *Prop-2-ynyl styrylcarbamate (2s)*

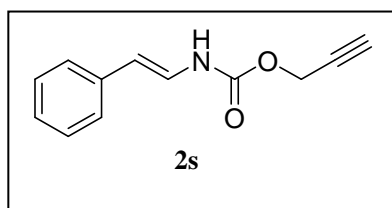

The procedure **3 (C)** was followed for the reaction of **7s** (173 mg, 1 mmol) to enecarbamate **2s**. The crude product was purified by column chromatography using 5% (Hexane / EtOAc) solvent system to get 175 mg (yield: 87%) of the desired compound **2s** as a white solid.  $^1\text{H}$  NMR (400 MHz,  $\text{CDCl}_3$ ):  $\delta$

$\delta$  7.29 (d,  $J = 3.4$  Hz, 4H), 7.23 (d,  $J = 2.8$  Hz, 1H), 7.19 (s, 1H), 6.97 (brs, 1H), 6.03 (d,  $J = 14.5$  Hz, 1H), 4.78 (s, 2H), 2.53 (s, 1H);  $^{13}\text{C}$  NMR (100 MHz,  $\text{CDCl}_3$ ):  $\delta$  153.0, 136.1, 128.8, 126.6, 125.5, 123.7, 111.9, 77.8, 75.5, 53.3.

#### 4. References:

- 1) (a) P. Wipf and J.-K. Jung, *J. Org. Chem.*, 2000, **65**, 6319; (b) J. Seayad, A.-M. Seayad and B. List, *J. Am. Chem. Soc.*, 2006, **128**, 1086.

- 2) (a) T. Akiyama, J. Itoh, K. Yokota and K. Fuchibe, *Angew. Chem. Int. Ed.*, 2004, **43**, 1566; (b) T. Akiyama, H. Morita, J. Itoh and K. Fuchibe, *Org. Lett.*, 2005, **7**, 2583; also see: (c) T. Akiyama, PCT Int. Appl. WO 200409675, 2004; (d) T. Akiyama, Y. Saitoh, H. Morita and K. Fuchibe, *Adv. Synth. Catal.*, 2005, **347**, 1523.
- 3) (a) D. Uraguchi and M. Terada, *J. Am. Chem. Soc.*, 2004, **126**, 5356; (b) D. Uraguchi, K. Sorimachi and M. Terada, *J. Am. Chem. Soc.*, 2004, **126**, 11804; (c) D. Uraguchi, K. Sorimachi and M. Terada, *J. Am. Chem. Soc.*, 2005, **127**, 9360; also see: (d) M. Terada, D. Uraguchi, K. Sorimachi and H. Shimizu, PCT Int. Appl. WO 2005070875, 2005.
- 4) B. Meier, J.-N. Dumez, G. Stevanato, J. T. Hill-Cousins, S. S. Roy, P. Håkansson, S. Mamone, R. C. D. Brown, G. Pileio and M. H. Levitt, *J. Am. Chem. Soc.*, 2013, **135**, 18746.
- 5) (a) M.-W. Chen, L.-L. Cao, Z.-S. Ye, G.-F. Jiang and Y.-G. Zhou, *Chem. Commun.*, 2013, **49**, 1660; (b) S. Saha and C. Schneider, *Org. Lett.*, 2015, **17**, 648.
- 6) X. Li, J. Sheng, G. Huang, F. Yin and D. Sang, *Eur. J. Med. Chem.*, 2015, **97**, 32.
- 7) (a) A. Carboni, G. Dagousset, E. Magnier and G. Masson, *Org. Lett.*, 2014, **16**, 1240; (b) T. Hashimoto, H. Nakatsu, Y. Takiguchi and K. Maruoka, *J. Am. Chem. Soc.*, 2013, **135**, 16010.

5. **General procedure for the synthesis of trisubstituted Chromans (3):**

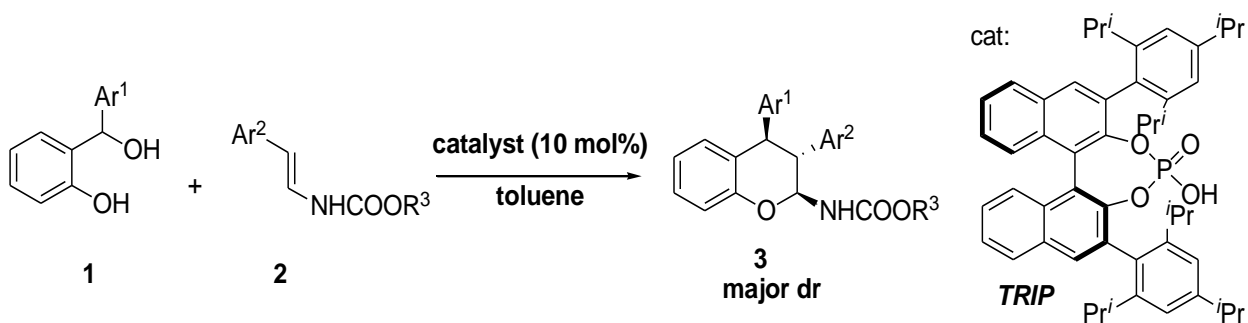

To a solution of *o*-hydroxybenzyl alcohol (**1**) (0.08 mmol), enecarbamate (**2**) (0.12 mmol) in 0.4 ml dry toluene, catalyst **VI** (10 mol%) was added. Then the reaction mixture was stirred at room temperature for 3 to 4 days unless otherwise noted. After the completion of reaction, reaction mixture was directly subjected to the column using 5-7% (hexane/ ethyl acetate) to obtain the desired product (**3**).

## 6. Solvent and temperature screening:

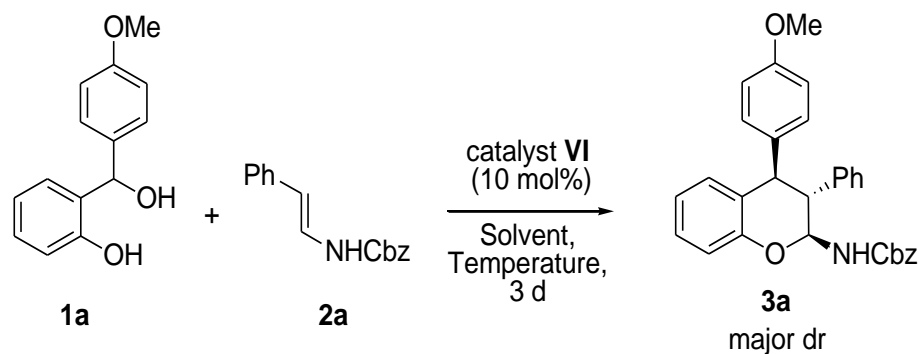

| entry <sup>a</sup> | solvent | temperature | yield <sup>b</sup> % | ee <sup>c</sup> % |
|--------------------|---------|-------------|----------------------|-------------------|
| 1                  | toluene | rt          | 81                   | 90                |
| 2                  | DCM     | rt          | 54                   | 88                |
| 3 <sup>d</sup>     | DCM     | rt          | 65                   | 82                |
| 4                  | DMF     | rt          | n.d                  | -                 |
| 5                  | DCE     | rt          | 74                   | 90                |
| 6                  | toluene | 0 °C        | 82                   | 88                |

<sup>a</sup>Reaction condition: 0.04 mmol of **1a** and 0.06 mmol of **2a** in 0.2 mL solvent using 10 mol% catalyst for 3 days.

<sup>b</sup>Isolated yield after silica gel column chromatography. <sup>c</sup>Determined by HPLC and of the major diastereomer. <sup>d</sup>5 mg 4A° MS was used.

## 7. Possible mechanistic pathway involved in the synthesis of trisubstituted chromans (3):

If the reaction underwent via concerted [4+2] mechanism then only two diastereomers **3** and **3'** can be formed, not only that but also *trans* geometry of enecarbamates **2** also will be retained in the tri-substituted chroman products. On the other hand, if the reaction underwent through stepwise path there might be a possibility of four diastereomers formation (diastereomer **3**, **3'**, **3''** & **3'''**). In that case *trans* geometry of enecarbamates **2** will not necessarily be retained in the tri-substituted chroman products. (**Scheme 1**).

In all of our experiments, we finely observed the presence of only two diastereomers **3** & **3'** with generally high diastereomeric ratio determined from <sup>1</sup>H NMR experiment and HPLC analysis. Relative stereo chemistry of the product **3** & **3'** were confirmed from coupling constant value

and from **COSY** & **NOESY** experiment. However, we did not get any traces of product **3''** & **3'''**. These results might support the highly concerted nature of the concerned reaction.

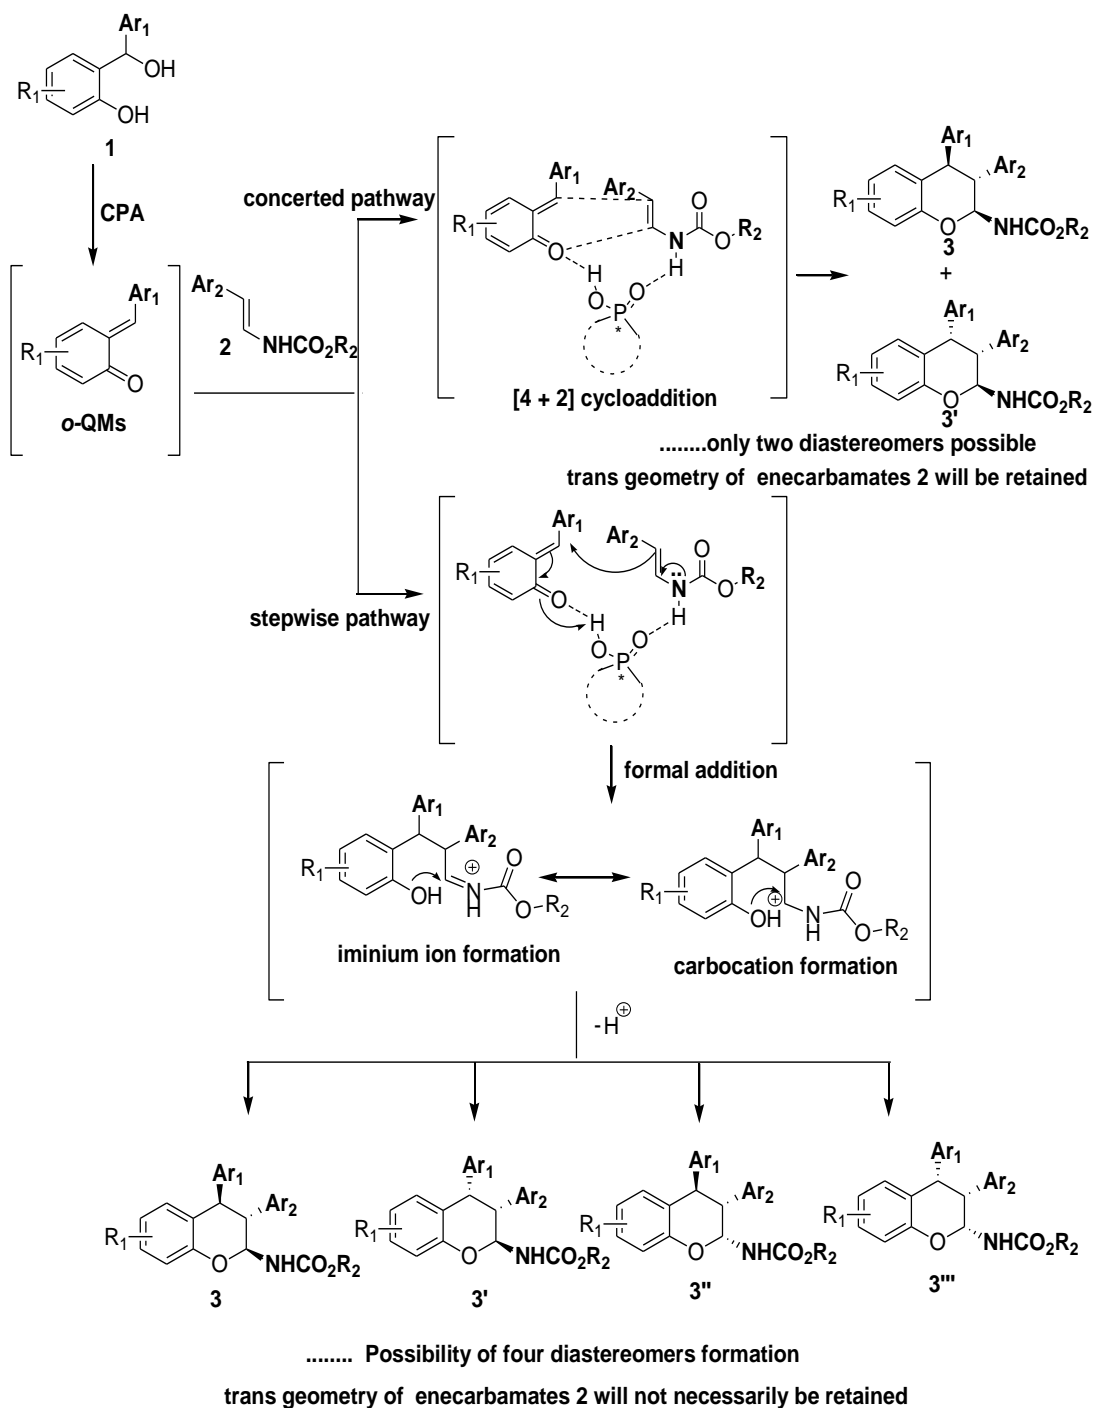

**Scheme 1.** Analysis of chroman formation based on Stepwise & concerted mechanism



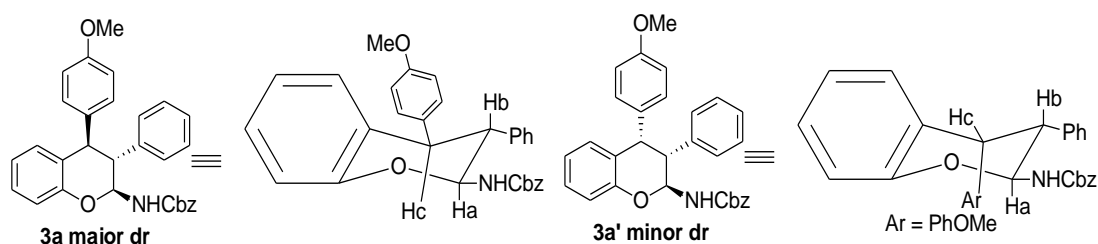

Stereo specific addition of the encarbamates **2** can also be supported by considering the coupling constant value of three characteristic protons  $H_a$ ,  $H_b$  &  $H_c$  present in the chroman ring. As for example it is shown below for the compound (**3a/3a'**), **Diastereomeric ratio: 5.6:1**.

For **3a (major dr)**:  $H_a$ : 5.97 (t,  $J = 9.6$  Hz, 1H),  $H_b$ : 3.12 (t,  $J = 10.3$  Hz, 1H),  $H_c$ : 4.31 (d,  $J = 10.9$  Hz, 1H) & for **3a' (minor dr)**:  $H_a$ : 6.14 (t,  $J = 10.3$  Hz, 0.2H),  $H_b$ : 3.50 (dd,  $J = 10.2, 4.8$  Hz, 0.2H),  $H_c$ : 4.25 (d,  $J = 5.2$  Hz, 0.2H).

In addition, if the reaction proceeded via stepwise mechanism, then the iminium ion & carbocation intermediates might be captured by an external reactive nucleophile like indole for its stability as reported by *Shi et al.*<sup>8</sup> Hence, we carried out our reaction in presence of indole (**Scheme 2**. below) but the intercepted product **9** was not formed. Instead of that we got the product **10** as major along with trace amount of tri-substituted product (**3a/3a'**). From this experiment we proposed that the concerned reaction possibly underwent via concerted pathway rather than stepwise way.

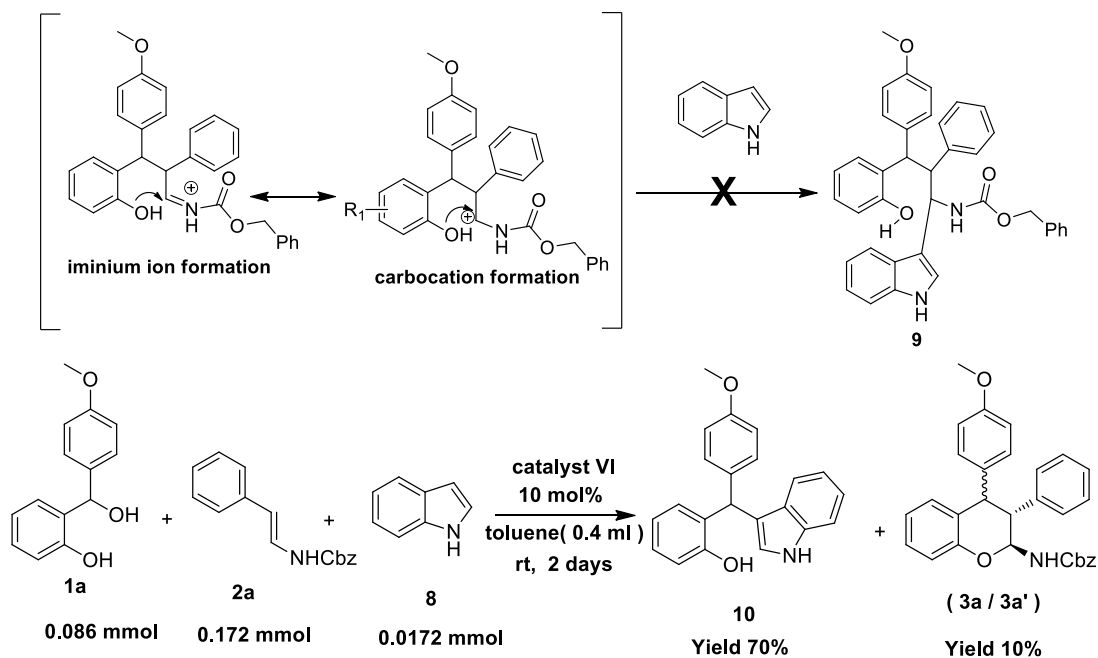

**Scheme 2.** Trapping experiment using indole as reactive nucleophile

8) J.-J. Zhao, S.-B. Sun, S.-H. He, Q. Wu and F. Shi, *Angew. Chem. Int. Ed.*, 2015, **54**, 5460.

**Characterization data of compound 10:**  $^1\text{H NMR}$  (600 MHz,  $\text{CDCl}_3$ ):  $\delta$  8.04 (s, 1H), 7.37 (d,  $J = 8.2$  Hz, 1H), 7.28 (d,  $J = 8.0$  Hz, 1H), 7.21 – 7.15 (m, 4H), 7.02 (t,  $J = 7.5$  Hz, 1H), 6.95 (d,  $J = 6.9$  Hz, 1H), 6.85 (d,  $J = 8.7$  Hz, 4H), 6.68 (d,  $J = 1.4$  Hz, 1H), 5.77 (s, 1H), 5.02 (s, 1H), 3.79 (s, 3H); **HRMS (-ESI):** Calc for  $(\text{C}_{22}\text{H}_{19}\text{NO}_2\text{-H})^-$   $[\text{M-H}]^-$  328.1343; found: 328.1345,  $^{13}\text{C NMR}$  (100 MHz,  $\text{CDCl}_3$ ):  $\delta$  158.5, 154.1, 137.1, 134.5, 130.2, 130.1, 129.2, 128.1, 127.0, 124.1, 122.7, 121.0, 120.1, 119.9, 118.1, 116.5, 114.2, 111.4, 55.4, 42.7.

**$^1\text{H NMR}$  &  $^{13}\text{C NMR}$  spectra of compound 10:**

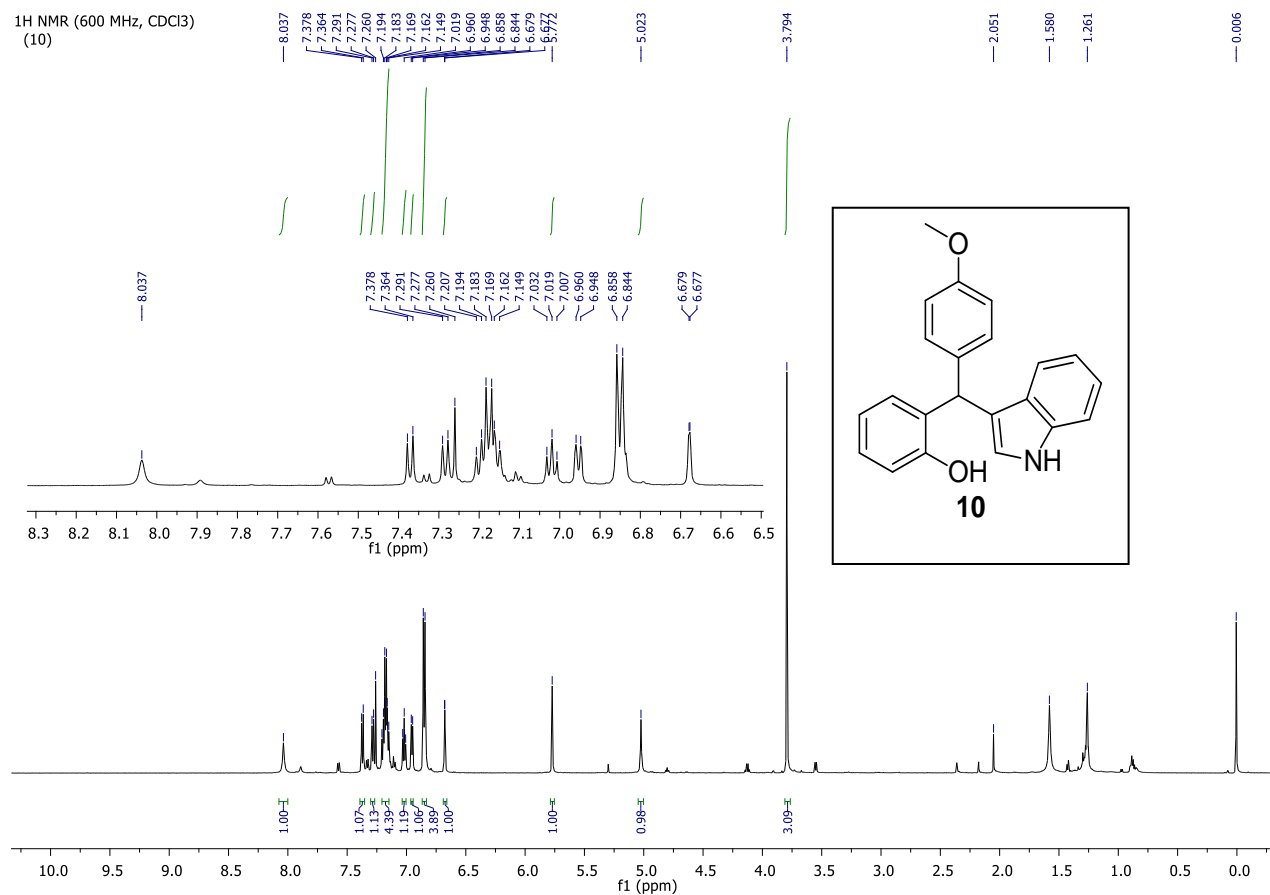

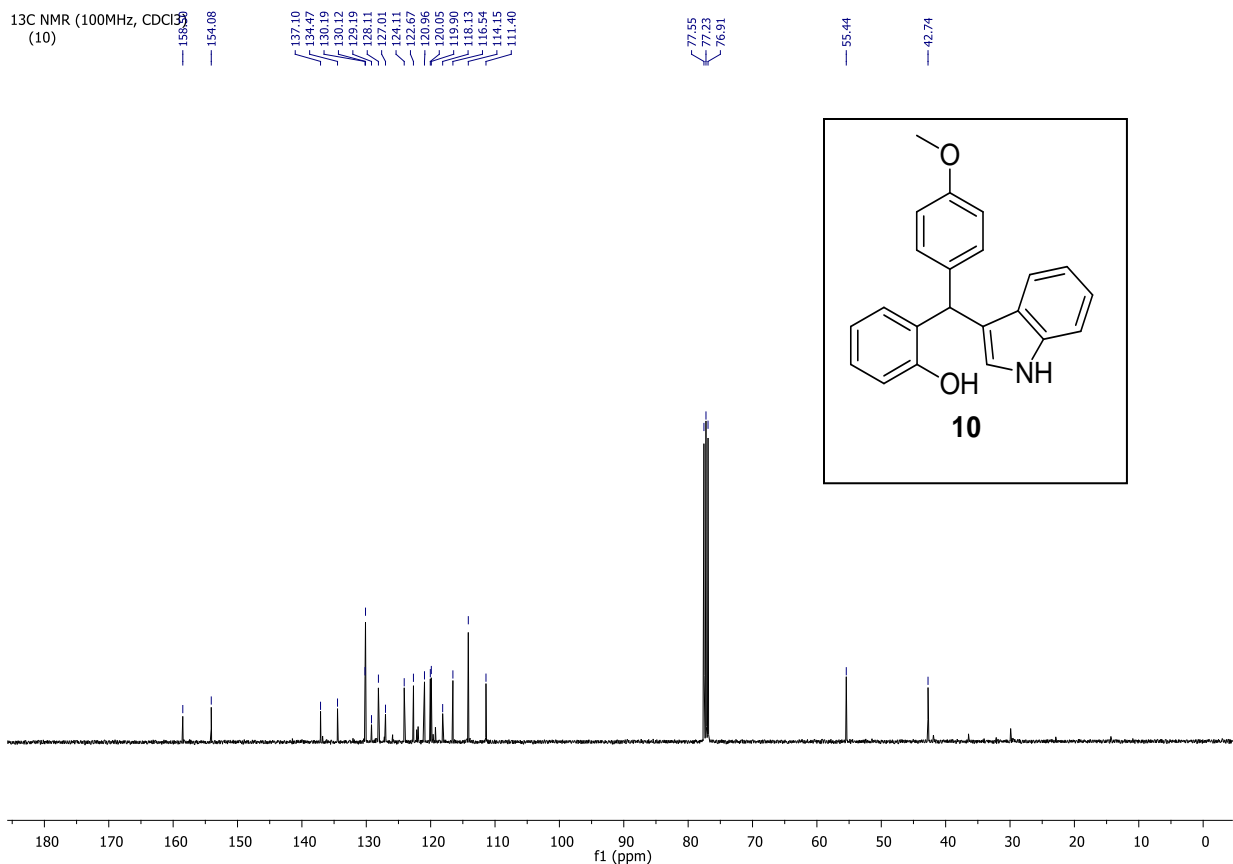

## 8. Characterization data for the trisubstituted chromans (3):

### *Benzyl 3,4-dihydro-4-(4-methoxyphenyl)-3-phenyl-2H-chromen-2-ylcarbamate (3a/3a')*

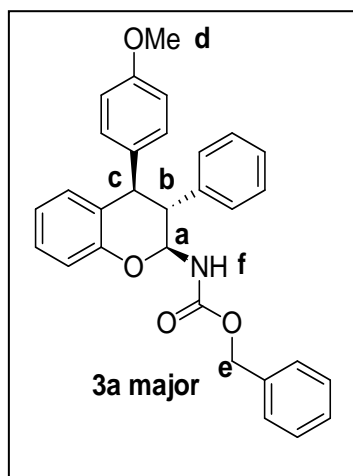

Compound (**3a/3a'**) was prepared according to the general procedure **5**; **Reaction time**: 3 days; purified by column chromatography using 6% (Hexane / EtOAc) solvent system. White solid (30.2 mg, yield: 81%); **mp**: 114-116 °C; **Diastereomeric ratio**: 5.6:1; **<sup>1</sup>H NMR (600 MHz, CDCl<sub>3</sub>)**: δ 7.30 (brs, 3H), 7.23 – 7.13 (m, 7H), 7.03 (d, *J* = 8.2 Hz, 0.3H), 6.97 (d, *J* = 8.4 Hz, 1H), 6.93 (d, *J* = 5.6 Hz, 2H), 6.82 (t, *J* = 7.4 Hz, 1H), 6.78 (d, *J* = 8.5 Hz, 2H), 6.74 (d, *J* = 7.7 Hz, 1H), 6.68 (d, *J* = 8.6 Hz, 2H), 6.63 (d, *J* = 8.6 Hz, 0.5H), 6.51 (d, *J* = 8.6 Hz, 0.4H), 6.14 (t, *J* = 10.3 Hz, 0.2H<sub>a</sub> minor), 5.97 (t, *J* = 9.6 Hz, 1H<sub>a</sub> major), 5.42 (d, *J* = 8.9 Hz, 1H<sub>f</sub>), 5.03 (dd, *J* = 30.8, 11.1 Hz, 2.2H<sub>e</sub>), 4.31 (d, *J* = 10.9 Hz, 1H<sub>c</sub> major), 4.25 (d, *J* = 5.2 Hz, 0.2H<sub>c</sub> minor), 3.73 (s, 0.5H<sub>d</sub> minor), 3.72 (s, 3H<sub>d</sub> major), 3.50 (dd, *J* = 10.2, 4.8 Hz, 0.2H<sub>b</sub> minor), 3.12 (t, *J* = 10.3 Hz, 1H<sub>b</sub> major); **<sup>13</sup>C NMR (150 MHz, CDCl<sub>3</sub>)**: δ 158.4, 155.5, 154.0, 138.8, 136.1, 134.6, 130.1, 128.9,

128.7, 128.4, 128.3, 128.1, 127.3, 126.2, 121.4, 117.2, 113.9, 82.1, 67.2, 55.3, 53.0, 50.8;  
**HRMS (+ESI):** Calc for C<sub>30</sub>H<sub>28</sub>NO<sub>4</sub> [M+H]<sup>+</sup> 466.2013; found: 466.2016.

**HPLC:** Chiralpak IC column. Flow rate 1 mL/min. UV detection at 254 nm for major diastereomer; τ(major) = 20.1 min., τ(minor) = 15.0 min. using hexane: isopropanol = 90:10 as eluent, ee 90%.

**Benzyl 3,4-dihydro-4-(4-methoxyphenyl)-3-p-tolyl-2H-chromen-2-ylcarbamate (3b/3b')**

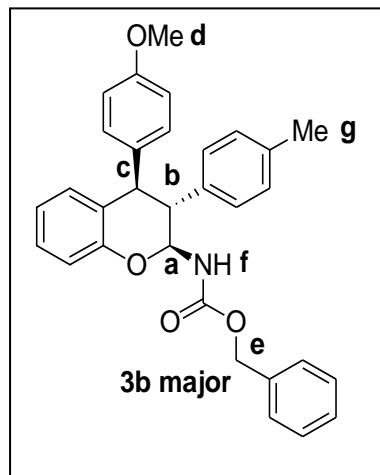

Compound (**3b/3b'**) was prepared according to the general procedure **5**; **Reaction time:** 3 days; purified by column chromatography using 6% (Hexane / EtOAc) solvent system. White solid (32.2 mg, yield: 84%); **mp:** 53-55 °C; **Diastereomeric ratio:** 5:1; **<sup>1</sup>H NMR (600 MHz, CDCl<sub>3</sub>):** δ 7.30 (brs, 3H), 7.20 (brs, 2H), 7.15 (t, *J* = 7.5 Hz, 1H), 6.97 (dd, *J* = 15.2, 7.8 Hz, 4H), 6.84 – 6.75 (m, 5H), 6.73 (d, *J* = 7.6 Hz, 1H), 6.69 (d, *J* = 8.5 Hz, 2H), 6.63 (d, *J* = 8.4 Hz, 0.4H), 6.52 (d, *J* = 8.4 Hz, 0.4H), 6.10 (t, *J* = 10.2 Hz, 0.2H<sub>a</sub> minor), 5.93 (brs, 1H<sub>a</sub>

major), 5.34 (brs, 1H<sub>f</sub>), 5.04 (d, *J* = 19.8 Hz, 2.4H<sub>e</sub>), 4.29 (d, *J* = 11.0 Hz, 1H<sub>c</sub> major), 4.22 (d, *J* = 5.3 Hz, 0.2H<sub>c</sub> minor), 3.73 (s, 3.6H<sub>d</sub>), 3.07 (t, *J* = 9.6 Hz, 1H<sub>b</sub> major), 2.29 (s, 0.5H<sub>g</sub> minor), 2.27 (s, 3H<sub>g</sub> major); **<sup>13</sup>C NMR (150 MHz, CDCl<sub>3</sub>):** δ 158.4, 155.5, 154.0, 136.8, 136.2, 135.7, 134.8, 131.4, 130.2, 130.1, 129.6, 129.0, 129.0, 128.7, 128.3, 128.2, 128.0, 126.3, 124.7, 121.3, 121.1, 117.2, 117.0, 113.8, 113.3, 82.2, 82.2, 67.2, 67.2, 55.4, 55.3, 52.5, 50.7, 48.6, 48.4, 21.3; **HRMS (+ESI):** Calc for C<sub>31</sub>H<sub>30</sub>NO<sub>4</sub> [M+H]<sup>+</sup> 480.2169; found: 480.2172.

**HPLC:** Chiralpak IA column. Flow rate 1 mL/min. UV detection at 220 nm for major diastereomer; τ(major) = 33.6 min., τ(minor) = 58.2 min. using hexane: isopropanol = 90:10 as eluent, ee 92%.

**Benzyl 3,4-dihydro-3-(4-isopropylphenyl)-4-(4-methoxyphenyl)-2H-chromen-2-ylcarbamate (3c/3c')**

Compound (**3c/3c'**) was prepared according to the general procedure **5**; **Reaction time:** 3 days; purified by column chromatography using 6% (Hexane / EtOAc) solvent system. Pale yellow solid (34.5 mg, yield: 85%); **mp:** 48-50 °C; **Diastereomeric ratio:** 8.3:1; **<sup>1</sup>H NMR (600 MHz, CDCl<sub>3</sub>):** δ 7.30 (brs, 3H), 7.22 (brs, 2H), 7.15 (t, *J* = 7.5 Hz, 1H), 7.04 (d, *J* = 7.6 Hz, 2H), 6.97 (d, *J* = 8.3 Hz, 1H), 6.82 (dd, *J* = 12.8, 6.2 Hz, 3H), 6.77 (d, *J* = 8.5 Hz, 2H), 6.74 (d, *J* = 7.7 Hz,

1H), 6.68 (d,  $J = 8.6$  Hz, 2H), 6.61 (d,  $J = 8.5$  Hz, 0.5H), 6.48 (d,  $J = 8.5$  Hz, 0.3H), 6.11 (t,  $J =$

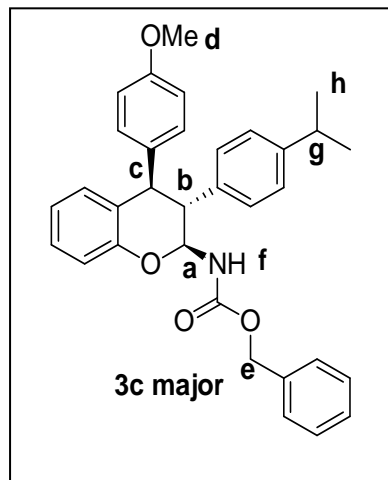

10.2 Hz, 0.1H<sub>a</sub> minor), 5.94 (brs, 1H<sub>a</sub> major), 5.35 (d,  $J = 7.5$  Hz, 1H<sub>f</sub>), 5.04 (d,  $J = 19.8$  Hz, 2.1H<sub>e</sub>), 4.29 (d,  $J = 10.9$  Hz, 1H<sub>c</sub> major), 4.23 (d,  $J = 5.3$  Hz, 0.12H<sub>c</sub> minor), 3.73 (s, 3.4H<sub>d</sub>), 3.08 (t,  $J = 9.8$  Hz, 1H<sub>b</sub> major), 2.83 (dt,  $J = 13.8, 6.9$  Hz, 1.1H<sub>g</sub>), 1.20 (dd,  $J = 6.9, 3.1$  Hz, 6.7H<sub>h</sub>); <sup>13</sup>C NMR (150 MHz, CDCl<sub>3</sub>):  $\delta$  158.4, 155.56, 154.0, 147.7, 136.0, 134.9, 131.4, 130.2, 129.0, 128.7, 128.3, 128.2, 128.0, 126.8, 126.3, 121.3, 117.2, 113.8, 113.2, 82.2, 67.2, 55.3, 52.5, 50.7, 33.8, 24.1, 24.1; HRMS (+ESI): Calc for C<sub>33</sub>H<sub>34</sub>NO<sub>4</sub> [M+H]<sup>+</sup> 508.2482; found: 508.2483.

**HPLC:** Chiralpak IC column. Flow rate 1 mL/min. UV detection at 274 nm for major diastereomer;  $\tau$ (major) = 24.8 min.,  $\tau$ (minor) = 20.0 min. using hexane: isopropanol = 93:7 up to  $\tau = 30.0$  min. thereafter, hexane: isopropanol = 86:14 as eluent, ee 88%.

**Benzyl 3-(4-tert-butylphenyl)-3,4-dihydro-4-(4-methoxyphenyl)-2H-chromen-2-ylcarbamate (3d/3d')**

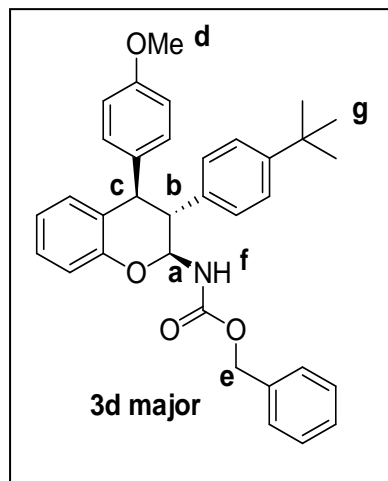

Compound (3d/3d') was prepared according to the general procedure 5; **Reaction time:** 3 days; purified by column chromatography using 6% (Hexane / EtOAc) solvent system. White solid (36.3 mg, yield: 87%); **mp:** 56-58 °C; **Diastereomeric ratio:** 9.1:1; <sup>1</sup>H NMR (600 MHz, CDCl<sub>3</sub>):  $\delta$  7.30 (brs, 4H), 7.23 (brs, 2H), 7.19 (d,  $J = 7.8$  Hz, 2H), 7.15 (t,  $J = 7.5$  Hz, 1H), 6.96 (d,  $J = 8.2$  Hz, 1H), 6.82 (dd,  $J = 16.1, 8.0$  Hz, 3H), 6.77 (d,  $J = 8.5$  Hz, 2H), 6.74 (d,  $J = 7.7$  Hz, 1H), 6.68 (d,  $J = 8.7$  Hz, 2H), 6.59 (d,  $J = 8.7$  Hz, 0.3H), 6.47 (d,  $J = 8.5$  Hz, 0.2H), 6.10 (t,  $J = 10.3$  Hz, 0.1H<sub>a</sub> minor), 5.93 (brs, 1H<sub>a</sub>

major), 5.34 (brs, 1H<sub>f</sub>), 5.04 (d,  $J = 20.0$  Hz, 2H<sub>e</sub>), 4.29 (d,  $J = 10.8$  Hz, 1H<sub>c</sub> major), 4.23 (d,  $J = 5.2$  Hz, 0.11H<sub>c</sub> minor), 3.73 (s, 3.4H<sub>d</sub>), 3.10 (t,  $J = 7.2$  Hz, 1H<sub>b</sub> major), 1.26 (s, 10H<sub>g</sub>); <sup>13</sup>C NMR (150 MHz, CDCl<sub>3</sub>):  $\delta$  158.4, 155.6, 154.0, 150.1, 136.2, 135.6, 135.0, 131.4, 130.2, 128.7, 128.3, 128.1, 128.0, 127.9, 126.3, 125.7, 125.1, 121.3, 117.2, 113.8, 113.1, 82.2, 67.2, 55.3, 52.4, 50.6, 34.6, 31.5; HRMS (+ESI): Calc for C<sub>34</sub>H<sub>36</sub>NO<sub>4</sub> [M+H]<sup>+</sup> 522.2639; found: 522.2639.

**HPLC:** Chiralpak IC column. Flow rate 1 mL/min. UV detection at 274 nm for major diastereomer;  $\tau(\text{major}) = 23.9$  min.,  $\tau(\text{minor}) = 19.9$  min. using hexane: isopropanol = 93:7 up to  $\tau = 55.1$  min. thereafter, hexane: isopropanol = 88:12 as eluent, ee 88%.

**Benzyl 3-(4-fluorophenyl)-3,4-dihydro-4-(4-methoxyphenyl)-2H-chromen-2-ylcarbamate (3e/3e')**

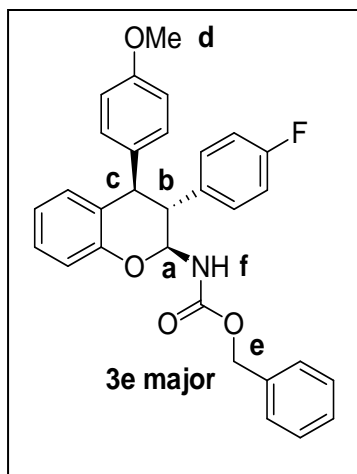

Compound (**3e/3e'**) was prepared according to the general procedure **5**; **Reaction time:** 3 days; purified by column chromatography using 7% (Hexane / EtOAc) solvent system. White solid (28.6 mg, yield: 74%); **mp:** 53-55 °C; **Diastereomeric ratio:** >20:1; **<sup>1</sup>H NMR (600 MHz, CDCl<sub>3</sub>):**  $\delta$  7.30 (brs, 3.2H), 7.19 (brs, 2H), 7.16 (t,  $J = 7.8$  Hz, 1.3H), 6.95 (d,  $J = 8.2$  Hz, 1.1H), 6.87 (d,  $J = 6.5$  Hz, 4.3H), 6.82 (t,  $J = 7.4$  Hz, 1.5H), 6.76 (d,  $J = 8.4$  Hz, 2.3H), 6.72 (d,  $J = 7.7$  Hz, 1.1H), 6.69 (d,  $J = 8.6$  Hz, 2.2H), 6.08 (t,  $J = 10.3$  Hz, 0.05H<sub>a</sub> *minor*), 5.93 (t,  $J = 9.9$  Hz, 1H<sub>a</sub> *major*), 5.35 (brs, 1.1H<sub>f</sub>), 5.04 (s, 2.1H<sub>c</sub>), 4.25 (d,  $J = 11.1$  Hz,

1.1H<sub>c</sub> *major*), 3.73 (s, 3.3H<sub>d</sub>), 3.10 (t,  $J = 10.5$  Hz, 1H<sub>b</sub> *major*); **<sup>13</sup>C NMR (150 MHz, CDCl<sub>3</sub>):**  $\delta$  162.8, 161.2, 158.5, 155.5, 154.0, 136.0, 134.6, 134.3, 130.1, 129.8, 129.8, 128.7, 128.4, 128.2, 128.1, 125.9, 121.4, 117.2, 115.8, 115.7, 113.9, 82.0, 67.3, 55.3, 52.4, 50.9; **HRMS (+ESI):** Calc for C<sub>30</sub>H<sub>30</sub>FN<sub>2</sub>O<sub>4</sub> [M+NH<sub>4</sub>]<sup>+</sup> 501.2184; found: 501.2178; Specific rotation of (**3e/3e'**) was found to be  $[\alpha]^{26}_{589} = +134.4$  (c = 0.25 g/100ml, CHCl<sub>3</sub>).

**HPLC:** Chiralpak IC column. Flow rate 1 mL/min. UV detection at 254 nm for major diastereomer;  $\tau(\text{major}) = 14.7$  min.,  $\tau(\text{minor}) = 12.9$  min. using hexane: isopropanol = 90:10 as eluent, ee 84%.

**Benzyl 3-(4-chlorophenyl)-3,4-dihydro-4-(4-methoxyphenyl)-2H-chromen-2-ylcarbamate (3f/3f')**

Compound (**3f/3f'**) was prepared according to the general procedure **5**; **Reaction time:** 3 days; purified by column chromatography using 6-7% (Hexane / EtOAc) solvent system. White solid (19.2 mg, yield: 48%); **mp:** 56-58 °C; **Diastereomeric ratio:** 8.3:1; **<sup>1</sup>H NMR (600 MHz, CDCl<sub>3</sub>):**  $\delta$  7.32 (d,  $J = 6.8$  Hz, 3.3H), 7.20 (d,  $J = 5.8$  Hz, 1.9H), 7.15 (t,  $J = 7.1$  Hz, 3.4H), 6.95 (d,  $J = 8.2$  Hz, 1.2H), 6.85 (d,  $J = 7.7$  Hz, 1.9H), 6.82 (t,  $J = 7.5$  Hz, 1.5H), 6.76 (d,  $J = 8.4$  Hz, 2.3H), 6.71 (d,  $J = 7.8$  Hz, 1.3H), 6.69 (d,  $J = 8.6$  Hz, 2.2H), 6.65 (d,  $J = 8.6$  Hz, 0.3H), 6.51 (d,  $J$

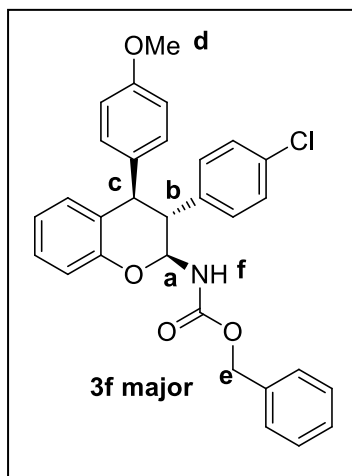

= 8.6 Hz, 0.2H), 6.07 (t,  $J = 10.4$  Hz, 0.12H<sub>a</sub> *minor*), 5.93 (t,  $J = 10.0$  Hz, 1H<sub>a</sub> *major*), 5.28 (d,  $J = 9.3$  Hz, 1H<sub>f</sub>), 5.05 (s, 2.2H<sub>c</sub>), 4.25 (d,  $J = 11.1$  Hz, 1.2H<sub>c</sub>), 3.74 (s, 3.4H<sub>d</sub>), 3.10 (t,  $J = 10.5$  Hz, 1H<sub>b</sub> *major*); <sup>13</sup>C NMR (150 MHz, CDCl<sub>3</sub>): δ 158.6, 155.4, 153.9, 137.5, 136.0, 134.2, 133.1, 130.1, 130.1, 129.7, 129.1, 128.8, 128.5, 128.2, 128.1, 125.9, 121.5, 117.2, 114.0, 81.9, 67.3, 55.4, 52.6, 50.8; **HRMS (+ESI)**: Calc for C<sub>30</sub>H<sub>30</sub>ClN<sub>2</sub>O<sub>4</sub> [M+NH<sub>4</sub>]<sup>+</sup> 517.1889; found: 517.1895.

**HPLC**: Chiralpak IA column. Flow rate 1 mL/min. UV detection at 220 nm for major diastereomer; τ(major) = 50.8 min., τ(minor) =

109.5 min. using hexane: isopropanol = 92:8 as eluent, ee 92%.

**Benzyl 3-(4-bromophenyl)-3,4-dihydro-4-(4-methoxyphenyl)-2H-chromen-2-ylcarbamate (3g/3g')**

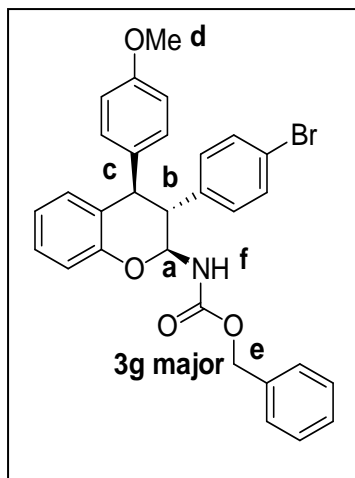

Compound (**3g/3g'**) was prepared according to the general procedure **5**; **Reaction time**: 3 days; purified by column chromatography using 6% (Hexane / EtOAc) solvent system. White amorphous solid (23.1 mg, yield: 53%); **Diastereomeric ratio**: 9:1; <sup>1</sup>H NMR (600 MHz, CDCl<sub>3</sub>): δ 7.30 (d,  $J = 4.9$  Hz, 1H), 7.24 (d,  $J = 8.4$  Hz, 4H), 7.19 (s, 1H), 7.13 (d,  $J = 6.0$  Hz, 2H), 7.08 (t,  $J = 7.6$  Hz, 1H), 6.88 (d,  $J = 8.1$  Hz, 1H), 6.75 (d,  $J = 7.7$  Hz, 1H), 6.74 – 6.71 (m, 2H), 6.69 (d,  $J = 8.5$  Hz, 2H), 6.63 (t,  $J = 9.6$  Hz, 3H), 6.58 (d,  $J = 8.7$  Hz, 1H), 6.45 (d,  $J = 8.6$  Hz, 1H), 6.00 (t,  $J = 10.5$  Hz, 0.11H<sub>a</sub> *minor*), 5.86 (t,  $J = 9.9$  Hz, 1H<sub>a</sub> *major*), 5.25 (d,  $J = 9.9$

Hz, 1H<sub>f</sub>), 4.98 (s, 2.2H<sub>c</sub>), 4.17 (d,  $J = 11.1$  Hz, 1.1H<sub>c</sub>), 3.67 (s, 3.4H<sub>d</sub>), 3.02 (t,  $J = 10.5$  Hz, 1H<sub>b</sub> *major*); <sup>13</sup>C NMR (150 MHz, CDCl<sub>3</sub>): δ 158.6, 155.4, 153.9, 138.0, 136.0, 134.2, 132.0, 130.1, 130.1, 130.0, 128.8, 128.5, 128.2, 128.1, 125.9, 121.5, 121.3, 117.2, 114.0, 81.8, 67.3, 55.4, 52.6, 50.8; **HRMS (+ESI)**: Calc for C<sub>30</sub>H<sub>30</sub>BrN<sub>2</sub>O<sub>4</sub> [M+NH<sub>4</sub>]<sup>+</sup> 561.1383; found: 561.1377.

**HPLC**: Chiralpak IA column. Flow rate 1 mL/min. UV detection at 220 nm for major diastereomer; τ(major) = 57.1 min., τ(minor) = 108.3 min. using hexane: isopropanol = 92:8 up to τ = 45.1 min. thereafter, hexane: isopropanol = 90:10 as eluent, ee 94%.

**Benzyl 3,4-dihydro-4-(4-methoxyphenyl)-3-m-tolyl-2H-chromen-2-ylcarbamate (3h/3h')**

Compound (**3h/3h'**) was prepared according to the general procedure **5**; **Reaction time**: 3 days;

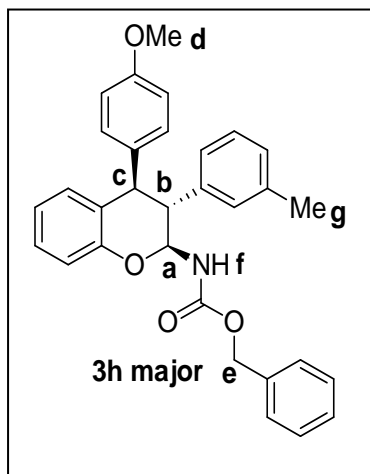

purified by column chromatography using 6% (Hexane / EtOAc) solvent system. Pale yellow solid (26.9 mg, yield: 70%); **mp**: 52–54 °C; **Diastereomeric ratio**: 10:1; **<sup>1</sup>H NMR (600 MHz, CDCl<sub>3</sub>)**: δ 7.30 (brs, 3H), 7.20 (brs, 2H), 7.15 (t, *J* = 7.5 Hz, 1H), 7.07 (t, *J* = 7.7 Hz, 1H), 7.02 (d, *J* = 8.2 Hz, 0.3H), 6.97 (t, *J* = 8.2 Hz, 2H), 6.88 (d, *J* = 7.9 Hz, 0.2H), 6.82 (t, *J* = 7.1 Hz, 1H), 6.78 (d, *J* = 8.5 Hz, 2H), 6.73 (d, *J* = 7.6 Hz, 3H), 6.69 (d, *J* = 8.7 Hz, 2H), 6.63 (d, *J* = 8.6 Hz, 0.3H), 6.50 (d, *J* = 8.6 Hz, 0.3H), 6.10 (t, *J* = 10.3 Hz, 0.1H<sub>a</sub> *minor*), 5.93 (t, *J* = 9.3 Hz, 1H<sub>a</sub> *major*), 5.34 (d, *J* = 8.9

Hz, 1H<sub>f</sub>), 5.04 (dd, *J* = 24.5, 11.5 Hz, 2H<sub>e</sub>), 4.31 (d, *J* = 11.1 Hz, 1H<sub>c</sub> *major*), 4.23 (d, *J* = 5.3 Hz, 0.1H<sub>c</sub> *minor*), 3.73 (s, 3.3H<sub>d</sub>), 3.06 (t, *J* = 10.2 Hz, 1H<sub>b</sub> *major*), 2.23 (s, 3H<sub>g</sub> *major*), 2.19 (s, 0.3H<sub>g</sub> *minor*); **<sup>13</sup>C NMR (150 MHz, CDCl<sub>3</sub>)**: δ 158.4, 155.5, 154.0, 138.7, 138.3, 136.1, 134.8, 131.4, 130.1, 129.0, 128.7, 128.3, 128.1, 128.0, 126.3, 125.4, 124.6, 121.4, 117.2, 113.8, 82.1, 67.2, 55.3, 52.9, 50.6, 21.6; **HRMS (+ESI)**: Calc for C<sub>31</sub>H<sub>30</sub>NO<sub>4</sub> [M+H]<sup>+</sup> 480.2169; found: 480.2170.

**HPLC**: Chiralpak IC column. Flow rate 1 mL/min. UV detection at 274 nm for major diastereomer; τ(major) = 19.0 min., τ(minor) = 14.3 min. using hexane: isopropanol = 90:10 as eluent, ee 92%.

**Benzyl 3-(3-chlorophenyl)-3,4-dihydro-4-(4-methoxyphenyl)-2H-chromen-2-ylcarbamate (3i/3i')**

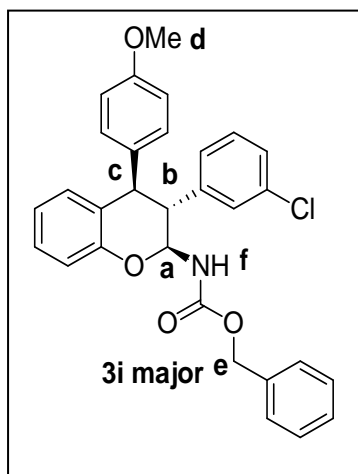

Compound (**3i/3i'**) was prepared according to the general procedure **5**; **Reaction time**: 4 days; purified by column chromatography using 6-7% (Hexane / EtOAc) solvent system. White semi solid (19.2 mg, yield: 48%); **Diastereomeric ratio**: 5:1; **<sup>1</sup>H NMR (600 MHz, CDCl<sub>3</sub>)**: δ 7.32 (d, *J* = 6.9 Hz, 4H), 7.22 (d, *J* = 6.4 Hz, 2H), 7.18 – 7.10 (m, 4H), 7.01 (d, *J* = 8.1 Hz, 0.3H), 6.95 (d, *J* = 8.2 Hz, 1H), 6.92 (s, 1H), 6.82 (dd, *J* = 11.0, 3.9 Hz, 2H), 6.78 (d, *J* = 8.5 Hz, 2H), 6.71 (dd, *J* = 12.7, 8.3 Hz, 3H), 6.65 (d, *J* = 8.6 Hz, 0.4H), 6.52 (d, *J* = 8.5 Hz, 0.3H), 6.07 (t, *J* = 10.3 Hz, 0.2H<sub>a</sub> *minor*), 5.92 (t, *J* = 9.8 Hz, 1H<sub>a</sub> *major*), 5.31 (d, *J* = 9.9



Hz, 1H<sub>f</sub>), 5.06 (brs, 2.1H<sub>e</sub>), 4.28 (d, *J* = 11.0 Hz, 1H<sub>c</sub> major), 4.24 (d, *J* = 5.3 Hz, 0.2H<sub>c</sub> minor), 3.74 (s, 3.6H<sub>d</sub>), 3.10 (t, *J* = 10.4 Hz, 1H<sub>b</sub> major); <sup>13</sup>C NMR (150 MHz, CDCl<sub>3</sub>): δ 158.6, 155.4, 153.9, 141.0, 136.0, 134.6, 134.1, 131.4, 130.1, 130.1, 129.5, 128.7, 128.4, 128.2, 128.2, 127.7, 126.5, 125.8, 121.5, 117.2, 114.0, 81.8, 67.4, 55.4, 52.8, 50.6; **HRMS (+ESI)**: Calc for C<sub>30</sub>H<sub>30</sub>ClN<sub>2</sub>O<sub>4</sub> [M+NH<sub>4</sub>]<sup>+</sup> 517.1889; found: 517.1907.

**HPLC**: Chiralpak IA column. Flow rate 1 mL/min. UV detection at 254 nm for major diastereomer; τ(major) = 29.3 min., τ(minor) = 48.7 min. using hexane: isopropanol = 90:10 as eluent, ee 94%.

**Benzyl 3-(3-bromophenyl)-3,4-dihydro-4-(4-methoxyphenyl)-2H-chromen-2-ylcarbamate (3j/3j')**

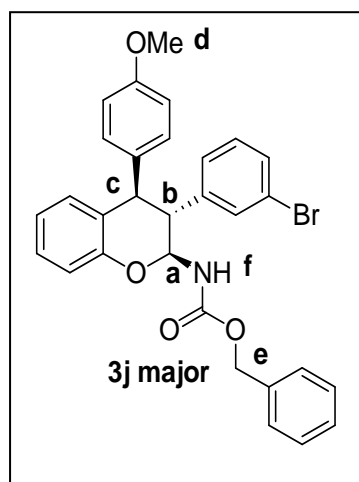

Compound (**3j/3j'**) was prepared according to the general procedure **5**; **Reaction time**: 4 days; purified by column chromatography using 6% (Hexane / EtOAc) solvent system. Yellow white solid (34.8 mg, yield: 80%); **mp**: 64-66 °C; **Diastereomeric ratio**: 20:1; <sup>1</sup>H NMR (600 MHz, CDCl<sub>3</sub>): δ 7.31 (t, *J* = 6.9 Hz, 4H), 7.22 (brs, 2H), 7.16 (t, *J* = 7.6 Hz, 1H), 7.09 – 7.02 (m, 2H), 6.95 (d, *J* = 8.1 Hz, 1H), 6.87 (d, *J* = 6.8 Hz, 1H), 6.82 (t, *J* = 7.4 Hz, 1H), 6.77 (d, *J* = 8.5 Hz, 2H), 6.71 (dd, *J* = 11.7, 8.5 Hz, 3H), 6.08 (t, *J* = 10.3 Hz, 0.03H<sub>a</sub> minor), 5.92 (t, *J* = 9.7 Hz, 1H<sub>a</sub> major), 5.41 (d, *J* = 9.2 Hz, 1H<sub>f</sub>), 5.05 (d, *J* = 6.1 Hz,

2H<sub>e</sub>), 4.27 (d, *J* = 11.0 Hz, 1H<sub>c</sub> major), 4.21 (d, *J* = 5.3 Hz, 0.05H<sub>c</sub> minor), 3.74 (s, 3.1H<sub>d</sub>), 3.09 (t, *J* = 10.6 Hz, 1H<sub>b</sub> major); <sup>13</sup>C NMR (150 MHz, CDCl<sub>3</sub>): δ 158.6, 155.5, 153.9, 141.3, 136.0, 134.1, 131.5, 130.5, 130.4, 130.1, 130.1, 128.7, 128.4, 128.2, 128.1, 126.9, 125.8, 122.8, 121.5, 117.2, 114.0, 81.8, 67.3, 55.4, 52.7, 50.6; **HRMS (+ESI)**: Calc for C<sub>30</sub>H<sub>30</sub>BrN<sub>2</sub>O<sub>4</sub> [M+NH<sub>4</sub>]<sup>+</sup> 561.1383; found: 561.1428.

**HPLC**: Chiralpak IA column. Flow rate 1 mL/min. UV detection at 254 nm for major diastereomer; τ(major) = 30.1 min., τ(minor) = 48.0 min. using hexane: isopropanol = 90:10 as eluent, ee 94%.

**Benzyl 3,4-dihydro-4-(4-methoxyphenyl)-3-*o*-tolyl-2H-chromen-2-ylcarbamate (3k/3k')**

Compound (**3k/3k'**) was prepared according to the general procedure **5**; **Reaction time**: 3 days; purified by column chromatography using 6% (Hexane / EtOAc) solvent system. White

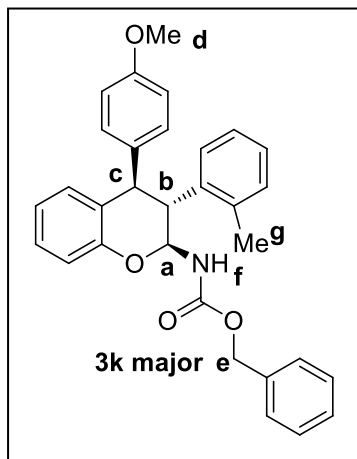

amorphous solid (27.6 mg, yield: 72%); **mp**: 71-73 °C; **Diastereomeric ratio**: 4.2:1; **<sup>1</sup>H NMR (600 MHz, CDCl<sub>3</sub>)**: δ 7.30 (brs, 4H), 7.25 – 7.15 (m, 5H), 7.08 (t, *J* = 8.0 Hz, 1H), 7.03 (d, *J* = 8.3 Hz, 0.3H), 6.98 (t, *J* = 7.5 Hz, 1H), 6.93 (d, *J* = 7.5 Hz, 1H), 6.89 (t, *J* = 7.5 Hz, 0.3H), 6.85 (t, *J* = 7.4 Hz, 1H), 6.80 (d, *J* = 7.6 Hz, 1H), 6.73 (d, *J* = 8.4 Hz, 2H), 6.65 (d, *J* = 8.6 Hz, 2H), 6.60 (d, *J* = 8.5 Hz, 0.5H), 6.45 (d, *J* = 8.3 Hz, 0.5H), 6.14 (t, *J* = 10.1 Hz, 0.2H<sub>a</sub> *minor*), 5.93 (brs, 1H<sub>a</sub> *major*), 5.24 (d, *J* = 7.3 Hz, 1H<sub>f</sub>), 5.01 (dd, *J* = 31.1, 16.0 Hz, 2.4H<sub>e</sub>), 4.34 (d, *J* = 10.6 Hz, 1H<sub>c</sub> *major*),

4.27 (d, *J* = 4.9 Hz, 0.24H<sub>c</sub> *minor*), 3.73 (s, 3H<sub>d</sub> *major*), 3.72 (s, 0.6H<sub>d</sub> *minor*), 3.45 (t, *J* = 9.7 Hz, 1H<sub>b</sub> *major*), 2.42 (s, 0.7H<sub>g</sub> *minor*), 1.73 (s, 3H<sub>g</sub> *major*); **<sup>13</sup>C NMR (100 MHz, CDCl<sub>3</sub>)**: δ 158.5, 158.5, 155.7, 155.5, 154.3, 153.9, 137.5, 136.9, 136.1, 134.7, 132.9, 131.3, 130.4, 130.3, 130.2, 130.1, 128.7, 128.5, 128.3, 128.1, 126.9, 126.8, 126.3, 125.7, 124.6, 121.4, 121.2, 117.3, 117.1, 113.7, 113.1, 82.7, 78.5, 67.2, 55.3, 51.2, 47.5, 45.9, 44.0, 19.8, 19.7; **HRMS (+ESI)**: Calc for C<sub>31</sub>H<sub>30</sub>NO<sub>4</sub> [M+H]<sup>+</sup> 480.2169; found: 480.2189.

**HPLC**: Chiralpak IA column. Flow rate 1 mL/min. UV detection at 220 nm for major diastereomer; τ(major) = 38.0 min., τ(minor) = 73.6 min. using hexane: isopropanol = 95:5 as eluent, ee 88%.

#### ***Benzyl 3-(2-fluorophenyl)-3,4-dihydro-4-(4-methoxyphenyl)-2H-chromen-2-ylcarbamate (3l)***

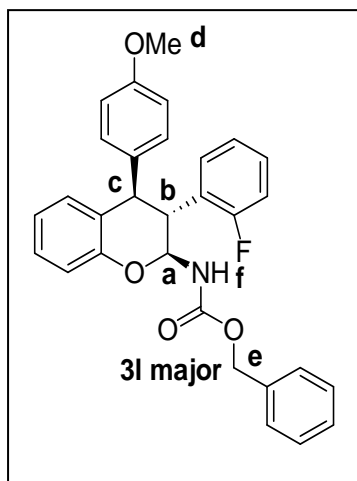

Compound **(3l)** was prepared according to the general procedure **5**; **Reaction time**: 3 days; purified by column chromatography using 7% (Hexane / EtOAc) solvent system. White solid (32.1 mg, yield: 83%); **mp**: 60-62 °C; **Diastereomeric ratio**: >20:1; **<sup>1</sup>H NMR (600 MHz, CDCl<sub>3</sub>)**: δ 7.31 (d, *J* = 6.0 Hz, 3H), 7.21 (d, *J* = 5.9 Hz, 2H), 7.15 (dd, *J* = 14.6, 7.7 Hz, 2H), 7.09 (brs, 1H), 7.03 (t, *J* = 7.0 Hz, 1H), 6.96 (d, *J* = 8.1 Hz, 1H), 6.90 (t, *J* = 9.3 Hz, 1H), 6.86 (d, *J* = 8.2 Hz, 2H), 6.82 (t, *J* = 7.5 Hz, 1H), 6.72 (d, *J* = 7.7 Hz, 1H), 6.69 (d, *J* = 8.5 Hz, 2H), 6.01 (t, *J* = 9.9 Hz, 1H<sub>a</sub> *major*), 5.47 (d, *J* = 8.8 Hz, 1H<sub>f</sub>), 5.07 (d, *J* = 12.3 Hz, 1H<sub>e</sub>), 5.01 (d, *J* = 12.3 Hz, 1H<sub>e</sub>),

4.46 (d, *J* = 11.3 Hz, 1H<sub>c</sub> *major*), 3.73 (s, 3H<sub>d</sub> *major*), 3.58 (t, *J* = 10.6 Hz, 1H<sub>b</sub> *major*); **<sup>13</sup>C NMR (150 MHz, CDCl<sub>3</sub>)**: δ 161.9, 160.3, 158.5, 155.5, 153.9, 136.1, 134.1, 130.0, 130.0, 128.9,

128.9, 128.7, 128.3, 128.2, 128.1, 125.89, 124.7, 121.4, 117.2, 115.7, 115.6, 113.9, 81.7, 67.2, 55.3, 48.7, 32.1; **HRMS (+ESI)**: Calc for C<sub>30</sub>H<sub>30</sub>FN<sub>2</sub>O<sub>4</sub> [M+NH<sub>4</sub>]<sup>+</sup> 501.2184; found: 501.2187; Specific rotation of (**3l**) was found to be  $[\alpha]_{589}^{25} = +87.2$  (c = 0.25 g/100ml, CHCl<sub>3</sub>).

**HPLC**: Chiralpak IA column. Flow rate 1 mL/min. UV detection at 220 nm for major diastereomer;  $\tau$ (major) = 28.4 min.,  $\tau$ (minor) = 56.7 min. using hexane: isopropanol = 90:10 as eluent, ee 94%.

**Benzyl 3-(2-chlorophenyl)-3,4-dihydro-4-(4-methoxyphenyl)-2H-chromen-2-ylcarbamate (3m)**

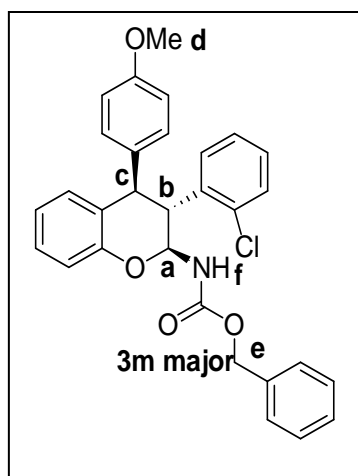

Compound (**3m**) was prepared according to the general procedure **5**; **Reaction time**: 3 days; purified by column chromatography using 6% (Hexane / EtOAc) solvent system. White solid (35.2 mg, yield: 88%); **mp**: 70-72 °C; **Diastereomeric ratio**: >20:1; **<sup>1</sup>H NMR (600 MHz, CDCl<sub>3</sub>)**:  $\delta$  7.31 (d, *J* = 6.5 Hz, 5H), 7.21 (d, *J* = 5.3 Hz, 3H), 7.17 (t, *J* = 7.7 Hz, 1H), 7.10 (t, *J* = 8.3 Hz, 1H), 6.97 (d, *J* = 8.1 Hz, 1H), 6.88 (d, *J* = 8.0 Hz, 2H), 6.83 (t, *J* = 7.4 Hz, 1H), 6.73 (d, *J* = 7.6 Hz, 1H), 6.69 (d, *J* = 8.5 Hz, 2H), 5.89 (brs, 1H<sub>a</sub> major), 5.50 (d, *J* = 8.4 Hz, 1H<sub>f</sub> major), 5.03 (dd, *J* = 41.7, 12.3 Hz, 2H<sub>e</sub>

major), 4.40 (brs, 1H<sub>c</sub> major), 4.03 (brs, 1H<sub>b</sub> major), 3.73 (s, 3H<sub>d</sub> major); **<sup>13</sup>C NMR (150 MHz, CDCl<sub>3</sub>)**:  $\delta$  158.6, 155.5, 153.8, 136.5, 136.1, 133.4, 130.2, 129.9, 129.7, 128.7, 128.4, 128.3, 128.2, 128.1, 127.7, 126.0, 121.4, 117.2, 113.9, 82.7, 67.2, 55.3, 49.5, 46.6; **HRMS (+ESI)**: Calc for C<sub>30</sub>H<sub>27</sub>ClNO<sub>4</sub> [M+H]<sup>+</sup> 500.1623; found: 500.1604; Specific rotation of (**3m**) was found to be  $[\alpha]_{589}^{28} = +68.8$  (c = 0.25 g/100ml, CHCl<sub>3</sub>).

**HPLC**: Chiralpak IA column. Flow rate 1 mL/min. UV detection at 220 nm for major diastereomer;  $\tau$ (major) = 19.6 min.,  $\tau$ (minor) = 65.3 min. using hexane: isopropanol = 90:10 as eluent, ee 94%.

**Benzyl 3-(2-bromophenyl)-3,4-dihydro-4-(4-methoxyphenyl)-2H-chromen-2-ylcarbamate (3n)**

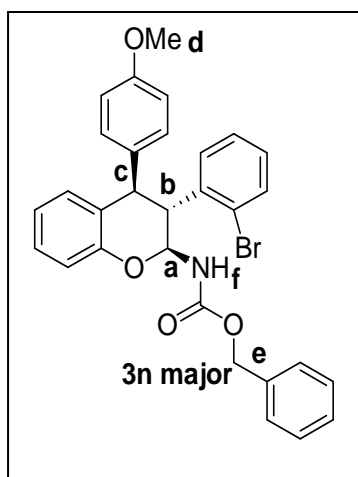

Compound (**3n**) was prepared according to the general procedure **5**; **Reaction time**: 3 days; purified by column chromatography using 6% (Hexane / EtOAc) solvent system. White solid (38.8 mg, yield: 89%); **mp**: 72-74 °C; **Diastereomeric ratio**: >20:1; **<sup>1</sup>H NMR (600 MHz, CDCl<sub>3</sub>)**:  $\delta$  7.38 (d, *J* = 7.6 Hz, 1H), 7.34 – 7.29 (m, 5H), 7.21 (d, *J* = 5.7 Hz, 2H), 7.17 (t, *J* = 7.5 Hz, 1H), 7.03 (t, *J* =

8.4 Hz, 1H), 6.97 (d,  $J = 8.1$  Hz, 1H), 6.89 (d,  $J = 7.9$  Hz, 2H), 6.83 (t,  $J = 7.4$  Hz, 1H), 6.73 (d,  $J = 7.6$  Hz, 1H), 6.69 (d,  $J = 8.4$  Hz, 2H), 5.88 (t,  $J = 9.4$  Hz, 1H<sub>a major</sub>), 5.54 (d,  $J = 9.6$  Hz, 1H<sub>f major</sub>), 5.07 (d,  $J = 12.3$  Hz, 1H<sub>e major</sub>), 4.99 (d,  $J = 12.3$  Hz, 1H<sub>e major</sub>), 4.40 (d,  $J = 10.7$  Hz, 1H<sub>c major</sub>), 4.04 (t,  $J = 10.0$  Hz, 1H<sub>b major</sub>), 3.73 (s, 3H<sub>d major</sub>); <sup>13</sup>C NMR (150 MHz, CDCl<sub>3</sub>):  $\delta$  158.6, 155.5, 153.7, 138.2, 136.1, 133.2, 133.0, 130.3, 129.9, 128.7, 128.7, 128.4, 128.3, 128.2, 128.1, 126.4, 126.0, 121.4, 117.1, 113.9, 82.8, 67.2, 55.3, 49.7, 49.3; **HRMS (+ESI)**: Calc for C<sub>30</sub>H<sub>27</sub>BrNO<sub>4</sub> [M+H]<sup>+</sup> 544.1118; found: 544.1148; Specific rotation of (**3n**) was found to be  $[\alpha]_{589}^{28} = +64.0$  ( $c = 0.25$  g/100ml, CHCl<sub>3</sub>).

**HPLC**: Chiralpak IB column. Flow rate 1 mL/min. UV detection at 220 nm for major diastereomer;  $\tau$ (major) = 10.6 min.,  $\tau$ (minor) = 16.8 min. using hexane: isopropanol = 90:10 as eluent, ee 94%.

**Benzyl 3,4-dihydro-4-(4-methoxyphenyl)-3-(2,4-dimethylphenyl)-2H-chromen-2-ylcarbamate (3o/3o')**

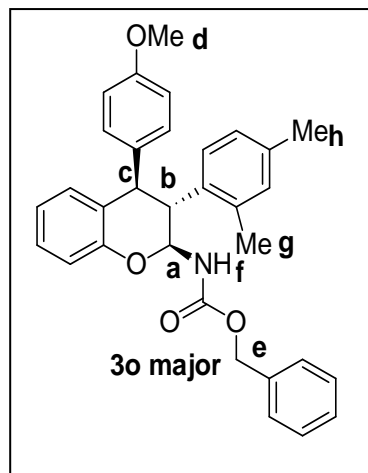

Compound (**3o/3o'**) was prepared according to the general procedure **5**; **Reaction time**: 3 days; purified by column chromatography using 6% (Hexane / EtOAc) solvent system. White solid (24.9 mg, yield: 63%); **mp**: 95-97 °C; **Diastereomeric ratio**: 4.3:1; <sup>1</sup>H NMR (600 MHz, CDCl<sub>3</sub>):  $\delta$  7.30 (brs, 4H), 7.24 – 7.19 (m, 2H), 7.17 (t,  $J = 7.7$  Hz, 1H), 7.10 (s, 1H), 7.02 (d,  $J = 8.0$  Hz, 1H), 7.00 – 6.96 (m, 2H), 6.88 (t,  $J = 7.3$  Hz, 0.3H), 6.84 (t,  $J = 7.4$  Hz, 1H), 6.78 (d,  $J = 7.6$  Hz, 1H), 6.74 (d,  $J = 8.3$  Hz, 3H), 6.66 (d,  $J = 8.6$  Hz, 2H), 6.61 (d,  $J = 8.6$  Hz,

1H), 6.46 (d,  $J = 8.4$  Hz, 0.5H), 6.11 (t,  $J = 10.1$  Hz, 0.2H<sub>a minor</sub>), 5.89 (brs, 1H<sub>a major</sub>), 5.21 (brs, 1H<sub>f</sub>), 5.03 (dd,  $J = 46.0, 9.0$  Hz, 2.5H<sub>e</sub>), 4.31 (d,  $J = 10.4$  Hz, 1H<sub>c major</sub>), 4.25 (d,  $J = 4.9$  Hz, 0.23H<sub>c minor</sub>), 3.73 (s, 3.7H<sub>d</sub>), 3.40 (t,  $J = 9.7$  Hz, 1H<sub>b major</sub>), 2.37 (s, 0.6H<sub>g minor</sub>), 2.25 (s, 3.7H<sub>h</sub>), 1.69 (s, 3H<sub>g major</sub>); <sup>13</sup>C NMR (150 MHz, CDCl<sub>3</sub>):  $\delta$  158.5, 158.5, 155.5, 154.3, 154.0, 136.6, 136.2, 134.9, 134.4, 133.0, 131.4, 131.1, 130.2, 130.2, 128.7, 128.4, 128.3, 128.0, 127.7, 126.4, 124.7, 121.4, 121.1, 117.3, 117.1, 113.7, 113.2, 82.7, 78.6, 67.2, 60.6, 55.3, 51.2, 46.0, 43.8, 21.2, 21.1, 19.7, 19.6; **HRMS (+ESI)**: Calc for C<sub>32</sub>H<sub>32</sub>NO<sub>4</sub> [M+H]<sup>+</sup> 494.2326; found: 494.2324.

**HPLC:** Chiralpak IC column. Flow rate 1 mL/min. UV detection at 254 nm for major diastereomer;  $\tau(\text{major}) = 24.1$  min.,  $\tau(\text{minor}) = 22.5$  min. using hexane: isopropanol = 92:8 as eluent, ee 92%.

*S*-benzyl ***N*-3,4-dihydro-4-(4-methoxyphenyl)-3-phenyl-2*H*-chromen-2-ylcarbamoithioate (3*p*/3*p'*)**

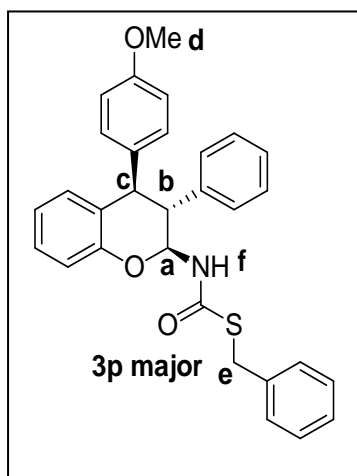

Compound (**3*p*/3*p'***) was prepared according to the general procedure **5**; **Reaction time:** 3 days; purified by column chromatography using 6% (Hexane / EtOAc) solvent system. White solid (28.5 mg, yield: 74%); **mp:** 79-81 °C; **Diastereomeric ratio:** 20:1; **<sup>1</sup>H NMR (600 MHz, CDCl<sub>3</sub>):**  $\delta$  7.27 (d,  $J = 7.0$  Hz, 1H), 7.25 (brs, 1H), 7.24 – 7.14 (m, 7H), 6.96 (d,  $J = 8.1$  Hz, 1H), 6.93 (d,  $J = 6.1$  Hz, 2H), 6.83 (t,  $J = 7.5$  Hz, 1H), 6.78 (d,  $J = 8.6$  Hz, 2H), 6.74 (d,  $J = 7.7$  Hz, 1H), 6.69 (d,  $J = 8.7$  Hz, 2H), 6.13 (brs, 1H<sub>a</sub> major), 5.88 (d,  $J = 8.8$  Hz, 1H<sub>f</sub> major), 4.31 (d,  $J = 10.9$

Hz, 1H<sub>c</sub> major), 4.24 (d,  $J = 5.2$  Hz, 0.1H<sub>c</sub> minor), 4.10 (brs, 2.1H<sub>e</sub>), 3.73 (s, 3.2H<sub>d</sub>), 3.12 (t,  $J = 10.4$  Hz, 1H<sub>b</sub> major); **<sup>13</sup>C NMR (100 MHz, CDCl<sub>3</sub>):**  $\delta$  168.1, 158.4, 153.8, 138.4, 137.7, 134.5, 131.3, 130.1, 129.0, 128.8, 128.7, 128.3, 128.1, 127.4, 126.0, 121.5, 117.2, 113.9, 113.3, 80.8, 55.3, 52.8, 50.4, 34.3, 29.9; **HRMS (+ESI):** Calc for C<sub>30</sub>H<sub>28</sub>NO<sub>3</sub>S [M+H]<sup>+</sup> 482.1784; found: 482.1780; Specific rotation of (**3*p*/3*p'***) was found to be  $[\alpha]_{589}^{29} = +111.2$  ( $c = 0.25$  g/100ml, CHCl<sub>3</sub>).

**HPLC:** Chiralpak IA column. Flow rate 1 mL/min. UV detection at 220 nm for major diastereomer;  $\tau(\text{major}) = 32.4$  min.,  $\tau(\text{minor}) = 57.1$  min. using hexane: isopropanol = 90:10 as eluent, ee 95%.

*tert*-butyl ***N*-3,4-dihydro-4-(4-methoxyphenyl)-3-phenyl-2*H*-chromen-2-ylcarbamate (3*q*/3*q'*)**

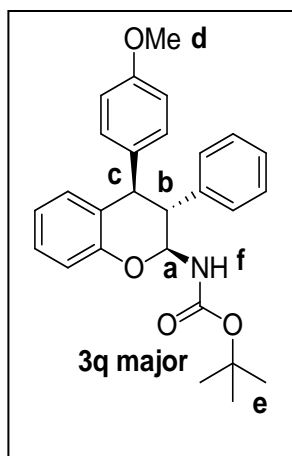

Compound (**3*q*/3*q'***) was prepared according to the general procedure **5**; **Reaction time:** 3 days; purified by column chromatography using 6-7% (Hexane / EtOAc) solvent system. White amorphous solid (26.9 mg, yield: 78%); **mp:** 55-57 °C; **Diastereomeric ratio:** 1.5:1; **<sup>1</sup>H NMR (600 MHz, CDCl<sub>3</sub>):**  $\delta$  7.21 – 7.13 (m, 7H), 7.02 (d,  $J = 8.2$  Hz, 1H), 6.96 (d,  $J = 8.1$  Hz, 1H), 6.93 (d,  $J = 7.2$  Hz, 3H), 6.86 (t,  $J = 7.3$  Hz,

1H), 6.81 (d,  $J = 7.4$  Hz, 1H), 6.78 (d,  $J = 8.5$  Hz, 2H), 6.72 (d,  $J = 6.9$  Hz, 2H), 6.68 (d,  $J = 8.5$  Hz, 2H), 6.60 (d,  $J = 8.1$  Hz, 1H), 6.48 (d,  $J = 8.0$  Hz, 1H), 6.09 (t,  $J = 10.4$  Hz, 0.7H<sub>a</sub> minor), 5.90 (brs, 1H<sub>a</sub> major), 5.07 (dd,  $J = 17.9, 9.1$  Hz, 2H<sub>f</sub>), 4.30 (d,  $J = 11.1$  Hz, 1H<sub>c</sub> major), 4.24 (d,  $J = 5.3$  Hz, 0.7H<sub>c</sub> minor), 3.73 (s, 3H<sub>d</sub> major), 3.72 (s, 2H<sub>d</sub> minor), 3.47 (t,  $J = 4.8$  Hz, 0.7H<sub>b</sub> minor), 3.08 (t,  $J = 9.9$  Hz, 1H<sub>b</sub> major), 1.36 (s, 6H<sub>e</sub> minor), 1.33 (s, 9H<sub>e</sub> major); **<sup>13</sup>C NMR (150 MHz, CDCl<sub>3</sub>):**  $\delta$  158.5, 158.4, 155.0, 154.6, 154.2, 154.0, 139.0, 138.1, 134.8, 132.7, 131.3, 130.2, 130.1, 130.0, 129.2, 128.7, 128.5, 128.4, 128.2, 128.0, 127.2, 127.1, 126.2, 124.6, 121.2, 121.0, 117.2, 117.1, 113.8, 113.3, 81.9, 80.6, 77.8, 55.3, 55.3, 53.2, 53.2, 50.8, 48.8, 28.4, 28.3; **HRMS (+ESI):** Calc for C<sub>27</sub>H<sub>30</sub>NO<sub>4</sub> [M+H]<sup>+</sup> 432.2169; found: 432.2167.

**HPLC:** Chiralpak IA column. Flow rate 1 mL/min. UV detection at 220 nm for major diastereomer;  $\tau$ (major) = 17.4 min.,  $\tau$ (minor) = 27.6 min. using hexane: isopropanol = 92:8 as eluent, ee 90%.

**Allyl 3,4-dihydro-4-(4-methoxyphenyl)-3-phenyl-2H-chromen-2-ylcarbamate (3r/3r')**

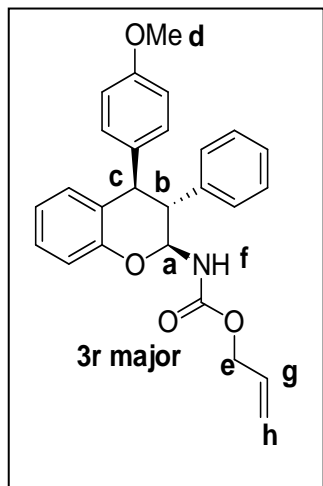

Compound (**3r/3r'**) was prepared according to the general procedure **5**; **Reaction time:** 3 days; purified by column chromatography using 6% (Hexane / EtOAc) solvent system. White semi solid (20.3 mg, yield: 61%); **Diastereomeric ratio:** 6.7:1; **<sup>1</sup>H NMR (600 MHz, CDCl<sub>3</sub>):**  $\delta$  7.24 – 7.12 (m, 5H), 6.96 (d,  $J = 8.1$  Hz, 1H), 6.93 (d,  $J = 6.8$  Hz, 2H), 6.81 (t,  $J = 7.1$  Hz, 1H), 6.77 (d,  $J = 8.4$  Hz, 2H), 6.73 (d,  $J = 7.3$  Hz, 1H), 6.68 (d,  $J = 8.4$  Hz, 2H), 6.61 (d,  $J = 7.7$  Hz, 0.3H), 6.49 (d,  $J = 7.8$  Hz, 0.3H), 6.11 (t,  $J = 9.7$  Hz, 0.1H<sub>a</sub> minor), 5.94 (brs, 1H<sub>a</sub> major), 5.80 (brs, 1H<sub>g</sub>), 5.27 (brs, 1H<sub>f</sub>), 5.13 (d,  $J = 12.3$  Hz, 2H<sub>h</sub>), 4.50 (d,  $J = 23.1$  Hz, 2H<sub>e</sub>), 4.31 (d,  $J = 11.0$  Hz, 1H<sub>c</sub> major), 4.25 (d,  $J = 4.5$  Hz, 0.2H<sub>c</sub> minor), 3.73 (s, 3.3H<sub>d</sub>), 3.10 (t,  $J = 9.2$  Hz, 1H<sub>b</sub> major); **<sup>13</sup>C NMR (150 MHz, CDCl<sub>3</sub>):**  $\delta$  158.4, 155.4, 154.0, 138.8, 134.6, 132.5, 131.4, 130.1, 129.2, 128.9, 128.3, 128.1, 127.3, 126.2, 121.4, 118.0, 117.2, 113.9, 113.3, 82.0, 66.1, 55.3, 53.0, 50.8; **HRMS (+ESI):** Calc for C<sub>26</sub>H<sub>26</sub>NO<sub>4</sub> [M+H]<sup>+</sup> 416.1856; found: 416.1890.

**HPLC:** Chiralpak IC column. Flow rate 1 mL/min. UV detection at 220 nm for major diastereomer;  $\tau$ (major) = 28.6 min.,  $\tau$ (minor) = 22.1 min. using hexane: isopropanol = 95:5 as eluent, ee 90%.

**Prop-2-ynyl 3,4-dihydro-4-(4-methoxyphenyl)-3-phenyl-2H-chromen-2-ylcarbamate (3s/3s')**

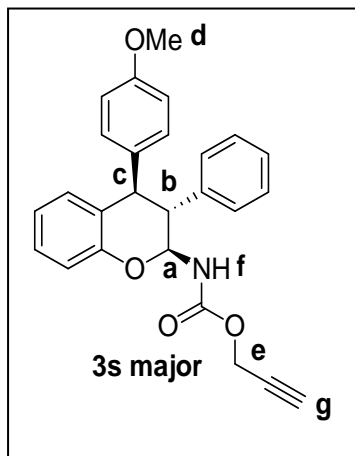

Compound (**3s/3s'**) was prepared according to the general procedure **5**; **Reaction time**: 3 days; purified by column chromatography using 7% (Hexane / EtOAc) solvent system. White semi solid (29.4 mg, yield: 89%); **Diastereomeric ratio**: 12.5:1; **<sup>1</sup>H NMR (600 MHz, CDCl<sub>3</sub>)**:  $\delta$  7.23 – 7.12 (m, 4H), 6.95 (d,  $J$  = 8.1 Hz, 1H), 6.92 (d,  $J$  = 6.9 Hz, 2H), 6.82 (t,  $J$  = 7.4 Hz, 1H), 6.77 (d,  $J$  = 8.6 Hz, 2H), 6.73 (d,  $J$  = 7.6 Hz, 1H), 6.68 (d,  $J$  = 8.7 Hz, 2H), 6.09 (t,  $J$  = 10.3 Hz, 0.1H<sub>a</sub> *minor*), 5.92 (t,  $J$  = 9.8 Hz, 1H<sub>a</sub> *major*), 5.41 (brs, 1H<sub>f</sub>), 4.60 (dd,  $J$  = 57.5, 15.5 Hz, 2.1H<sub>c</sub>), 4.31 (d,  $J$  = 11.1 Hz, 1H<sub>c</sub> *major*), 4.24 (d,  $J$  = 5.3 Hz, 0.1H<sub>c</sub> *minor*), 3.72 (s,

3.2H<sub>d</sub>), 3.11 (t,  $J$  = 10.4 Hz, 1H<sub>b</sub> *major*), 2.42 (s, 1H<sub>g</sub> *major*); **<sup>13</sup>C NMR (150 MHz, CDCl<sub>3</sub>)**:  $\delta$  158.5, 154.7, 153.9, 138.7, 134.6, 131.4, 130.1, 128.9, 128.3, 128.1, 127.4, 126.1, 121.4, 117.2, 113.9, 113.3, 82.0, 77.8, 75.2, 55.3, 53.1, 52.9, 50.7; **HRMS (+ESI)**: Calc for C<sub>26</sub>H<sub>24</sub>NO<sub>4</sub> [M+H]<sup>+</sup> 414.170; found: 414.1693.

**HPLC**: Chiralpak IC column. Flow rate 1 mL/min. UV detection at 220nm for major diastereomer;  $\tau$ (major) = 17.4 min.,  $\tau$ (minor) = 12.7 min. using hexane: isopropanol = 90:10 as eluent, ee 90%.

**Benzyl 6-bromo-3,4-dihydro-4-(4-methoxyphenyl)-3-phenyl-2H-chromen-2-ylcarbamate (3t/3t')**

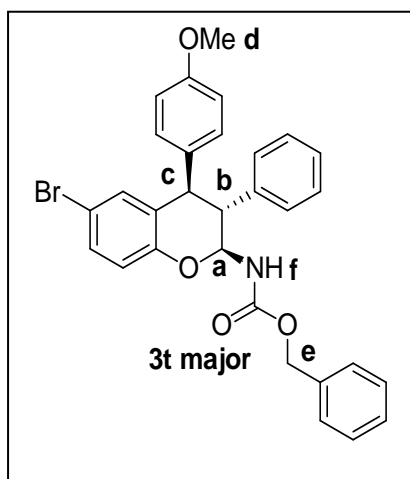

Compound (**3t/3t'**) was prepared according to the general procedure **5**; **Reaction time**: 3 days; purified by column chromatography using 6-7% (Hexane / EtOAc) solvent system. White semi solid (37.5 mg, yield: 86%); **Diastereomeric ratio**: 2.6:1; **<sup>1</sup>H NMR (600 MHz, CDCl<sub>3</sub>)**:  $\delta$  7.29 (brs, 5H), 7.26 – 7.11 (m, 8H), 7.08 (s, 0.4H), 6.90 (brs, 2H), 6.84 (d,  $J$  = 8.0 Hz, 2H), 6.75 (d,  $J$  = 8.4 Hz, 2H), 6.69 (d,  $J$  = 8.5 Hz, 2H), 6.63 (d,  $J$  = 8.6 Hz, 1H), 6.48 (d,  $J$  = 8.5 Hz, 1H), 6.11 (t,  $J$  = 10.1 Hz, 0.3H<sub>a</sub> *minor*), 5.93 (t,  $J$  = 8.6 Hz, 1H<sub>a</sub> *major*), 5.34

(brs, 1.1H<sub>f</sub>), 5.03 (d,  $J$  = 20.1 Hz, 2.6H<sub>e</sub>), 4.25 (d,  $J$  = 11.0 Hz, 1H<sub>c</sub> *major*), 4.19 (d,  $J$  = 5.2 Hz, 0.38H<sub>c</sub> *minor*), 3.74 (s, 4.1H<sub>d</sub>), 3.08 (t,  $J$  = 10.1 Hz, 1H<sub>b</sub> *major*); **<sup>13</sup>C NMR (150 MHz, CDCl<sub>3</sub>)**:  $\delta$

158.8, 158.7, 155.5, 155.4, 153.2, 153.0, 138.4, 136.1, 133.7, 132.6, 131.9, 131.5, 131.3, 131.1, 130.1, 129.1, 128.9, 128.7, 128.4, 128.4, 128.3, 128.1, 127.5, 127.4, 126.7, 119.1, 118.9, 114.2, 113.6, 113.5, 113.3, 82.4, 67.4, 67.3, 55.4, 55.3, 52.6, 50.6, 48.5, 48.4; **HRMS (+ESI)**: Calc for  $C_{30}H_{27}BrNO_4$   $[M+H]^+$  544.1118; found: 544.1101.

**HPLC**: Chiralpak IA column. Flow rate 1 mL/min. UV detection at 220 nm for major diastereomer;  $\tau$ (major) = 41.7 min.,  $\tau$ (minor) = 62.4 min. using hexane: isopropanol = 90:10 as eluent, ee 84%.

**Benzyl 6,8-dichloro-3,4-dihydro-4-(4-methoxyphenyl)-3-phenyl-2H-chromen-2-ylcarbamate (3u/3u')**

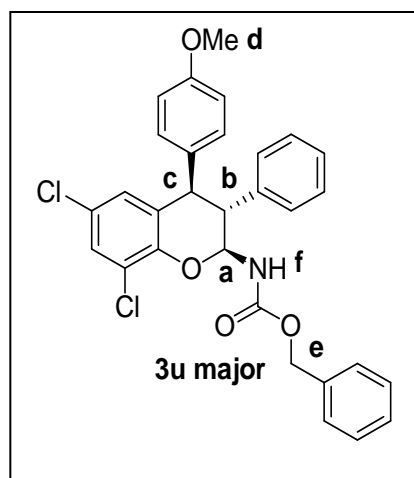

Compound (**3u/3u'**) was prepared according to the general procedure **5**; **Reaction time**: 6 days; purified by column chromatography using 6% (Hexane / EtOAc) solvent system. White semi solid (12.8 mg, yield: 30%); **Diastereomeric ratio**: >20:1;  **$^1H$  NMR (600 MHz,  $CDCl_3$ )**:  $\delta$  7.29 (brs, 3H), 7.24 (d,  $J = 1.8$  Hz, 1H), 7.18 (brs, 5H), 6.89 (brs, 2H), 6.74 (d,  $J = 8.4$  Hz, 2H), 6.69 (d,  $J = 8.5$  Hz, 2H), 6.61 (s, 1H), 6.18 (brs, 0.03H<sub>a</sub> minor), 6.00 (t,  $J = 8.9$  Hz, 1H<sub>a</sub> major), 5.36 (d,  $J = 8.5$  Hz, 1H<sub>f</sub> major), 5.05 (s, 2H<sub>e</sub> major), 4.27 (d,  $J = 11.1$  Hz, 1H<sub>c</sub> major), 3.74 (s, 3H<sub>d</sub> major), 3.12 (t,  $J = 10.1$  Hz, 1H<sub>b</sub>

major);  **$^{13}C$  NMR (150 MHz,  $CDCl_3$ )**:  $\delta$  158.8, 155.4, 148.8, 139.5, 137.9, 136.0, 133.1, 130.1, 129.3, 129.0, 128.7, 128.5, 128.4, 128.3, 128.0, 127.6, 125.9, 122.9, 114.2, 83.1, 67.4, 55.4, 52.4, 51.0; **HRMS (+ESI)**: Calc for  $C_{30}H_{26}Cl_2NO_4$   $[M+H]^+$  534.1233; found: 534.1232; Specific rotation of (**3u/3u'**) was found to be  $[\alpha]_{589}^{27} = +106.0$  ( $c = 0.10$  g/100ml,  $CHCl_3$ ).

**HPLC**: Chiralpak IA column. Flow rate 1 mL/min. UV detection at 220 nm for major diastereomer;  $\tau$ (major) = 40.4 min.,  $\tau$ (minor) = 70.8 min. using hexane: isopropanol = 93:7 as eluent, ee 88%.

**Benzyl 6,8-dibromo-3,4-dihydro-4-(4-methoxyphenyl)-3-phenyl-2H-chromen-2-ylcarbamate (3v/3v')**

Compound (**3v/3v'**) was prepared according to the general procedure **5**; **Reaction time**: 3 days; **Temperature**: 50 °C; purified by column chromatography using 6% (Hexane / EtOAc) solvent system. White solid (16.5 mg, yield: 33%); **mp**: 66-68 °C; **Diastereomeric ratio**: 11:1;  **$^1H$  NMR**



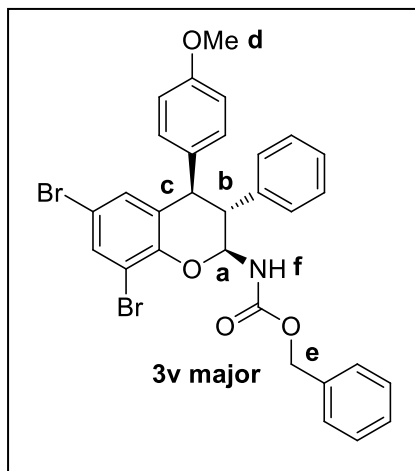

(**600 MHz, CDCl<sub>3</sub>**):  $\delta$  7.54 (d,  $J = 1.8$  Hz, 1H), 7.29 (brs, 3H), 7.18 (brs, 5H), 6.89 (brs, 2H), 6.79 (s, 1H), 6.73 (d,  $J = 8.5$  Hz, 2H), 6.69 (d,  $J = 8.6$  Hz, 2H), 6.18 (t,  $J = 10.8$  Hz, 0.1H<sub>a</sub> *minor*), 5.99 (brs, 1H<sub>a</sub> *major*), 5.34 (brs, 1H<sub>f</sub>), 5.07 (d,  $J = 11.9$  Hz, 2H<sub>e</sub>), 4.28 (d,  $J = 10.7$  Hz, 1H<sub>c</sub> *major*), 4.21 (d,  $J = 5.1$  Hz, 0.1H<sub>c</sub> *minor*), 3.74 (s, 3.1H<sub>d</sub>), 3.11 (t,  $J = 9.8$  Hz, 1H<sub>b</sub> *major*); **<sup>13</sup>C NMR (150 MHz, CDCl<sub>3</sub>)**:  $\delta$  158.9, 155.3, 150.2, 139.5, 137.9, 136.1, 134.1, 133.2, 131.9, 131.3, 130.1, 129.7, 129.0, 128.7, 128.4, 128.3, 128.0, 127.7, 114.3, 113.6, 113.4, 112.2,

83.4, 67.4, 55.4, 52.6, 50.9; **HRMS (+ESI)**: Calc for C<sub>30</sub>H<sub>26</sub>Br<sub>2</sub>NO<sub>4</sub> [M+H]<sup>+</sup> 622.0223; found: 622.0226.

**HPLC**: Chiralpak IA column. Flow rate 1 mL/min. UV detection at 220 nm for major diastereomer;  $\tau$ (major) = 19.9 min.,  $\tau$ (minor) = 48.6 min. using hexane: isopropanol = 88:12 as eluent, ee 92%.

***Benzyl 3,4-dihydro-3,4-diphenyl-2H-chromen-2-ylcarbamate (3w/3w')***

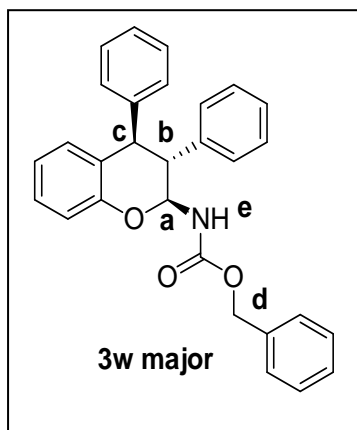

Compound (**3w/3w'**) was prepared according to the general procedure **5**; **Reaction time**: 3 days; purified by column chromatography using 5% (Hexane / EtOAc) solvent system. White solid (13.2 mg, yield: 38%); **mp**: 95-97 °C; **Diastereomeric ratio**: 14.3:1; **<sup>1</sup>H NMR (600 MHz, CDCl<sub>3</sub>)**:  $\delta$  7.30 (brs, 3H), 7.18 (brs, 5H), 7.14 (d,  $J = 4.1$  Hz, 4H), 7.08 (t,  $J = 7.4$  Hz, 0.2H), 7.03 (d,  $J = 8.2$  Hz, 0.1H), 6.98 (d,  $J = 8.2$  Hz, 1H), 6.92 (d,  $J = 4.9$  Hz, 2H), 6.86 (d,  $J = 3.9$  Hz, 2H), 6.82 (t,  $J = 7.4$  Hz, 1H), 6.72 (d,  $J = 7.6$  Hz, 1H), 6.67 (d,  $J = 6.9$  Hz, 0.1H), 6.60 (d,  $J = 7.5$  Hz, 0.2H),

6.16 (t,  $J = 10.2$  Hz, 0.1H<sub>a</sub> *minor*), 5.98 (t,  $J = 9.4$  Hz, 1H<sub>a</sub> *major*), 5.33 (d,  $J = 8.7$  Hz, 1H<sub>e</sub>), 5.04 (dd,  $J = 29.0, 12.0$  Hz, 2H<sub>d</sub>), 4.37 (d,  $J = 11.0$  Hz, 1H<sub>c</sub> *major*), 4.30 (d,  $J = 5.4$  Hz, 0.07H<sub>c</sub> *minor*), 3.15 (t,  $J = 10.2$  Hz, 1H<sub>b</sub> *major*); **<sup>13</sup>C NMR (150 MHz, CDCl<sub>3</sub>)**:  $\delta$  155.5, 154.1, 142.6, 139.5, 138.6, 136.1, 130.4, 130.2, 129.2, 128.9, 128.7, 128.5, 128.3, 128.2, 128.1, 127.4, 126.9, 125.9, 121.4, 117.2, 114.3, 82.1, 67.2, 53.0, 51.6; **HRMS (+ESI)**: Calc for C<sub>29</sub>H<sub>26</sub>NO<sub>3</sub> [M+H]<sup>+</sup> 436.1907; found: 436.1909.

**HPLC:** Chiralpak IC column. Flow rate 1 mL/min. UV detection at 220 nm for major diastereomer;  $\tau(\text{major}) = 17.0$  min.,  $\tau(\text{minor}) = 14.6$  min. using hexane: isopropanol = 93:7 as eluent, ee 88%.

***Benzyl 3,4-dihydro-4-(3-methoxyphenyl)-3-phenyl-2H-chromen-2-ylcarbamate (3x/3x')***

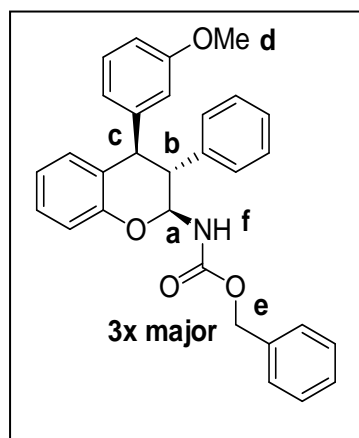

Compound (**3x/3x'**) was prepared according to the general procedure **5**; **Reaction time:** 3 days; purified by column chromatography using 6% (Hexane / EtOAc) solvent system. White solid (26.1 mg, yield: 70%); **mp:** 48-50 °C; **Diastereomeric ratio:** 2.2:1;  **$^1\text{H NMR}$  (600 MHz,  $\text{CDCl}_3$ ):**  $\delta$  7.30 (brs, 4H), 7.23 – 7.14 (m, 8H), 7.06 (t,  $J = 7.9$  Hz, 1H), 7.04 – 7.00 (m, 1H), 6.97 (d,  $J = 9.1$  Hz, 2H), 6.94 (d,  $J = 6.1$  Hz, 2H), 6.88 (t,  $J = 7.4$  Hz, 0.6H), 6.83 (t,  $J = 7.1$  Hz, 1H), 6.76 (d,  $J = 7.7$  Hz, 1H), 6.71 (d,  $J = 7.1$  Hz, 1H), 6.69 (d,  $J = 2.4$  Hz, 1H), 6.67 (d,  $J = 2.6$  Hz, 1H),

6.47 (d,  $J = 7.5$  Hz, 1H), 6.39 (s, 1H), 6.26 (d,  $J = 7.5$  Hz, 0.5H), 6.17 (t,  $J = 10.3$  Hz, 0.4H<sub>a</sub> minor), 6.02 (s, 0.5H), 5.96 (t,  $J = 9.8$  Hz, 1H<sub>a</sub> major), 5.36 (d,  $J = 9.7$  Hz, 1.2H<sub>f</sub>), 5.03 (dd,  $J = 29.0, 10.1$  Hz, 2.7H<sub>e</sub>), 4.34 (d,  $J = 11.0$  Hz, 1H<sub>c</sub> major), 4.27 (d,  $J = 5.5$  Hz, 0.46H<sub>c</sub> minor), 3.63 (s, 3H<sub>d</sub> major), 3.51 (s, 1.5H<sub>d</sub> minor), 3.15 (t,  $J = 10.4$  Hz, 1H<sub>b</sub> major);  **$^{13}\text{C NMR}$  (150MHz,  $\text{CDCl}_3$ ):**  $\delta$  159.6, 159.0, 155.7, 155.5, 154.0, 153.8, 144.2, 142.0, 139.5, 138.7, 137.7, 136.1, 130.1, 129.4, 129.1, 128.9, 128.7, 128.3, 128.3, 128.2, 128.1, 127.4, 127.2, 125.6, 124.0, 122.8, 121.6, 121.4, 121.2, 117.2, 117.1, 115.9, 115.0, 114.3, 112.9, 112.3, 82.0, 78.1, 67.3, 67.2, 55.3, 55.2, 52.8, 51.6, 49.4, 48.6; **HRMS (+ESI):** Calc for  $\text{C}_{30}\text{H}_{28}\text{NO}_4$   $[\text{M}+\text{H}]^+$  466.2013; found: 466.2014.

**HPLC:** Chiralpak IA column. Flow rate 1 mL/min. UV detection at 220 nm for major diastereomer;  $\tau(\text{major}) = 66.0$  min.,  $\tau(\text{minor}) = 45.6$  min. using hexane: isopropanol = 90:10 as eluent, ee 86%.

***Benzyl (3-phenyl-4-(phenylethynyl)chroman-2-yl)carbamate (3y/3y')***

Compound (**3y/3y'**) was prepared according to the general procedure **5**; **Reaction time:** 2 days; purified by column chromatography using 5% (Hexane / EtOAc) solvent system. White solid (22.4 mg, yield: 61%); **mp:** 176-178 °C; **Diastereomeric ratio:** 2.5:1;  **$^1\text{H NMR}$  (600 MHz,  $\text{CDCl}_3$ ):**  $\delta$  7.58 (d,  $J = 7.6$  Hz, 1.1H), 7.36 (d,  $J = 6.5$  Hz, 4.2H), 7.32 (brs, 6.3H), 7.28 (d,  $J = 7.6$  Hz, 5.2H), 7.23 (dd,  $J = 14.7, 8.1$  Hz, 7H), 7.02 (t,  $J = 7.3$  Hz, 1H), 6.98 – 6.92 (m, 2H), 6.42 (t,

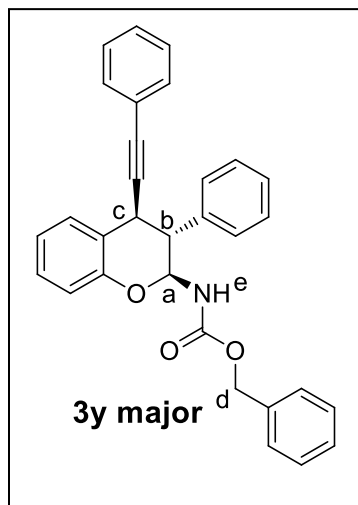

$J = 9.8$  Hz,  $0.3H_a$  minor), 5.97 (t,  $J = 9.4$  Hz,  $1H_a$  major), 5.69 (d,  $J = 9.8$  Hz,  $1H_c$  major), 5.42 (d,  $J = 9.7$  Hz,  $0.4H_c$  minor), 5.09 (d,  $J = 28.8$  Hz,  $2.8H_d$ ), 4.38 (d,  $J = 9.9$  Hz,  $1H_c$  major), 4.21 (d,  $J = 4.5$  Hz,  $0.4H_c$  minor), 3.39 (dd,  $J = 8.9, 4.3$  Hz,  $0.4H_b$  minor), 3.24 (t,  $J = 9.3$  Hz,  $1H_b$  major);  $^{13}C$  NMR (100 MHz,  $CDCl_3$ ):  $\delta$  155.5, 152.7, 152.6, 138.7, 136.1, 131.8, 131.7, 129.3, 129.3, 129.2, 129.1, 129.0, 128.7, 128.6, 128.4, 128.3, 128.2, 127.9, 127.9, 123.2, 123.1, 122.0, 121.7, 121.4, 121.4, 117.5, 117.4, 84.0, 81.5, 67.4, 49.6, 47.0, 37.3, 36.9; **HRMS (+ESI)**: Calc for  $C_{31}H_{26}NO_3$   $[M+H]^+$  460.1907; found: 460.1912.

**HPLC**: Chiralpak ID column. Flow rate 1 mL/min. UV detection at 254 nm for major diastereomer;  $\tau$ (major) = 89.4 min.,  $\tau$ (minor) = 70.7 min. using hexane: isopropanol = 95:5 up to  $\tau = 50.1$  min. thereafter, hexane: isopropanol = 90:10 as eluent, ee 52%.

## 9. NMR Spectra of enecarbamates (2) & trisubstituted chromans (3):

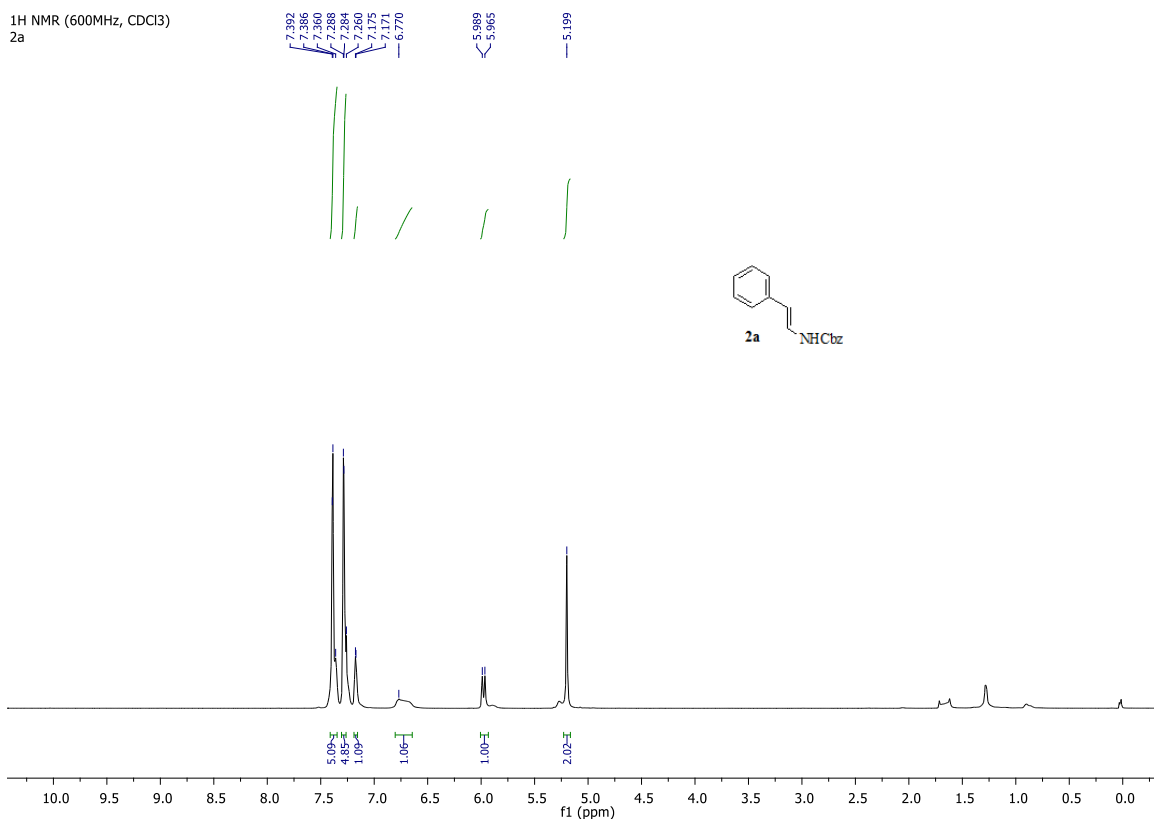

<sup>13</sup>C NMR (100 MHz, CDCl<sub>3</sub>)  
2a

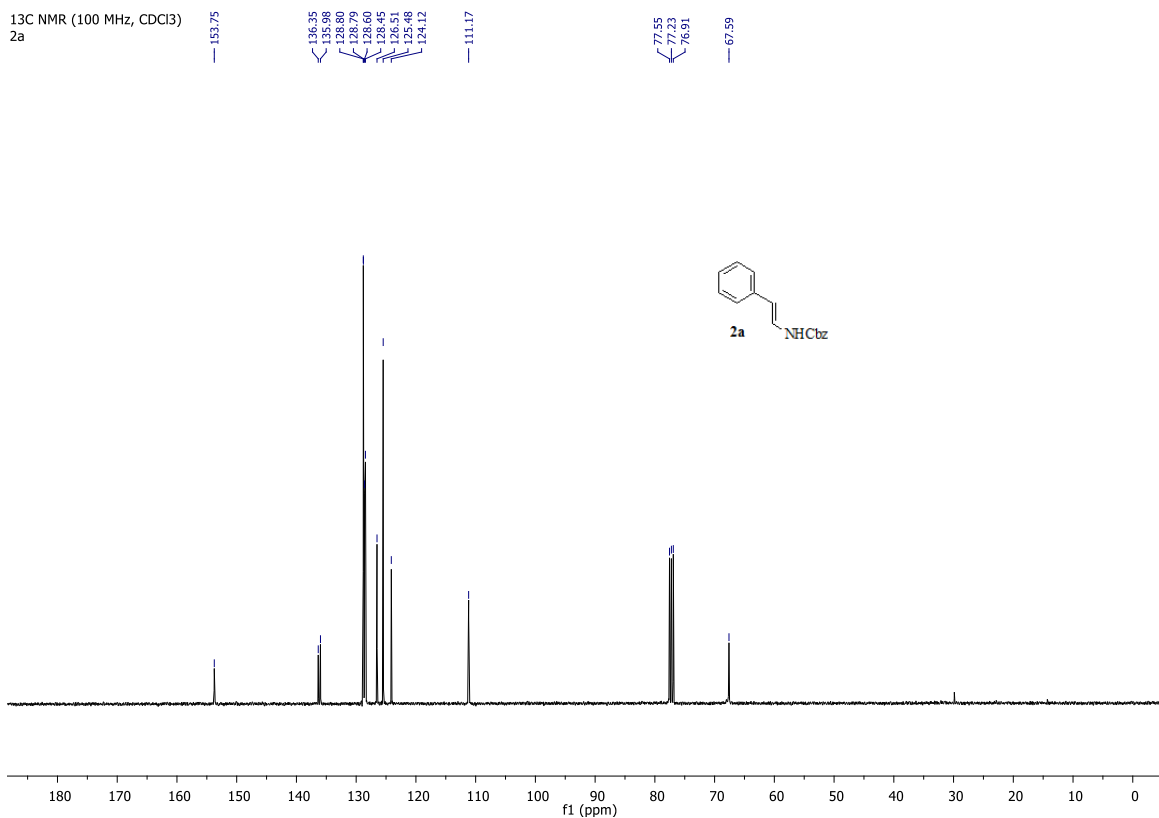

<sup>1</sup>H NMR (600MHz, CDCl<sub>3</sub>)  
2b

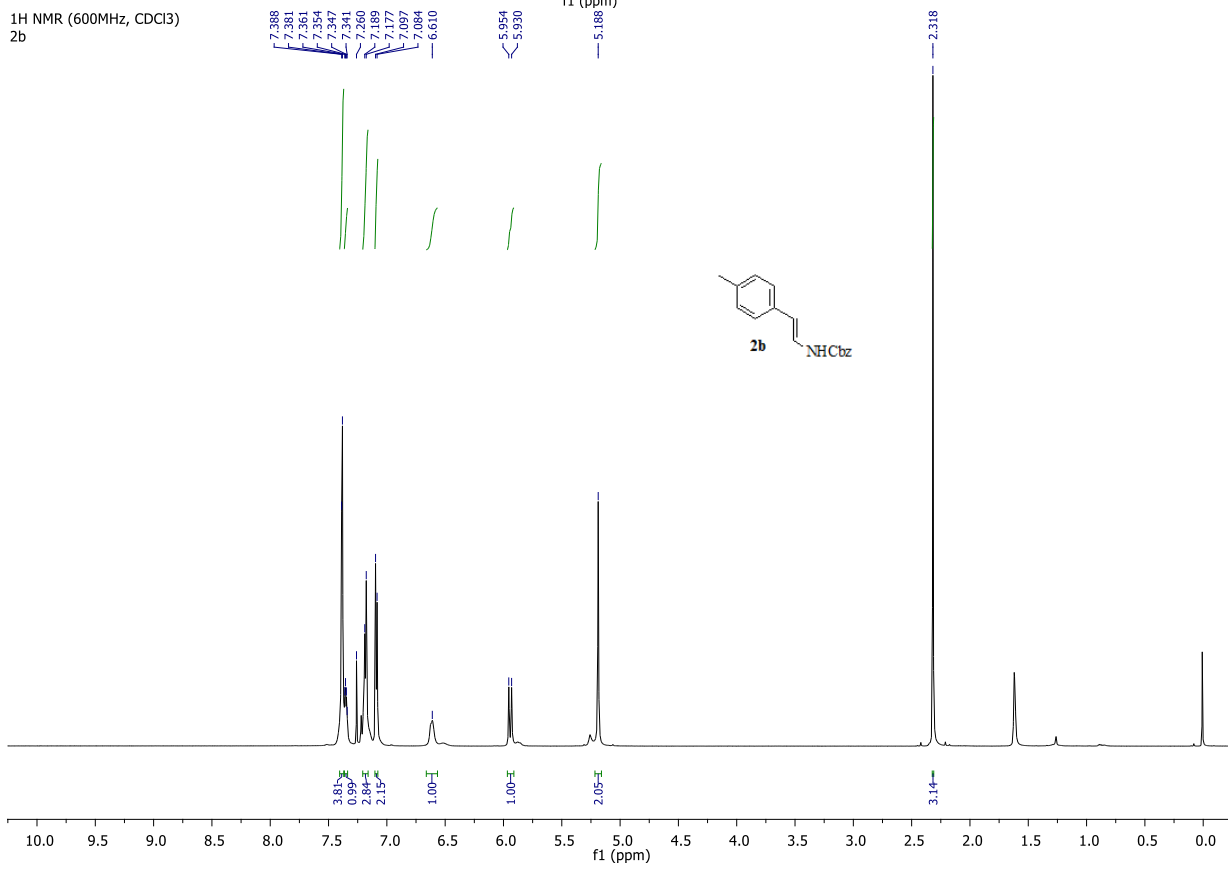

<sup>13</sup>C NMR (100 MHz, CDCl<sub>3</sub>)  
2b

153.81  
136.15  
135.62  
133.46  
129.47  
128.73  
128.51  
128.38  
125.36  
123.32  
111.19  
77.55  
77.23  
76.91  
67.46  
21.22

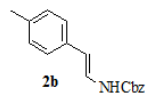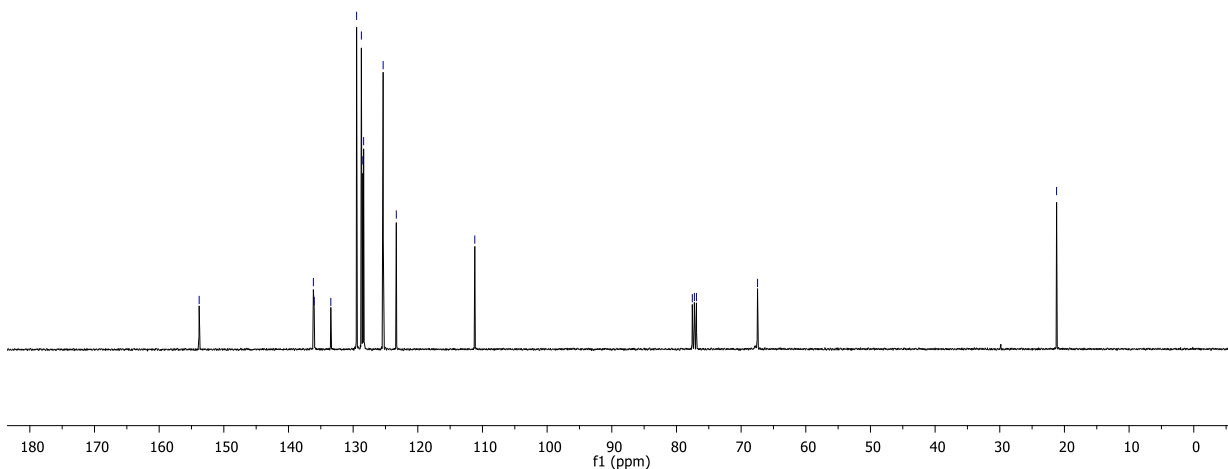

<sup>1</sup>H NMR (600MHz, CDCl<sub>3</sub>)  
2c

7.394  
7.387  
7.353  
7.345  
7.260  
7.237  
7.225  
7.165  
6.777  
5.982  
5.958  
5.197  
2.912  
2.901  
2.889  
2.878  
2.867  
1.262  
1.251

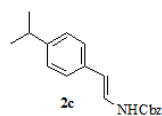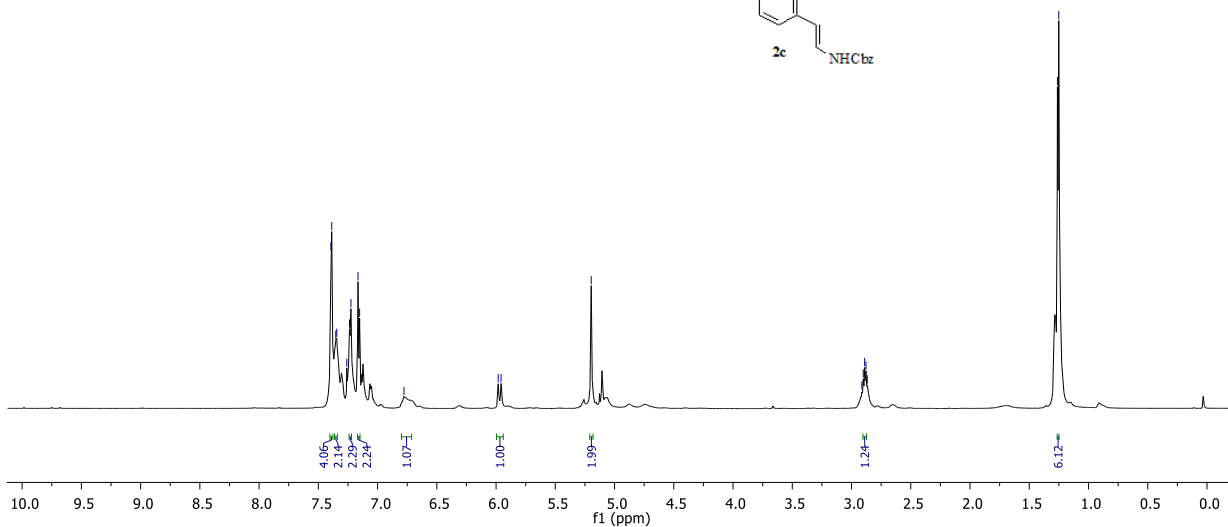

<sup>13</sup>C NMR (100 MHz, CDCl<sub>3</sub>)  
2c

153.88  
147.15  
136.00  
133.67  
128.85  
128.33  
126.78  
125.43  
123.41  
111.20  
77.55  
77.23  
76.91  
67.41  
33.84  
24.05

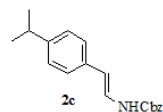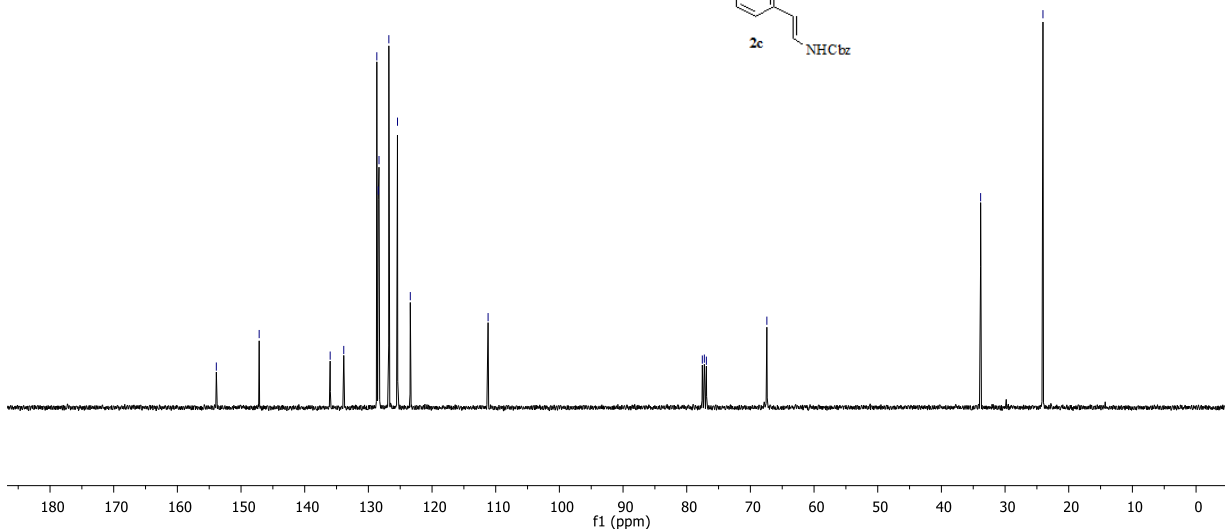

<sup>1</sup>H NMR (600MHz, CDCl<sub>3</sub>)  
2d

7.390  
7.383  
7.369  
7.363  
7.356  
7.349  
7.342  
7.317  
7.310  
7.280  
7.237  
7.222  
6.629  
5.060  
5.945  
5.190  
1.310

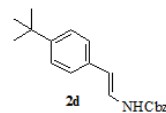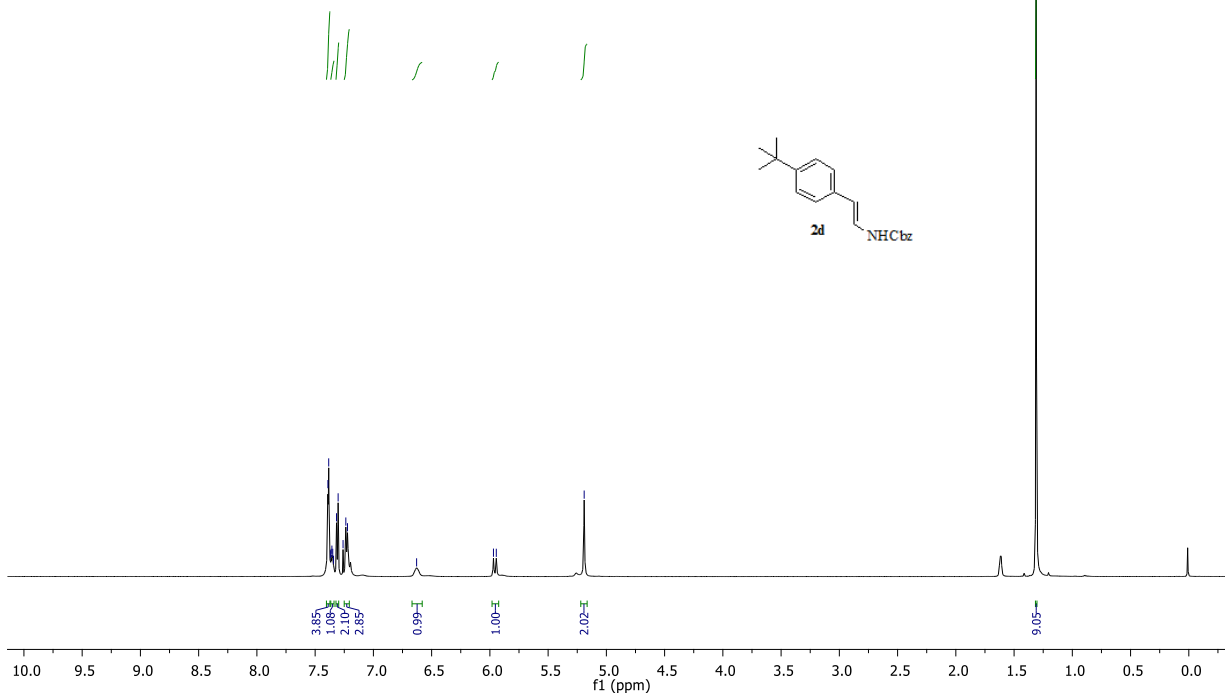

<sup>13</sup>C NMR (100 MHz, CDCl<sub>3</sub>)  
2d

153.88  
149.43

136.00  
133.48  
130.47  
128.36  
125.65  
123.51

111.06

77.55  
77.23  
76.91

67.44

34.55  
31.41

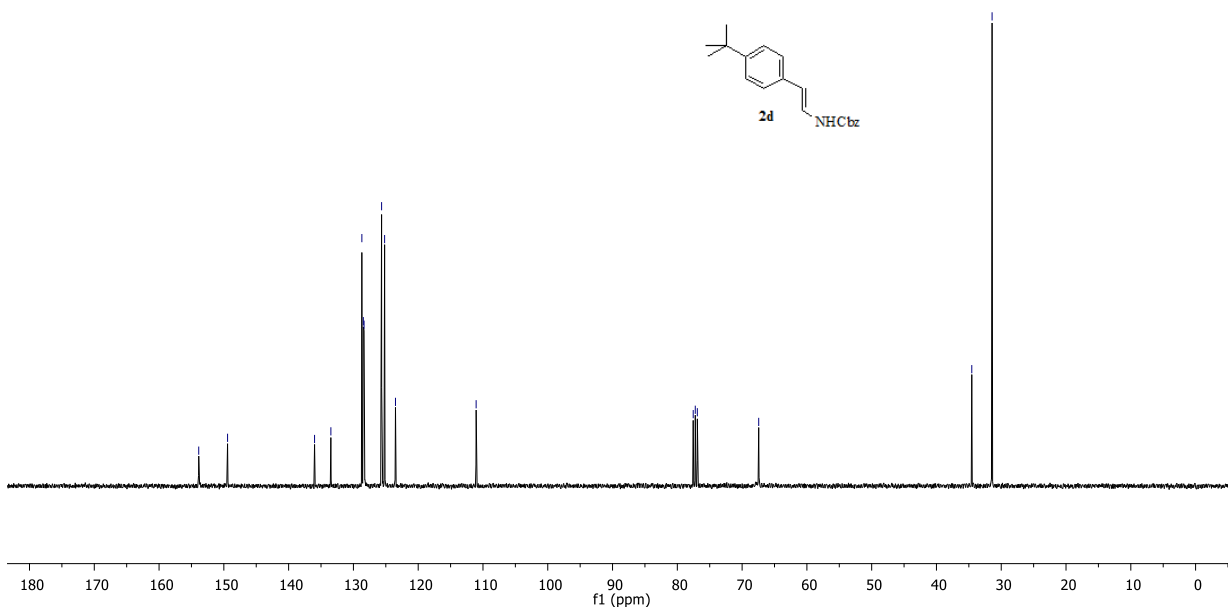

<sup>1</sup>H NMR (600MHz, CDCl<sub>3</sub>)  
2e

7.385  
7.378  
7.260  
7.256  
7.234  
7.215  
7.182  
7.158  
7.139  
6.982  
6.953  
6.743  
5.956  
5.932

f1 (ppm)

5.191

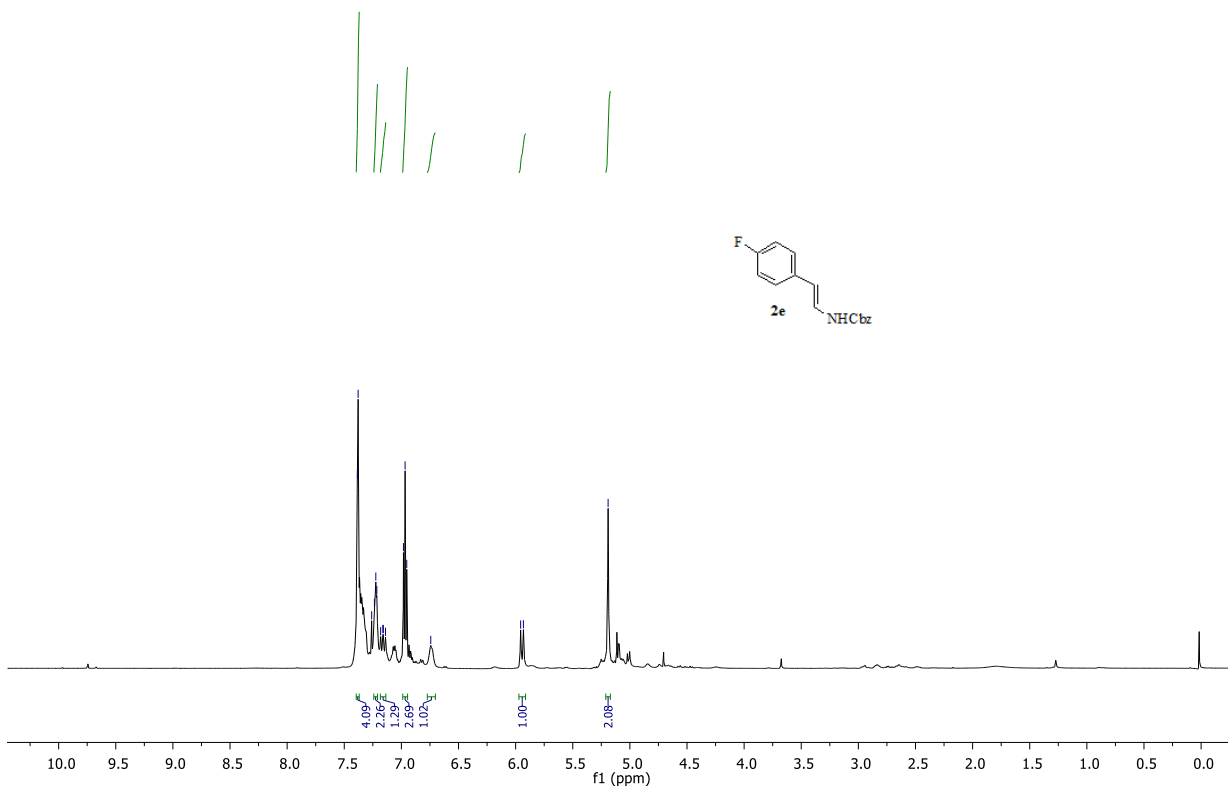

<sup>13</sup>C NMR (100 MHz, CDCl<sub>3</sub>)  
2e

162.86  
160.86  
153.86

135.91  
132.43  
128.73  
128.54  
128.35  
126.81  
123.93  
115.72  
115.50  
110.10

77.55  
77.23  
76.91  
67.53

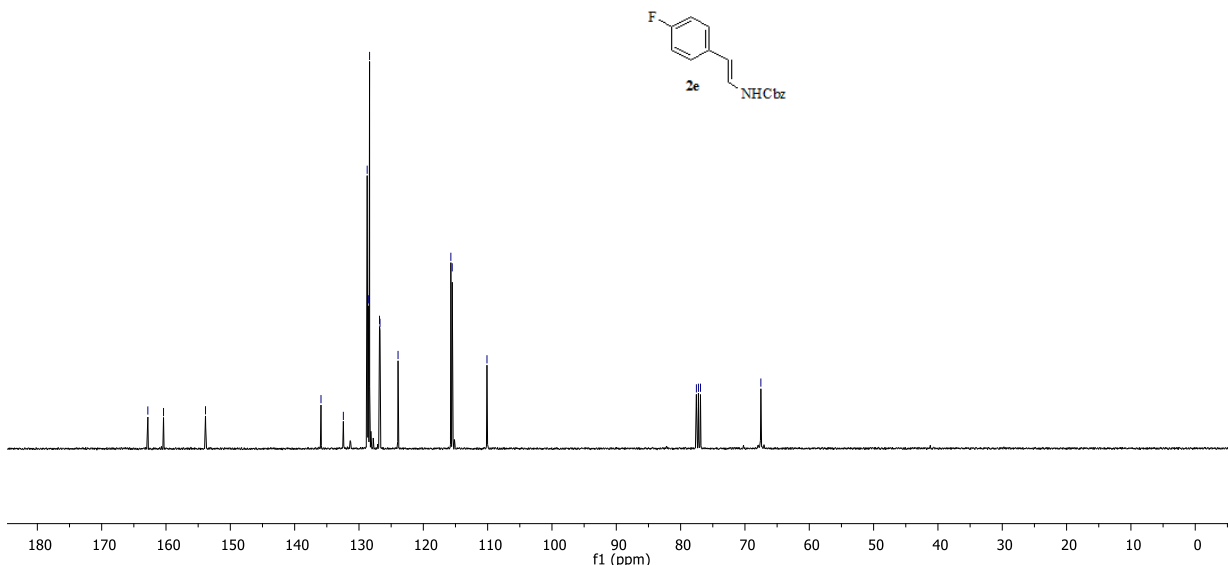

<sup>1</sup>H NMR (600MHz, CDCl<sub>3</sub>)  
2f

7.377  
7.363  
7.357  
7.349  
7.260  
7.240  
7.226  
7.194  
7.181  
6.726  
5.929  
5.905  
5.191

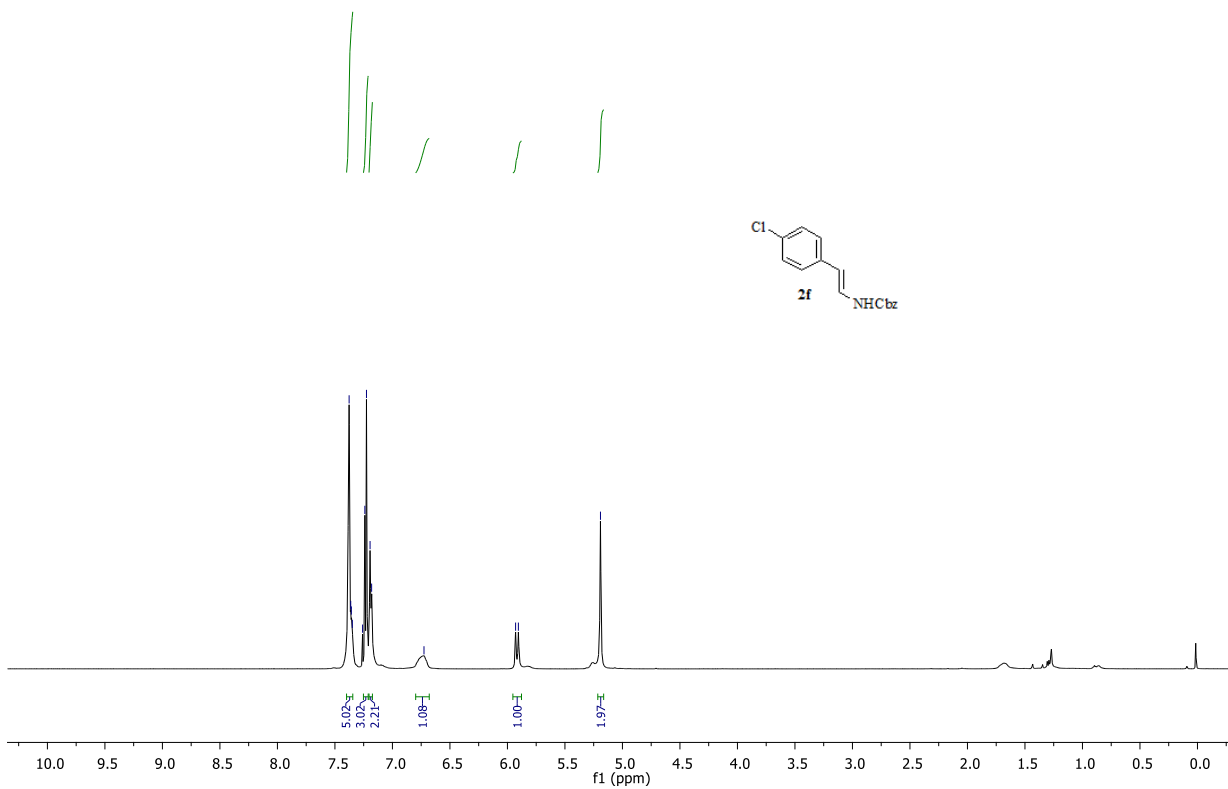



<sup>13</sup>C NMR (100 MHz, CDCl<sub>3</sub>)  
2f

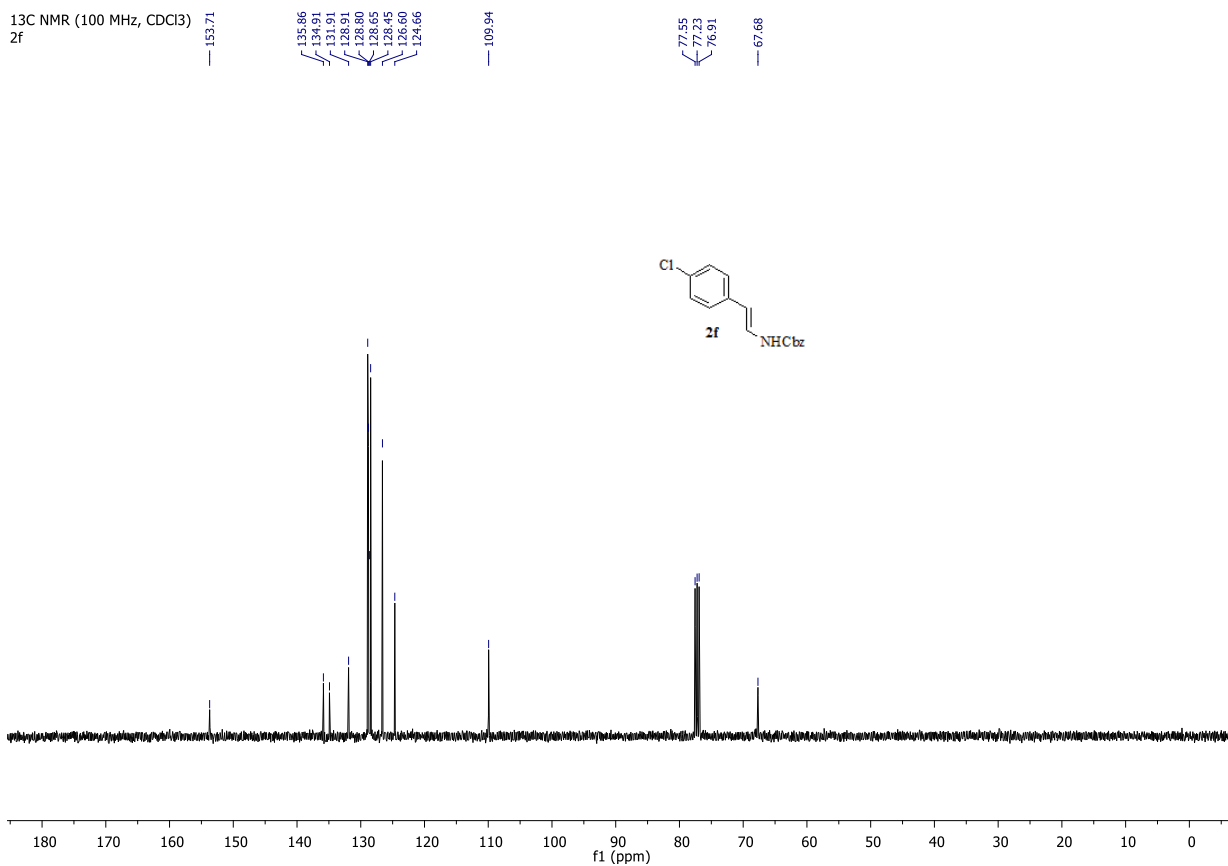

<sup>1</sup>H NMR (600MHz, CDCl<sub>3</sub>)  
2g

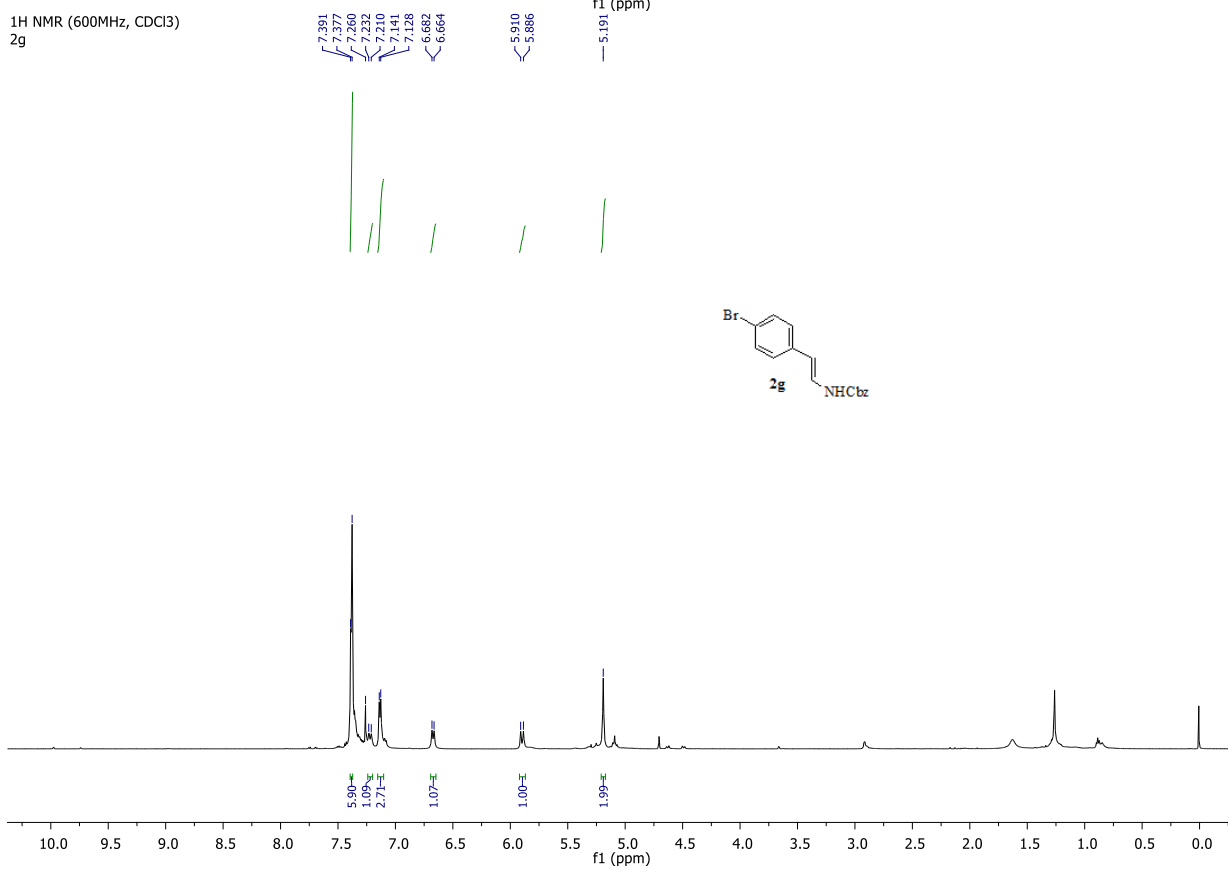

<sup>13</sup>C NMR (75 MHz, CDCl<sub>3</sub>)  
2g

153.72  
135.82  
135.36  
135.16  
134.79  
128.64  
128.45  
126.92  
124.74  
119.88  
109.94  
77.65  
77.23  
76.81  
67.68

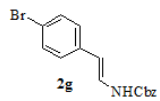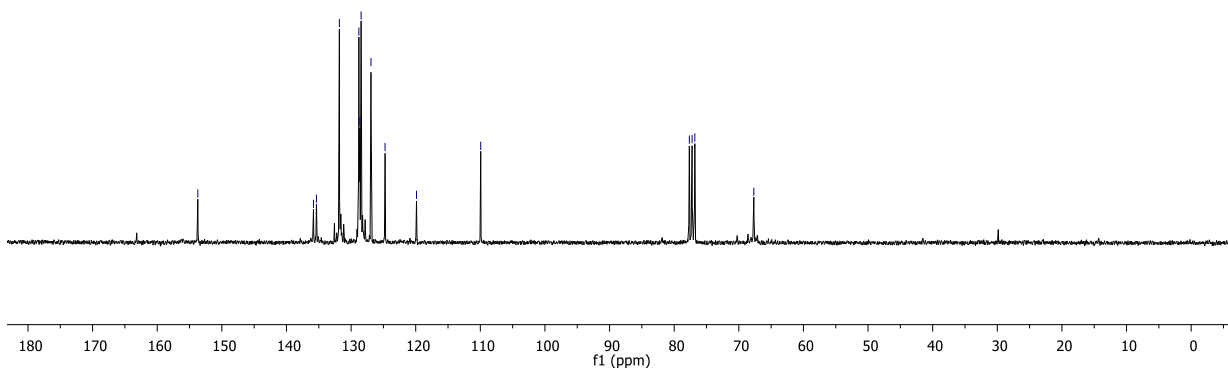

<sup>1</sup>H NMR (600MHz, CDCl<sub>3</sub>)  
2h

7.346  
7.340  
7.322  
7.315  
7.308  
7.301  
7.293  
7.210  
7.189  
7.144  
7.131  
7.118  
7.075  
7.052  
6.940  
6.932  
6.942  
6.716  
6.698  
5.911  
5.887  
5.152  
2.283

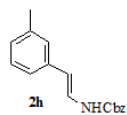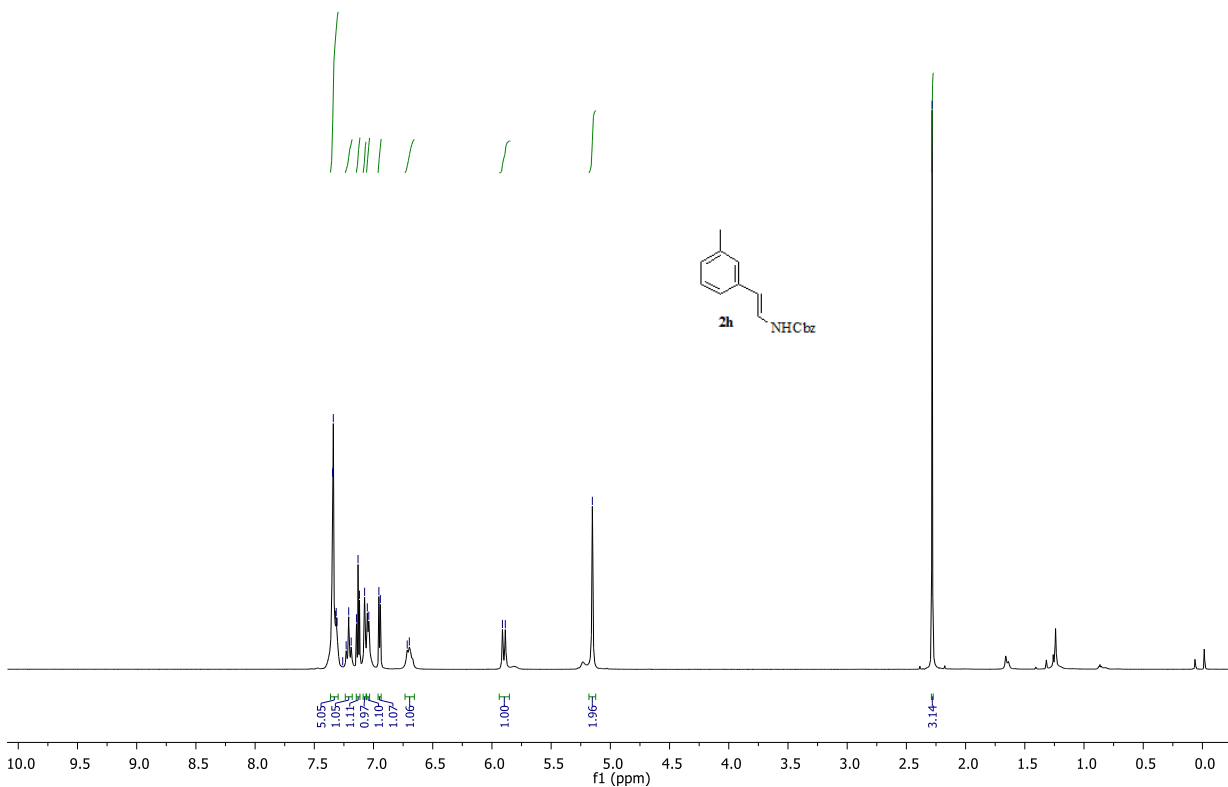

<sup>13</sup>C NMR (100 MHz, CDCl<sub>3</sub>)  
2h

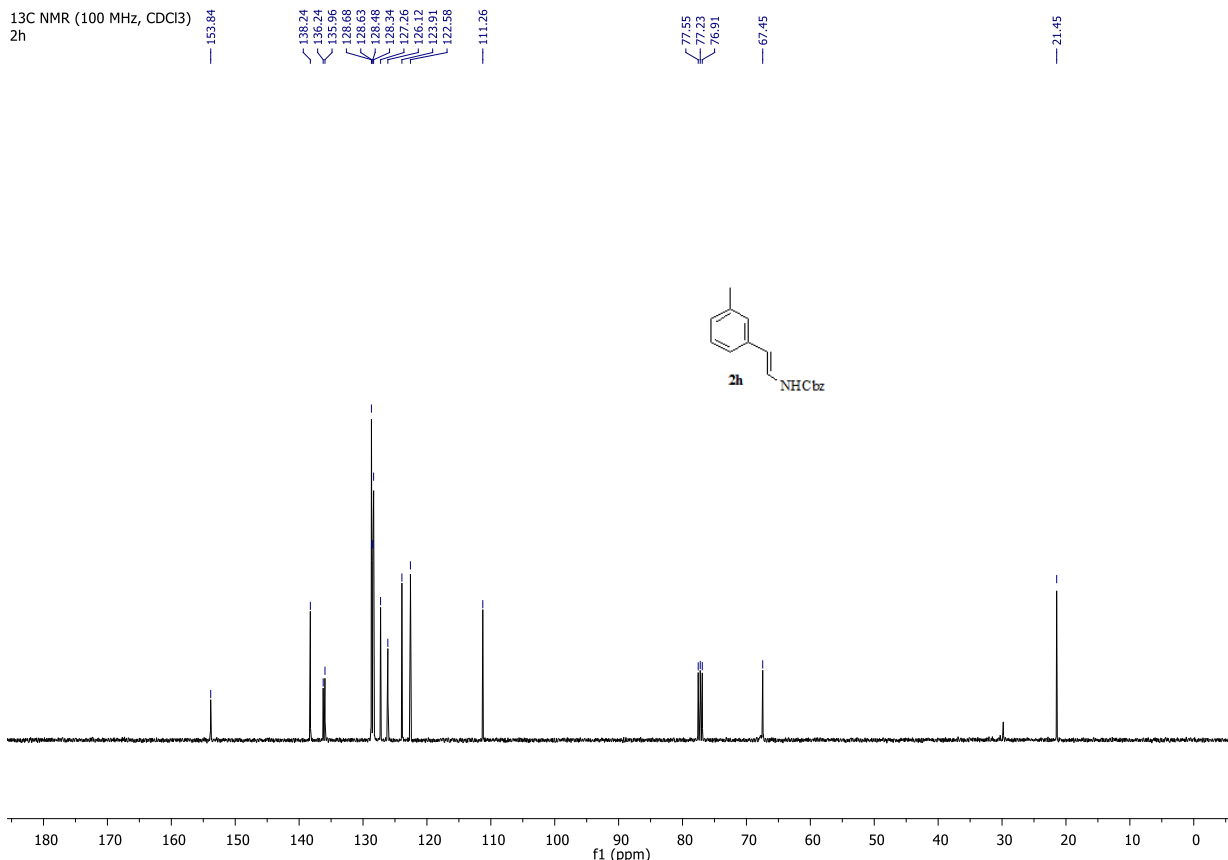

<sup>1</sup>H NMR (600MHz, CDCl<sub>3</sub>)  
2i

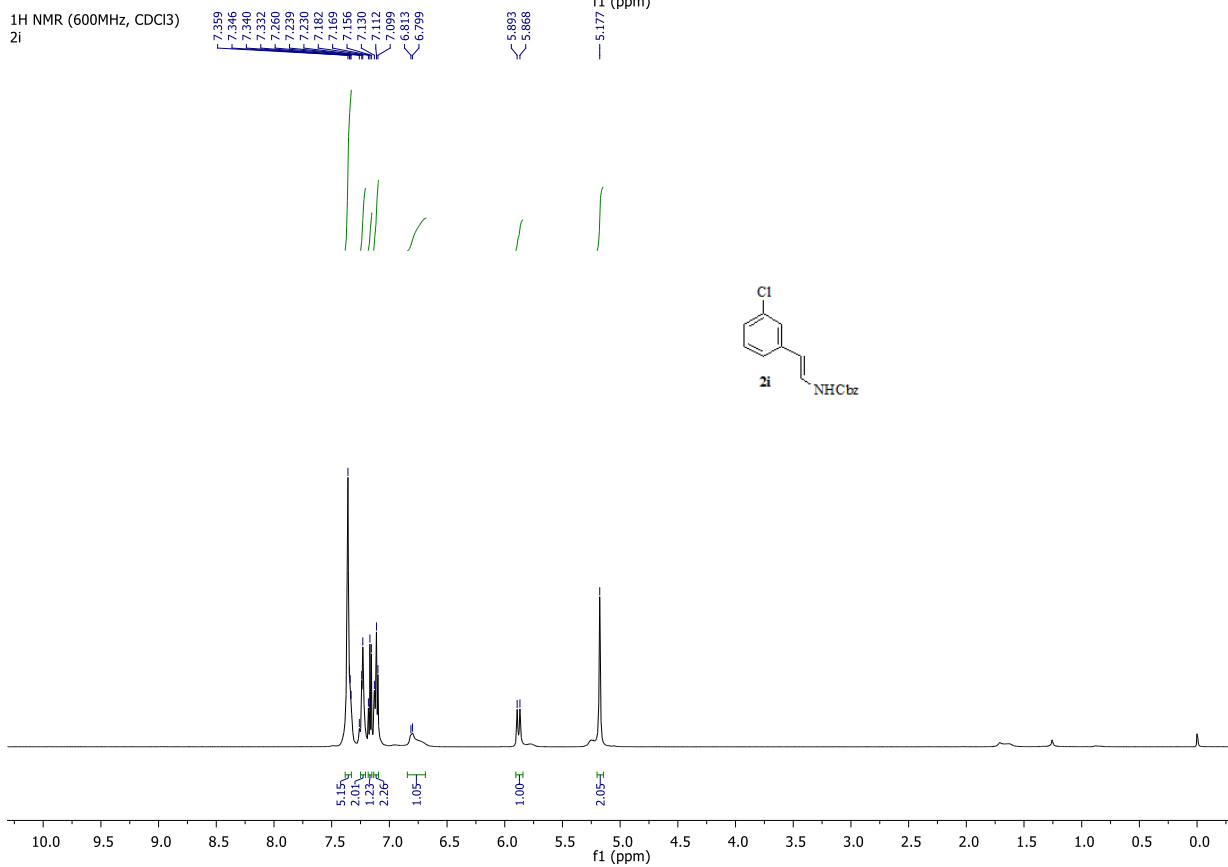

<sup>13</sup>C NMR (100 MHz, CDCl<sub>3</sub>)  
2i

153.72  
138.33  
135.80  
134.64  
129.95  
128.77  
128.63  
128.42  
128.33  
125.33  
123.40  
109.75  
77.54  
77.23  
76.91  
67.69

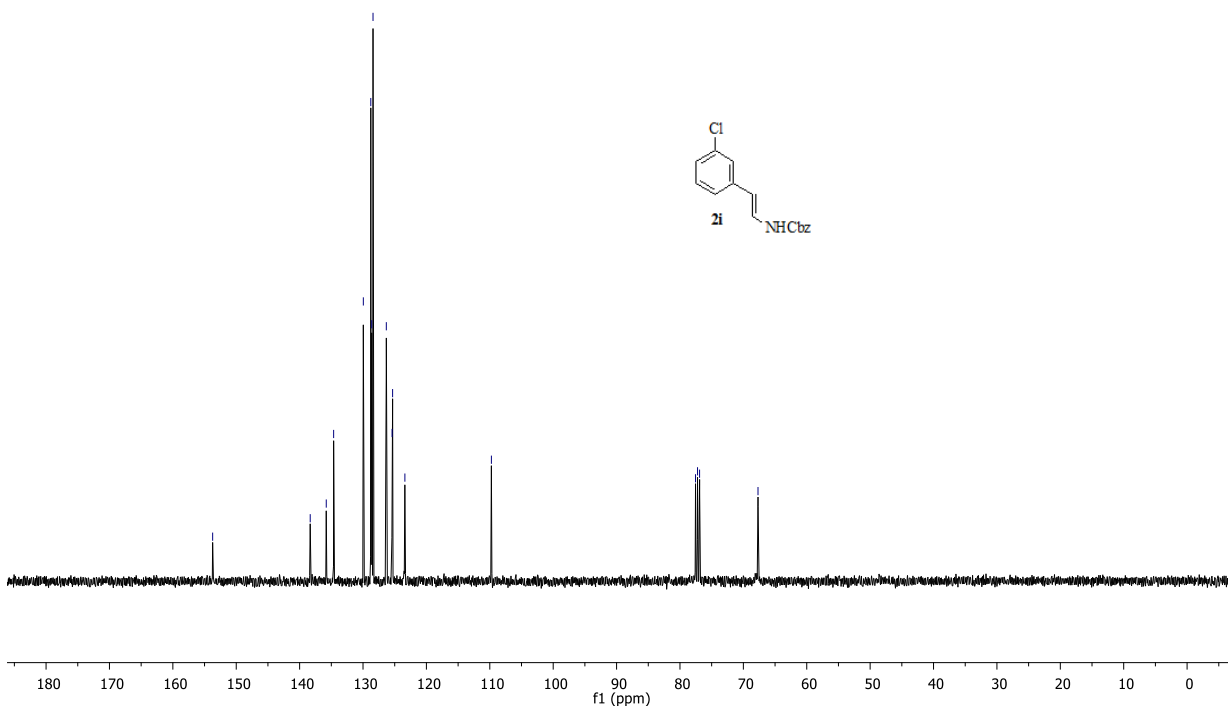

<sup>1</sup>H NMR (600MHz, CDCl<sub>3</sub>)  
2j

7.410  
7.377  
7.283  
7.270  
7.260  
7.193  
7.181  
7.130  
7.120  
7.107  
6.875  
5.898  
5.874  
5.197

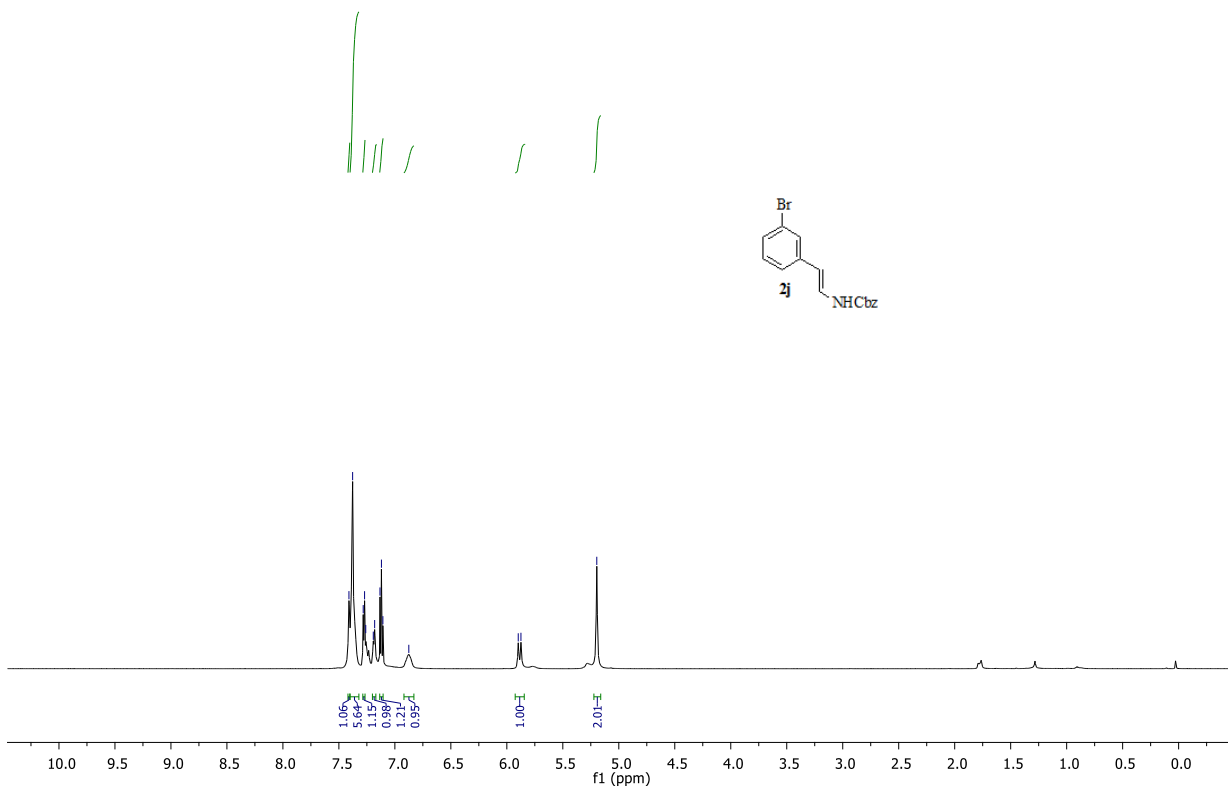

<sup>13</sup>C NMR (100 MHz, CDCl<sub>3</sub>)  
2j

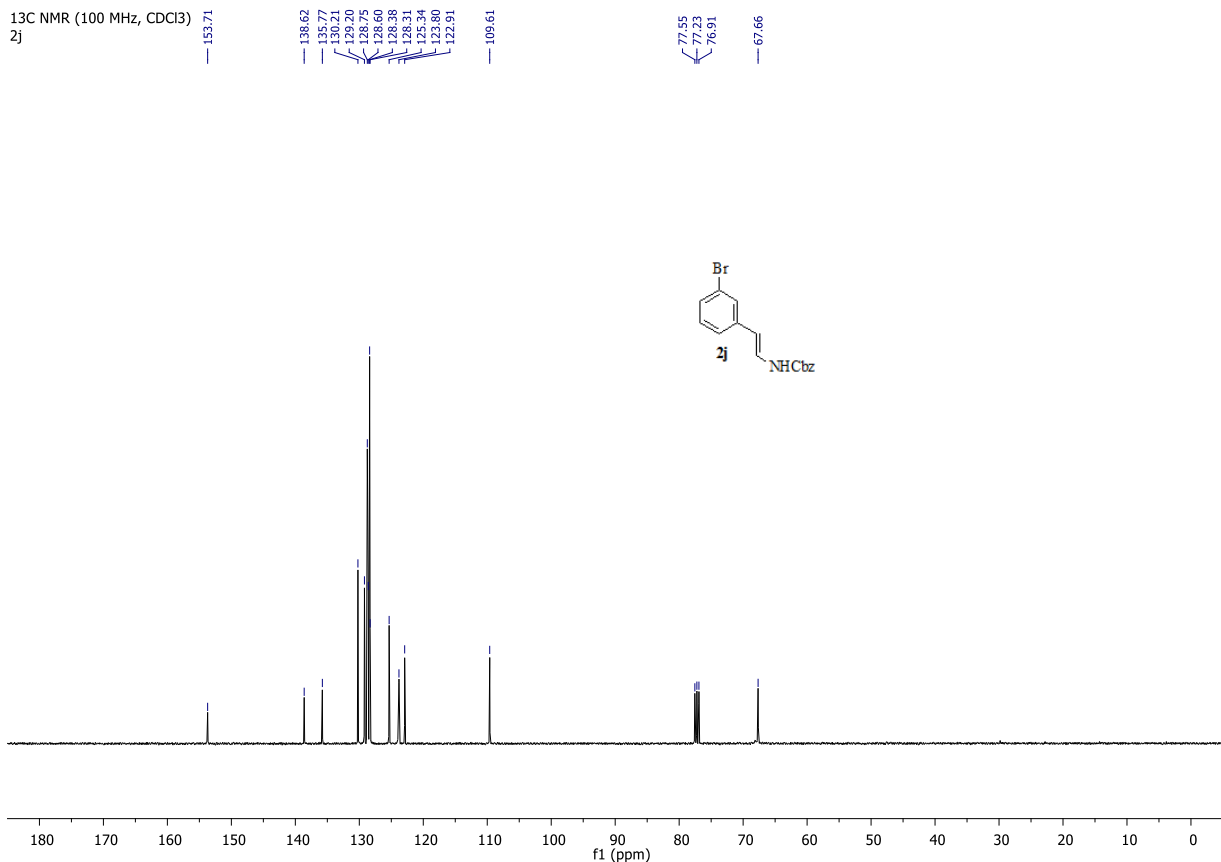

<sup>1</sup>H NMR (400MHz, CDCl<sub>3</sub>)  
2k

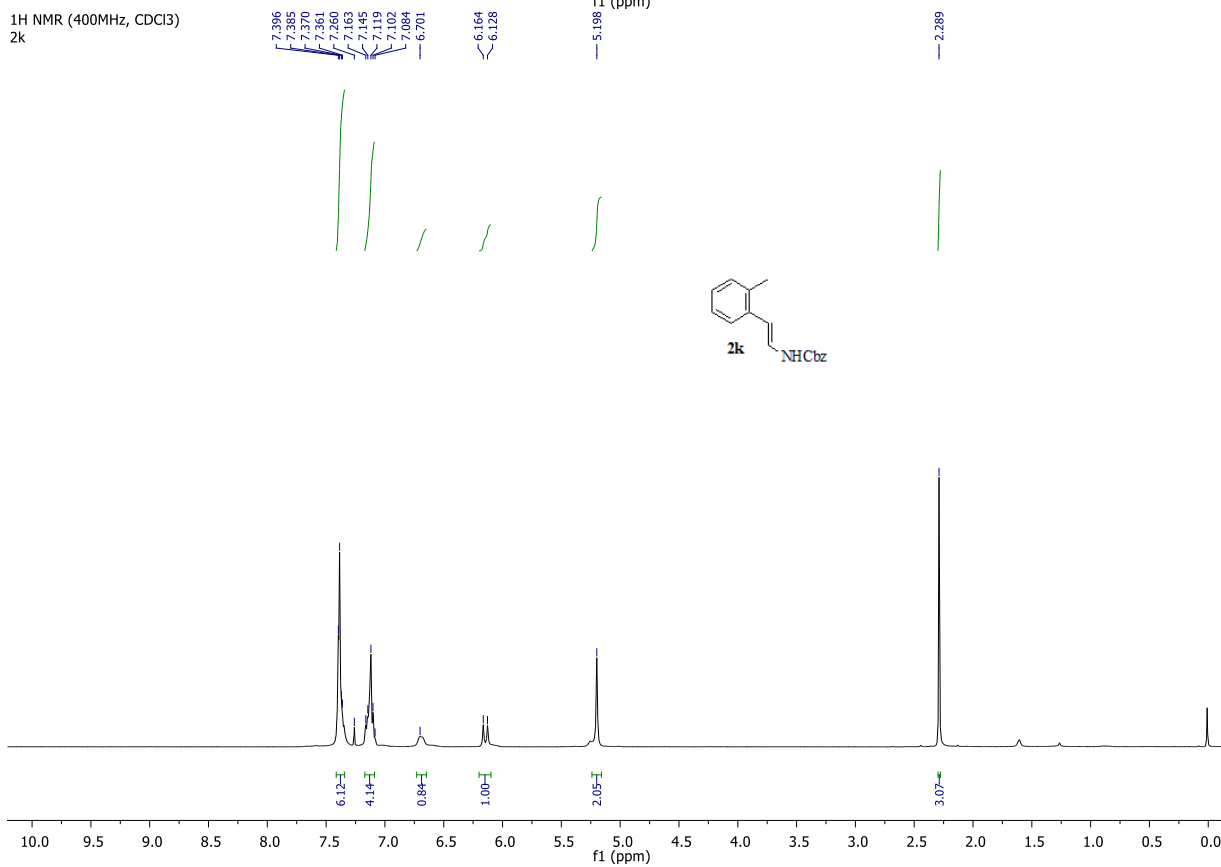

<sup>13</sup>C NMR (100 MHz, CDCl<sub>3</sub>)  
2k

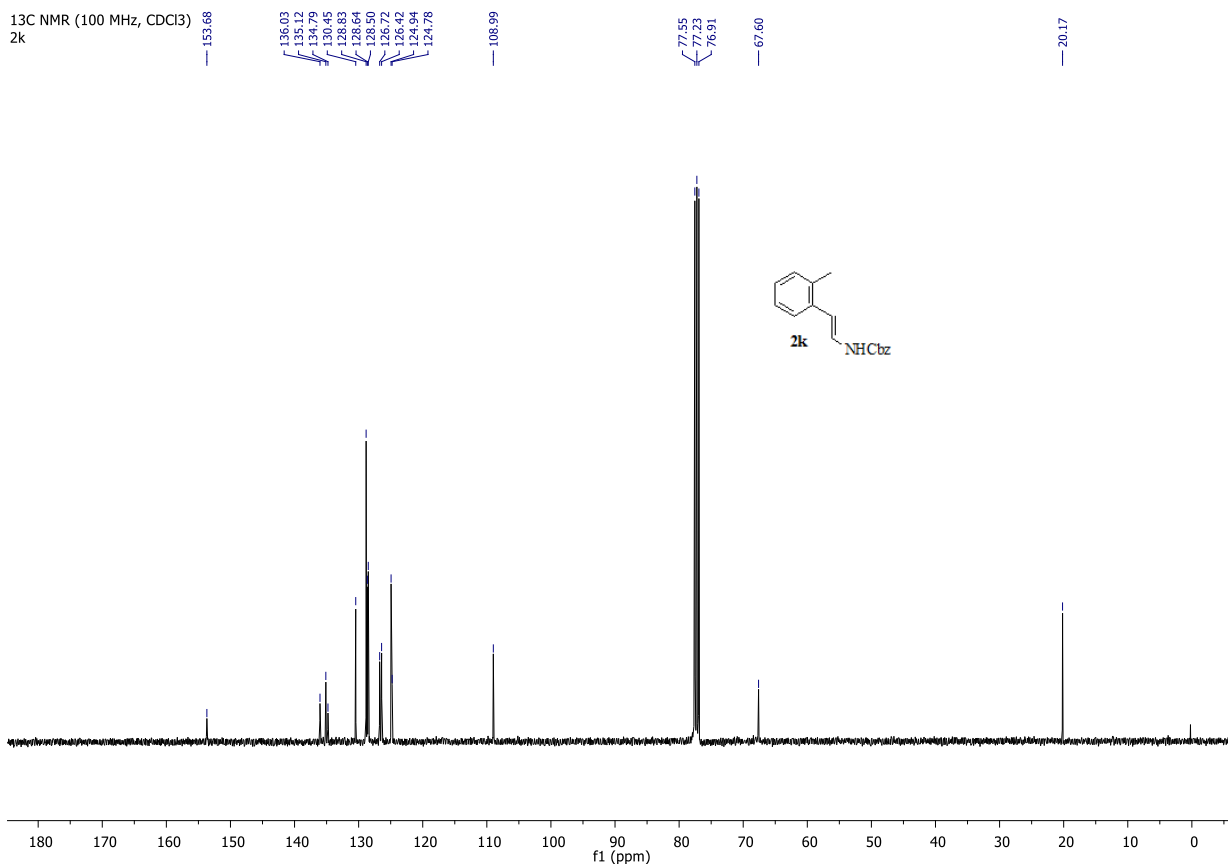

<sup>1</sup>H NMR (600MHz, CDCl<sub>3</sub>)  
2l

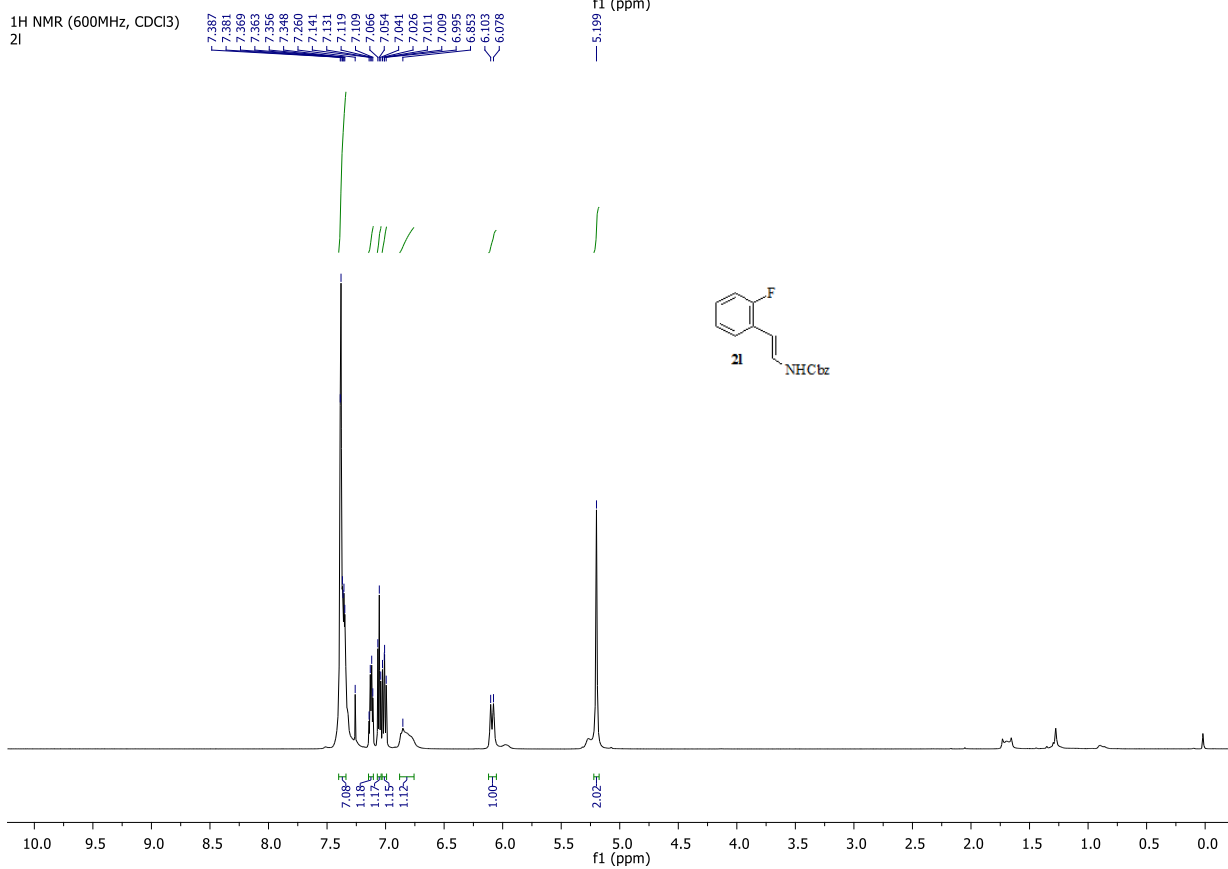

<sup>13</sup>C NMR (100 MHz, CDCl<sub>3</sub>)  
2l

160.63  
159.83  
153.71  
135.88  
128.77  
128.60  
128.54  
127.55  
127.47  
124.33  
124.29  
118.63  
115.63  
103.71  
103.68  
77.55  
77.53  
76.91  
67.65

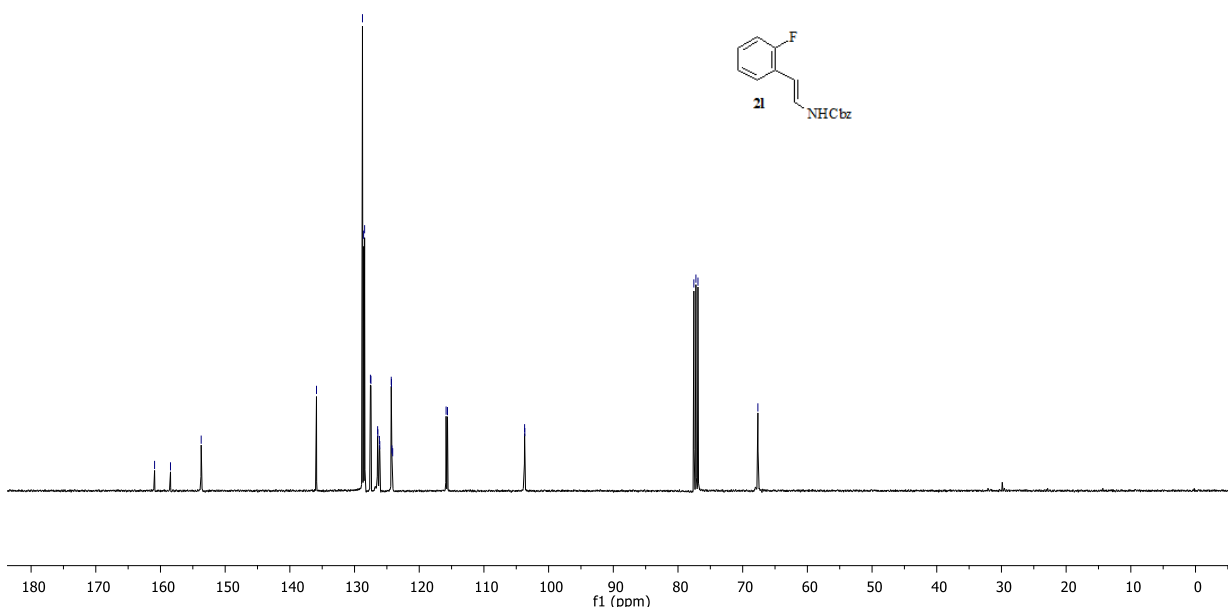

<sup>1</sup>H NMR (400MHz, CDCl<sub>3</sub>)  
2m

7.488  
7.469  
7.381  
7.333  
7.313  
7.280  
7.219  
7.187  
7.168  
7.123  
7.104  
7.085  
6.803  
6.781  
6.361  
6.325  
5.202

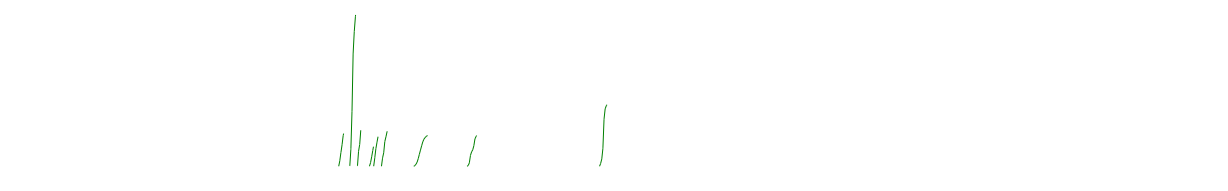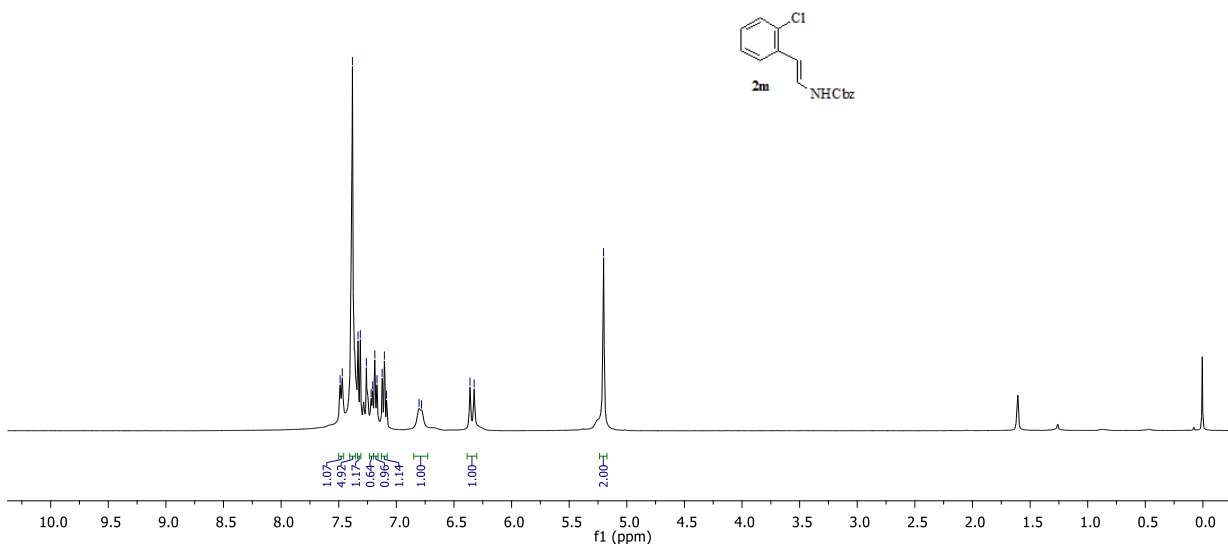

<sup>13</sup>C NMR (100 MHz, CDCl<sub>3</sub>)  
2m

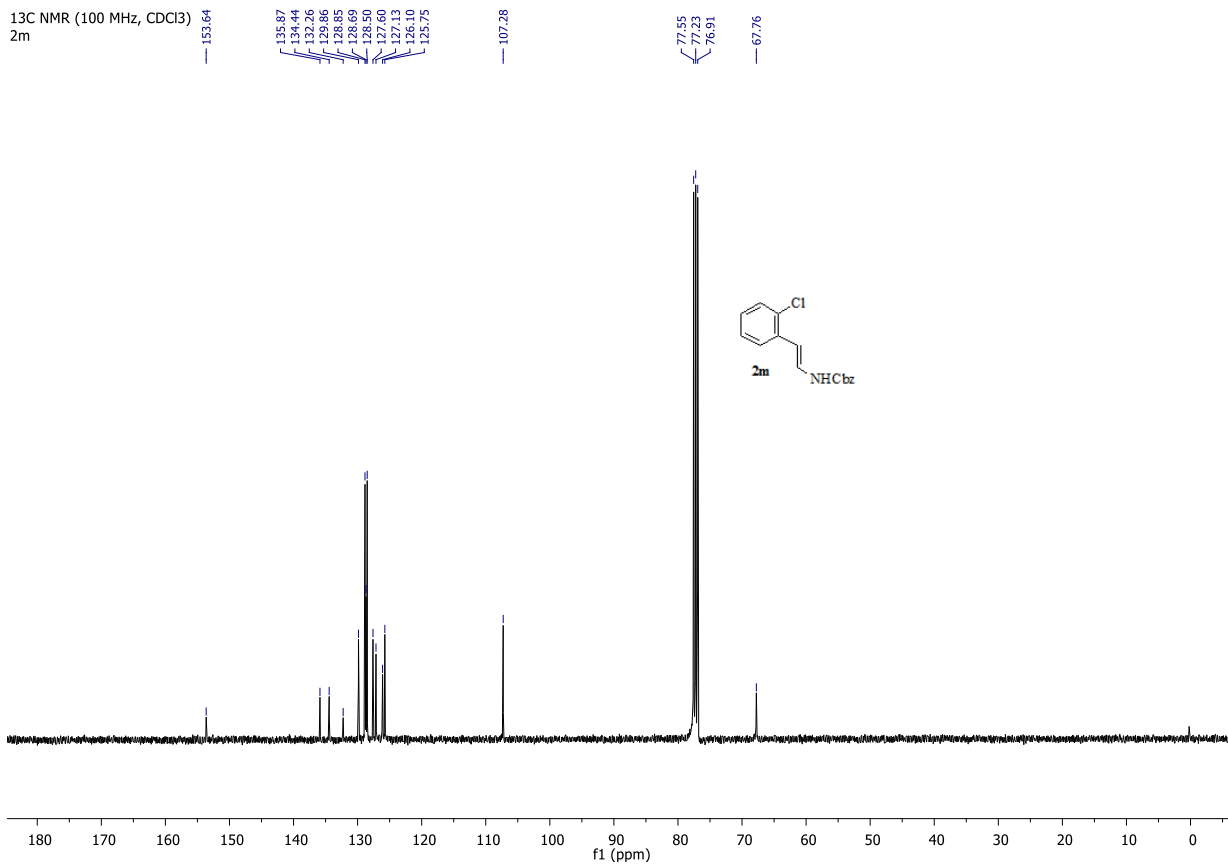



<sup>1</sup>H NMR (400MHz, CDCl<sub>3</sub>)  
2n

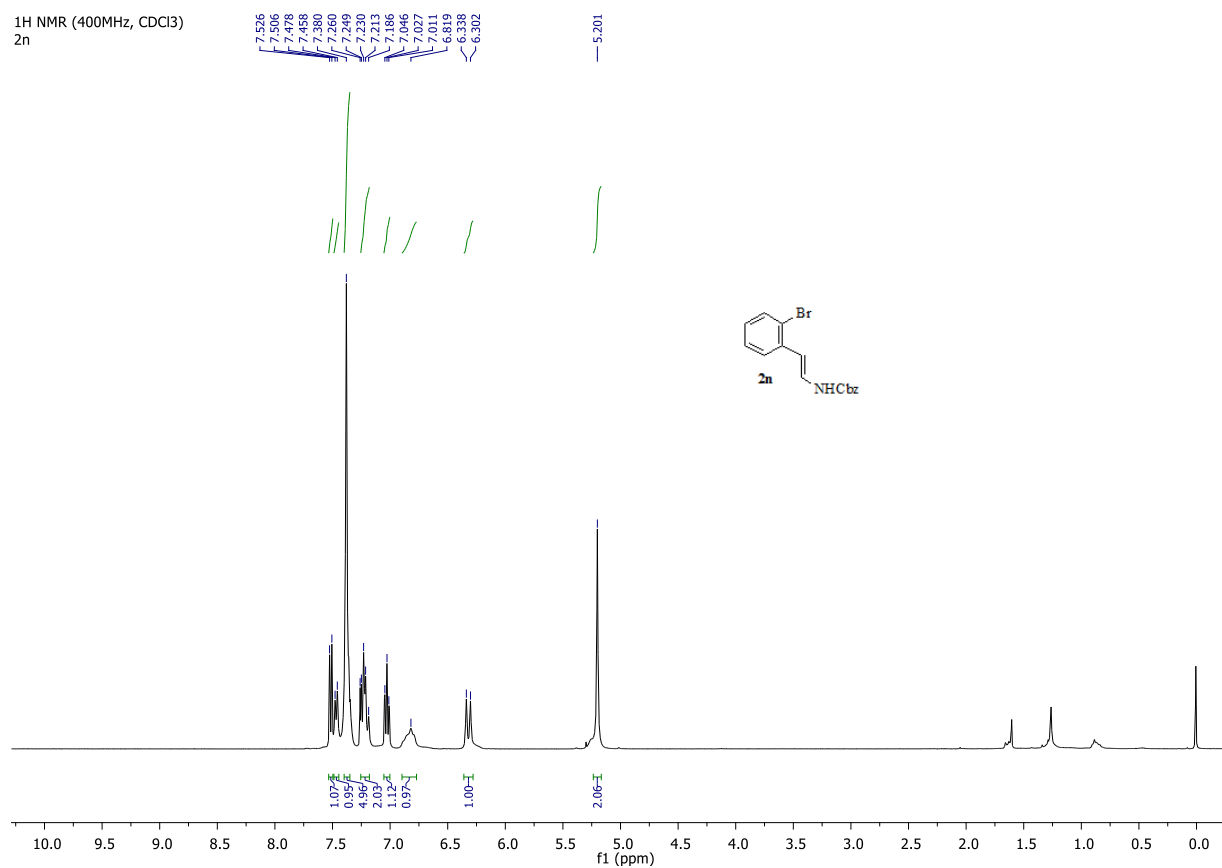

<sup>13</sup>C NMR (100 MHz, CDCl<sub>3</sub>)  
2n

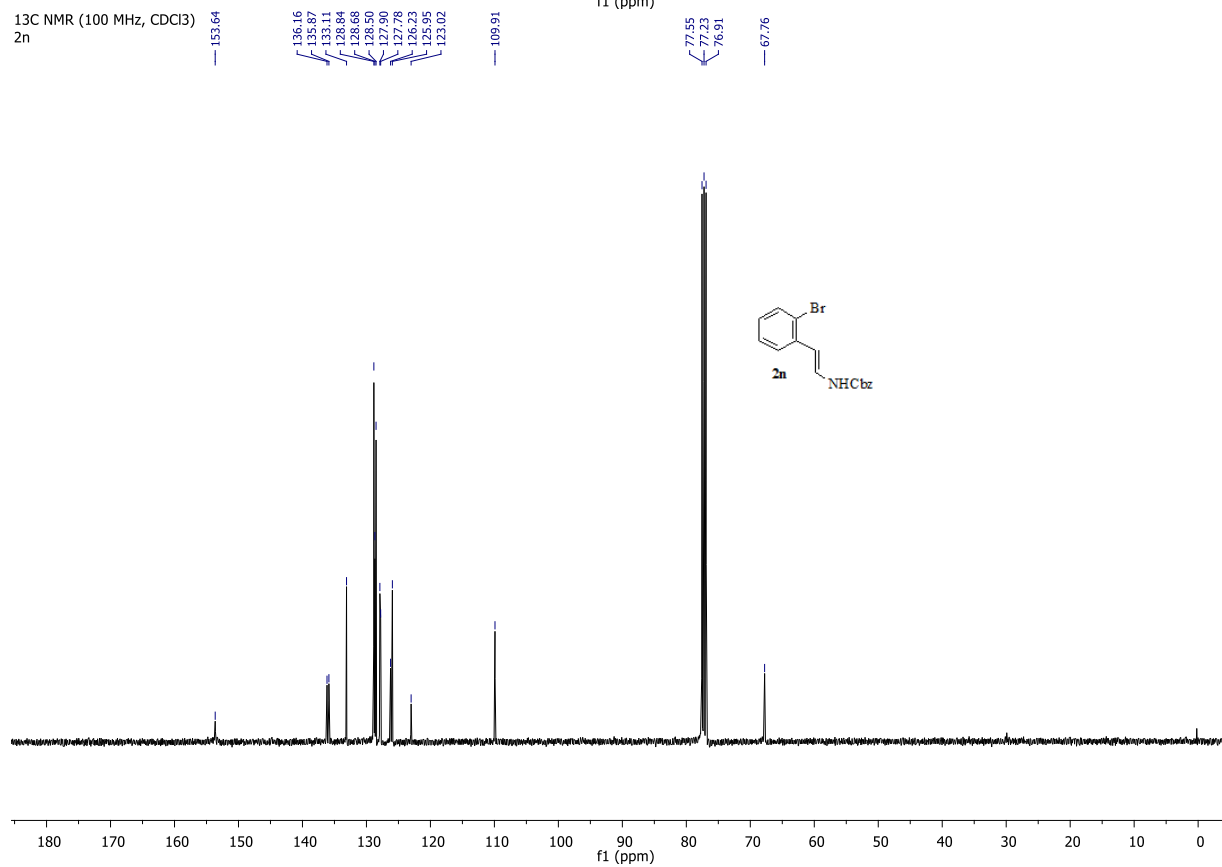

<sup>1</sup>H NMR (400MHz, CDCl<sub>3</sub>)  
2o

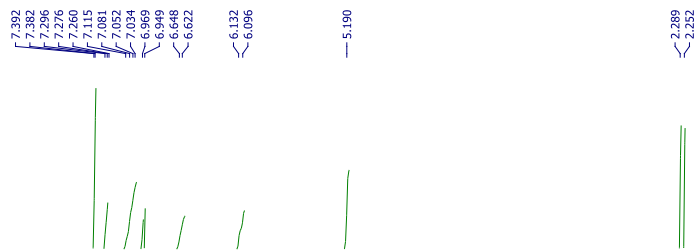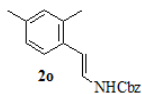

<sup>13</sup>C NMR (100 MHz, CDCl<sub>3</sub>)  
2o

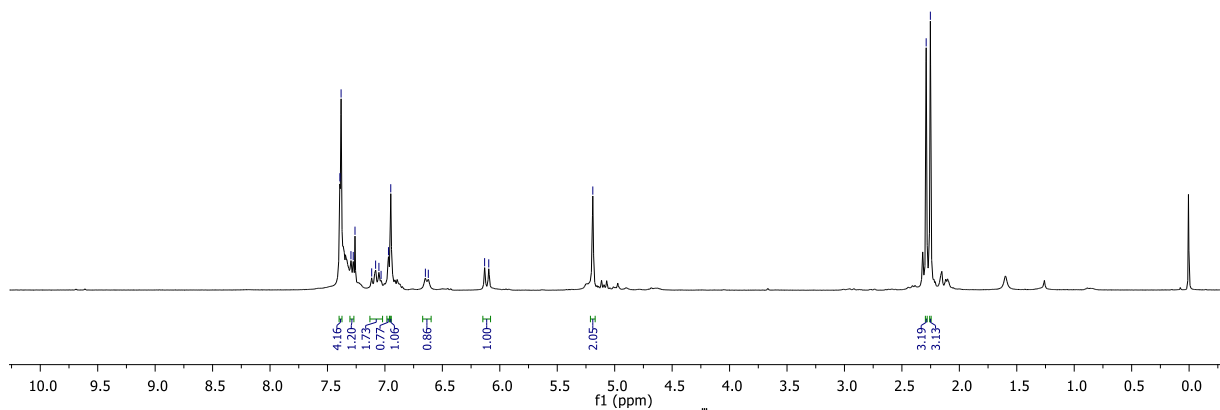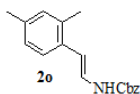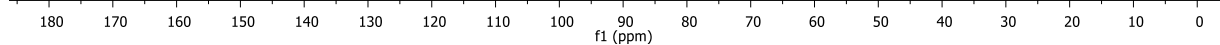

<sup>1</sup>H NMR (600MHz, CDCl<sub>3</sub>)  
2p

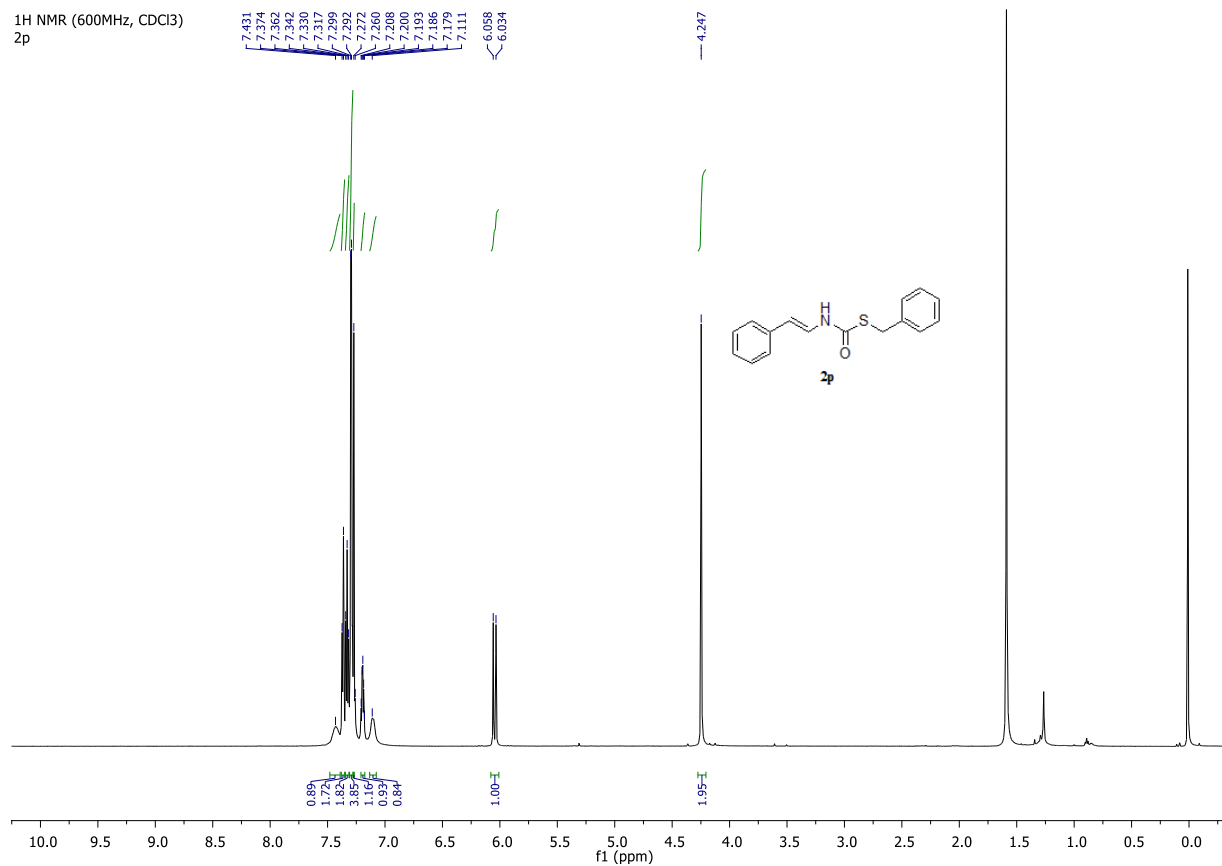

<sup>13</sup>C NMR (100 MHz, CDCl<sub>3</sub>)  
2p

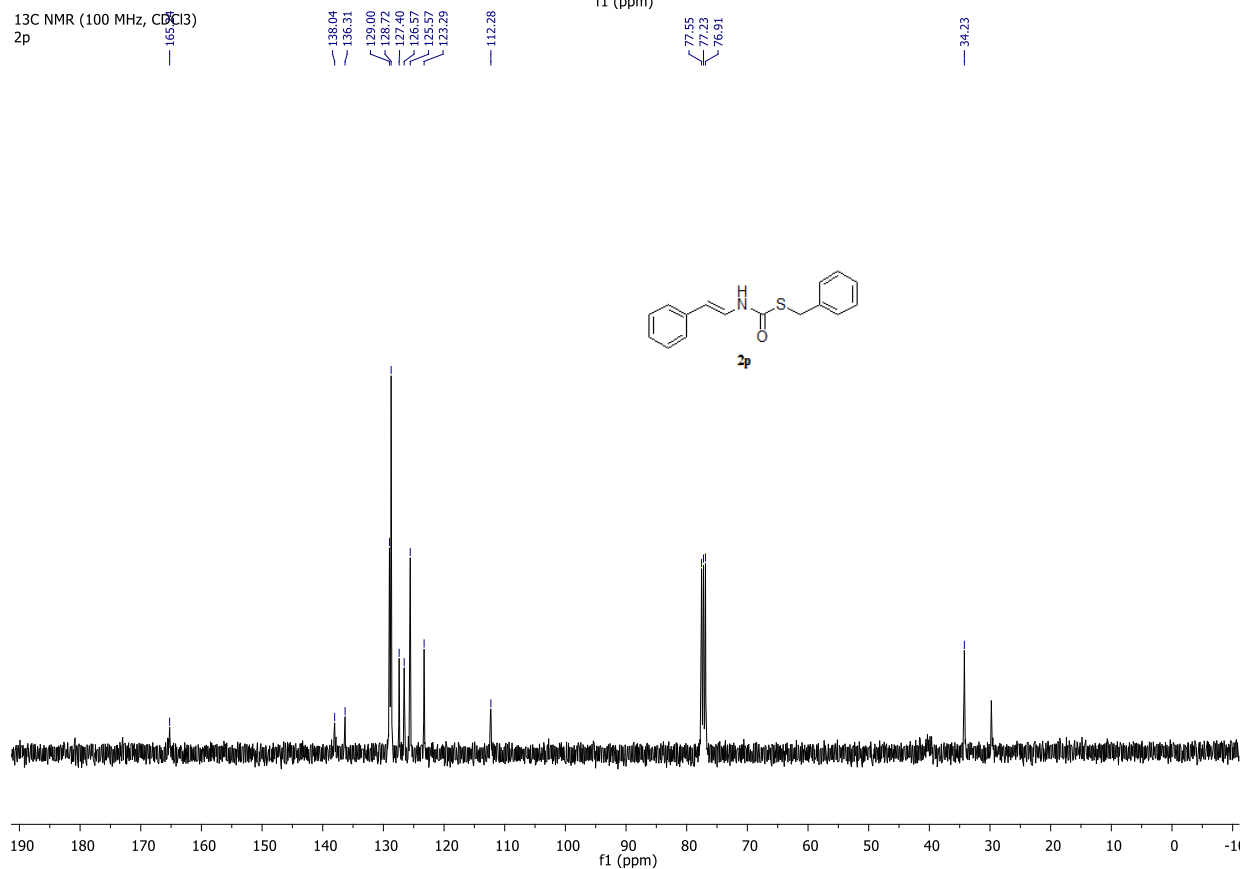

1H NMR (600MHz, CDCl3)  
2q

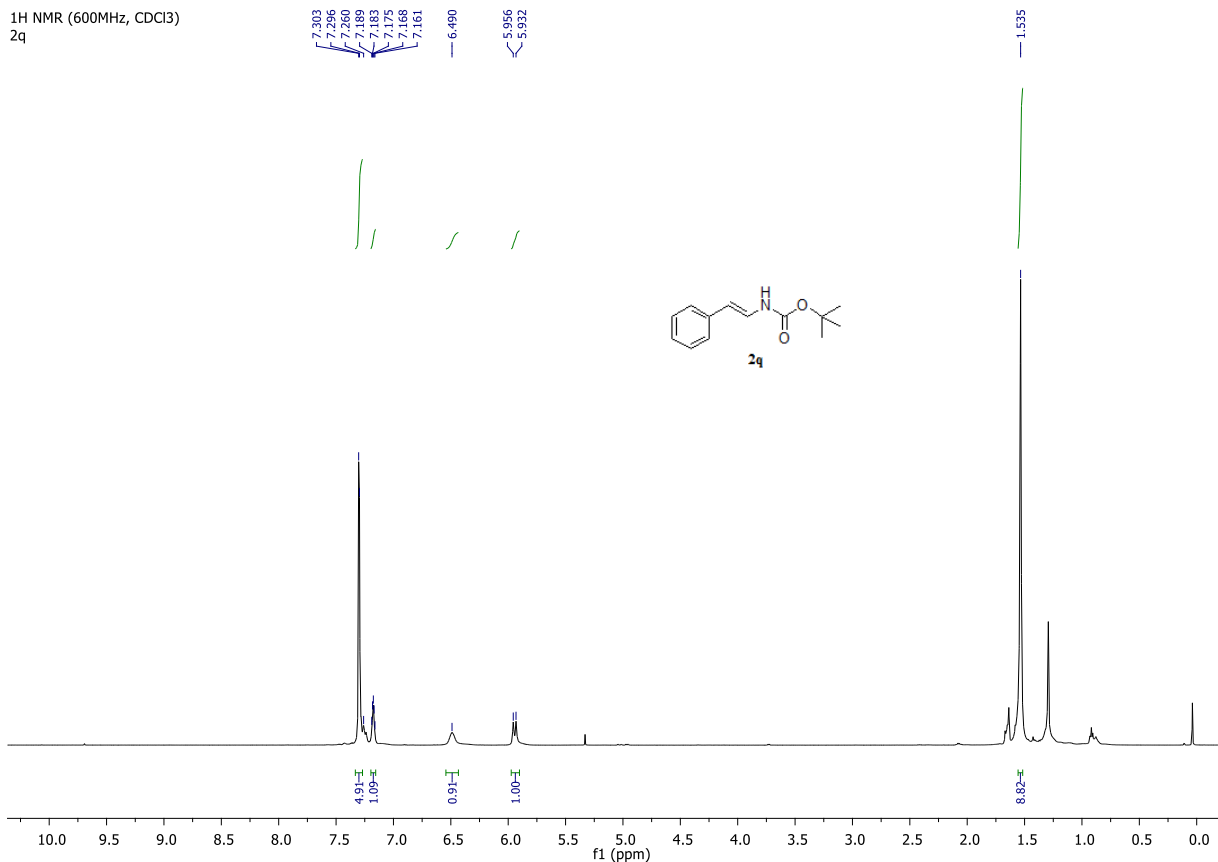

SN-CGBOCEN-13C (SR) 500

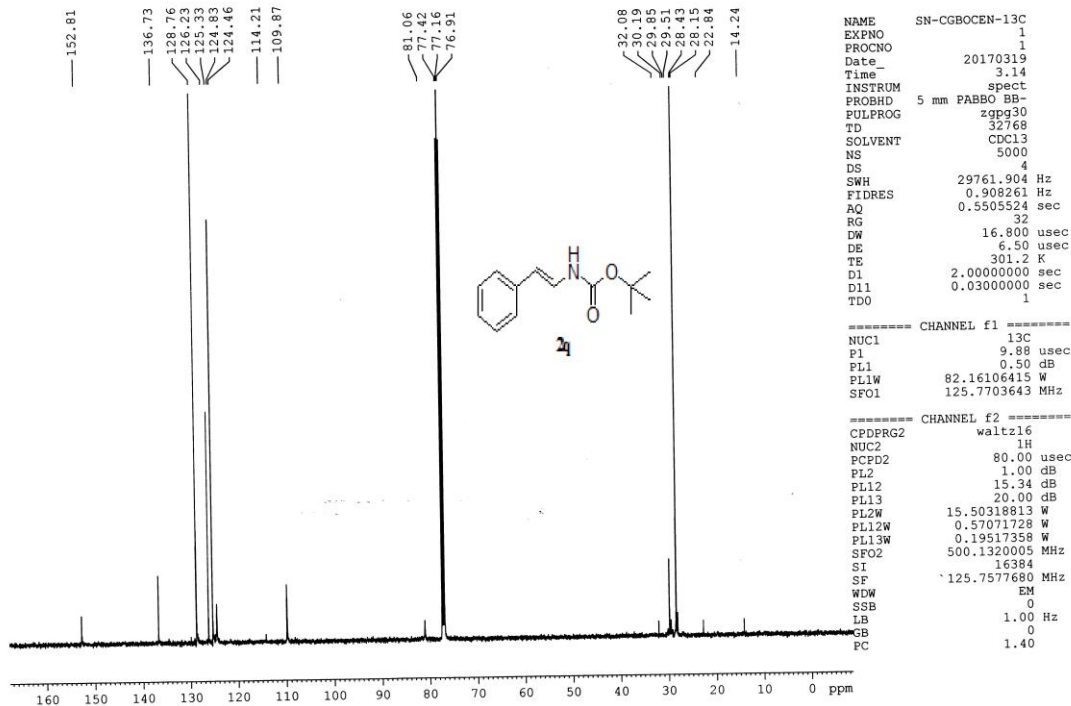

```

NAME SN-CGBOCEN-13C
EXPNO 1
PROCNO 1
Date_ 20170319
Time 3.14
INSTRUM spect
PROBHD 5 mm PABBO BB-
PULPROG zgpg30
TD 32768
SOLVENT CDCl3
NS 5000
DS 4
SWH 29761.904 Hz
FIDRES 0.908261 Hz
AQ 0.5505524 sec
RG 32
DW 16.800 usec
DE 6.50 usec
TE 301.2 K
D1 2.0000000 sec
D11 0.0300000 sec
TDO 1

```

```

===== CHANNEL f1 =====
NUC1 13C
P1 9.88 usec
PL1 0.50 dB
PL1W 82.16106415 W
SFO1 125.7703643 MHz

```

```

===== CHANNEL f2 =====
CPDPRG2 waltz16
NUC2 1H
PCPD2 80.00 usec
PL2 1.00 dB
PL12 15.34 dB
PL13 20.00 dB
PL2W 15.50318813 W
PL12W 0.57071728 W
PL13W 0.19517358 W
SFO2 500.1320005 MHz
SI 16384
SF 125.7577680 MHz
WDW EM
SSB 0
LB 1.00 Hz
GB 0
PC 1.40

```

<sup>1</sup>H NMR (600MHz, CDCl<sub>3</sub>)  
2r

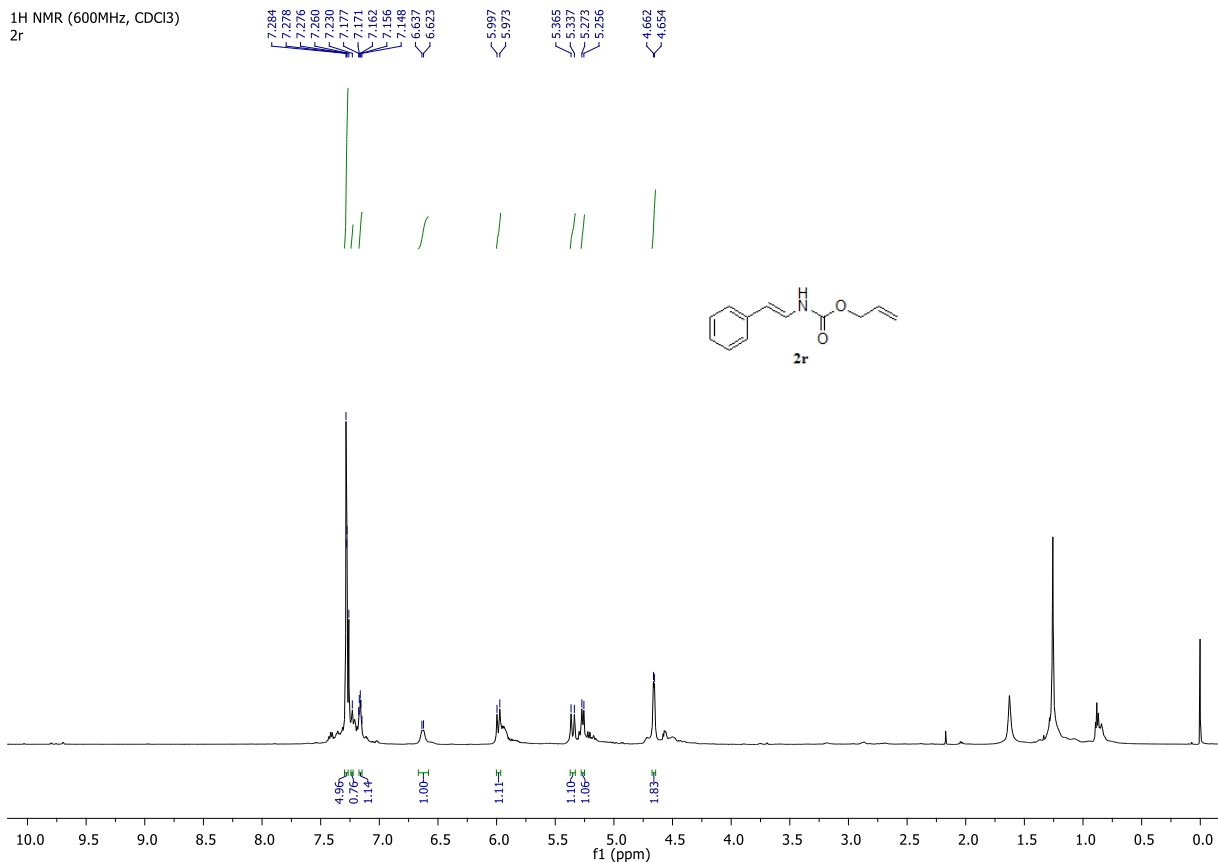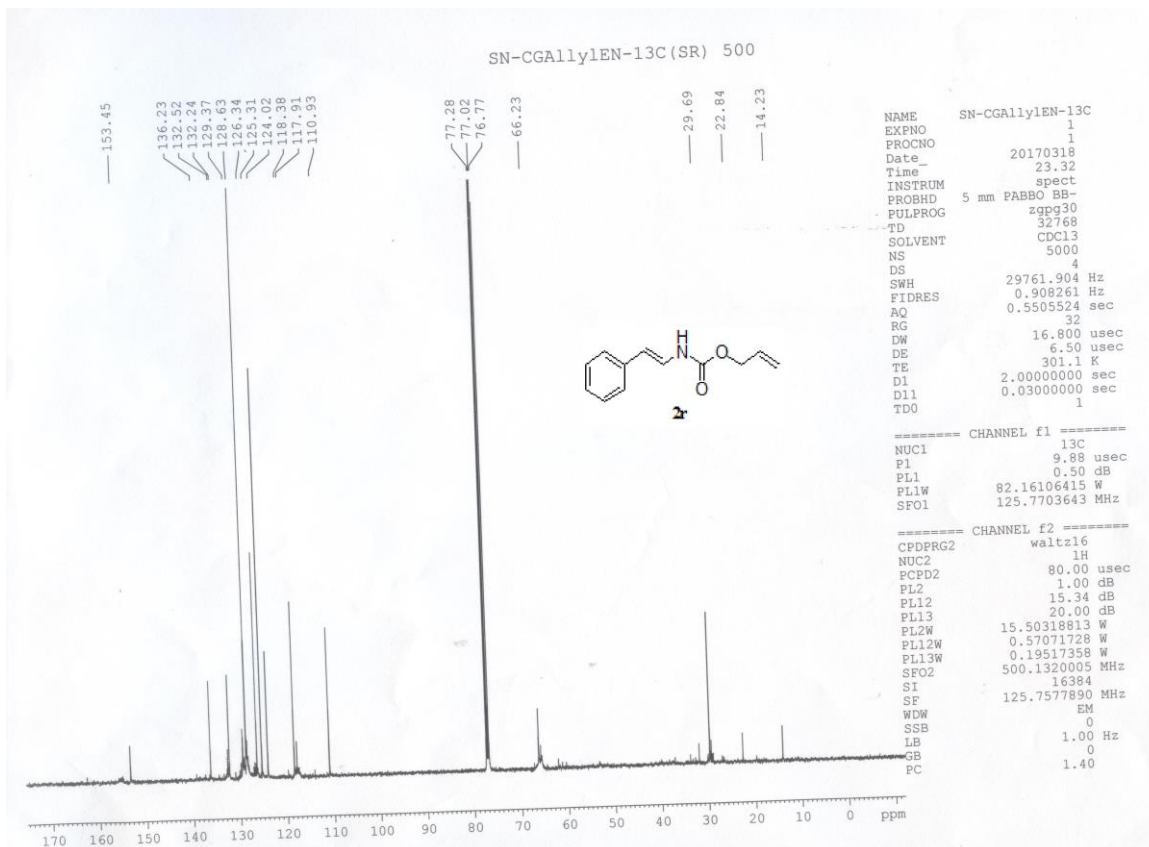

<sup>1</sup>H NMR (400MHz, CDCl<sub>3</sub>)  
2s

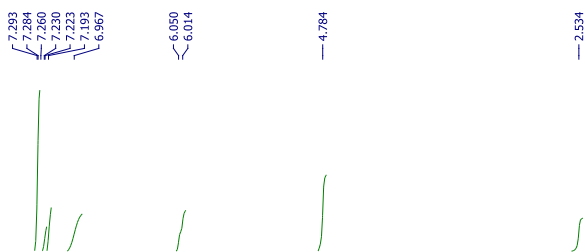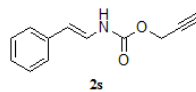

<sup>13</sup>C NMR (100 MHz, CDCl<sub>3</sub>)  
2s

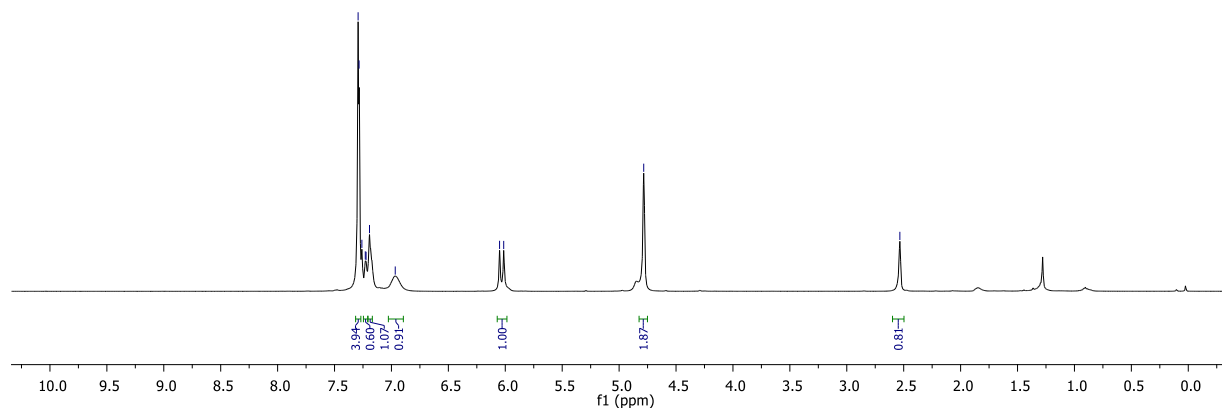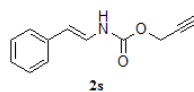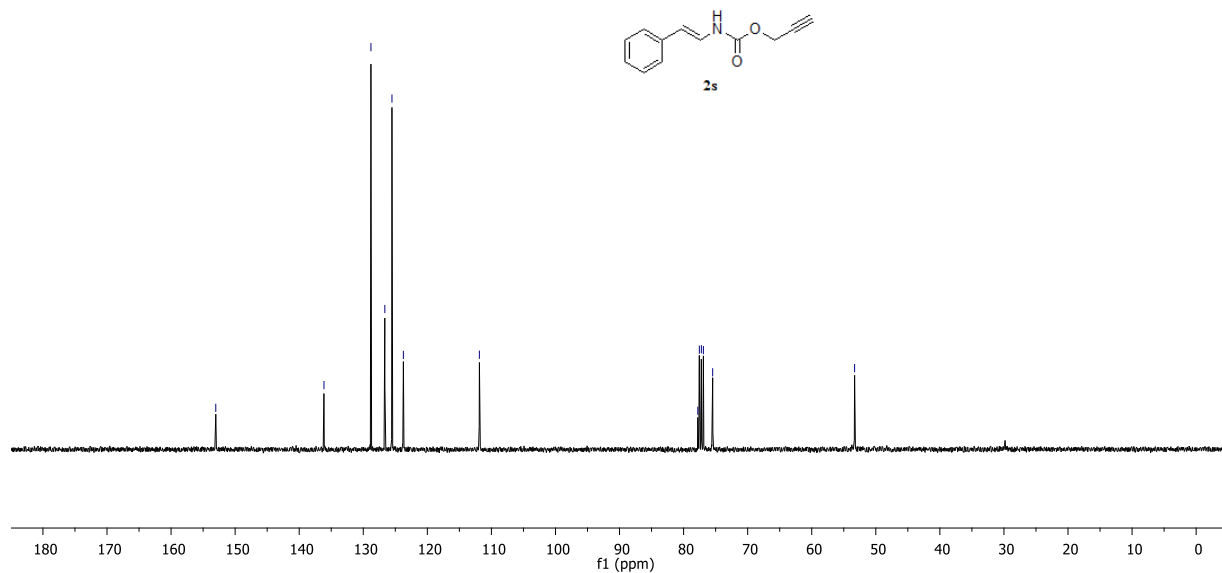

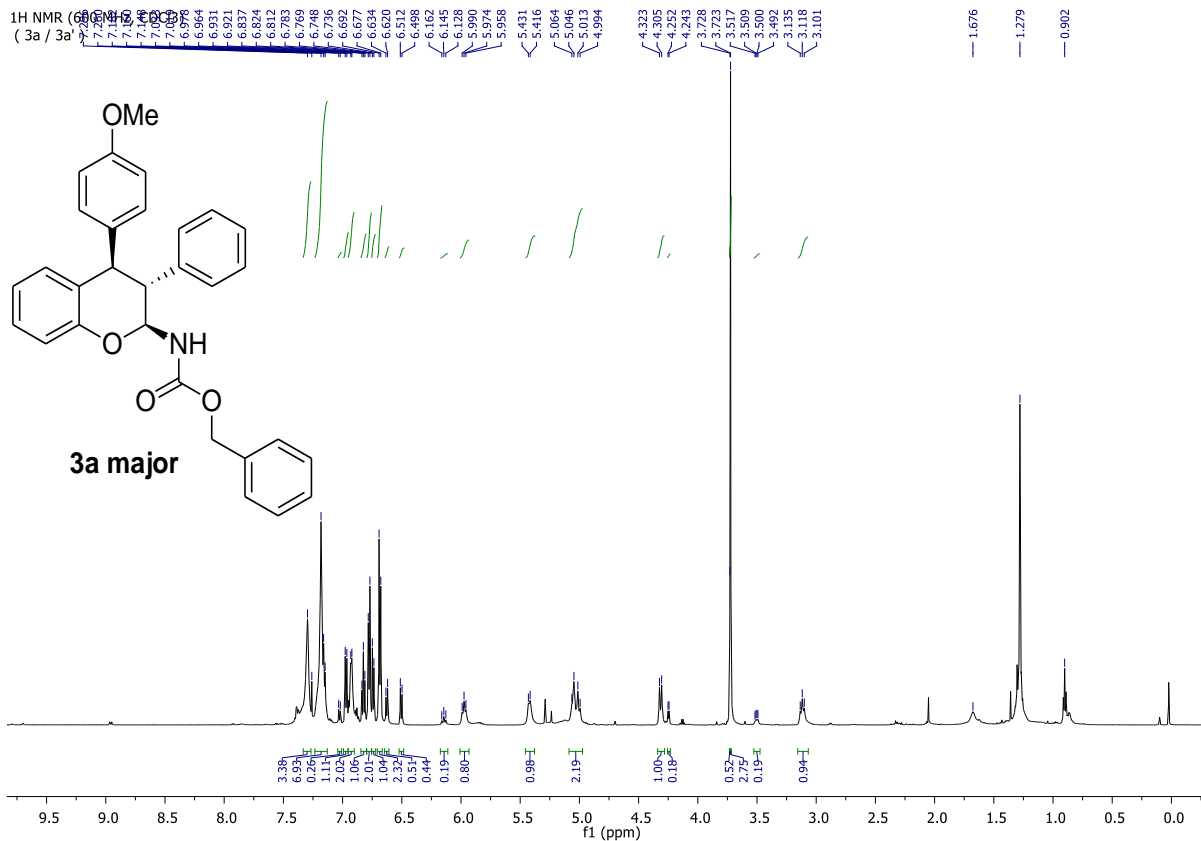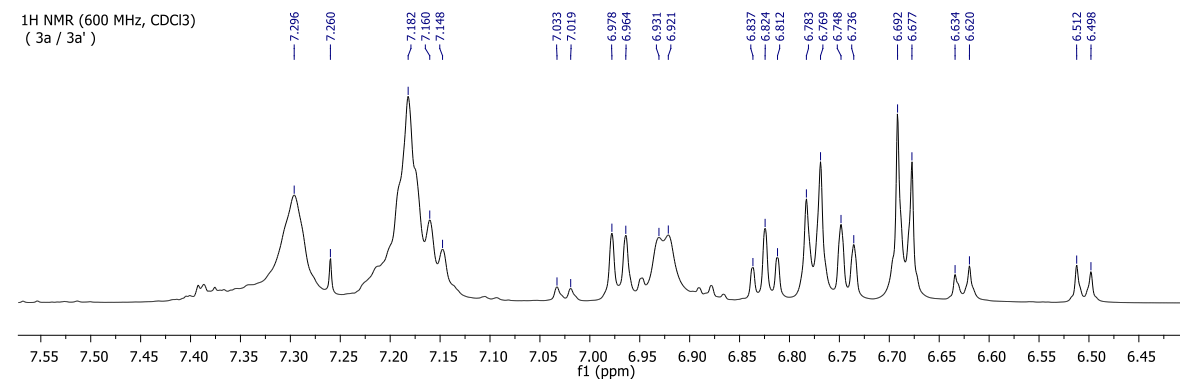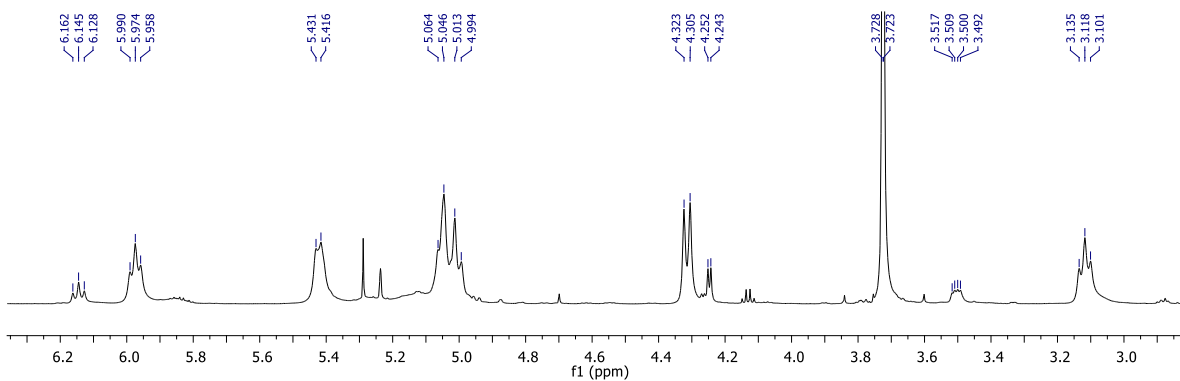

<sup>13</sup>C NMR (150 MHz, CDCl<sub>3</sub>)  
(3a / 3a')

158.43  
155.50  
154.02  
138.79  
136.40  
136.02  
130.14  
128.85  
128.69  
128.36  
128.34  
128.10  
127.33  
126.17  
121.30  
118.20  
113.85

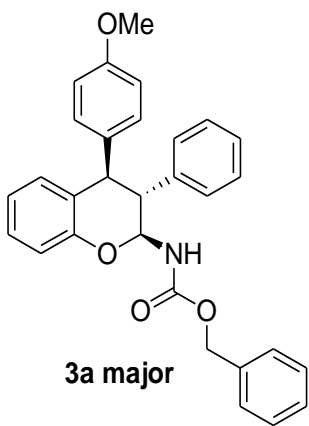

82.09  
77.44  
77.02  
67.22  
55.31  
53.02  
50.77  
32.13  
29.91  
22.90  
14.34

<sup>1</sup>H NMR (600 MHz, CDCl<sub>3</sub>)  
(3b / 3b')

7.751  
7.745  
7.738  
7.732  
7.726  
7.720  
6.980  
6.967  
6.954  
6.954  
6.823  
6.812  
6.802  
6.790  
6.776  
6.732  
6.719  
6.694  
6.680  
6.639  
6.625  
6.575  
6.118  
6.102  
6.084  
5.927  
5.336  
5.057  
5.024  
4.301  
4.290  
4.288  
4.219  
3.731  
3.091  
3.075  
3.059  
2.294  
2.274  
1.626  
1.270  
0.896

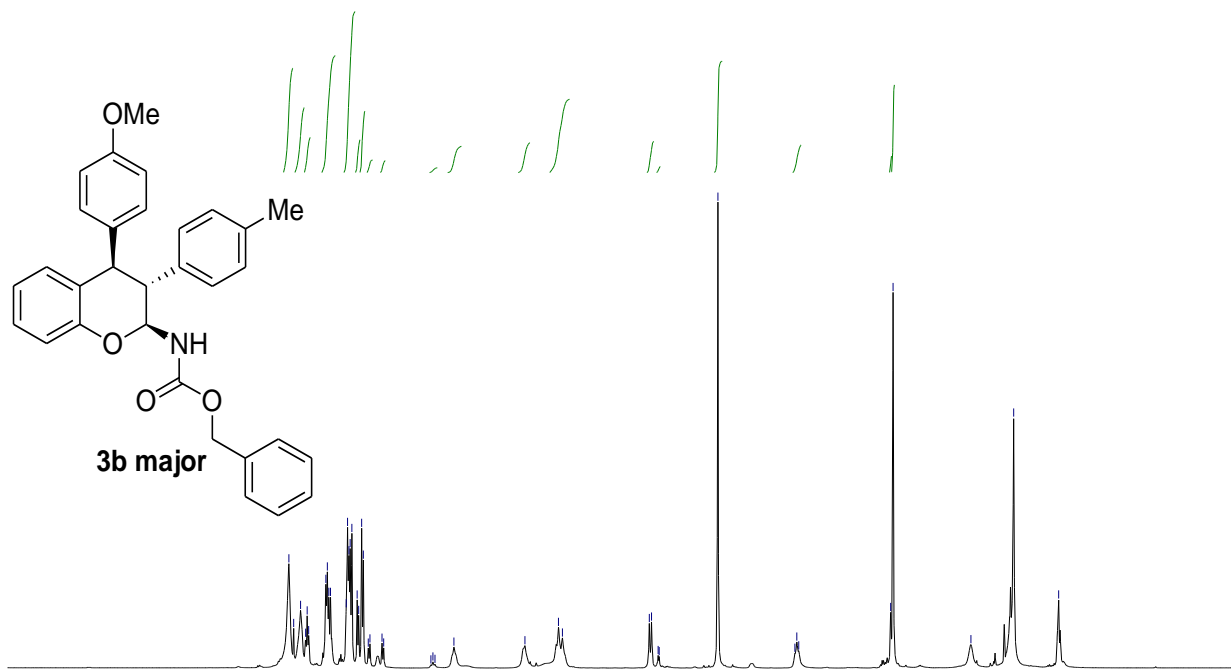

3.36  
2.08  
1.13  
3.76  
5.17  
1.06  
1.98  
0.40  
0.39  
0.16  
0.85  
0.96  
2.34  
1.00  
0.20  
3.57  
0.89  
0.53  
2.82



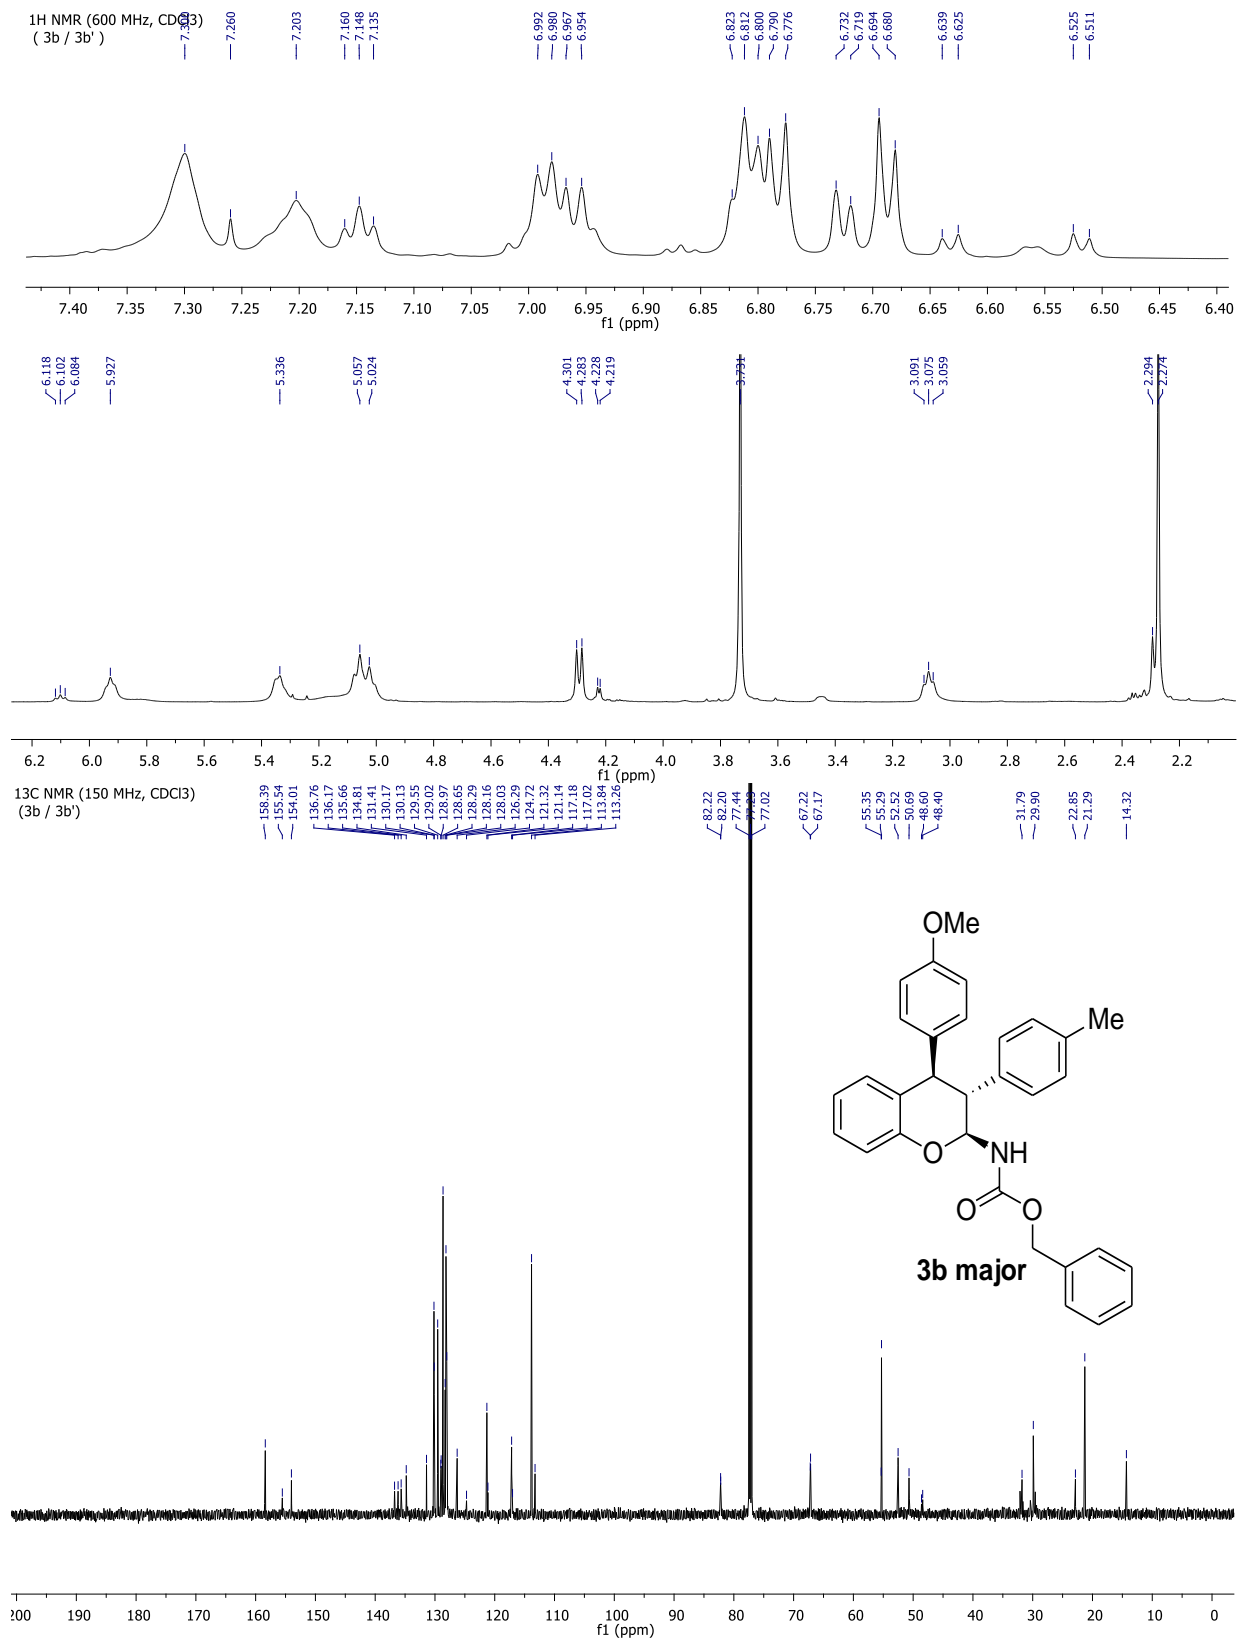

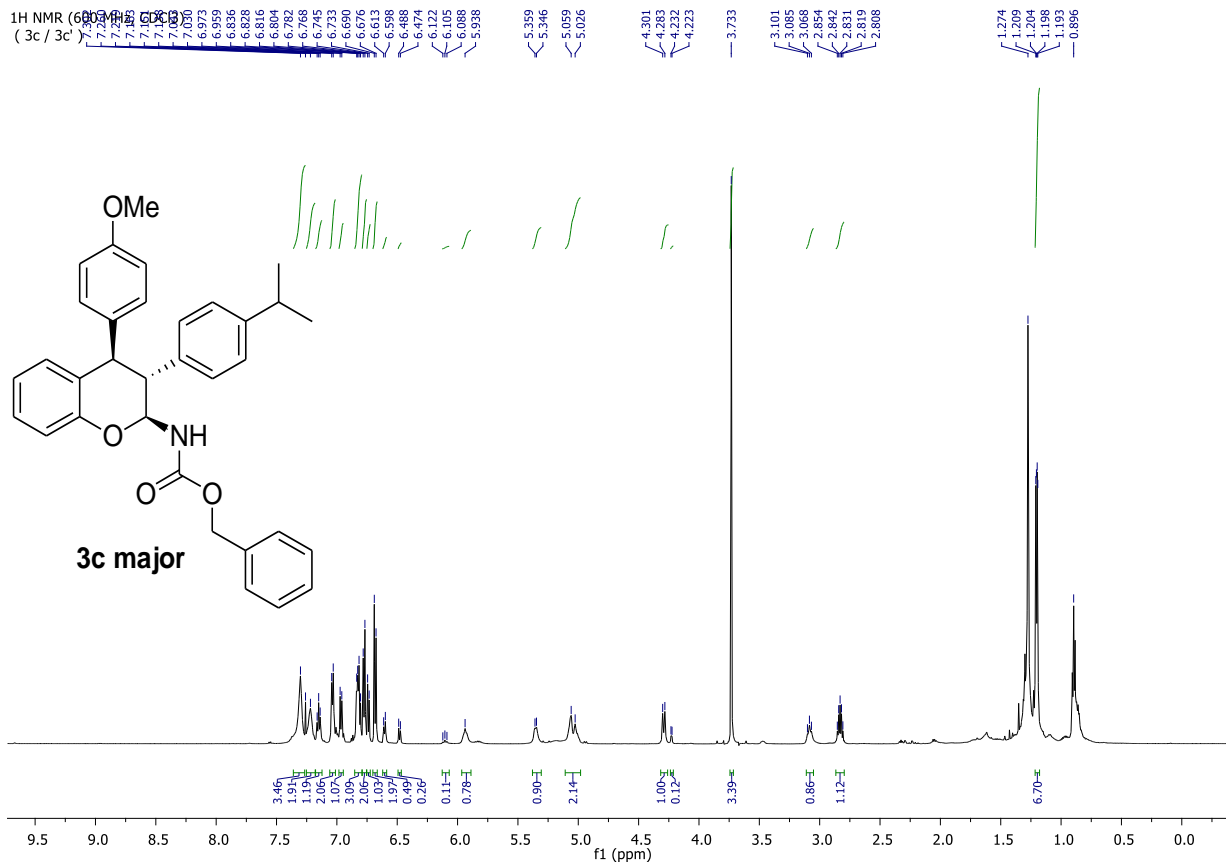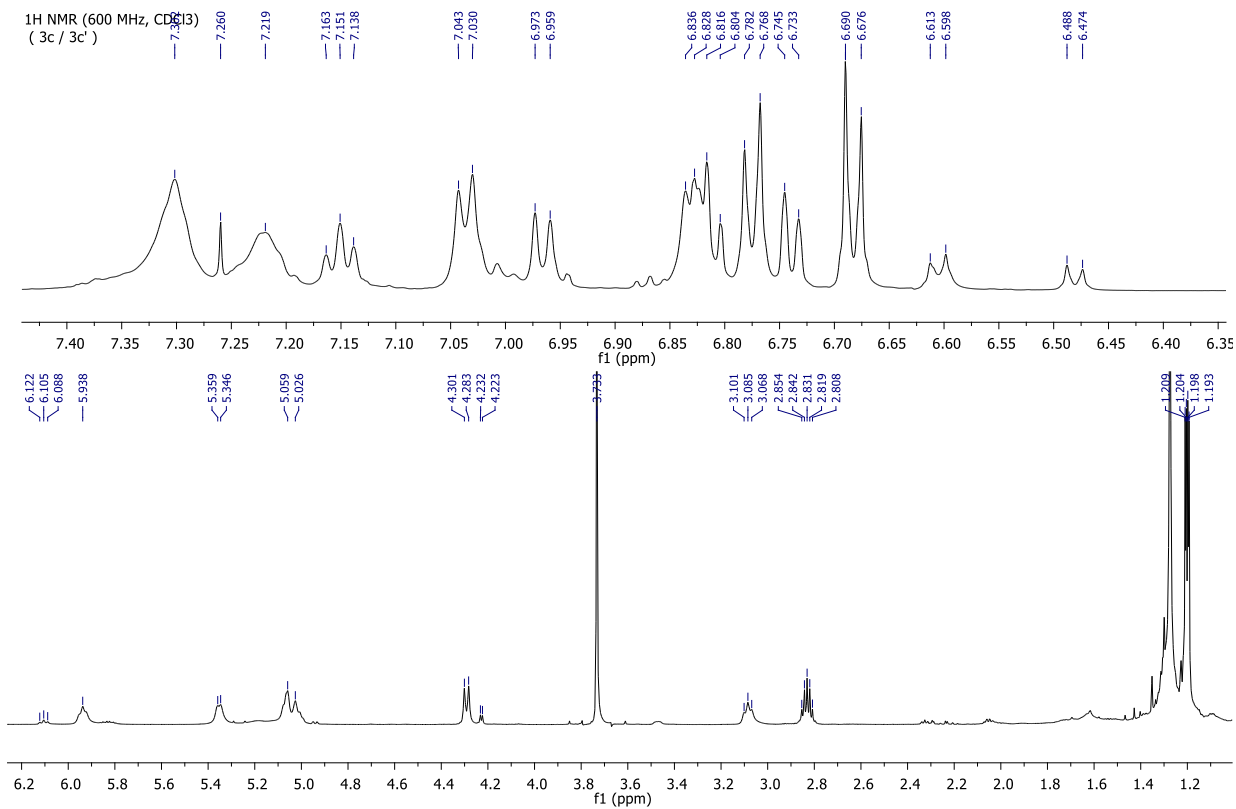

13C NMR (150 MHz, CDCl3)  
(3c / 3c')

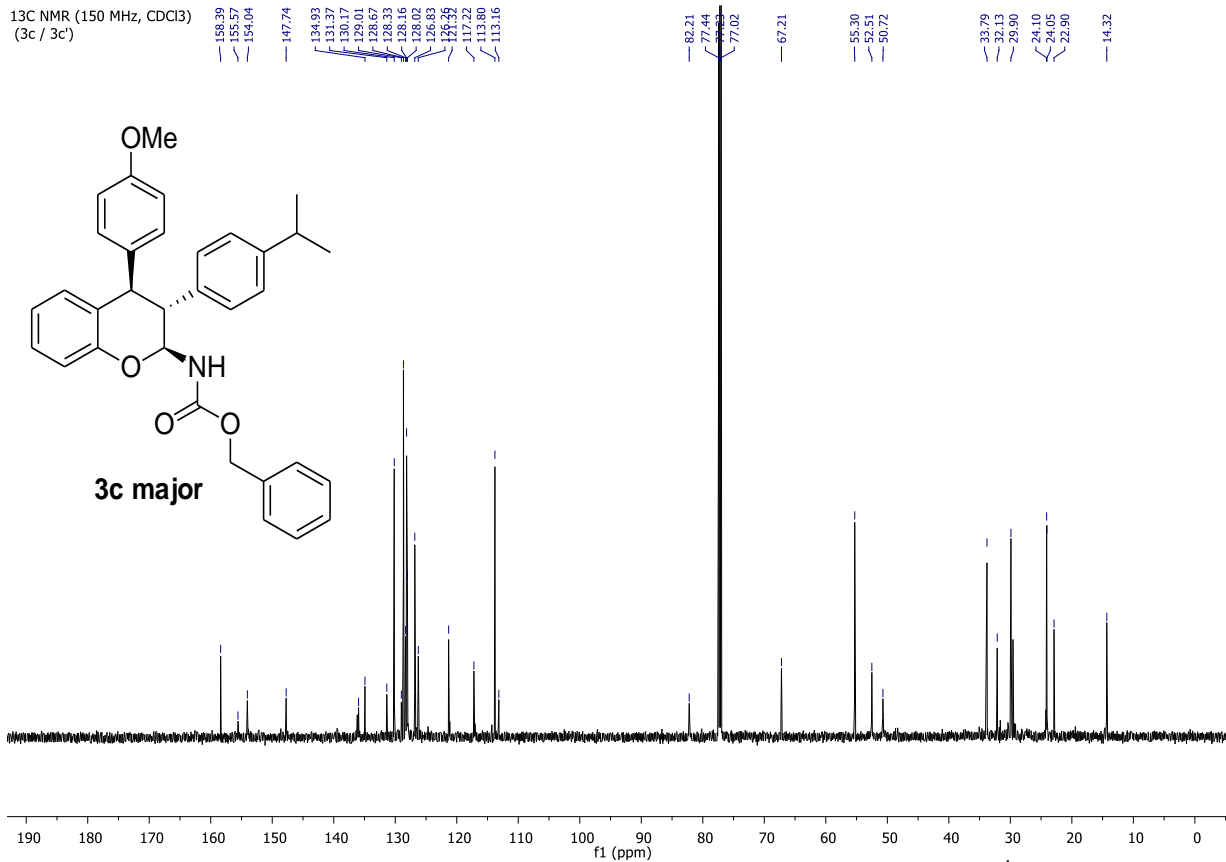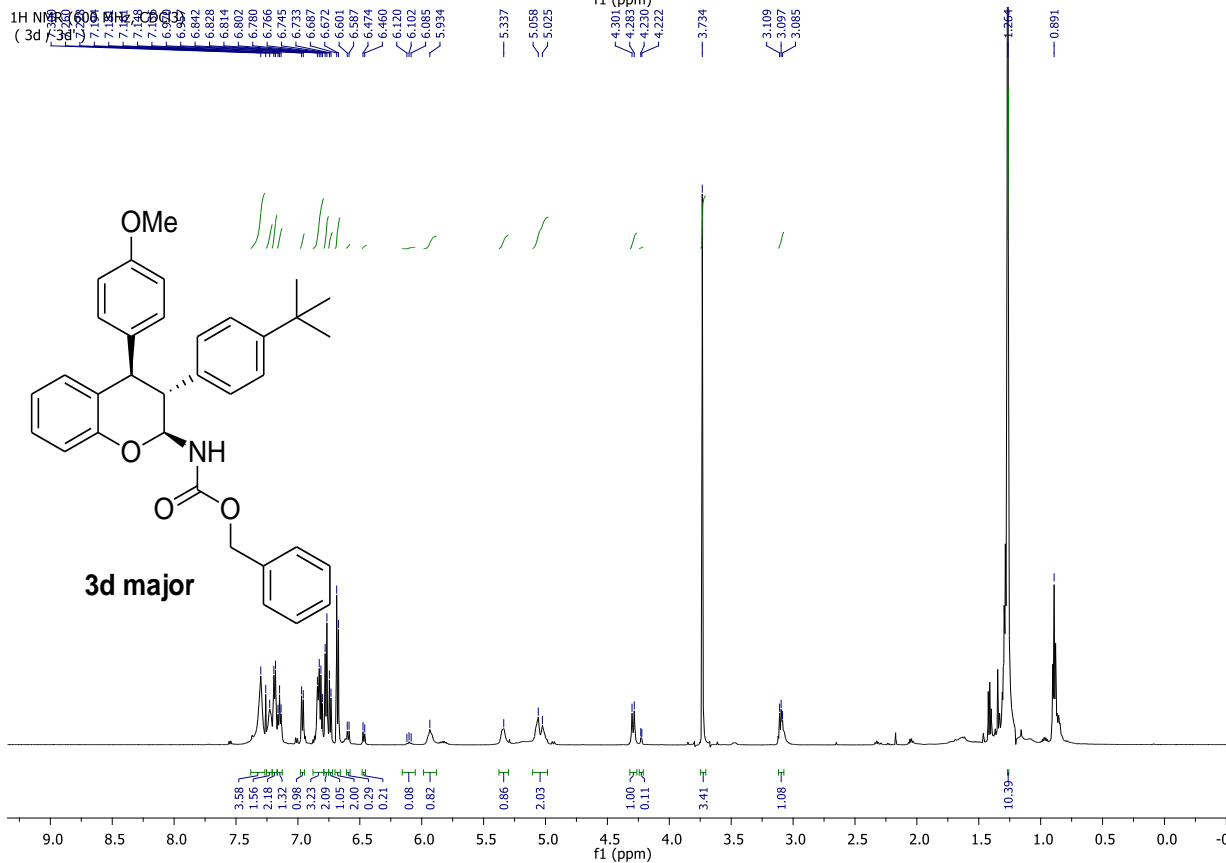

<sup>1</sup>H NMR (600 MHz, CDCl<sub>3</sub>)  
(3d / 3d')

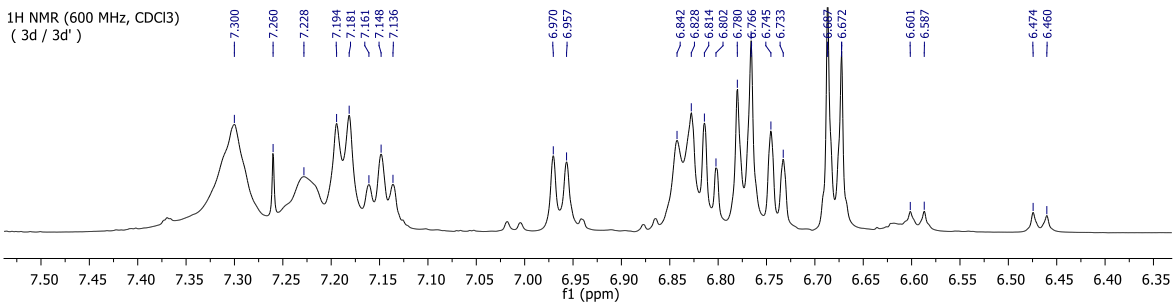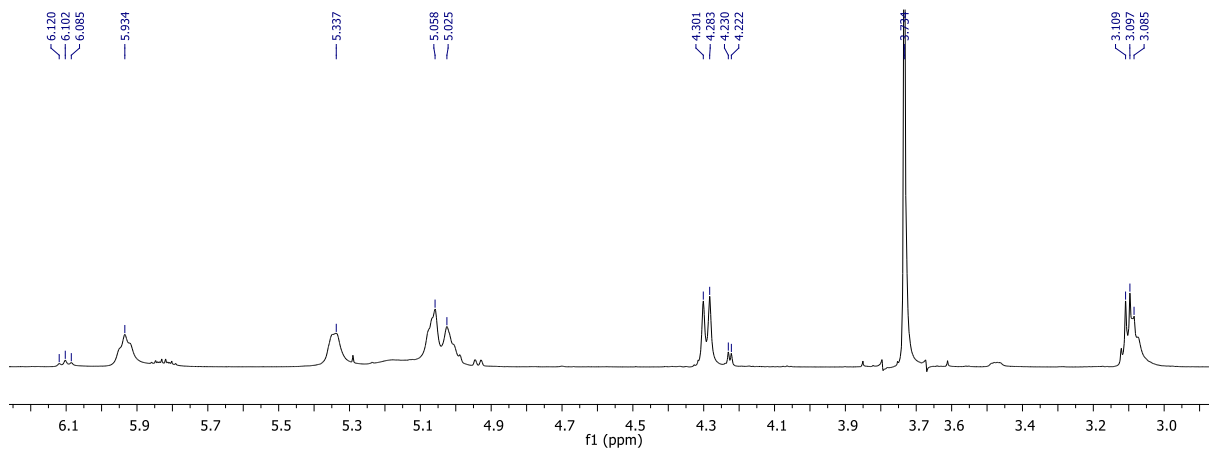

<sup>13</sup>C NMR (150 MHz, CDCl<sub>3</sub>)  
(3d / 3d')

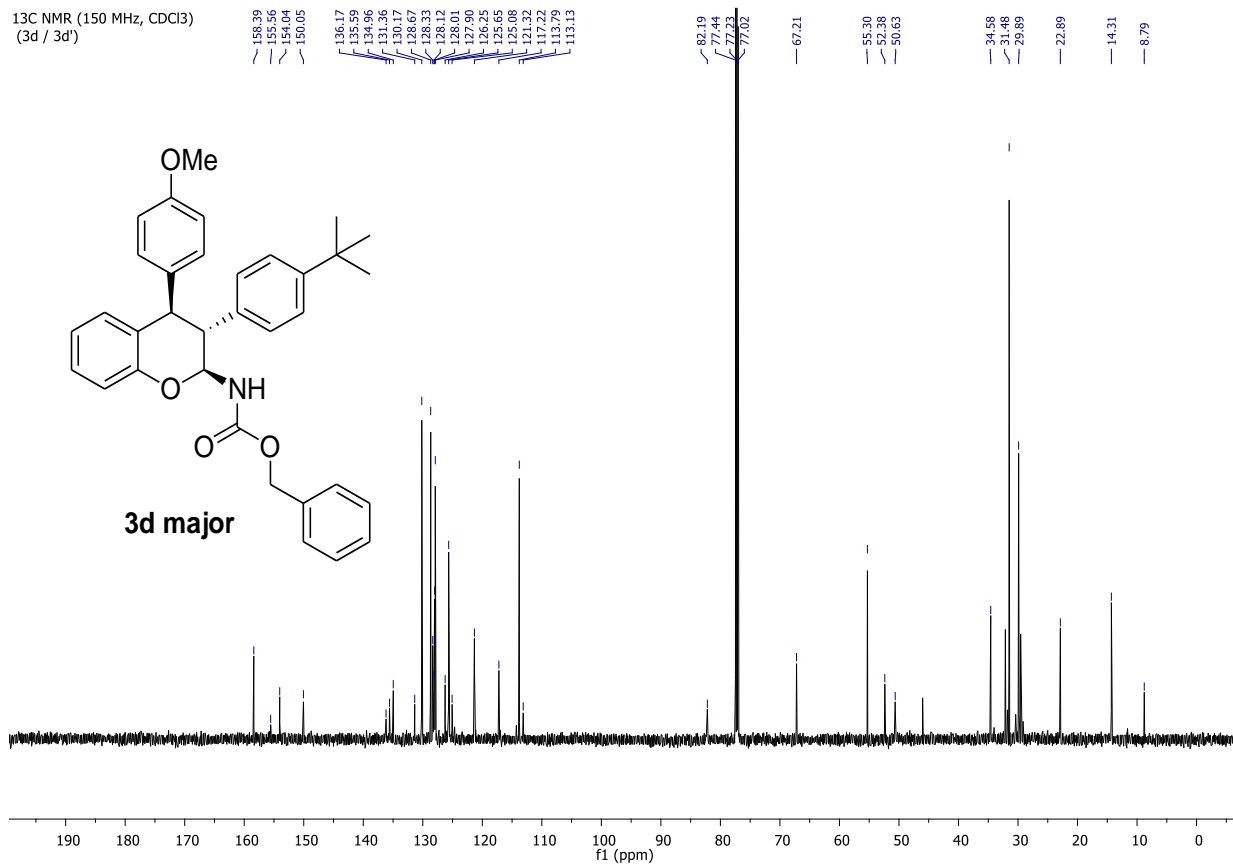

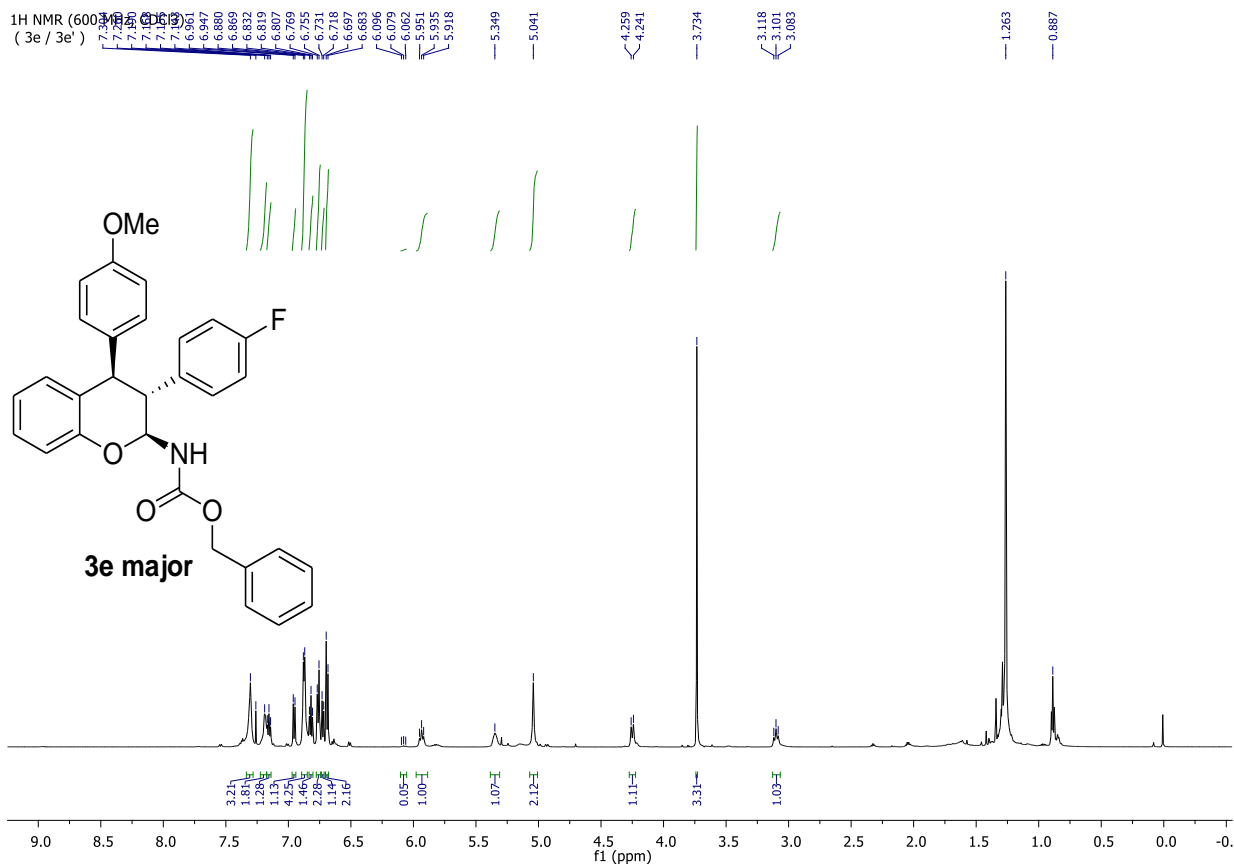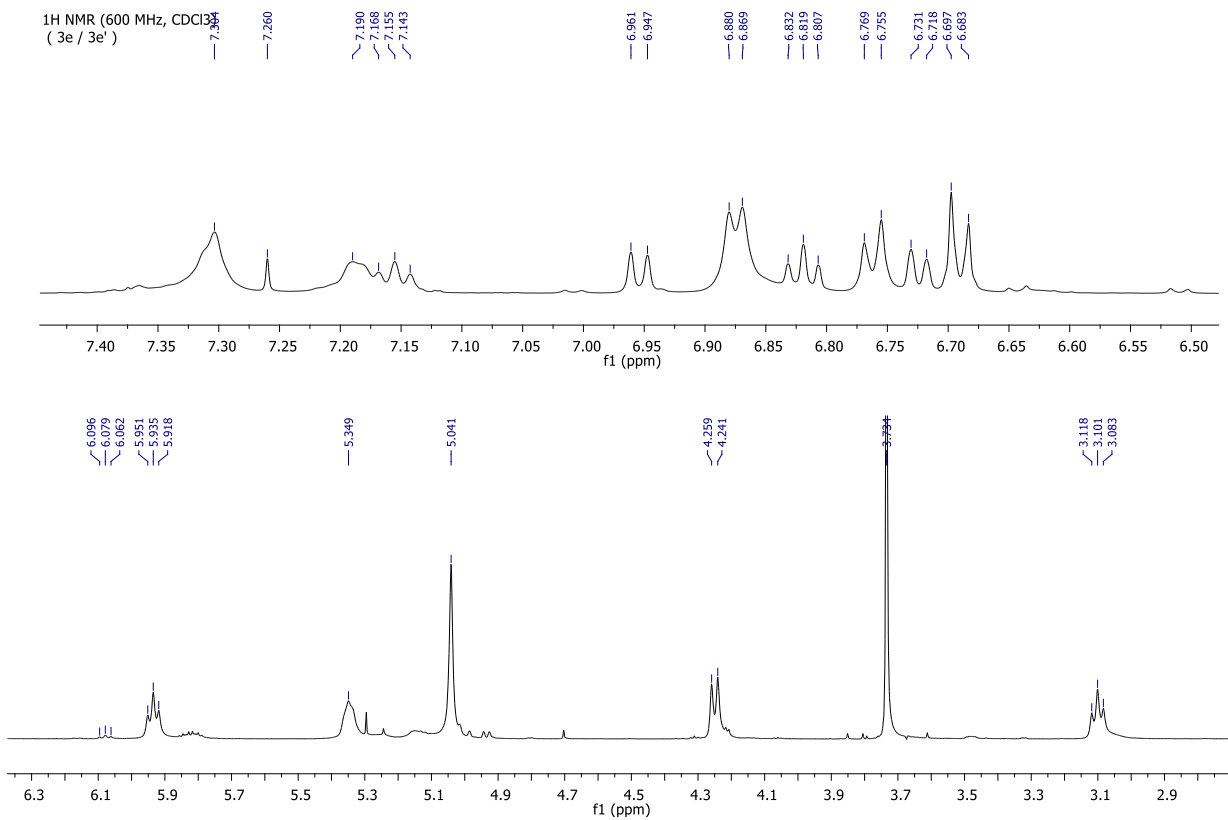



<sup>1</sup>H NMR (600 MHz, CDCl<sub>3</sub>)  
(3f / 3f')

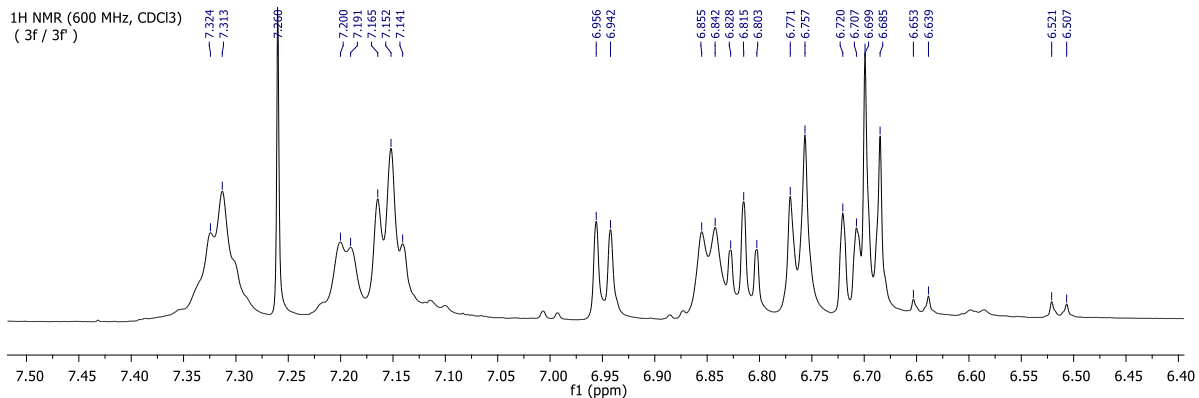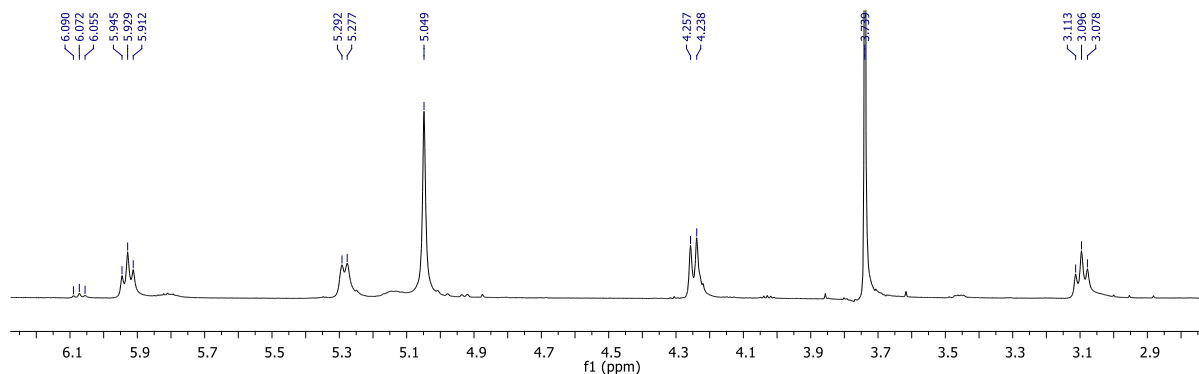

<sup>13</sup>C NMR (150 MHz, CDCl<sub>3</sub>)  
(3f / 3f')

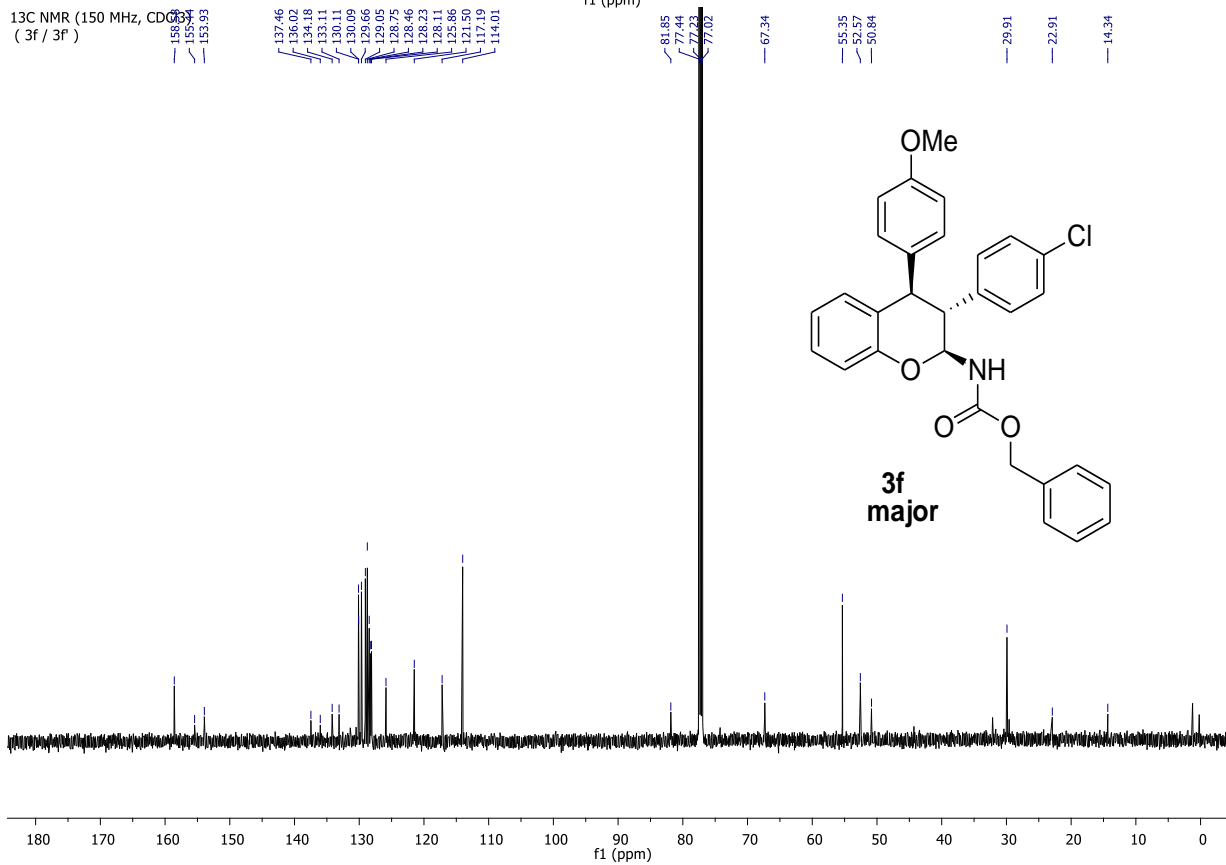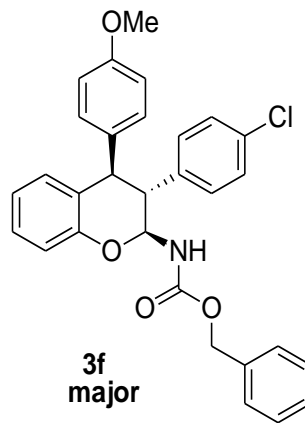

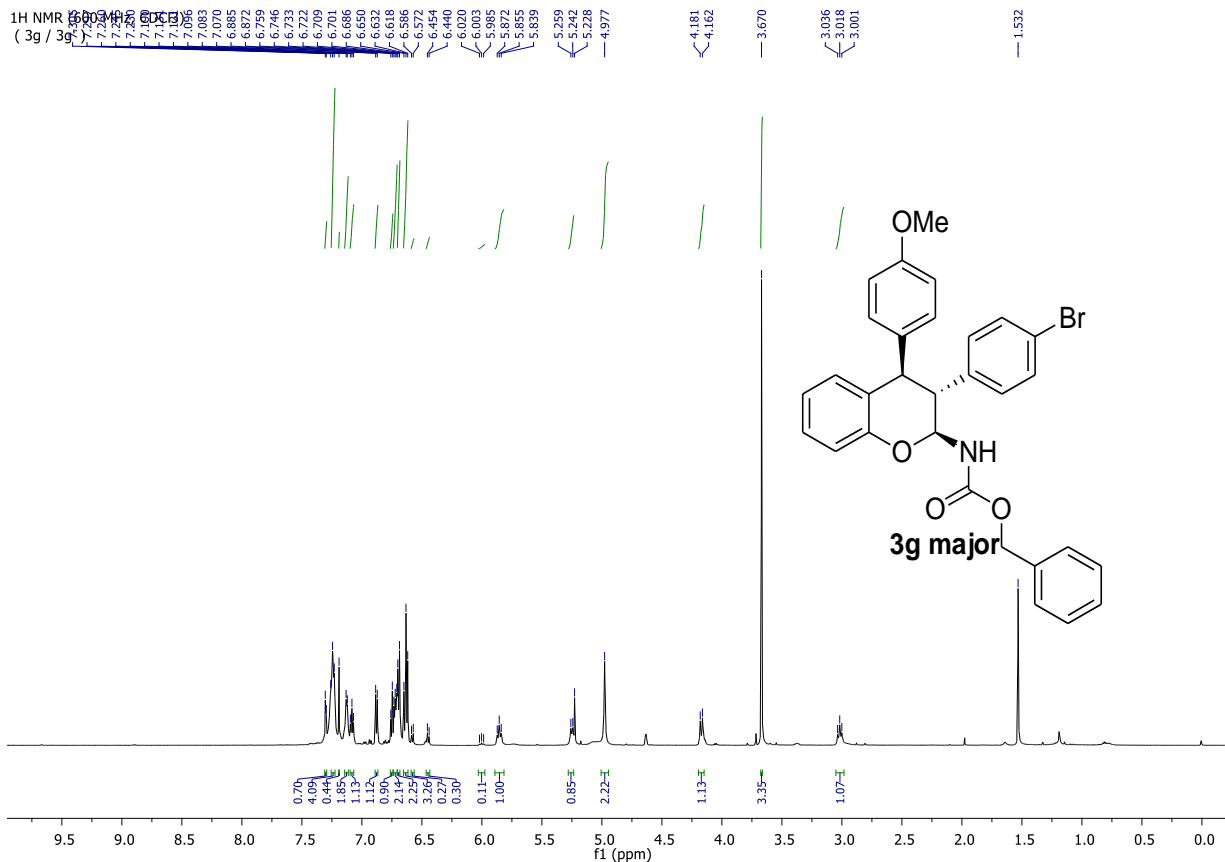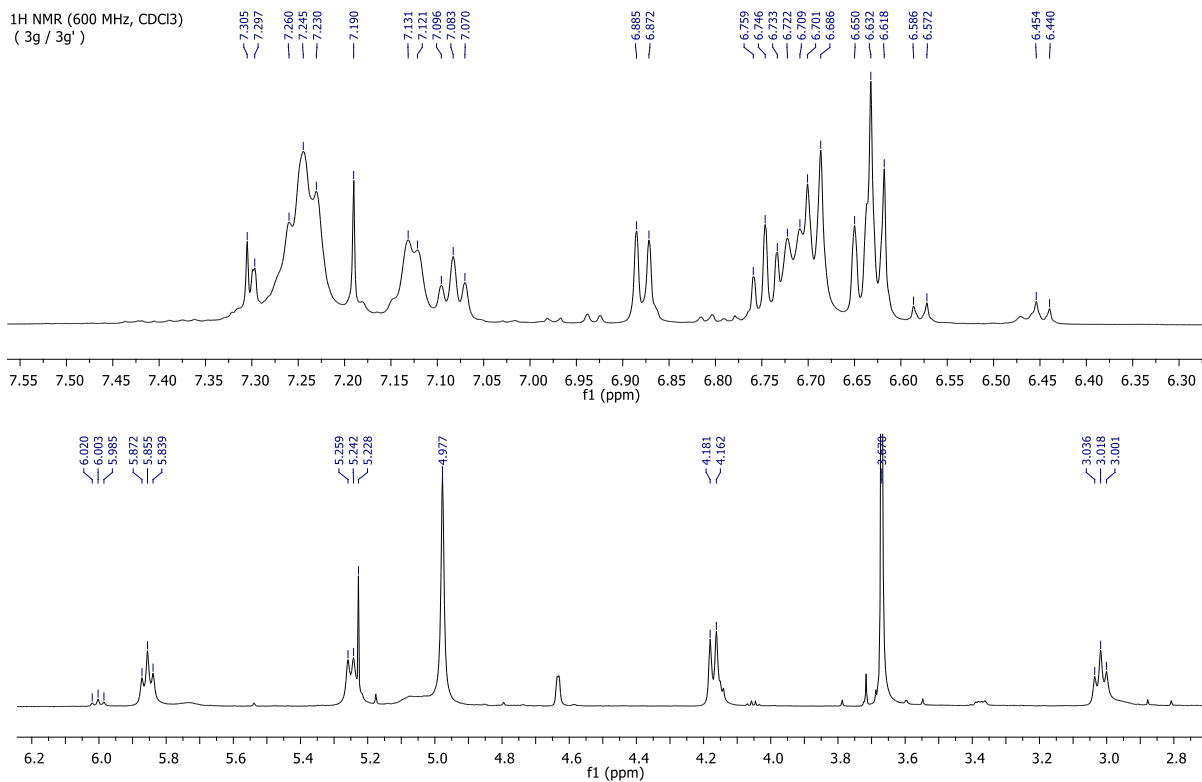



<sup>13</sup>C NMR (150 MHz, CDCl<sub>3</sub>)  
(3g)

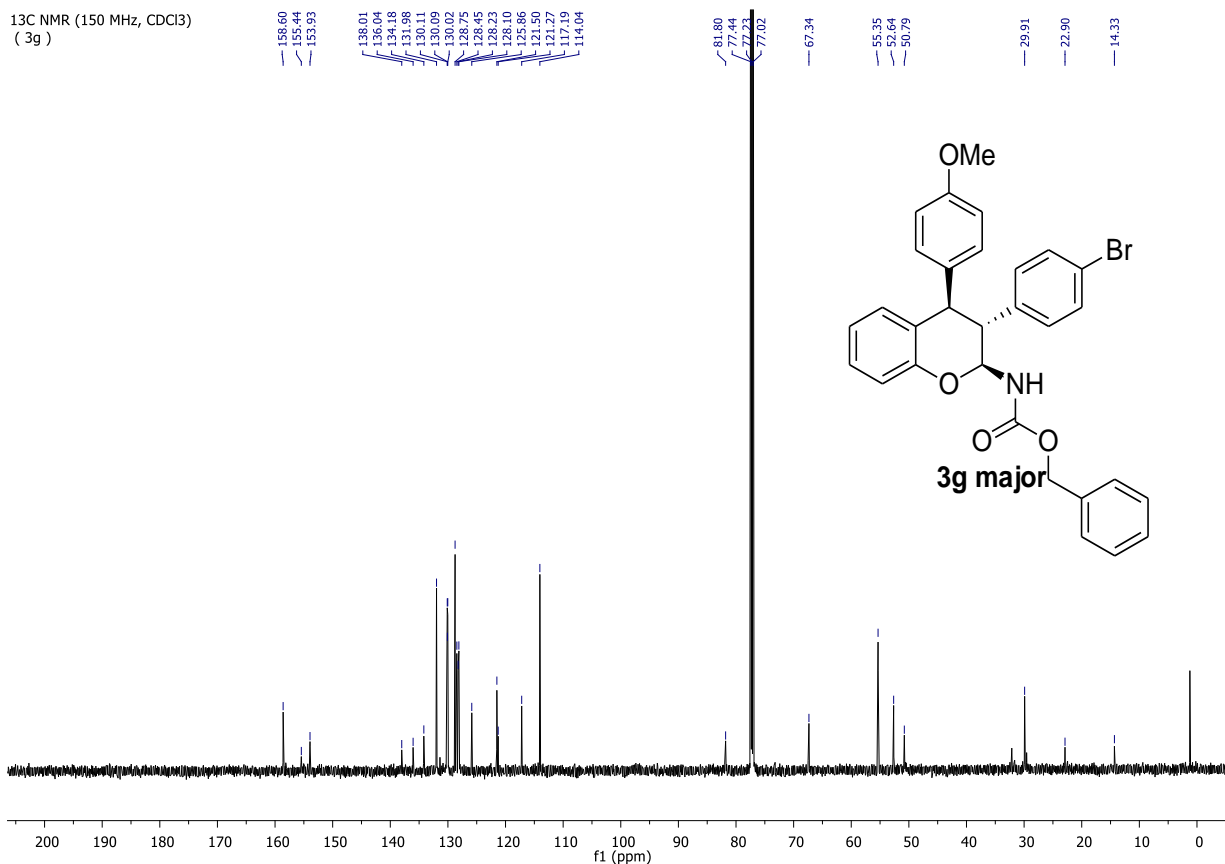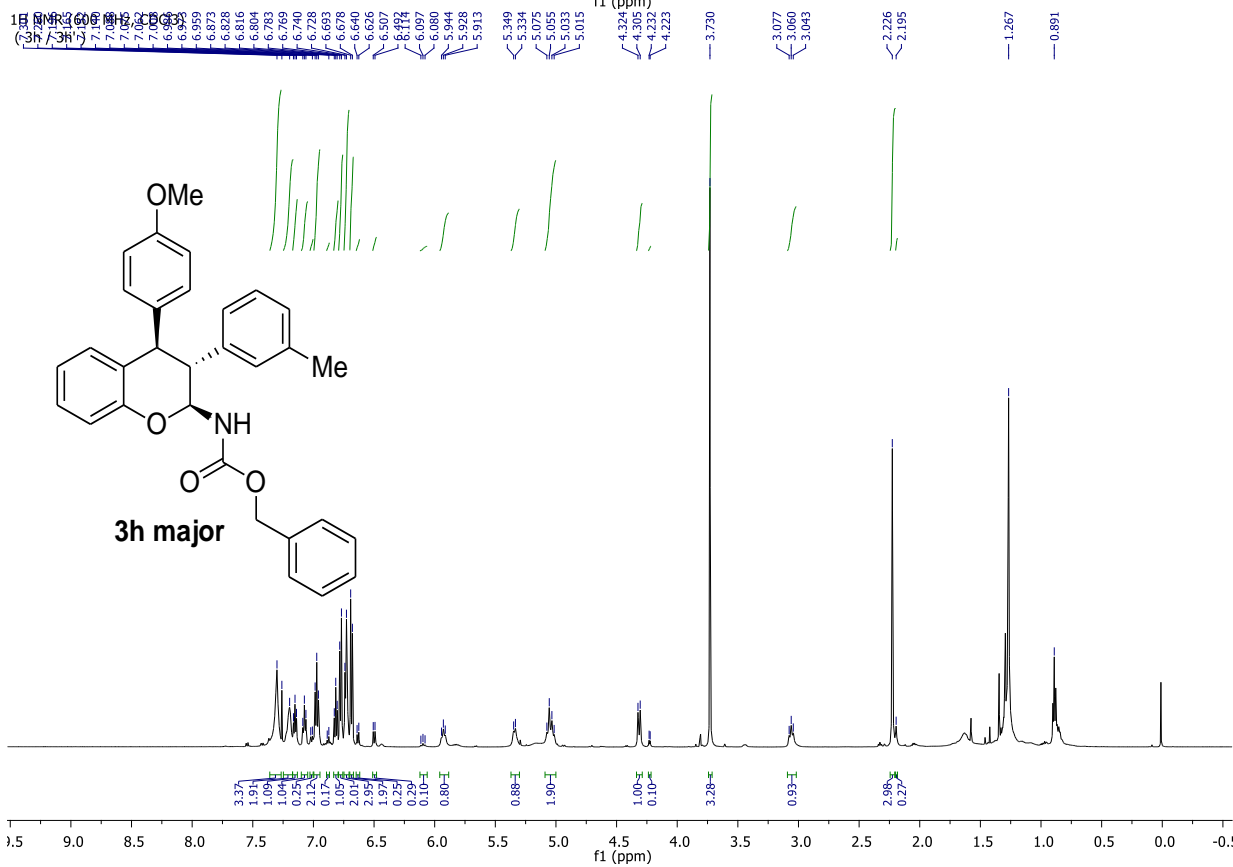

<sup>1</sup>H NMR (600 MHz, CDCl<sub>3</sub>)  
(3h / 3h')

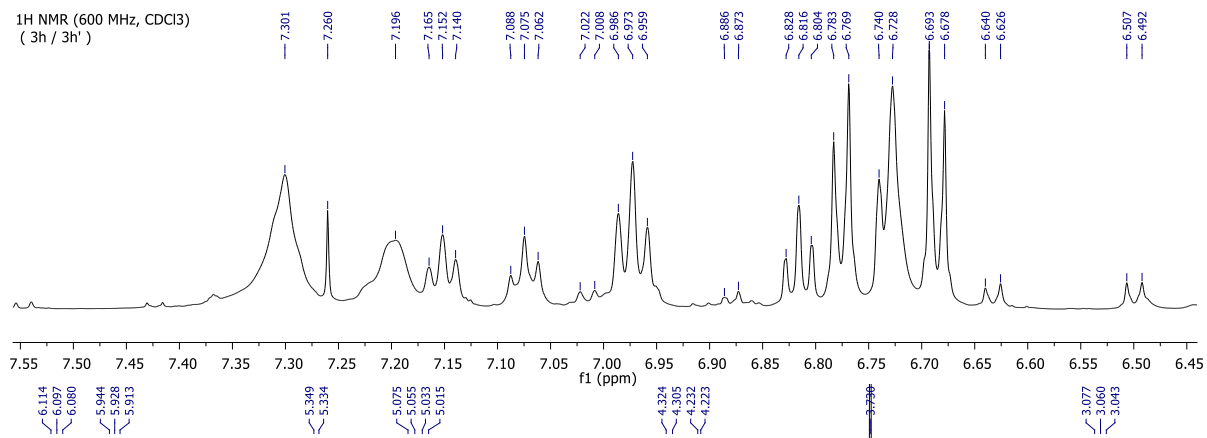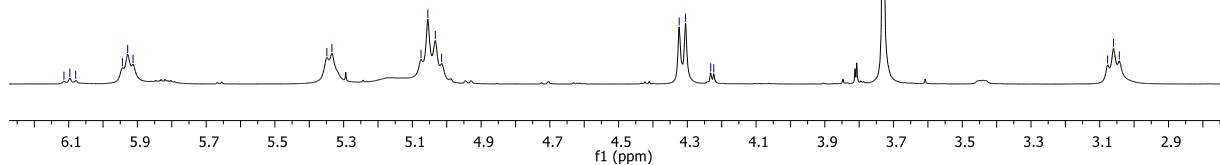

<sup>13</sup>C NMR (150 MHz, CDCl<sub>3</sub>)  
(3h / 3h')

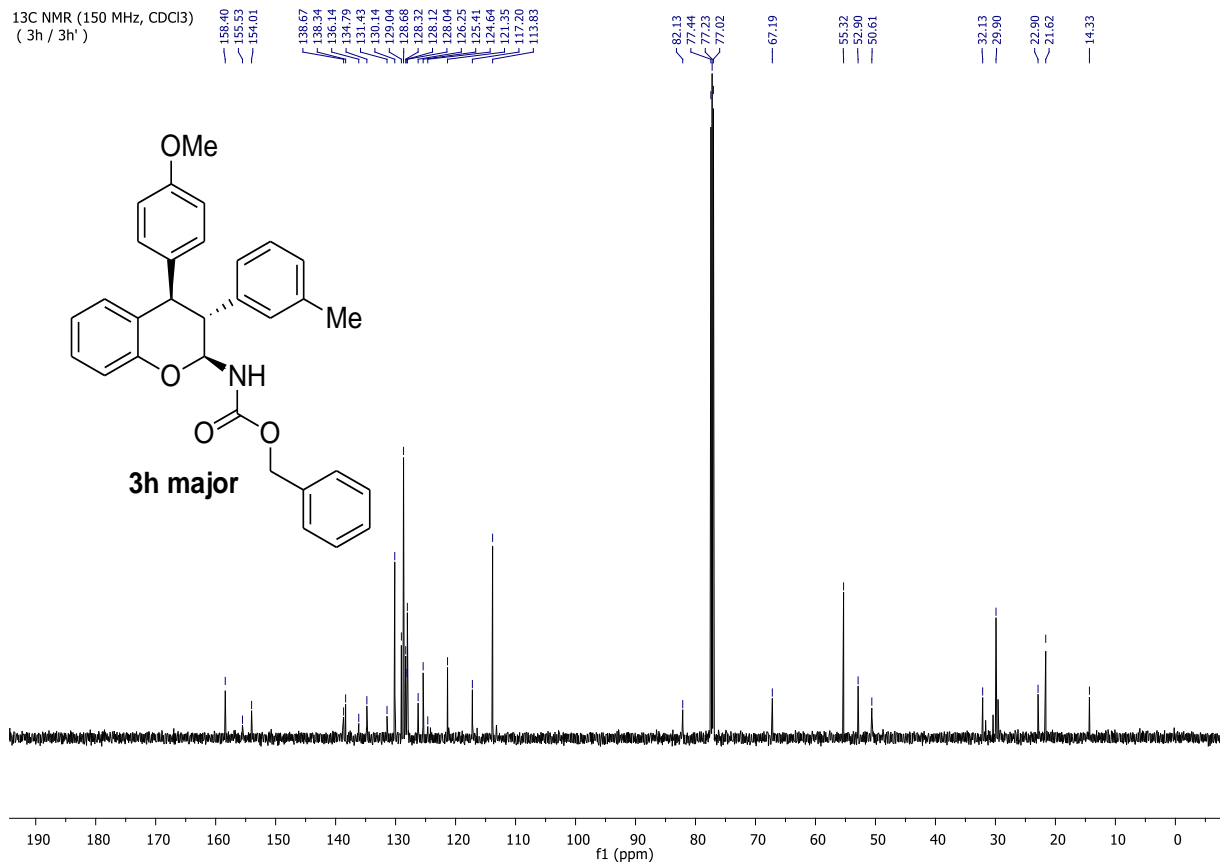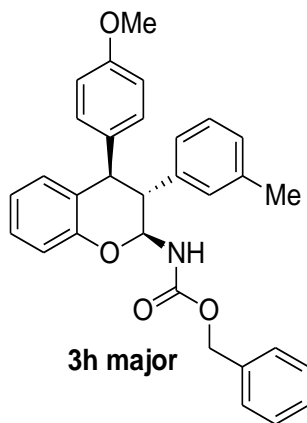

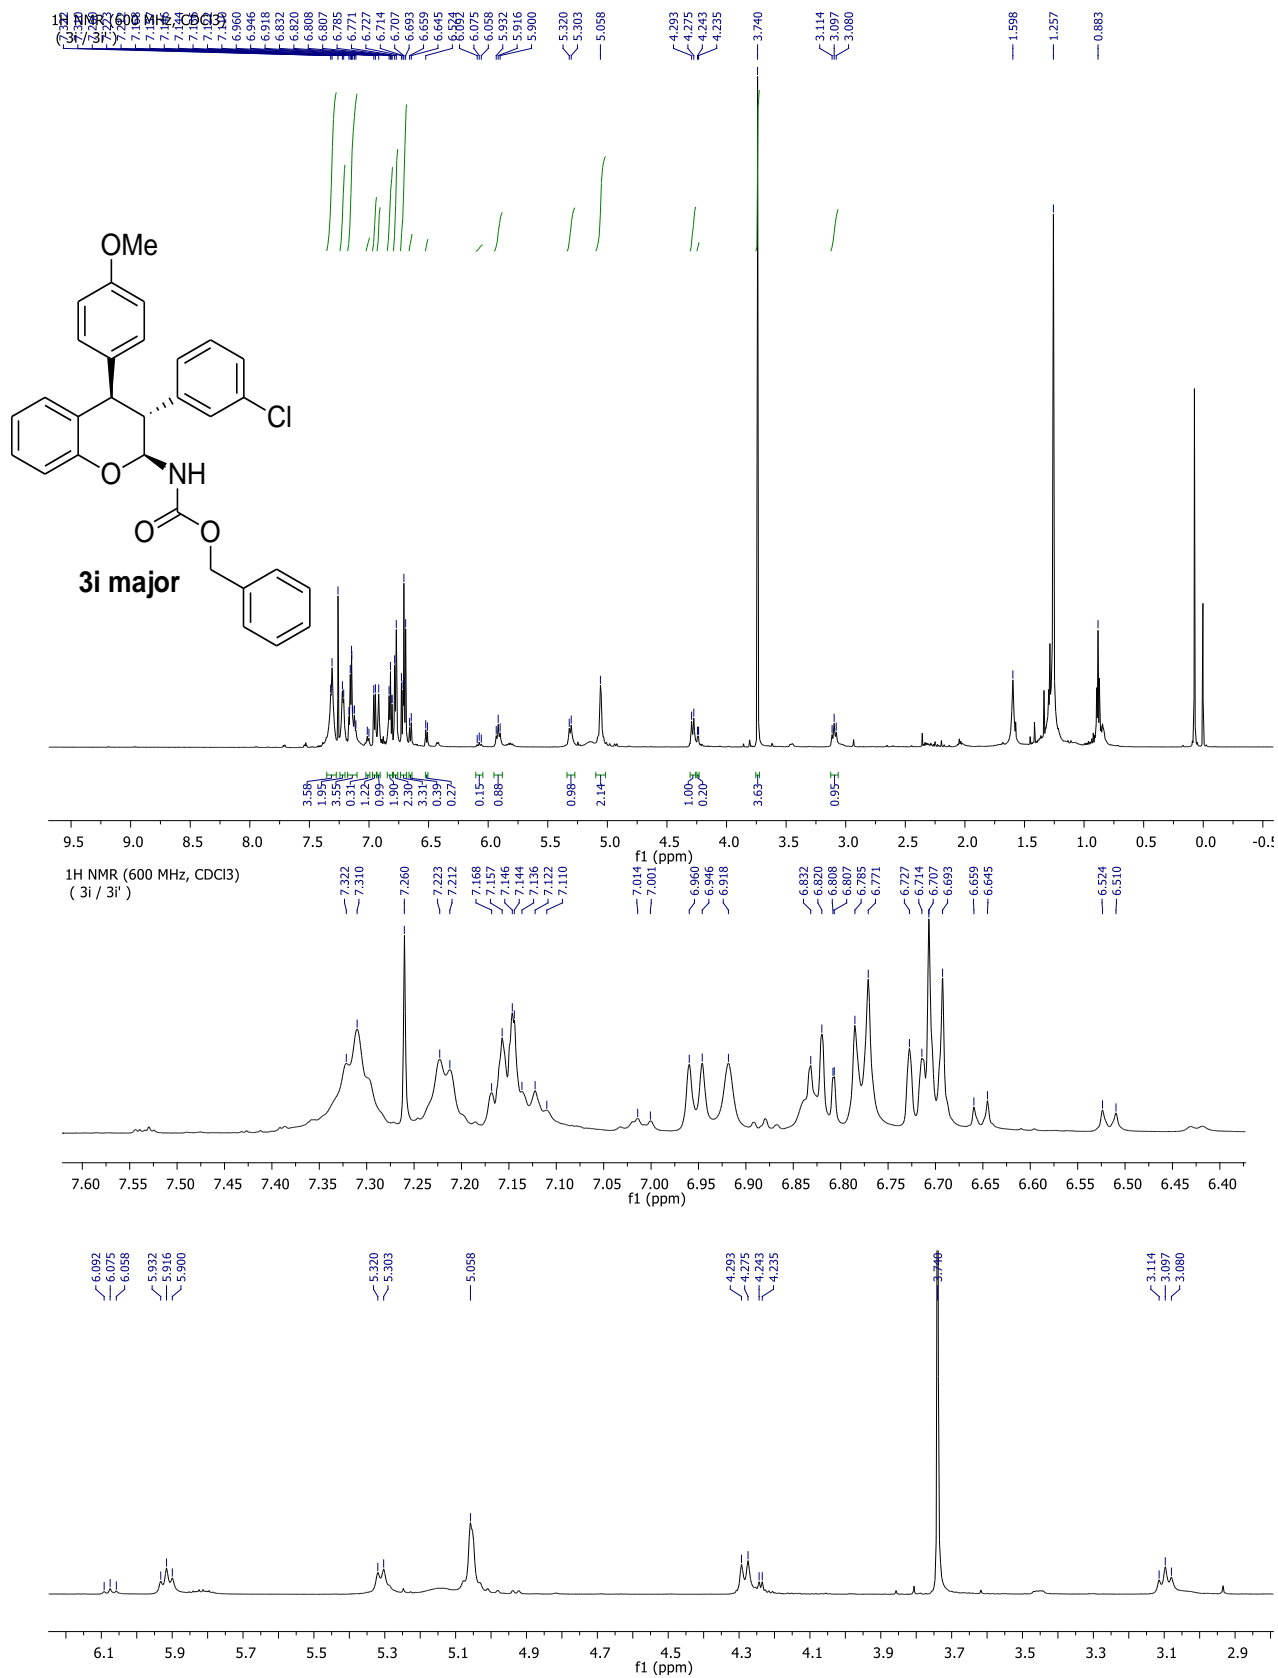

<sup>13</sup>C NMR (150 MHz, CDCl<sub>3</sub>)  
(3i / 3i')

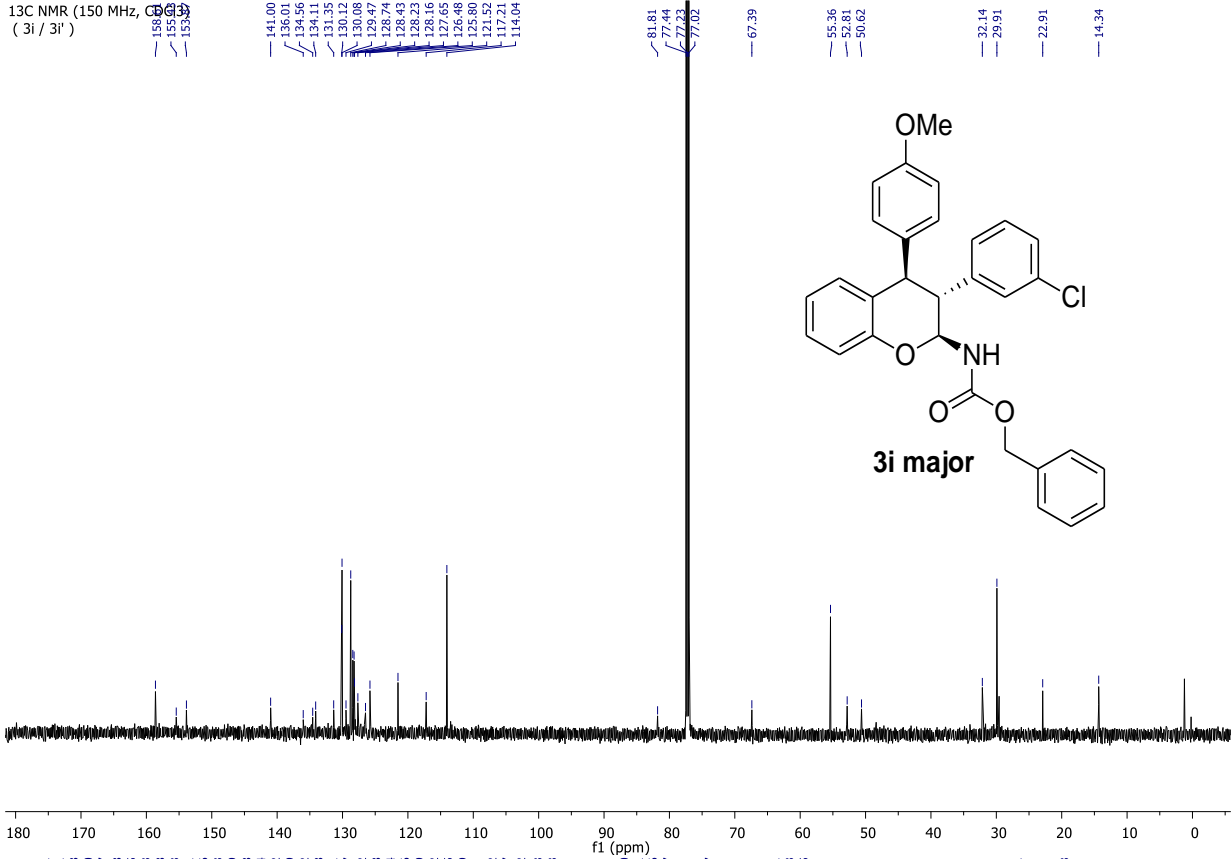

<sup>1</sup>H NMR (300 MHz, CDCl<sub>3</sub>)  
(3j)

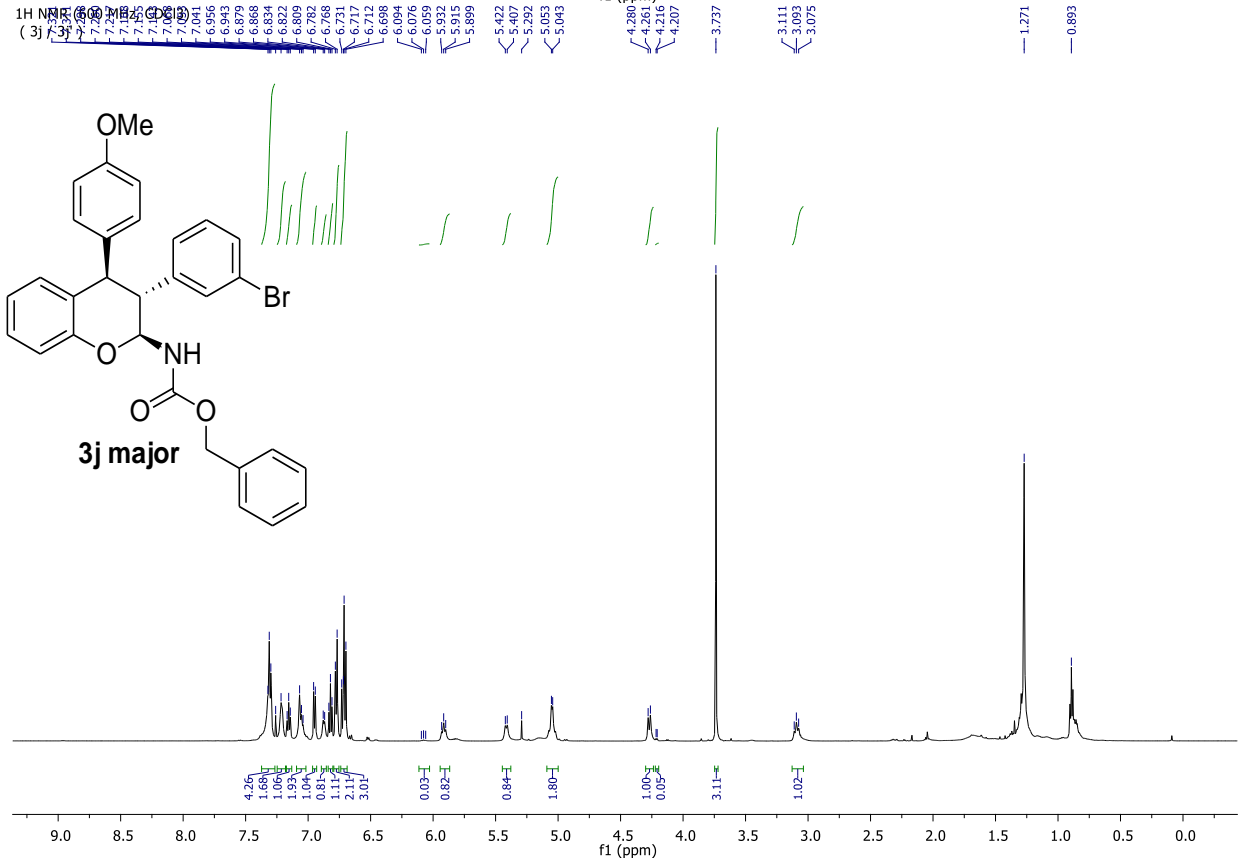

<sup>1</sup>H NMR (600 MHz, CDCl<sub>3</sub>)  
(3j / 3j')

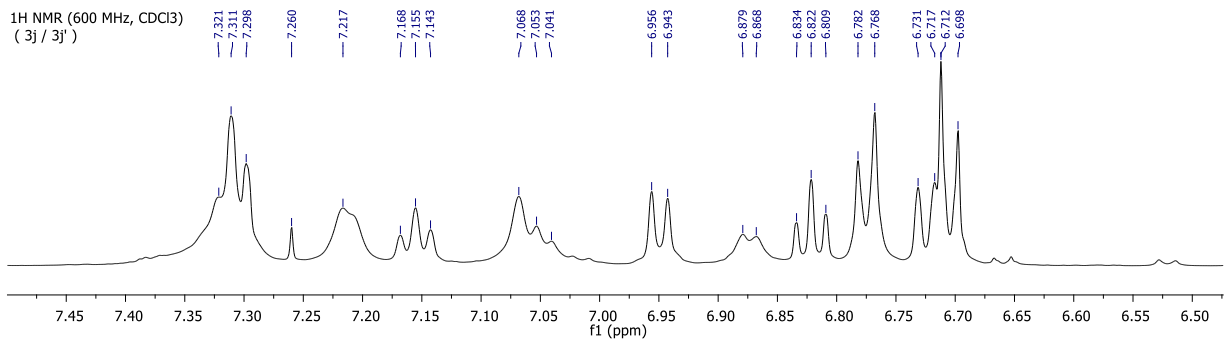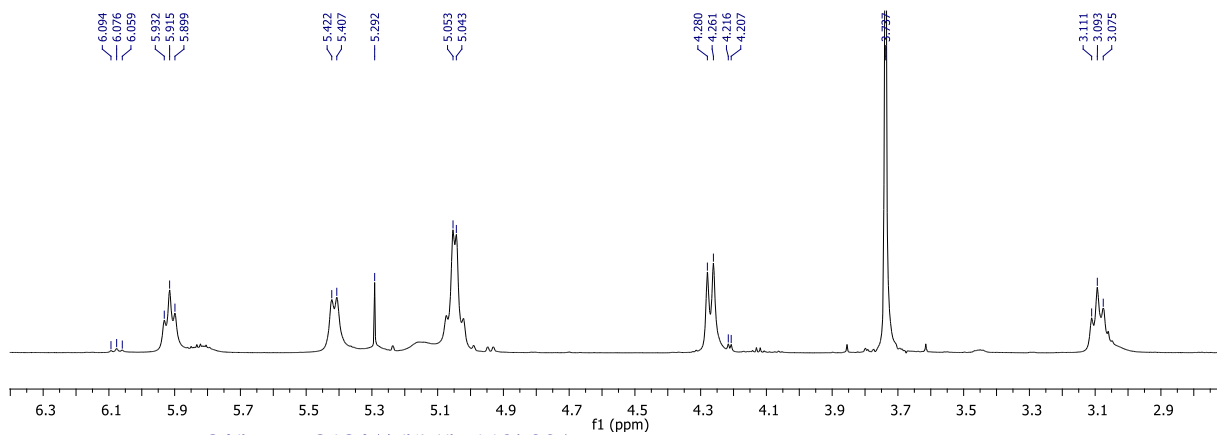

<sup>13</sup>C NMR (150 MHz, CDCl<sub>3</sub>)  
(3j / 3j')

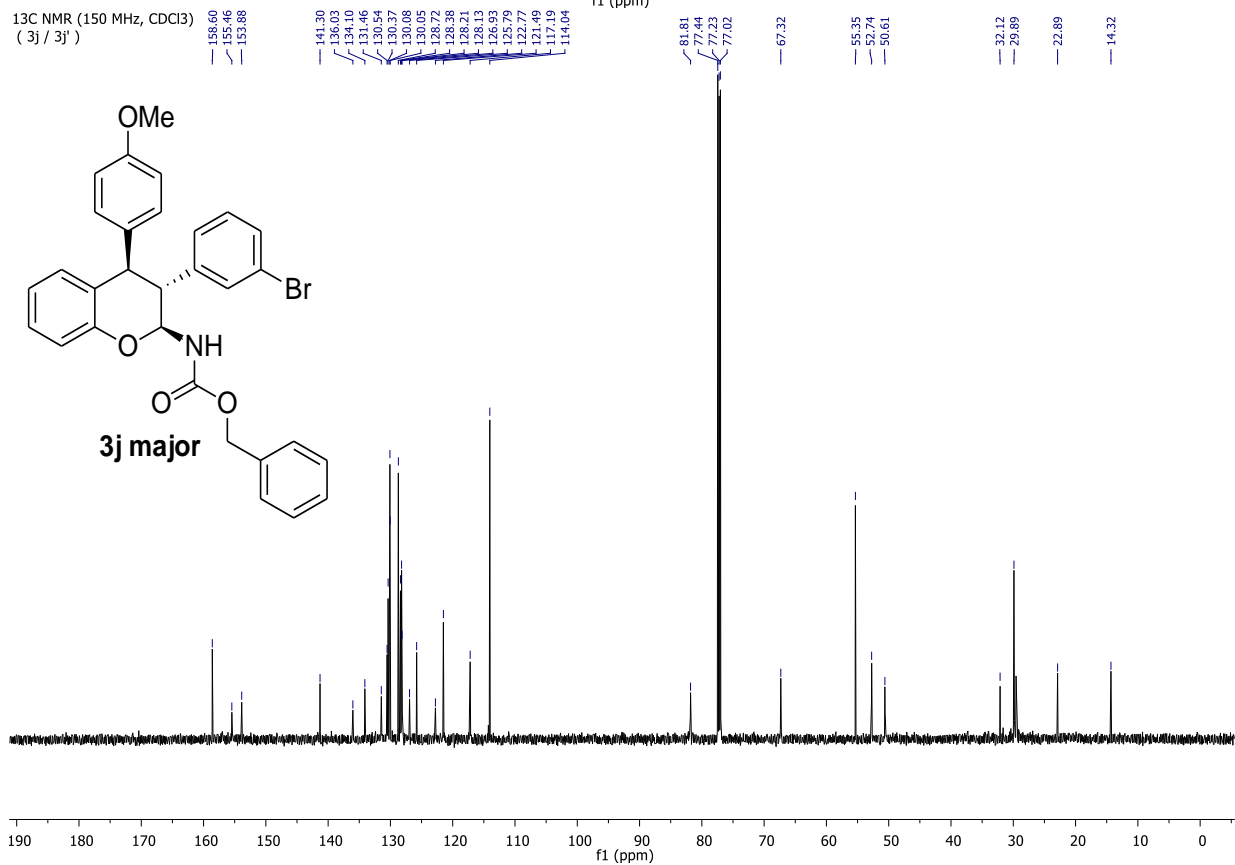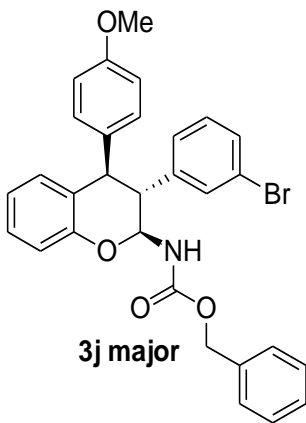

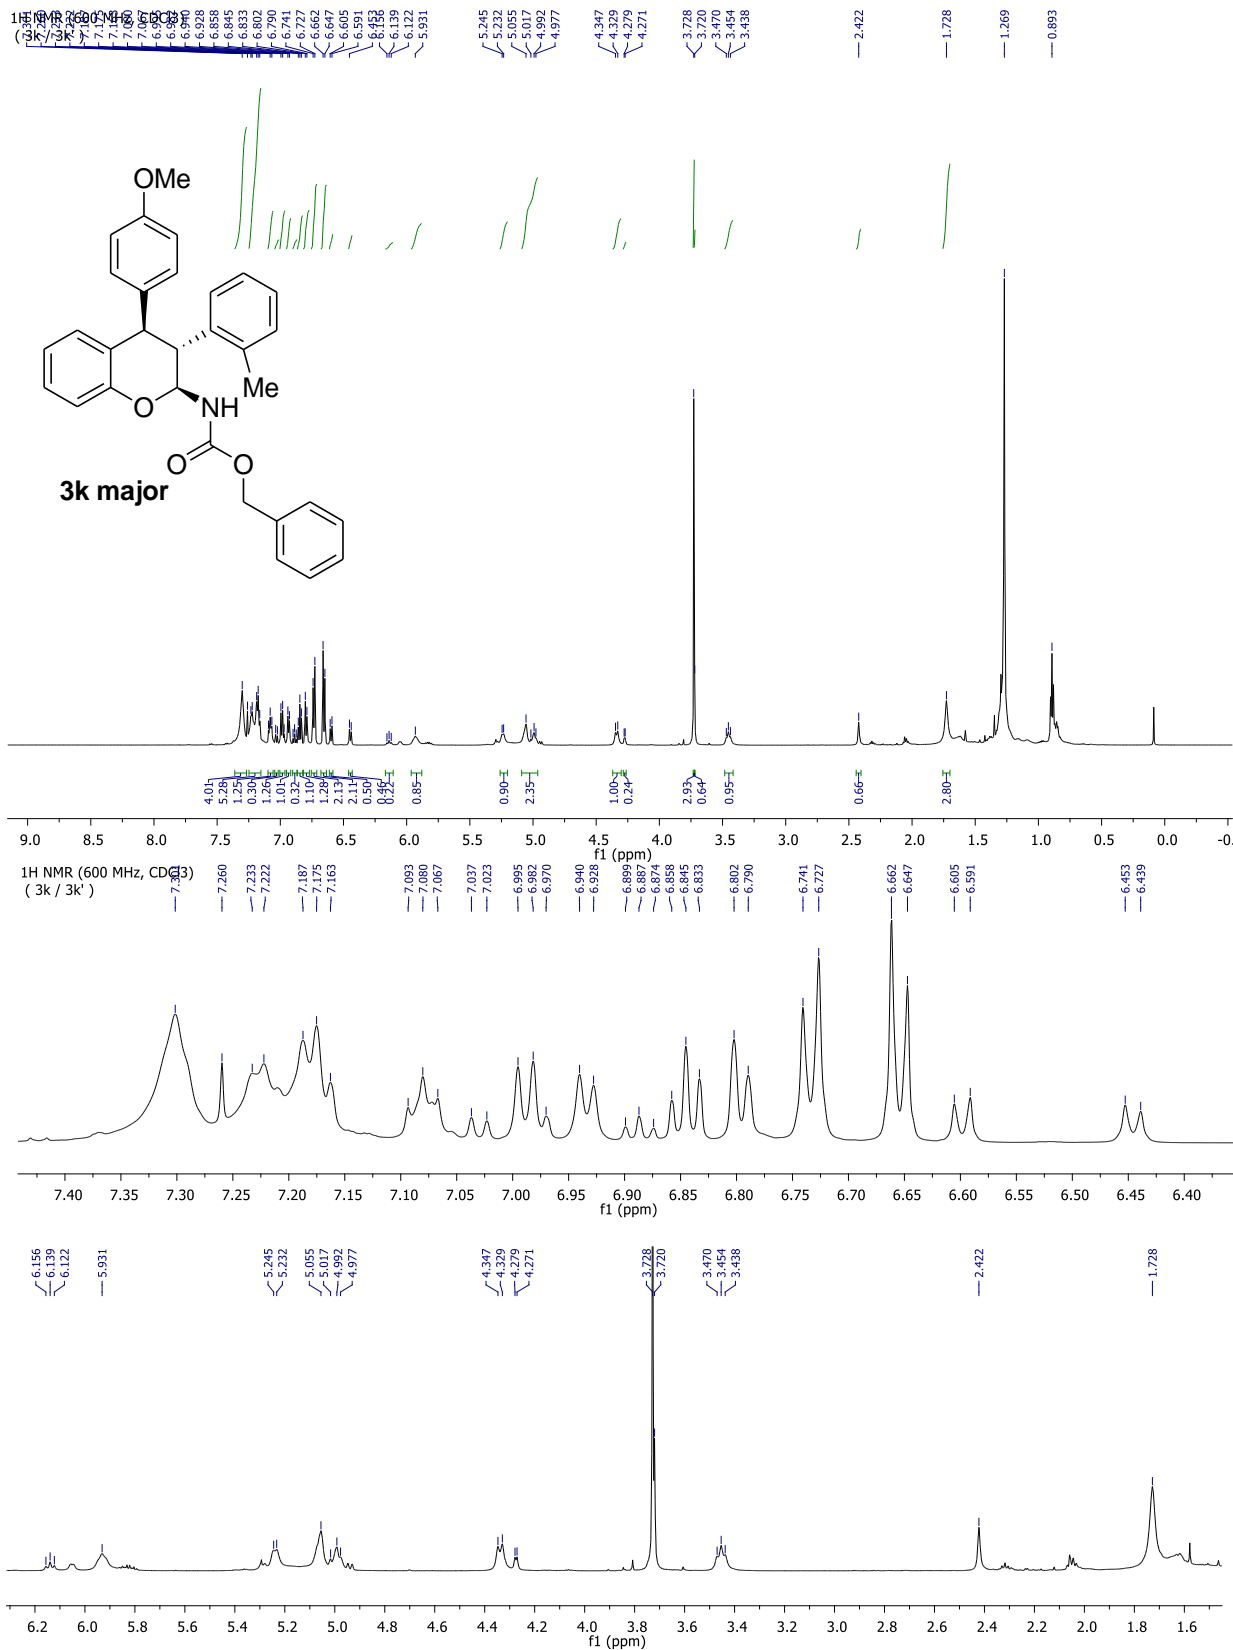

<sup>13</sup>C NMR (100 MHz, CDCl<sub>3</sub>)  
(3k / 3k')

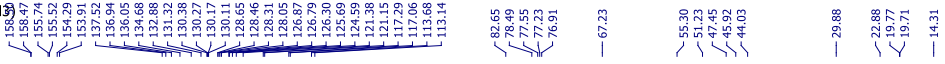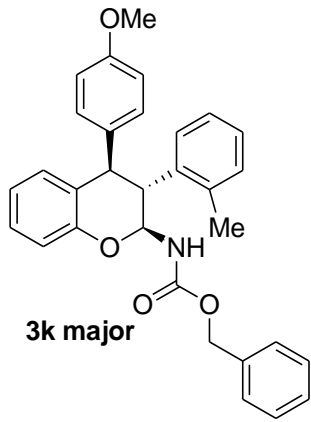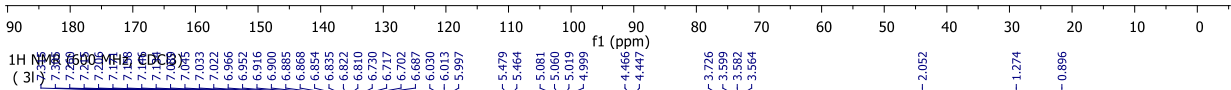

<sup>1</sup>H NMR  
(3l)

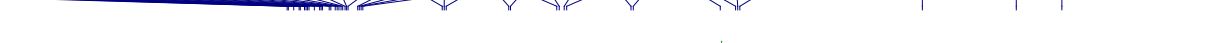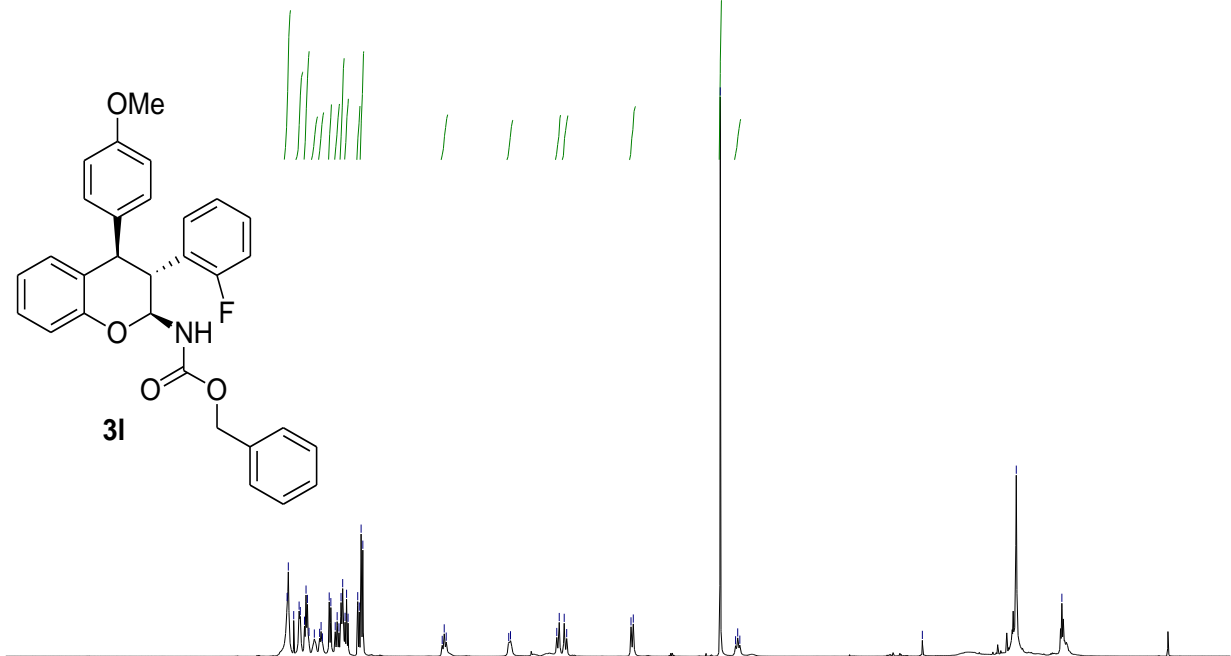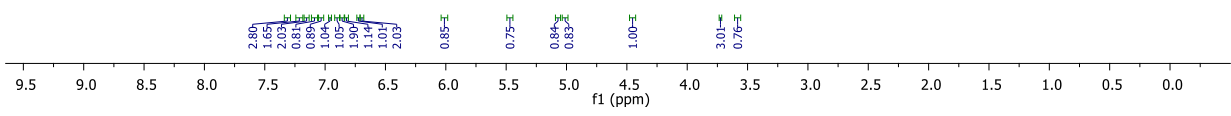

<sup>1</sup>H NMR (600 MHz, CDCl<sub>3</sub>)  
(3)

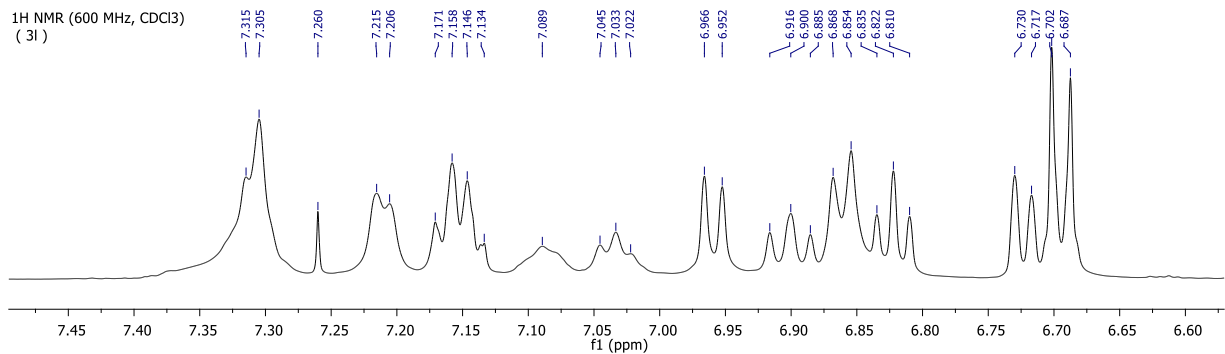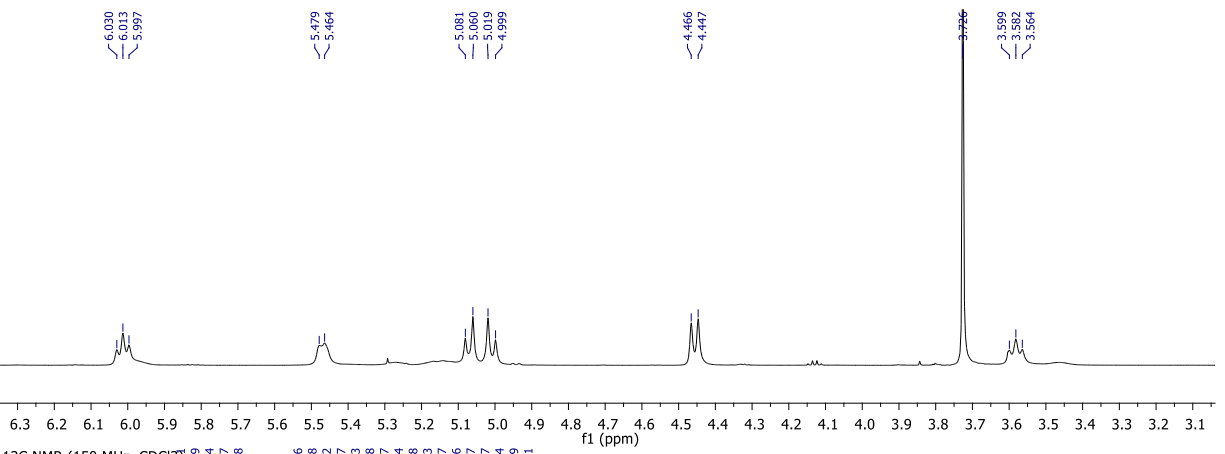

<sup>13</sup>C NMR (150 MHz, CDCl<sub>3</sub>)  
(3)

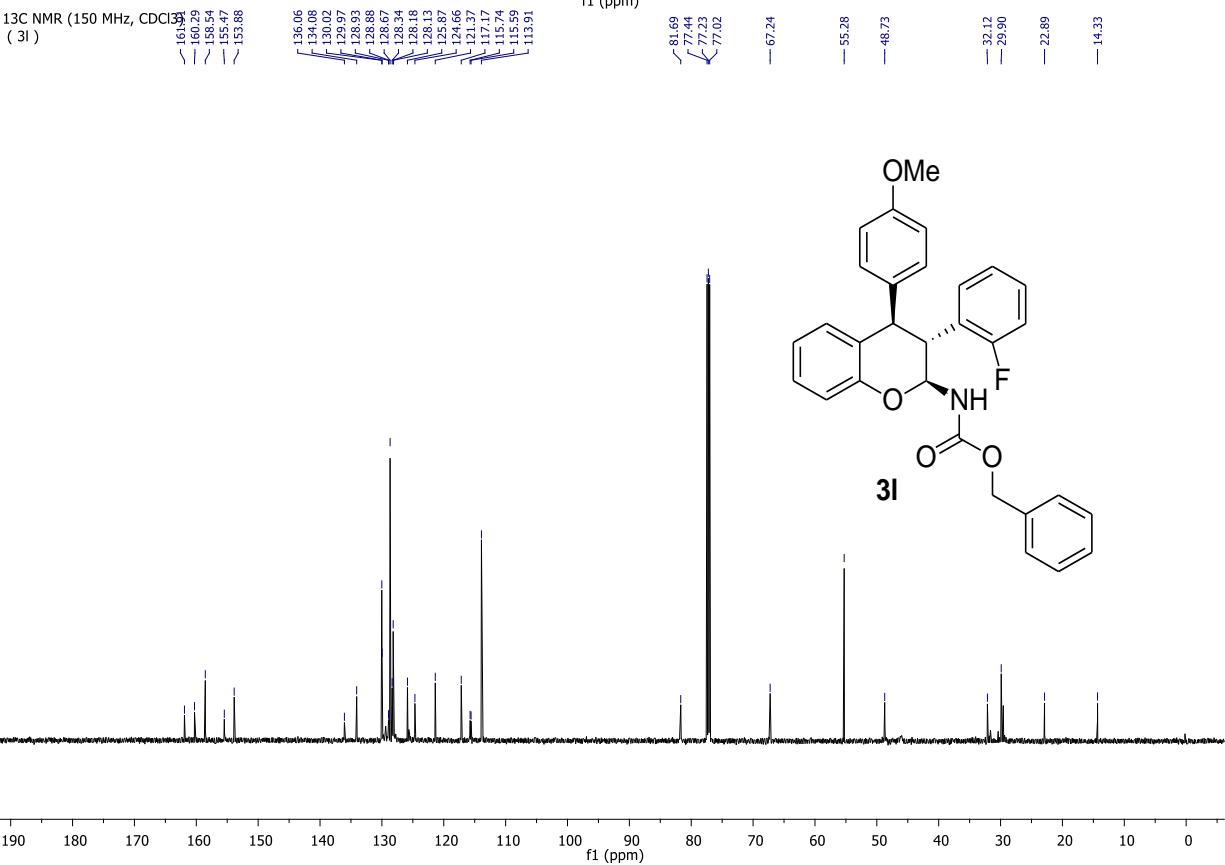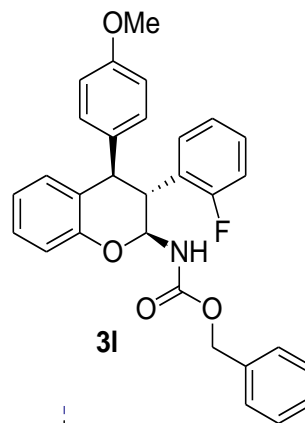



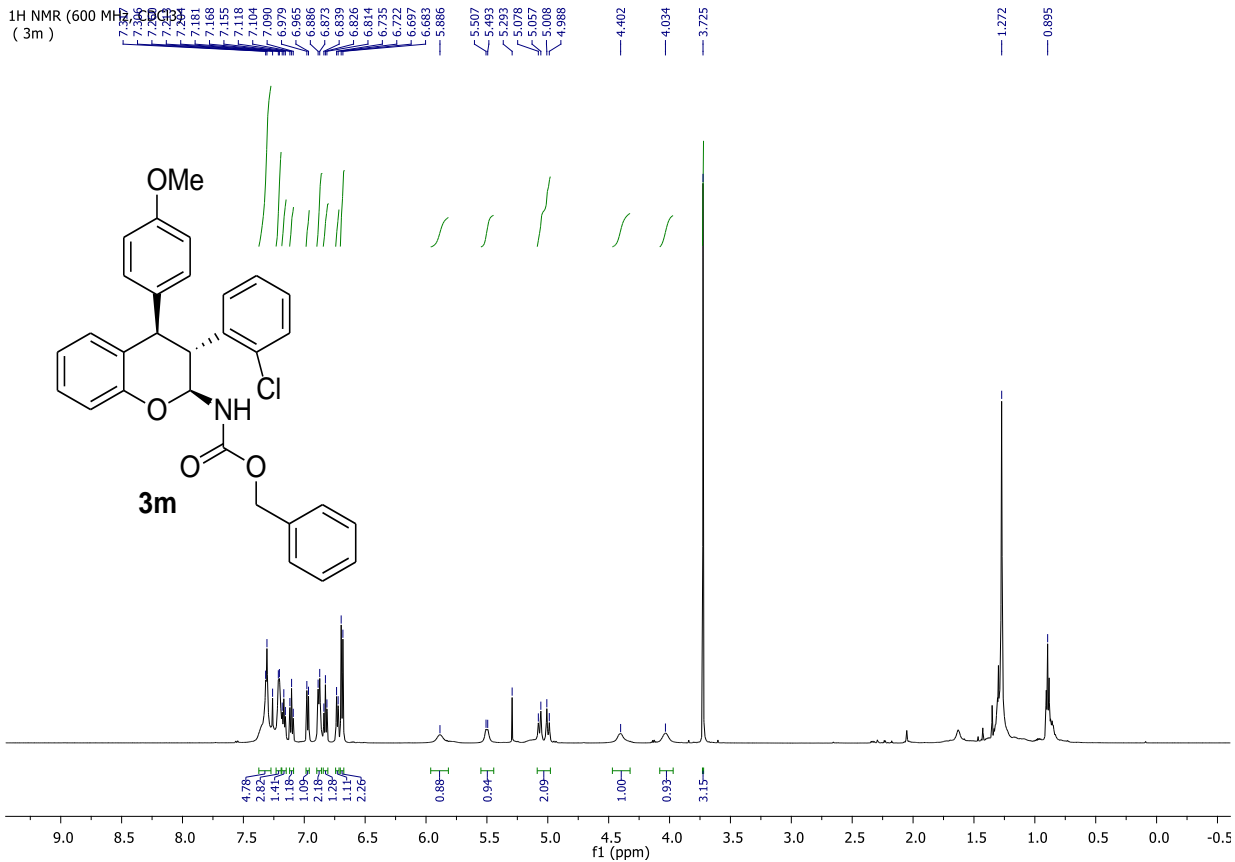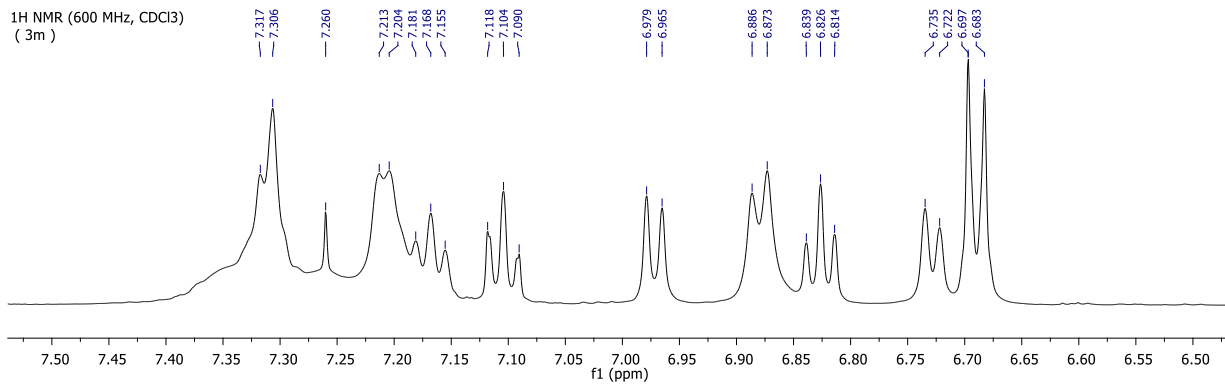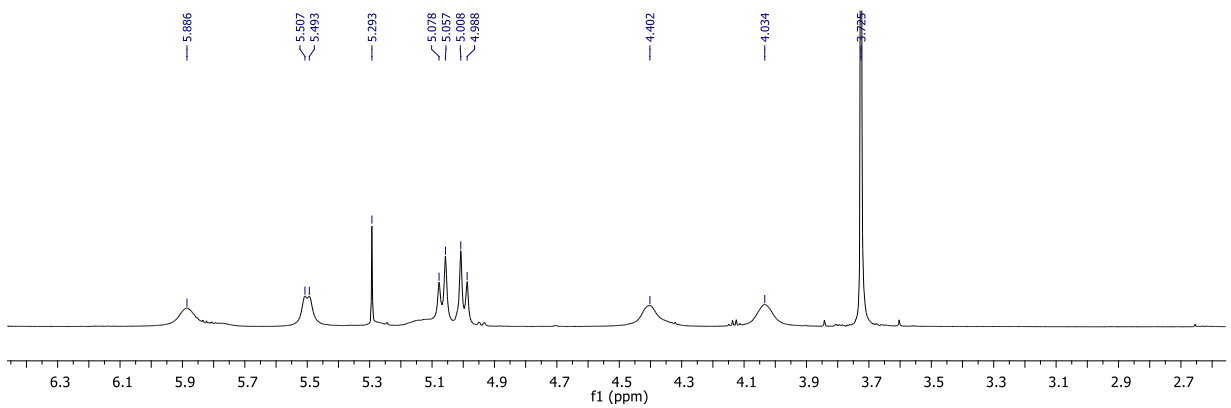

<sup>13</sup>C NMR (150 MHz, CDCl<sub>3</sub>)  
(3m)

158.62  
155.53  
153.77  
136.49  
136.09  
133.35  
130.16  
128.69  
128.68  
128.40  
128.33  
128.22  
128.08  
127.66  
125.95  
121.35  
117.56  
113.88  
82.66  
77.44  
77.02  
67.22  
55.28  
49.46  
46.59  
32.13  
29.90  
22.89  
22.85  
14.32

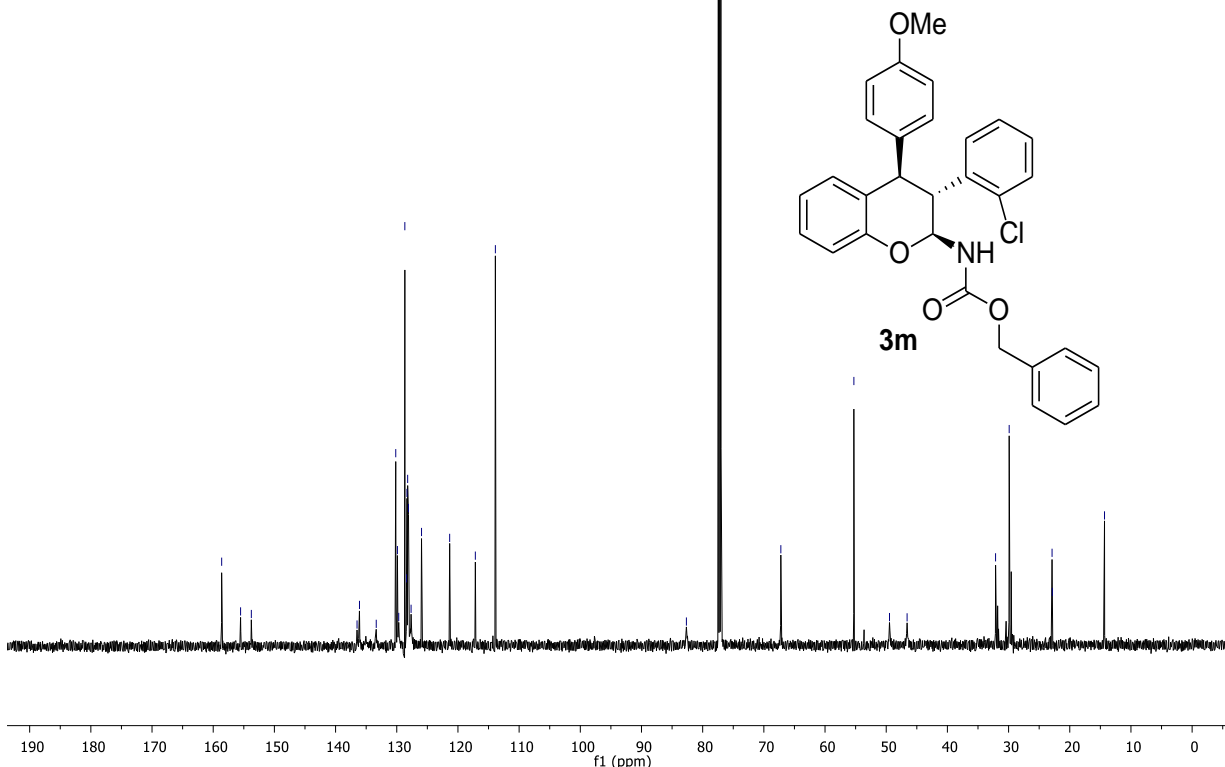

<sup>1</sup>H NMR (3n)

7.863  
7.857  
7.851  
7.845  
7.839  
7.833  
7.170  
7.158  
7.044  
7.038  
7.016  
7.010  
6.998  
6.998  
6.893  
6.880  
6.880  
6.841  
6.828  
6.816  
6.736  
6.720  
6.700  
6.686  
5.900  
5.885  
5.869  
5.549  
5.533  
5.078  
5.057  
5.005  
4.985  
4.400  
4.392  
4.058  
4.041  
4.024  
3.726  
2.052  
1.273  
0.895

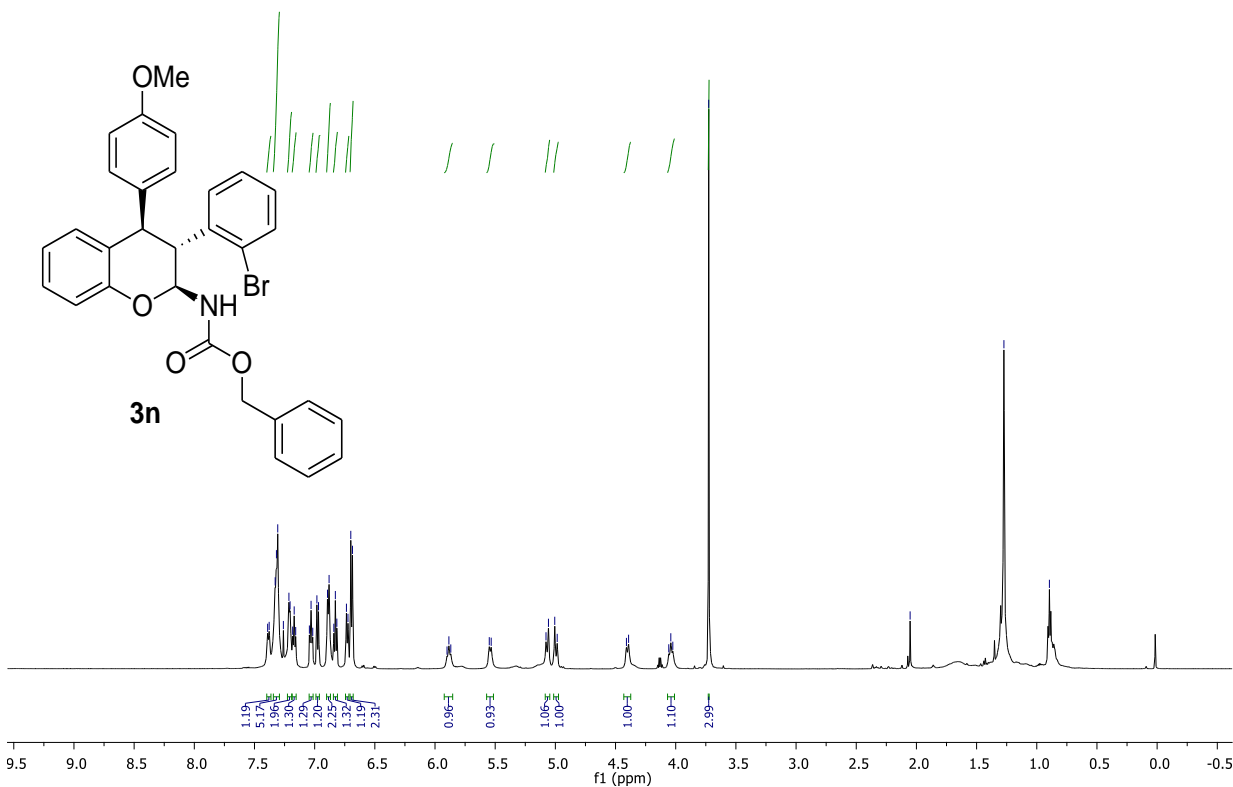

<sup>1</sup>H NMR (600 MHz, CDCl<sub>3</sub>)  
(3n)

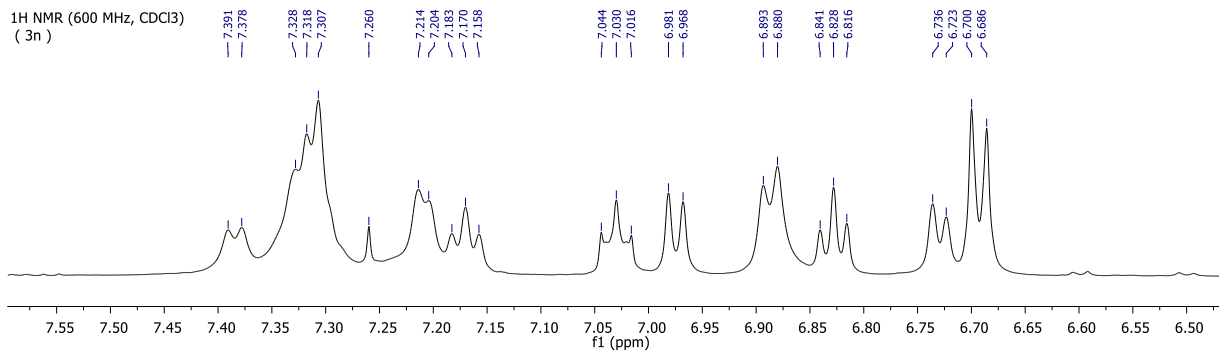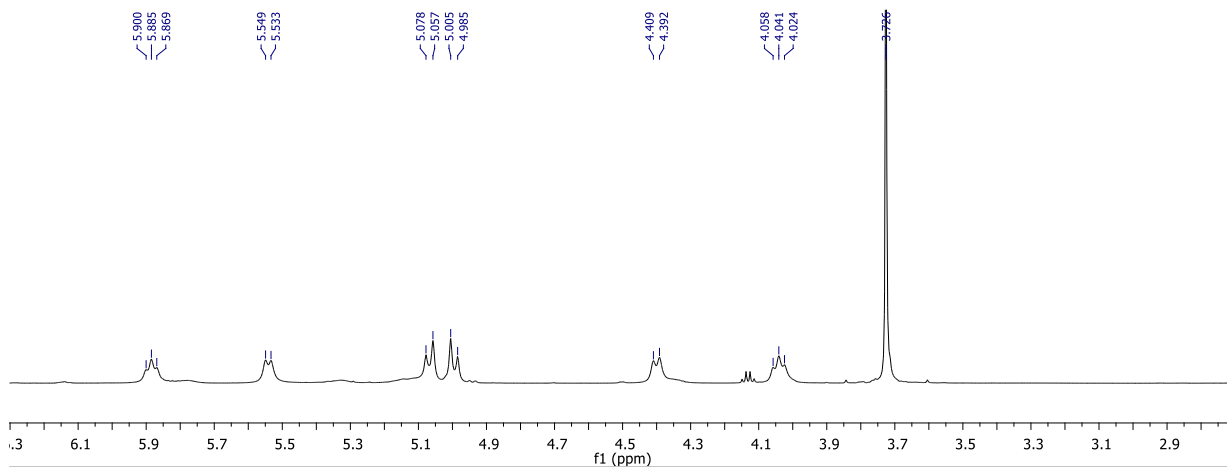

<sup>13</sup>C NMR (150 MHz, CDCl<sub>3</sub>)  
(3n)

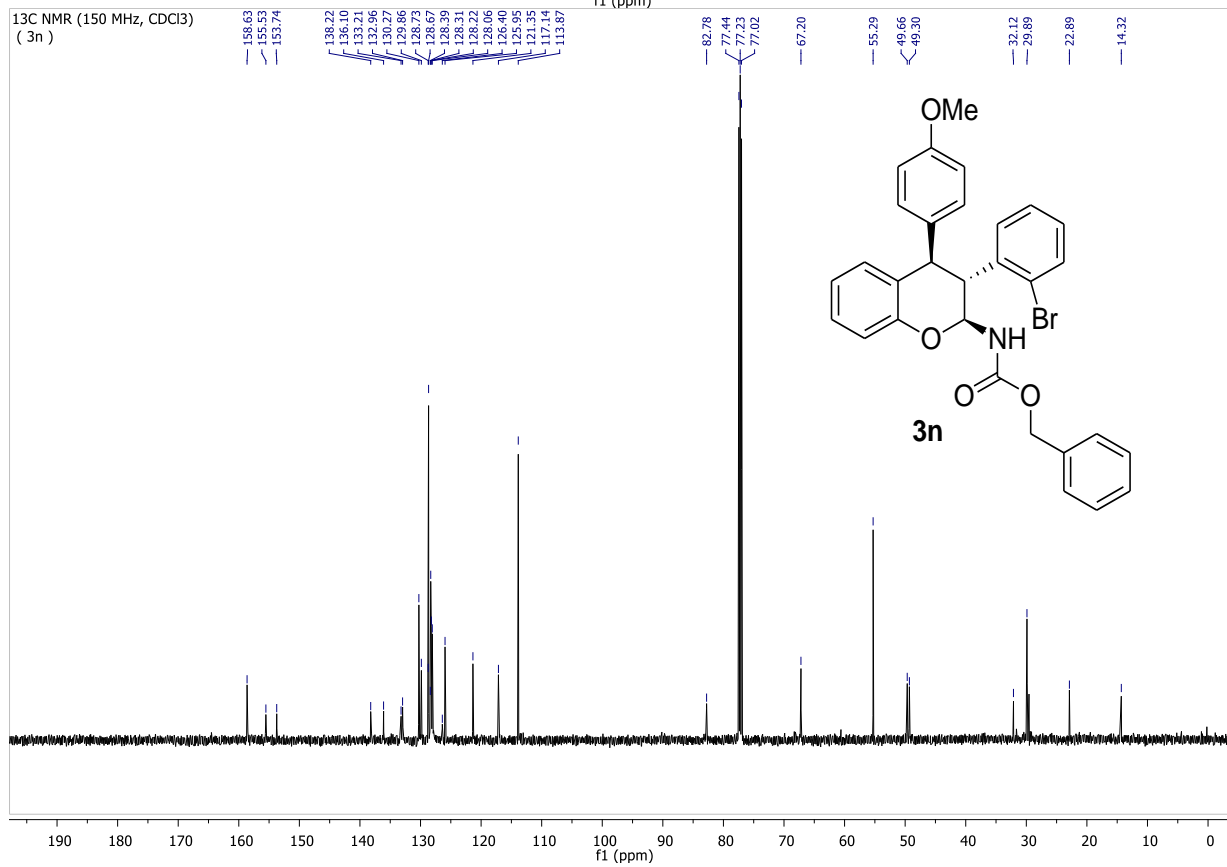

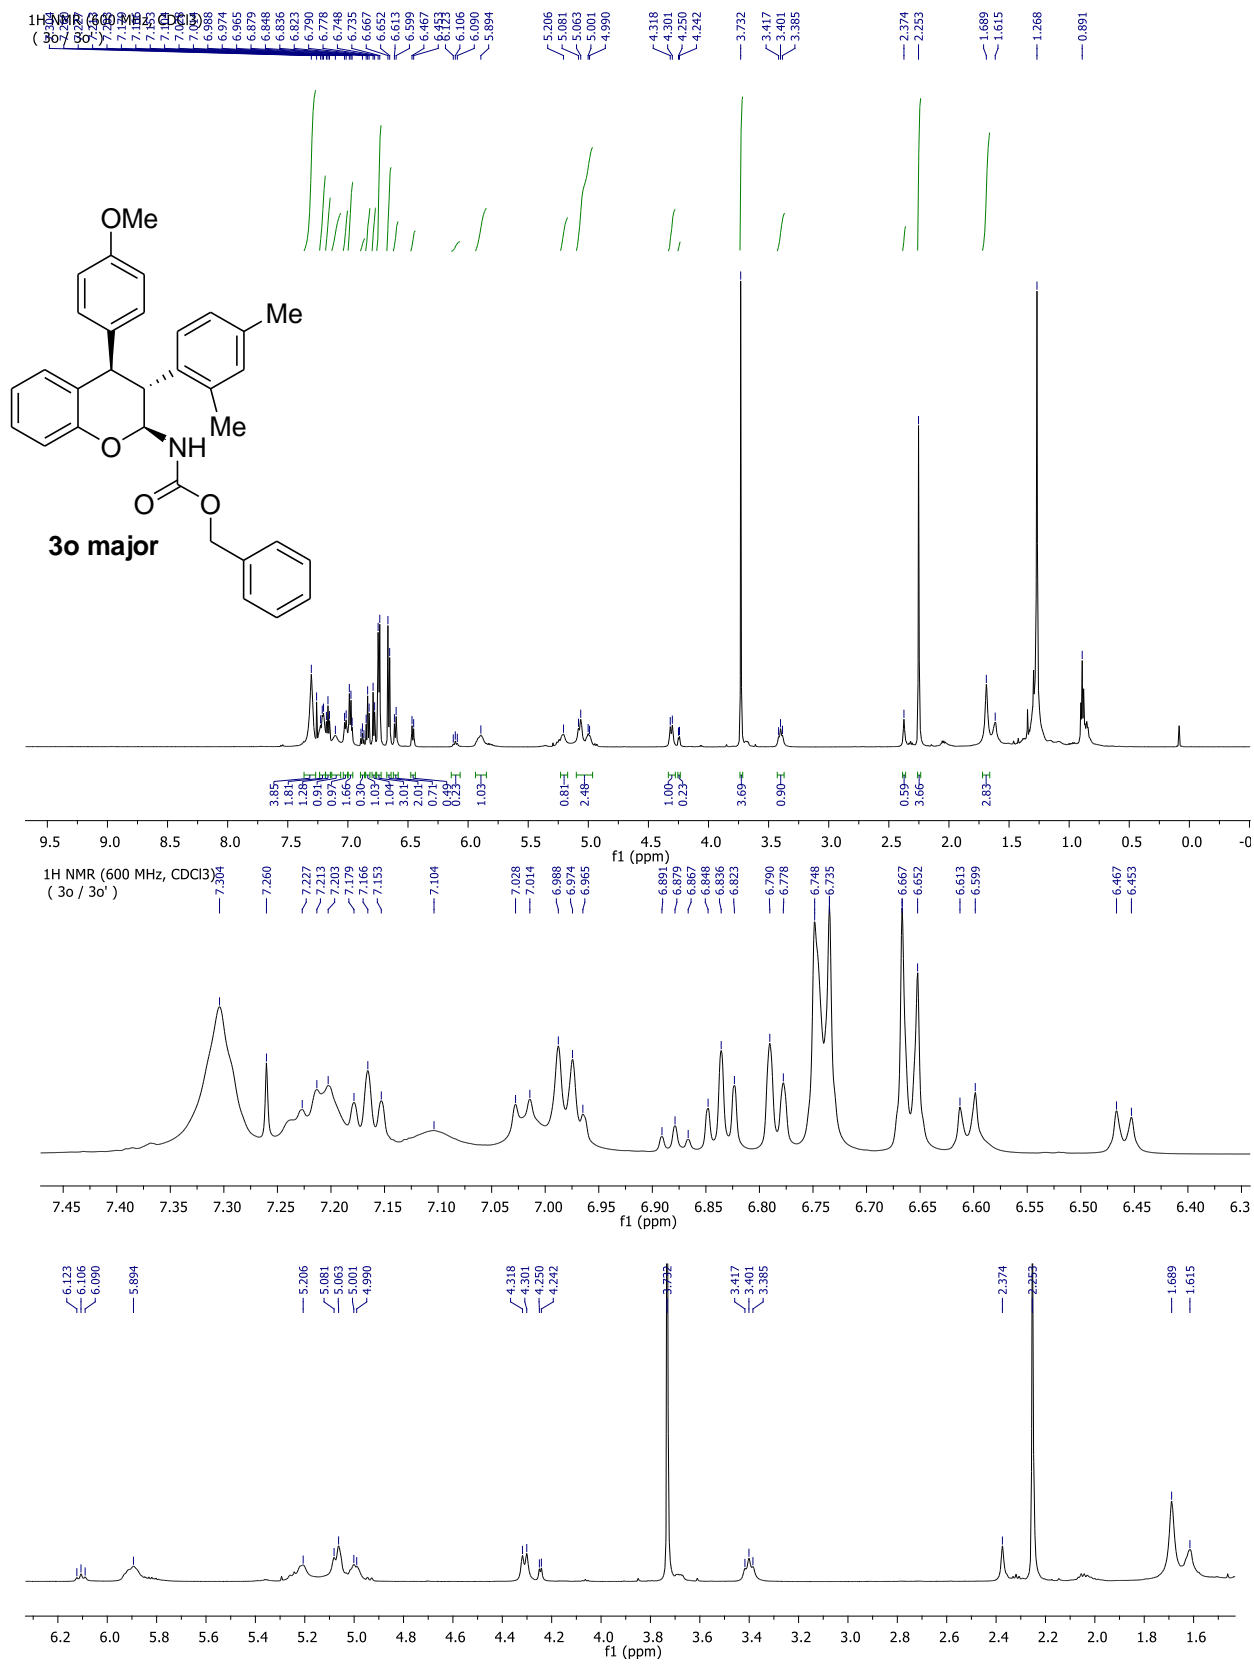

13C NMR (150 MHz, CDCl<sub>3</sub>)  
(3o / 3o')

158.38  
158.45  
158.54  
154.30  
153.95  
136.63  
136.23  
134.90  
134.36  
132.98  
131.40  
131.11  
130.11  
128.65  
128.43  
128.31  
128.02  
127.68  
126.43  
124.74  
121.35  
121.10  
117.60  
113.70  
113.15

83.73  
78.62  
77.44  
77.02  
75.59  
67.22  
60.59  
55.32  
51.19  
46.01  
43.77  
31.78  
29.89  
22.85  
21.18  
21.13  
19.70  
19.64  
14.31

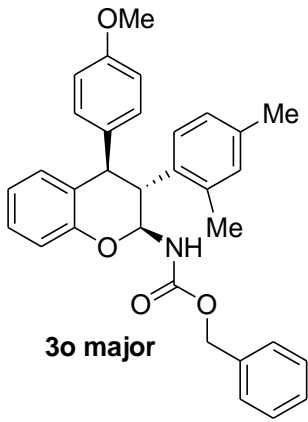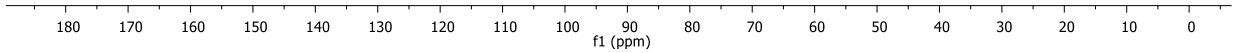

1H NMR (600 MHz, CDCl<sub>3</sub>)  
(3p / 3p')

7.28  
7.25  
7.24  
7.26  
7.18  
7.15  
7.17  
7.157  
6.914  
6.91  
6.957  
6.933  
6.923  
6.839  
6.827  
6.814  
6.784  
6.770  
6.774  
6.674  
6.663  
6.679  
6.134  
5.891  
5.877  
5.294  
4.322  
4.304  
4.244  
4.235  
4.098  
3.729  
3.135  
3.117  
3.100  
2.049  
1.267  
0.890

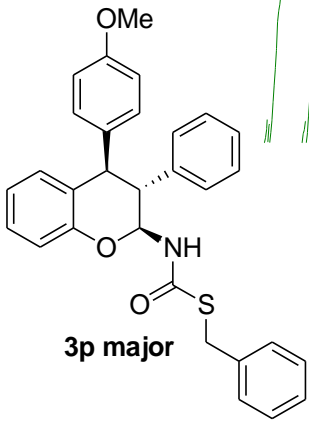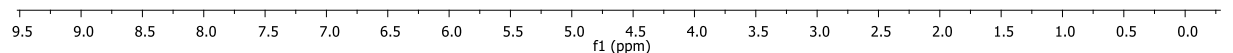

<sup>1</sup>H NMR (600 MHz, CDCl<sub>3</sub>)  
(3p / 3p')

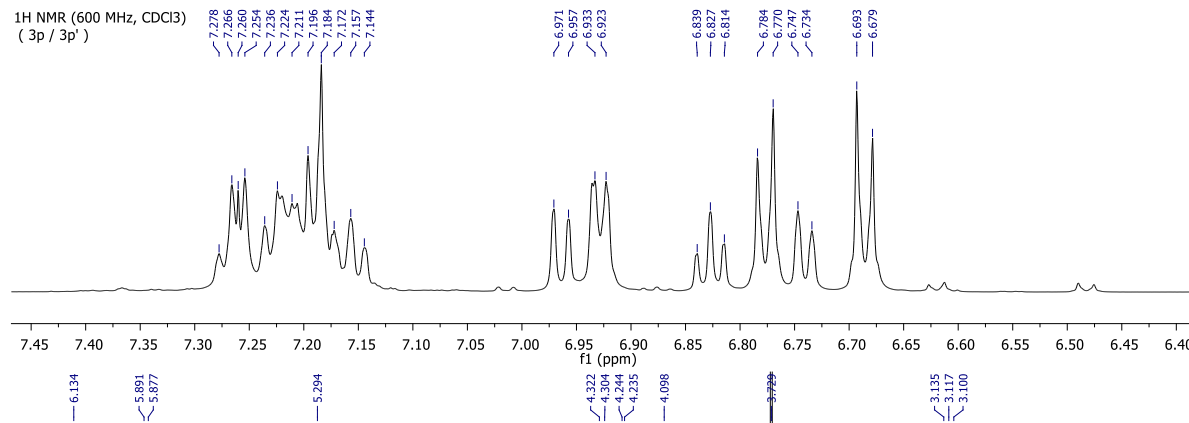

<sup>13</sup>C NMR (100 MHz, CDCl<sub>3</sub>)  
(3p / 3p')

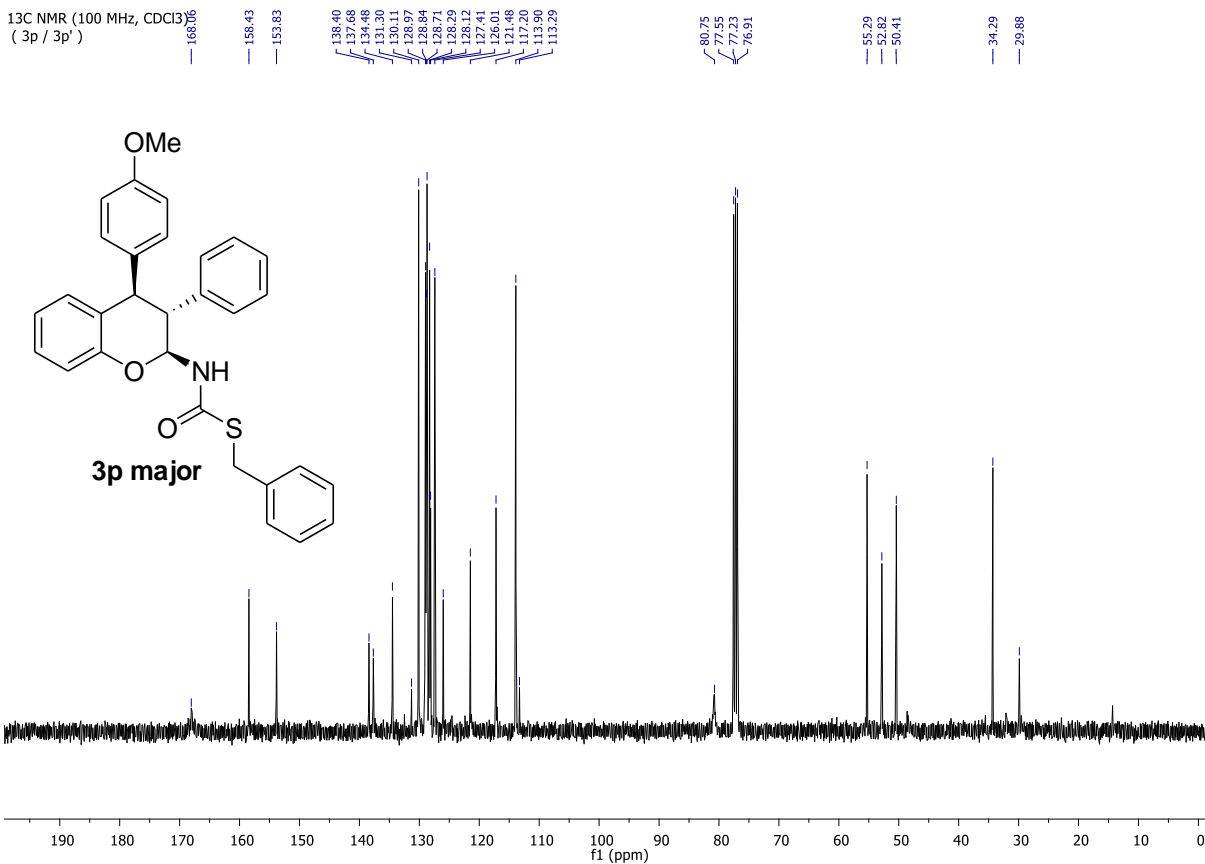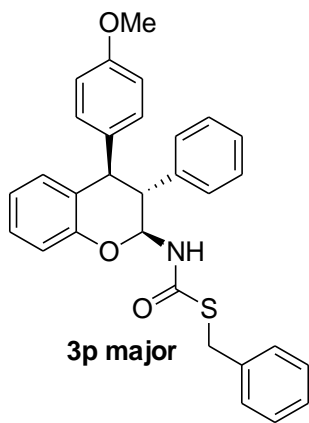

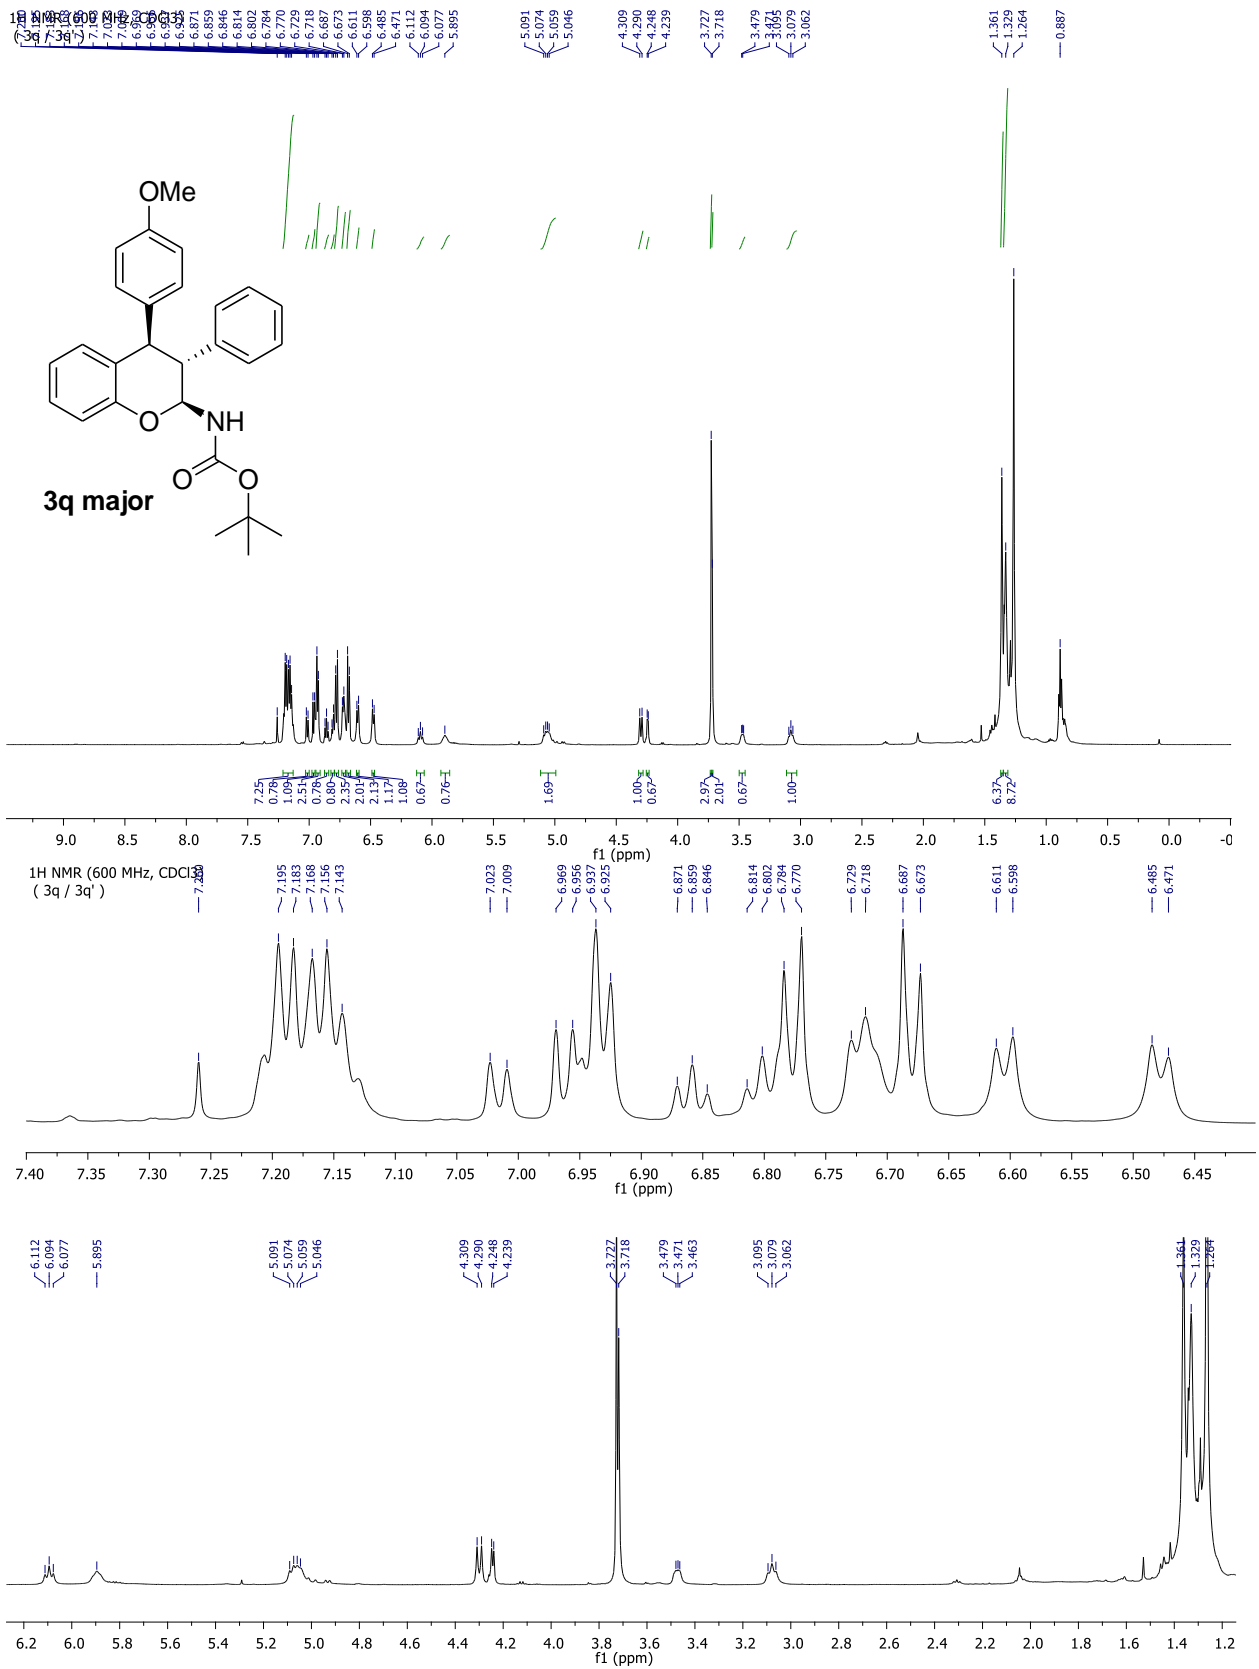

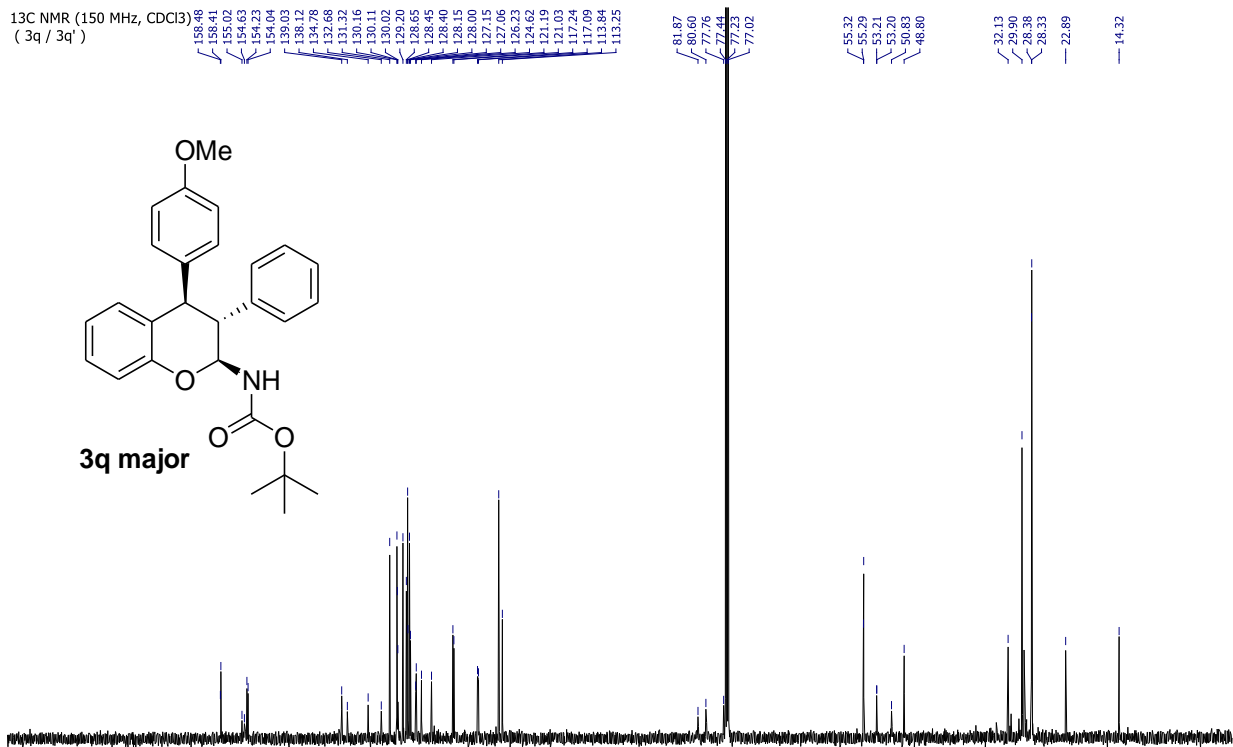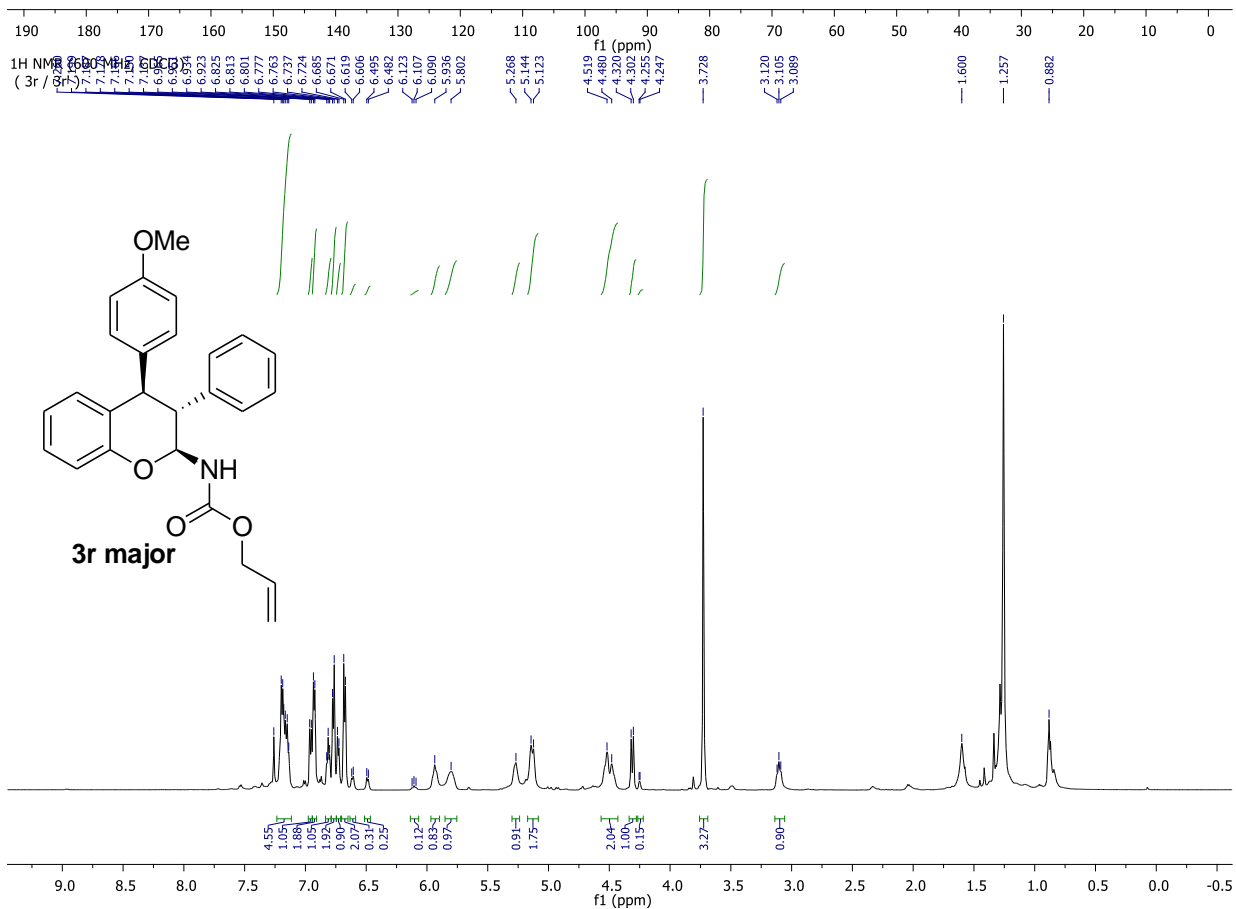



1H NMR (600 MHz, CDCl<sub>3</sub>)  
(3r / 3r')

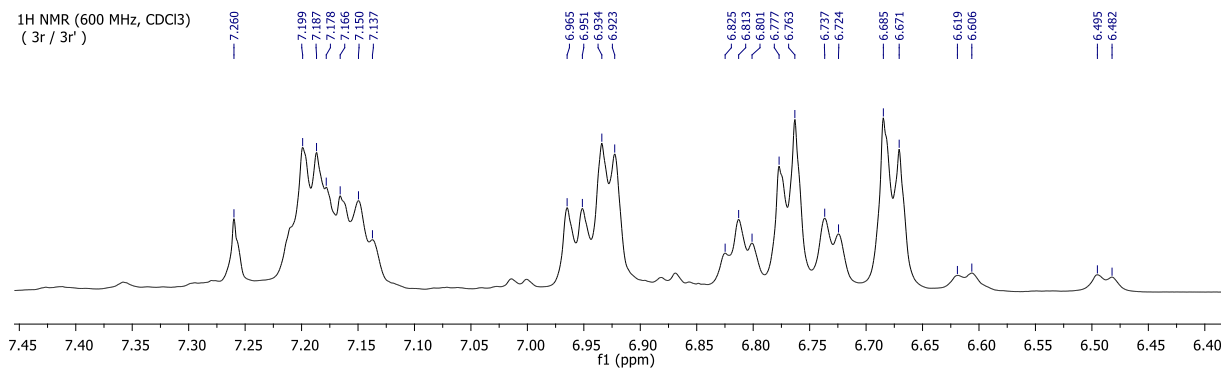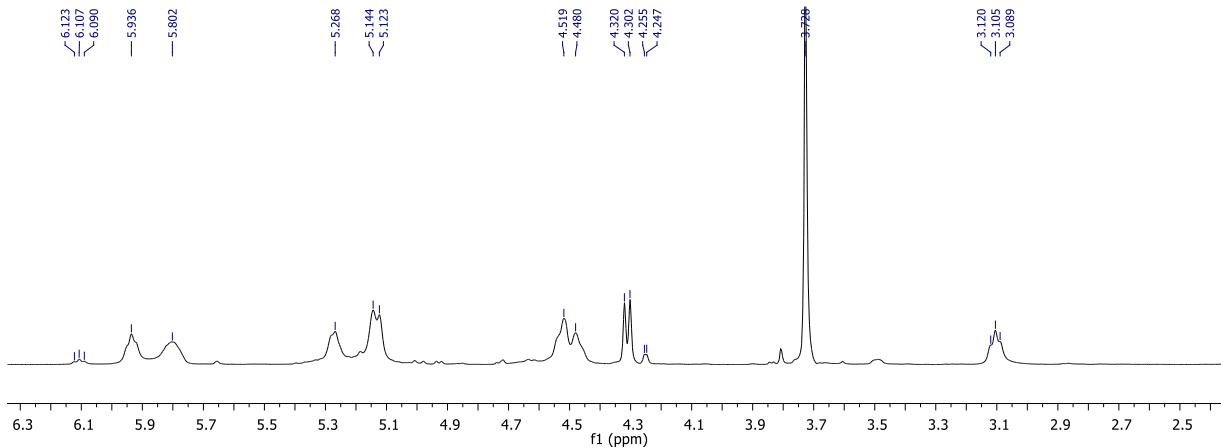

13C NMR (150 MHz, CDCl<sub>3</sub>)  
(3r / 3r')

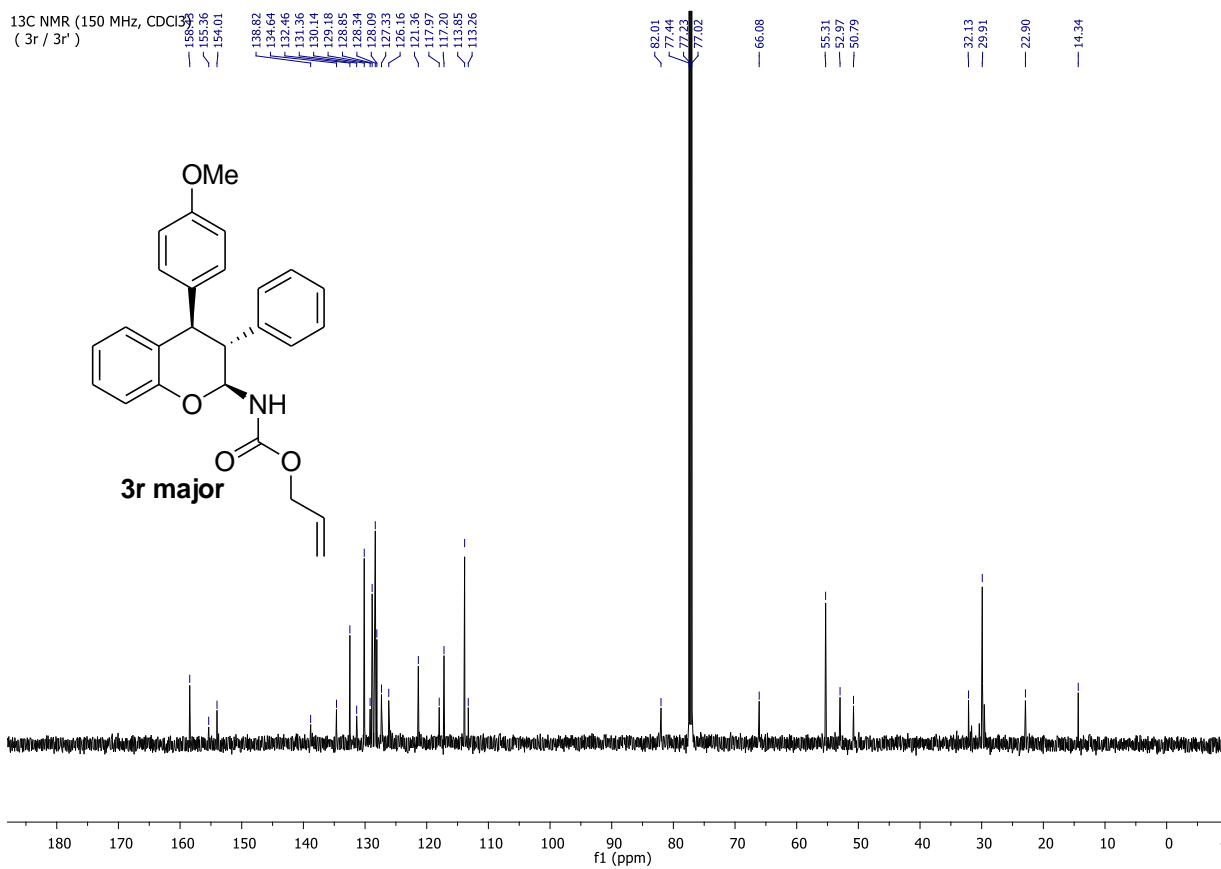

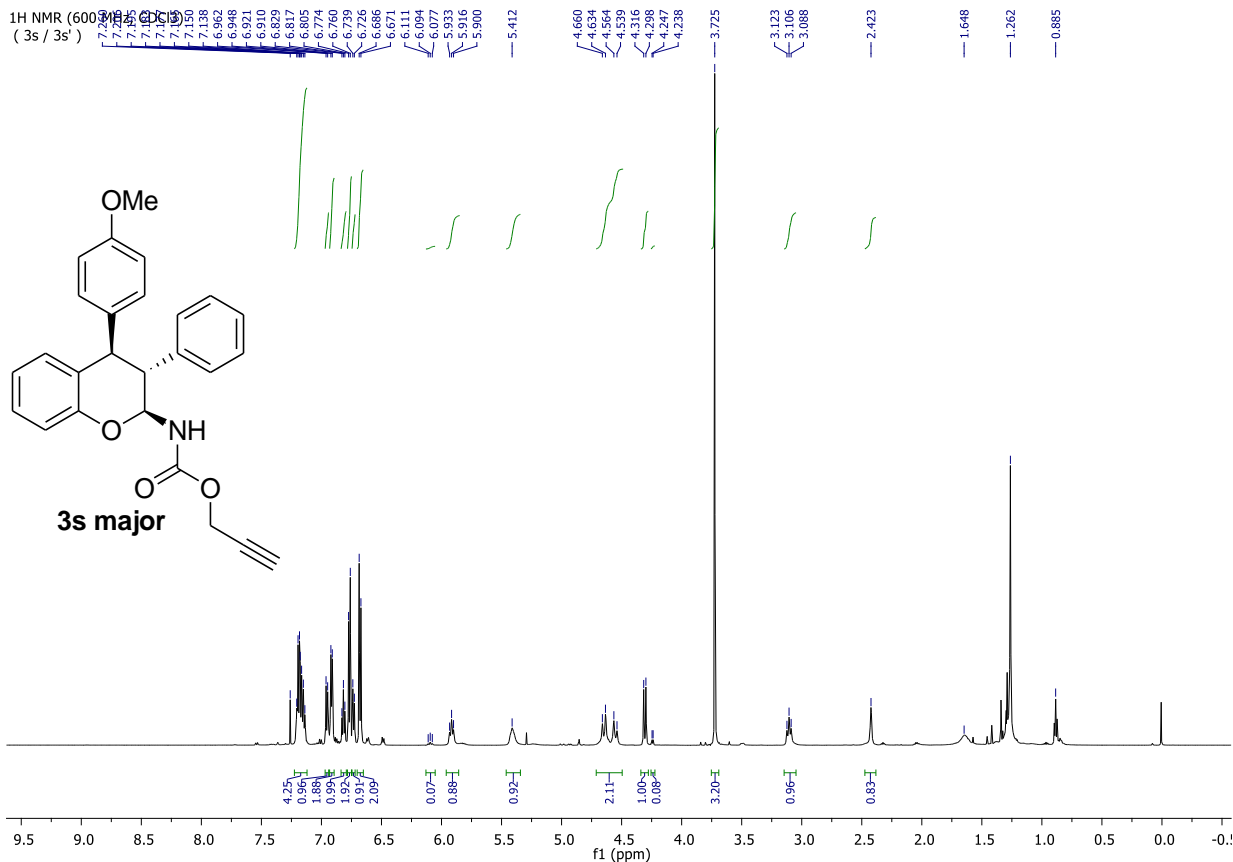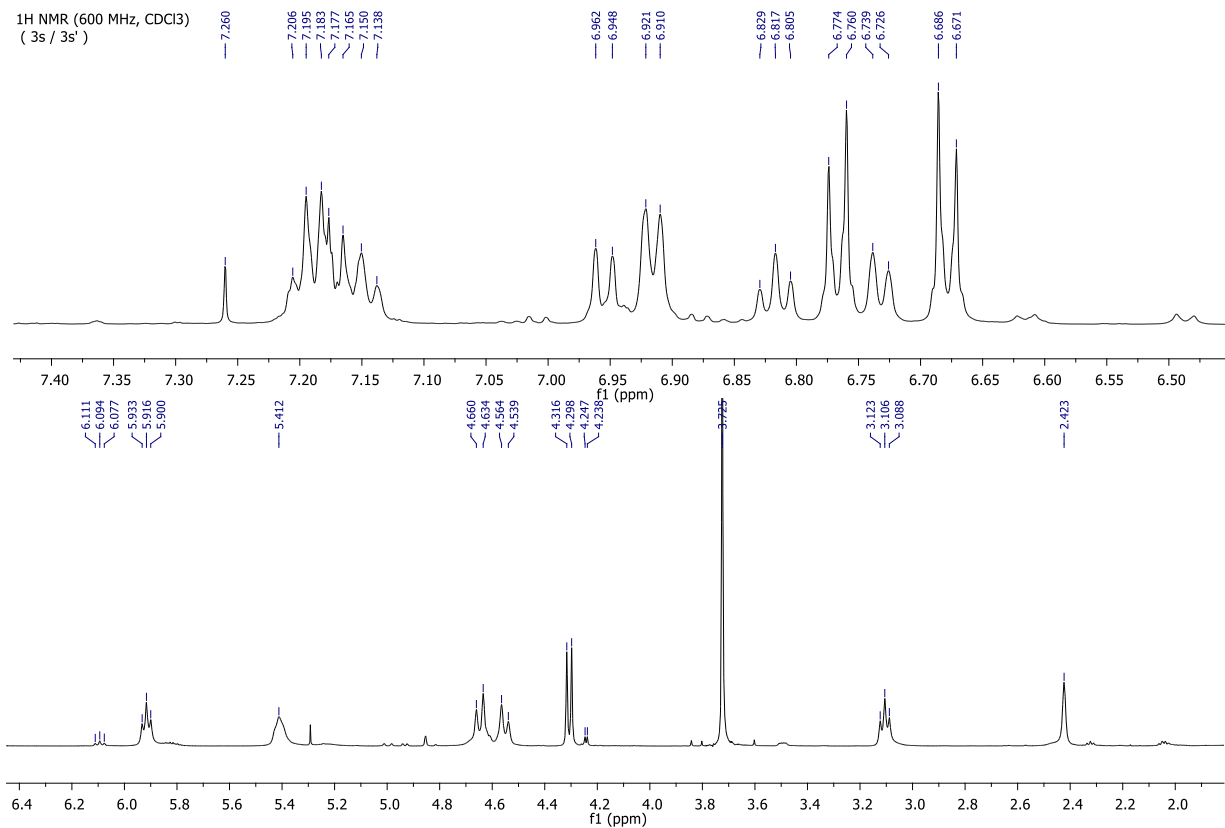

<sup>13</sup>C NMR (150 MHz, CDCl<sub>3</sub>)  
(3s / 3s')

158.45  
154.69  
153.91  
138.67  
134.56  
131.35  
130.13  
128.87  
128.32  
127.39  
126.12  
121.42  
117.19  
113.87  
113.29

82.02  
77.78  
77.44  
77.02  
75.21

55.30  
53.10  
52.85  
50.70

32.12  
29.89

22.89

14.32

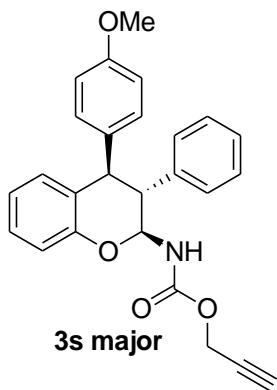

190 180 170 160 150 140 130 120 110 100 90 80 70 60 50 40 30 20 10 0

<sup>1</sup>H NMR (600 MHz, CDCl<sub>3</sub>)  
(3t / 3t')

7.704  
7.704  
7.249  
7.234  
7.178  
7.081  
6.898  
6.843  
6.550  
6.530  
6.743  
6.695  
6.681  
6.640  
6.626  
6.483  
6.469  
6.122  
6.106  
6.081  
5.941  
5.927  
5.912  
5.337  
5.043  
5.010

4.260  
4.192  
4.188

3.735

3.093  
3.076  
3.060

1.611

1.264

0.887

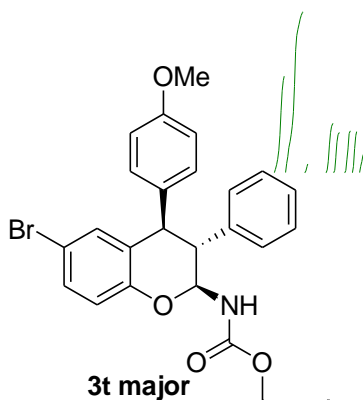

3.5 9.0 8.5 8.0 7.5 7.0 6.5 6.0 5.5 5.0 4.5 4.0 3.5 3.0 2.5 2.0 1.5 1.0 0.5 0.0 -0

4.62  
7.70  
7.70  
0.43  
2.37  
1.95  
2.04  
2.04  
1.89  
0.72

0.34  
0.84

1.11  
2.60

1.06  
0.36

4.13

0.95

<sup>1</sup>H NMR (600 MHz, CDCl<sub>3</sub>)  
(3t / 3t')

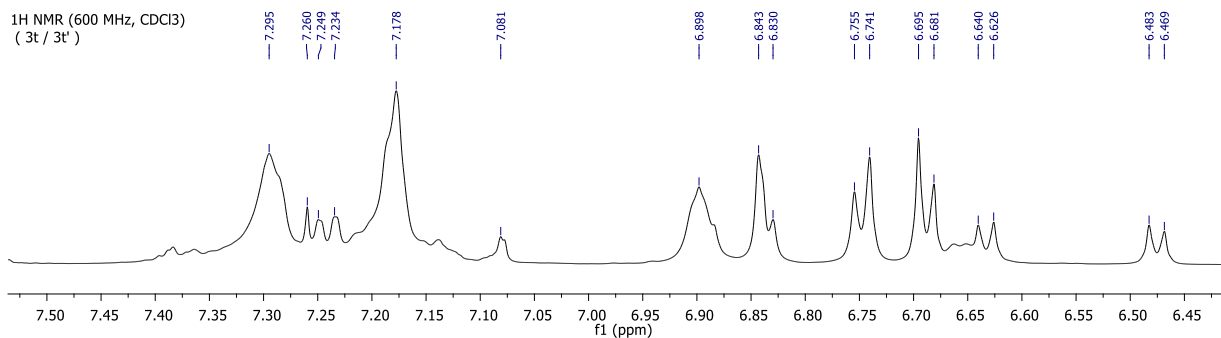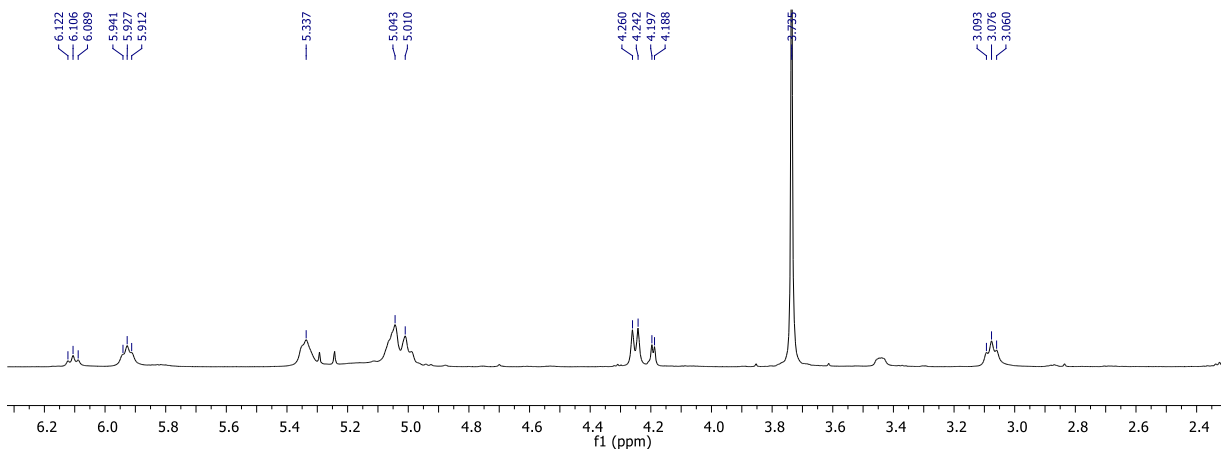

<sup>13</sup>C NMR (150 MHz, CDCl<sub>3</sub>)  
(3t / 3t')

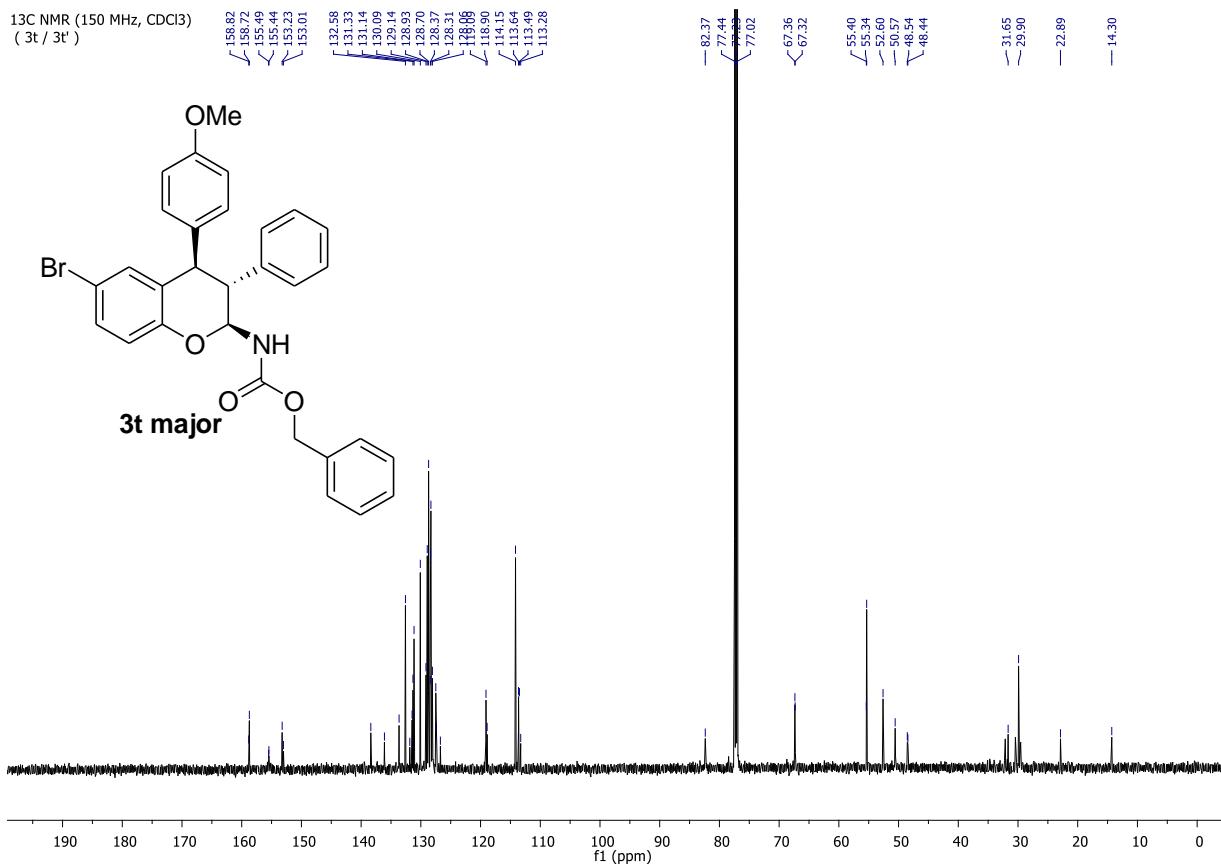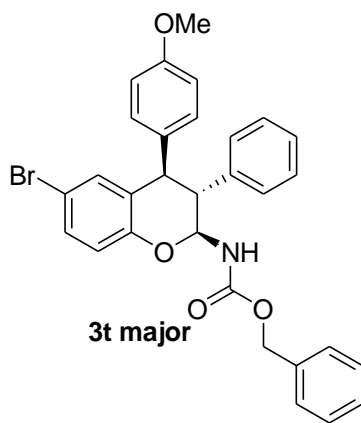

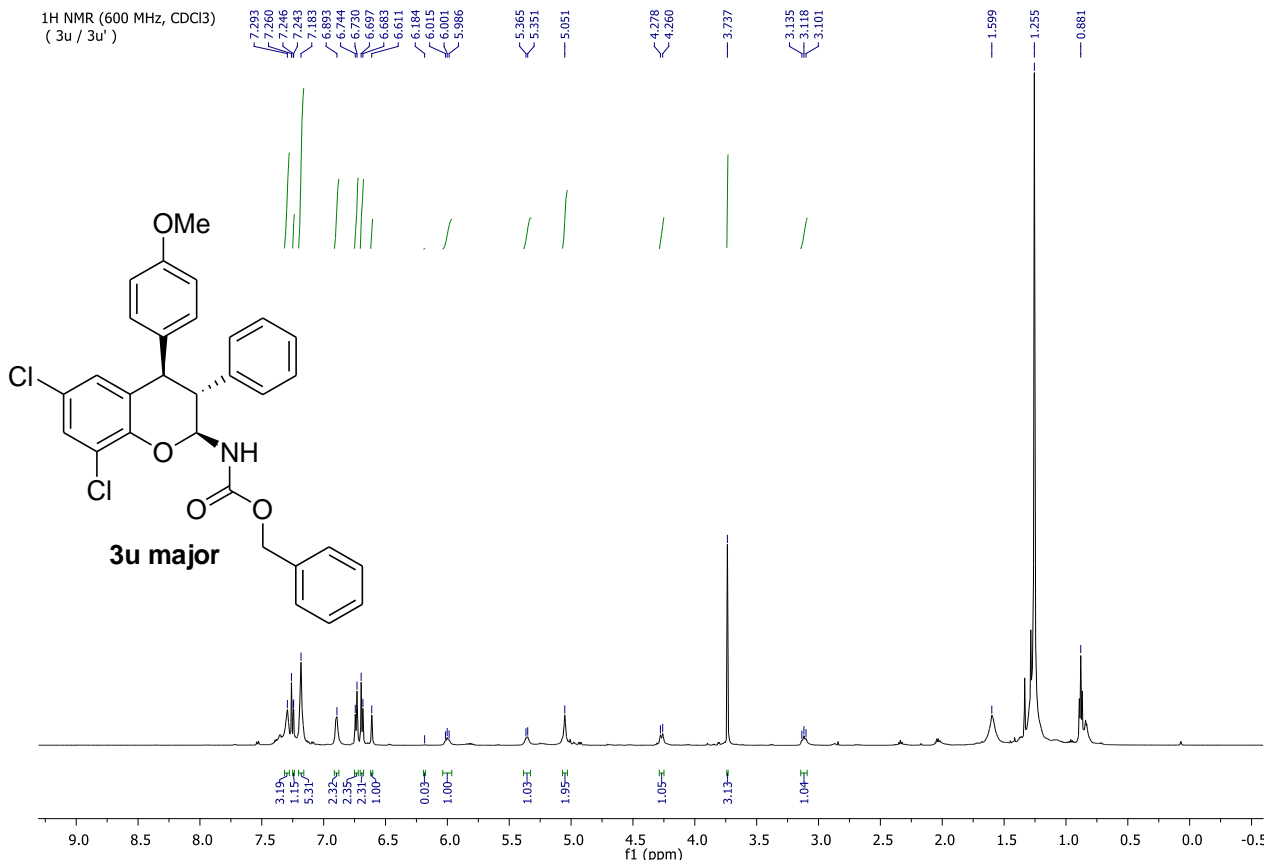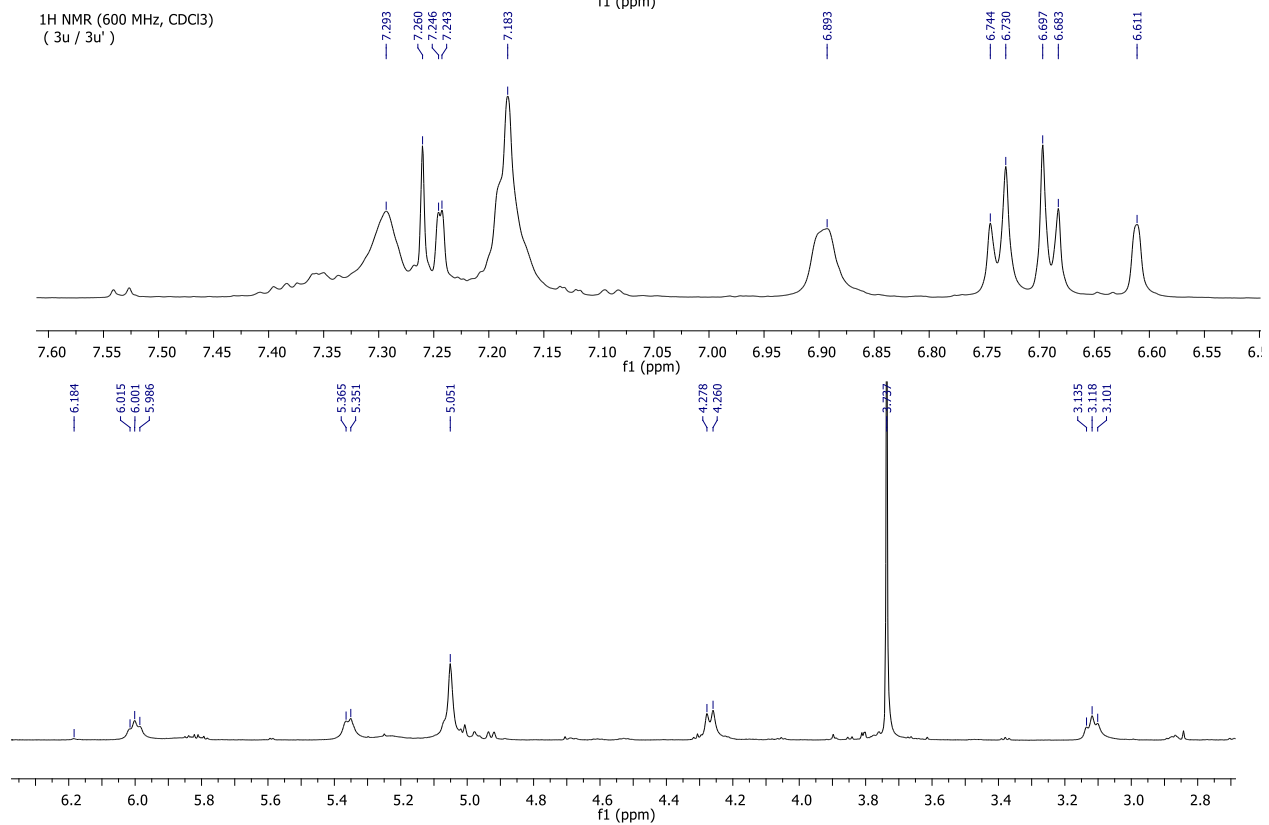

<sup>13</sup>C NMR (150 MHz, CDCl<sub>3</sub>)  
(3u / 3u')

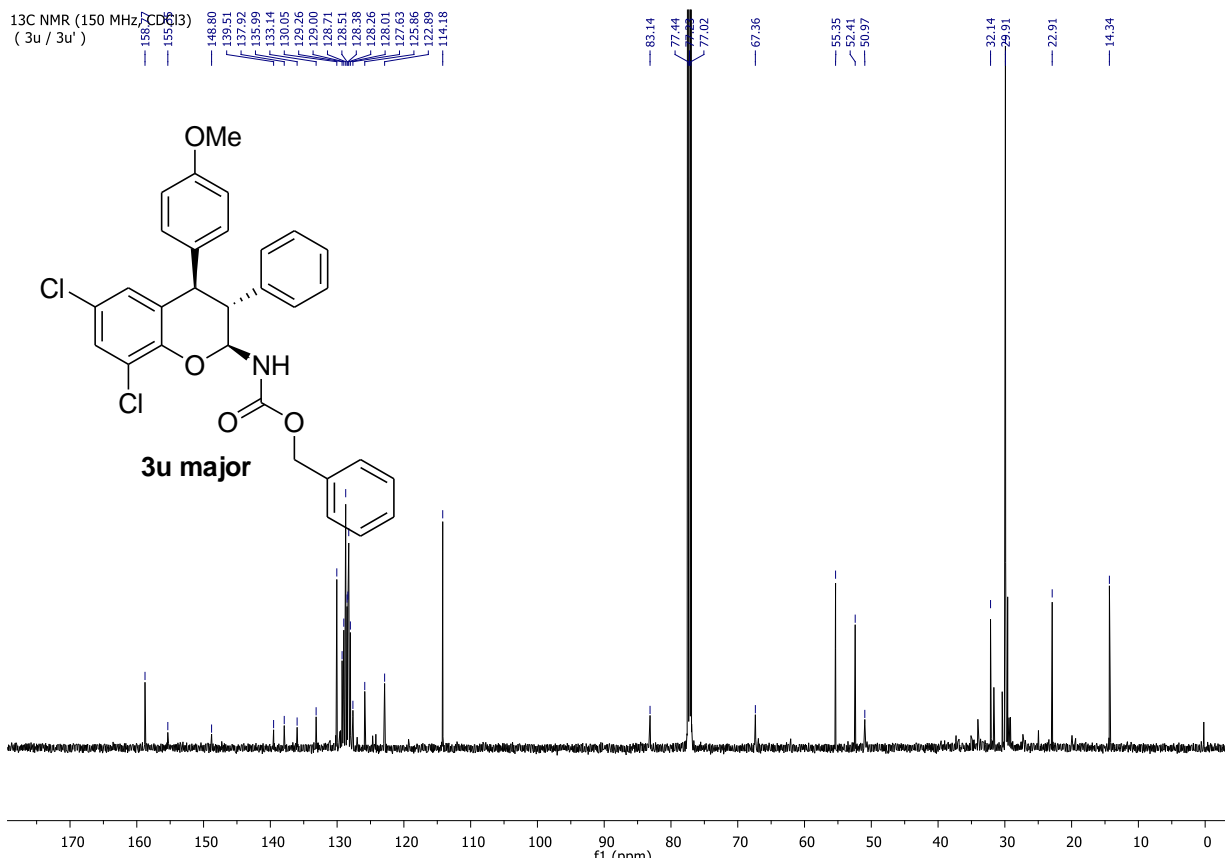

<sup>1</sup>H NMR (600 MHz, CDCl<sub>3</sub>)  
(3v / 3v')

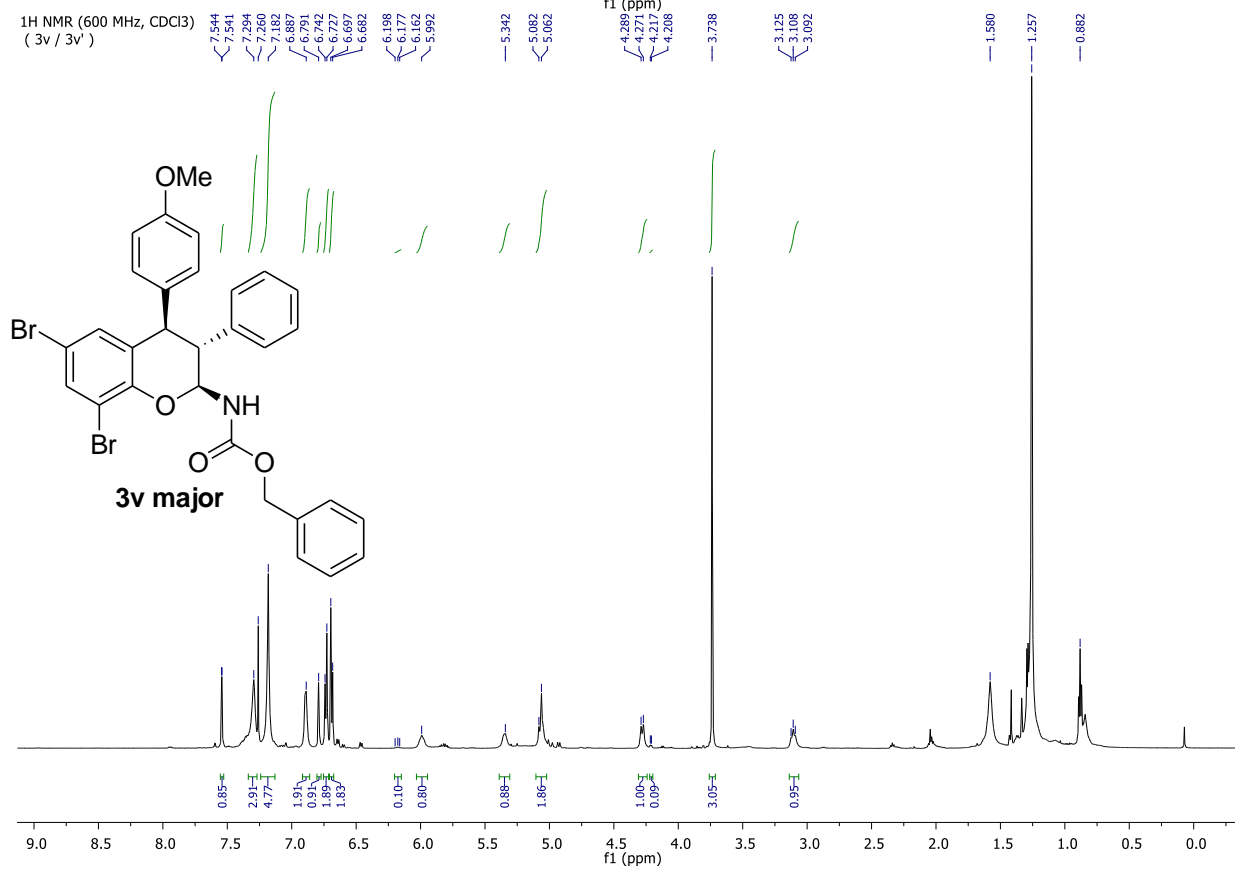

<sup>1</sup>H NMR (600 MHz, CDCl<sub>3</sub>)  
(3v / 3v')

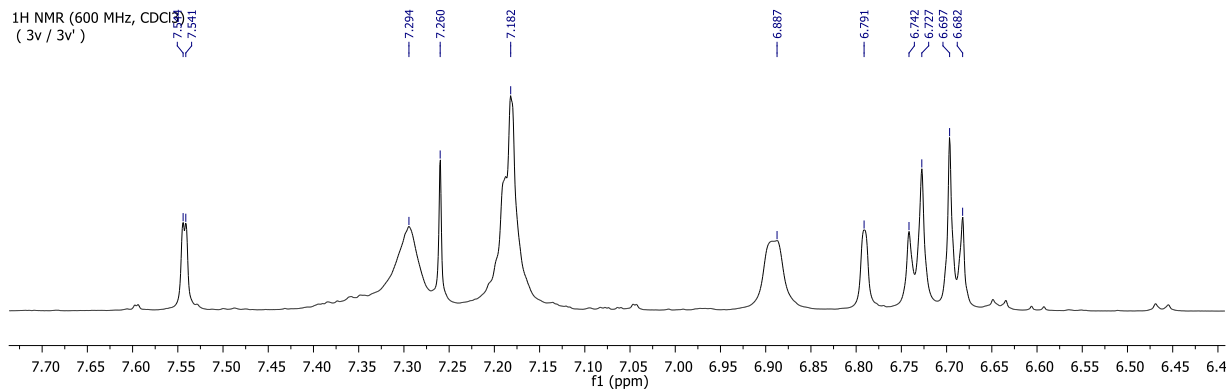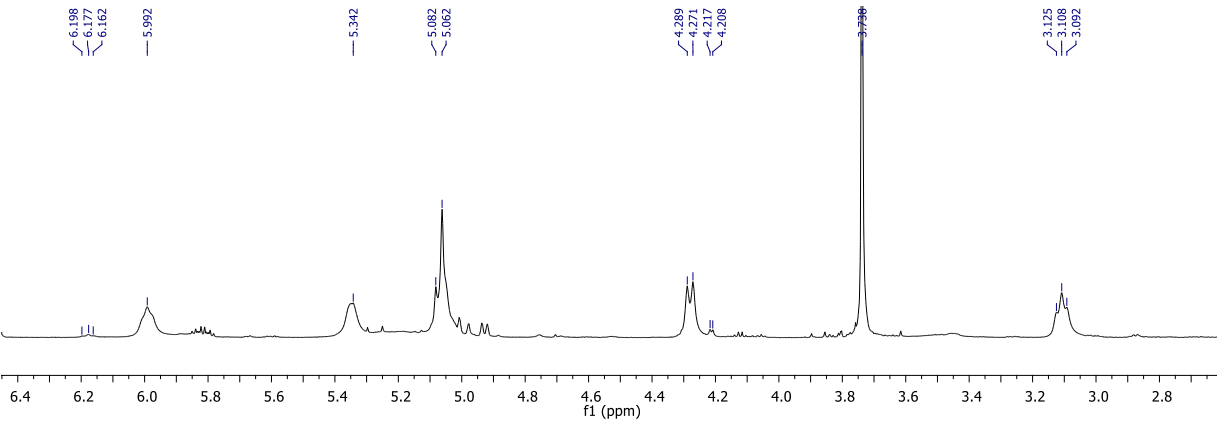

<sup>13</sup>C NMR (150 MHz, CDCl<sub>3</sub>)  
(3v / 3v')

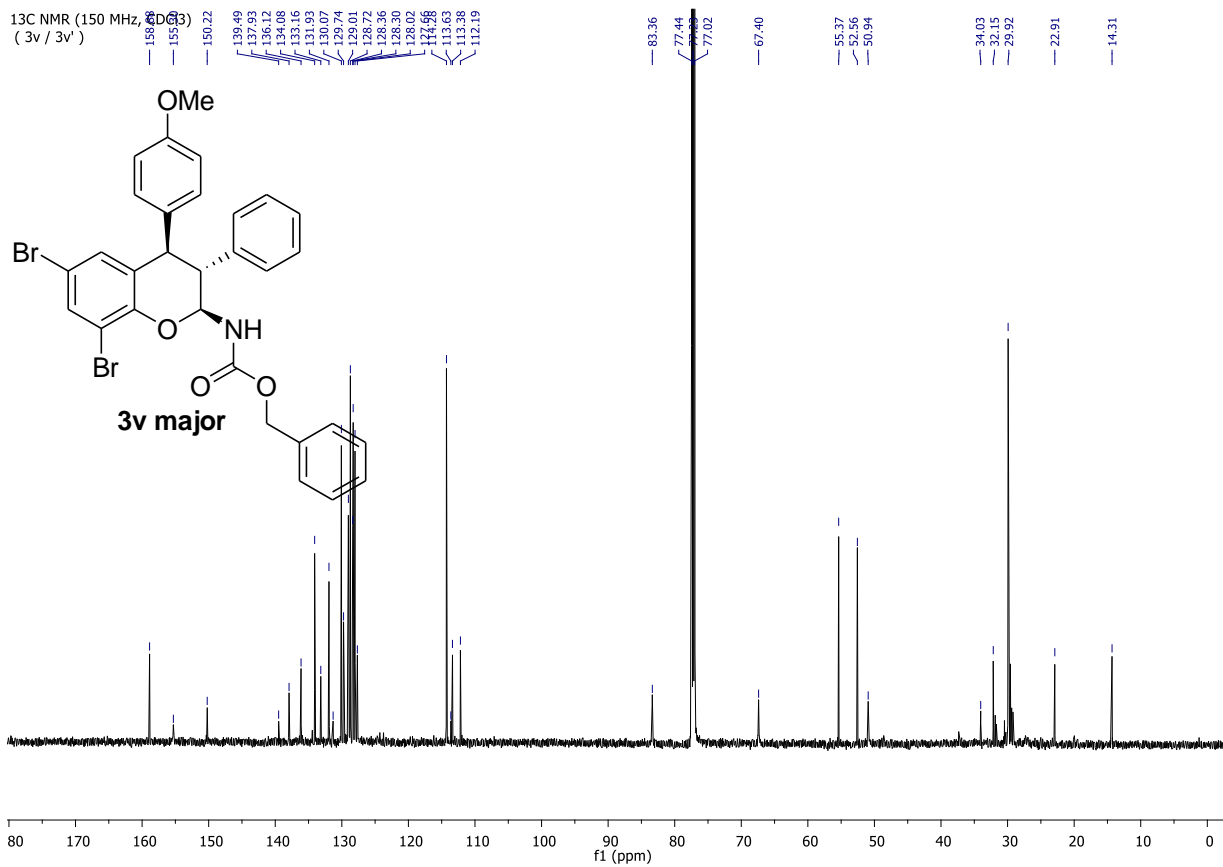

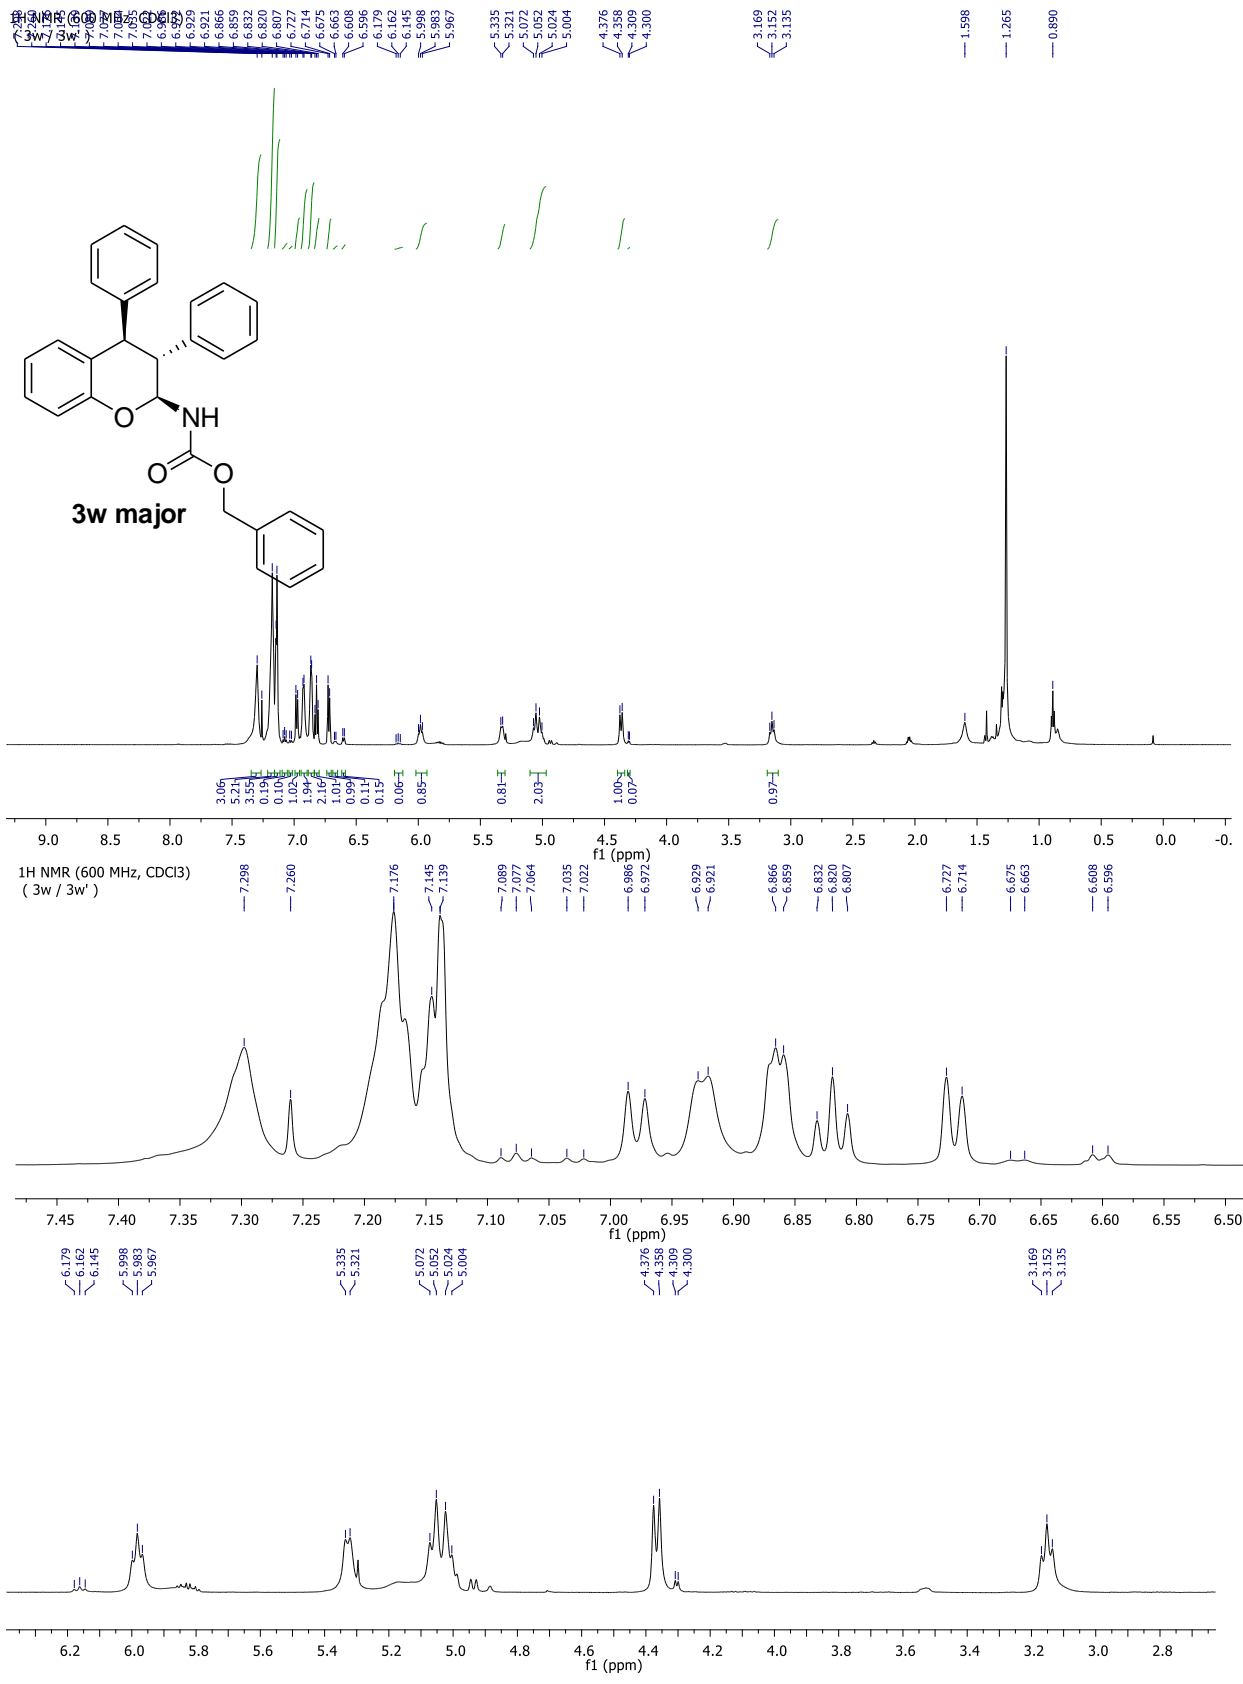



<sup>13</sup>C NMR (150 MHz, CDCl<sub>3</sub>)  
(3w / 3w')

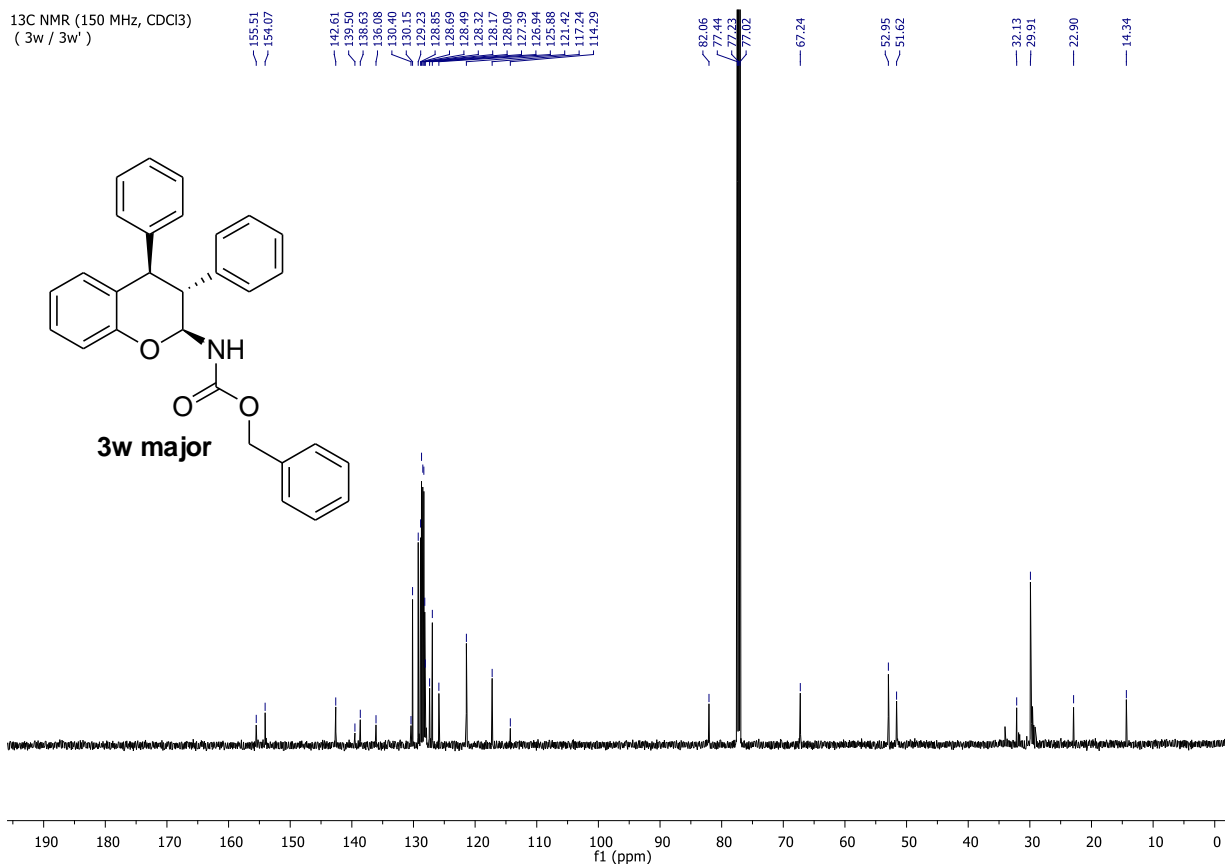

<sup>1</sup>H NMR (300 MHz, CDCl<sub>3</sub>) (3x / 3x')

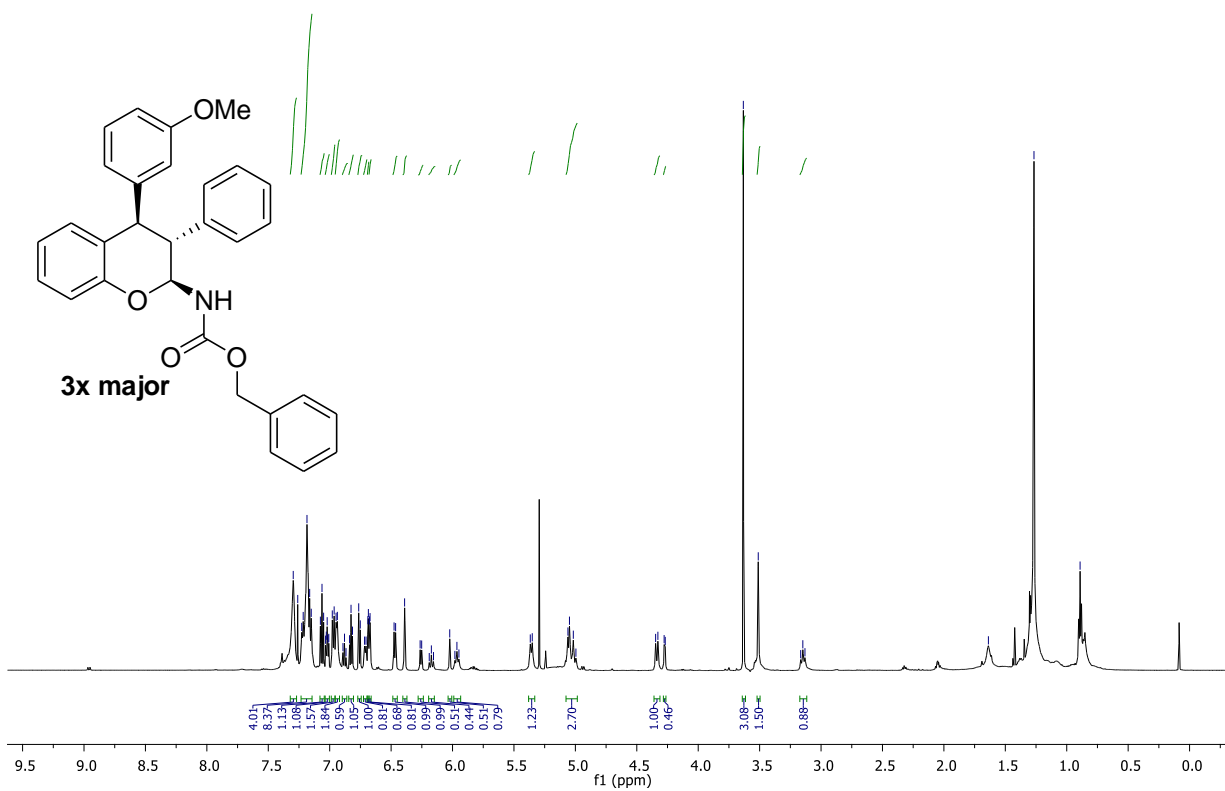

1H NMR (600 MHz, CDCl<sub>3</sub>)  
(3x / 3x')

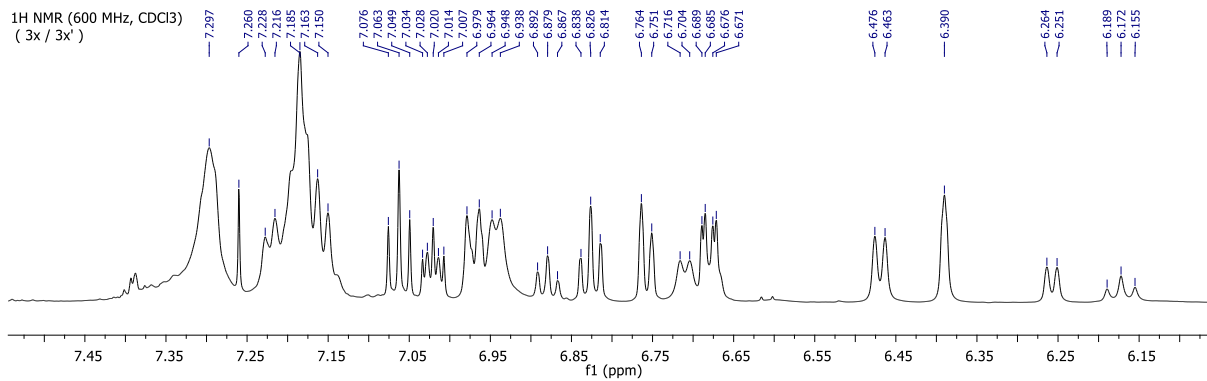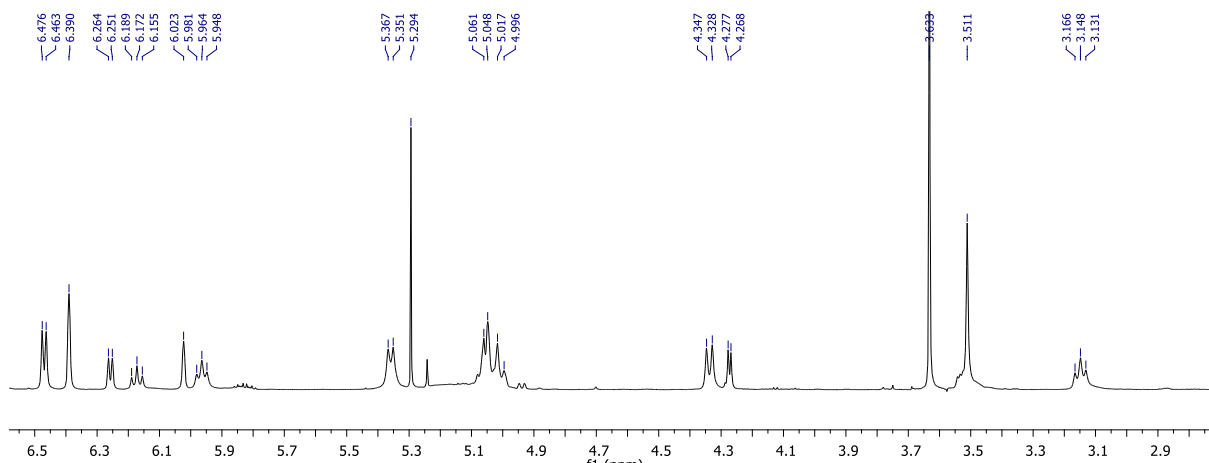

13C NMR (150 MHz, CDCl<sub>3</sub>)  
(3x / 3x')

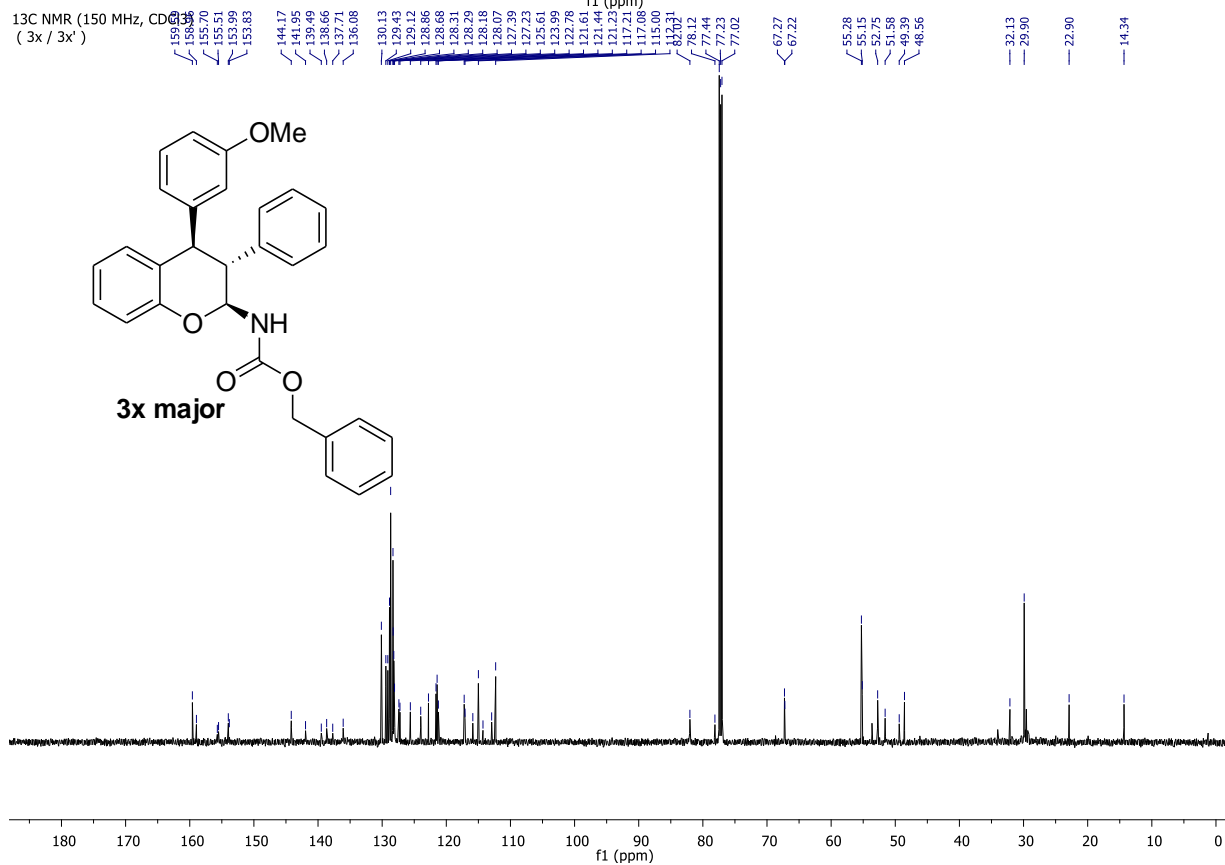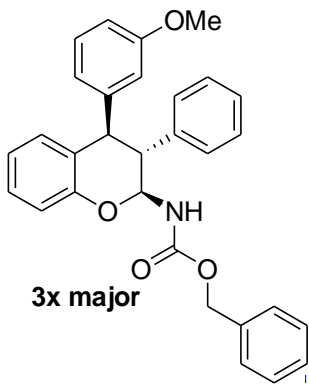

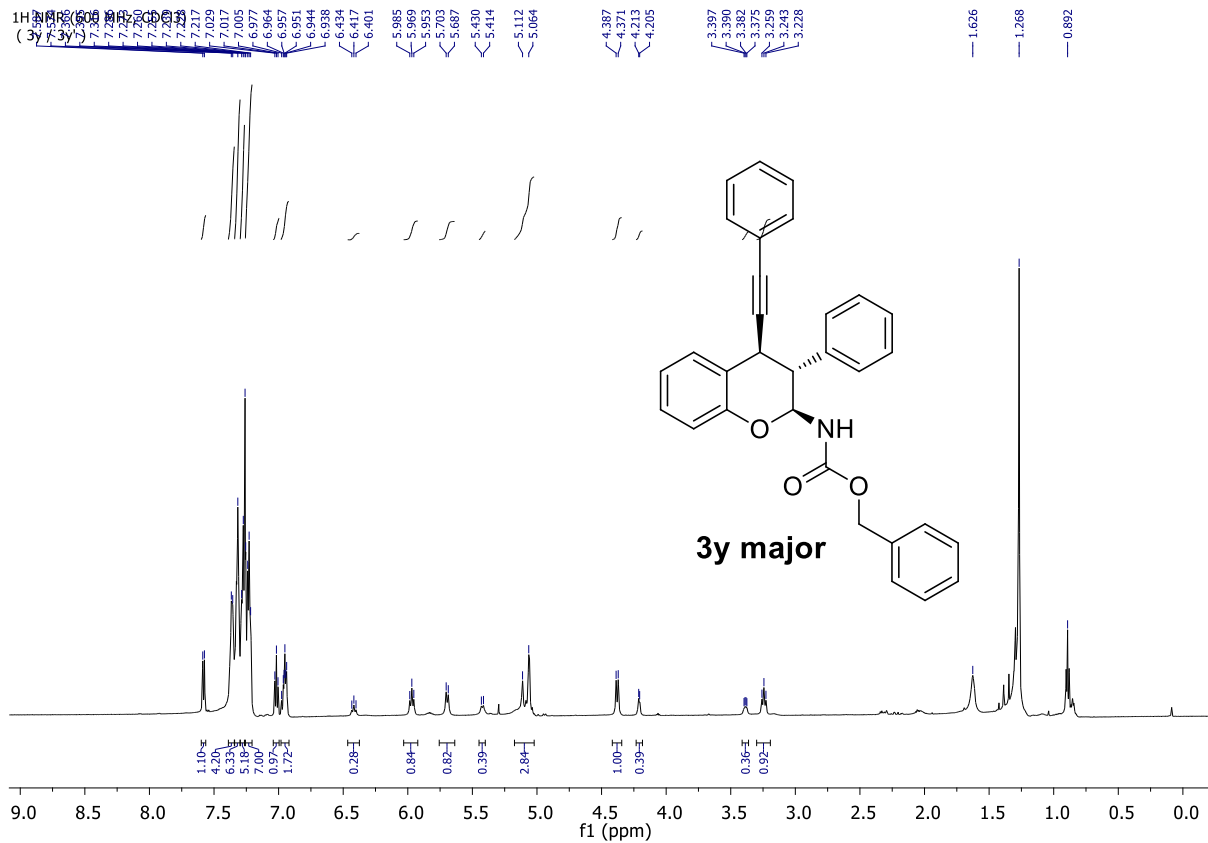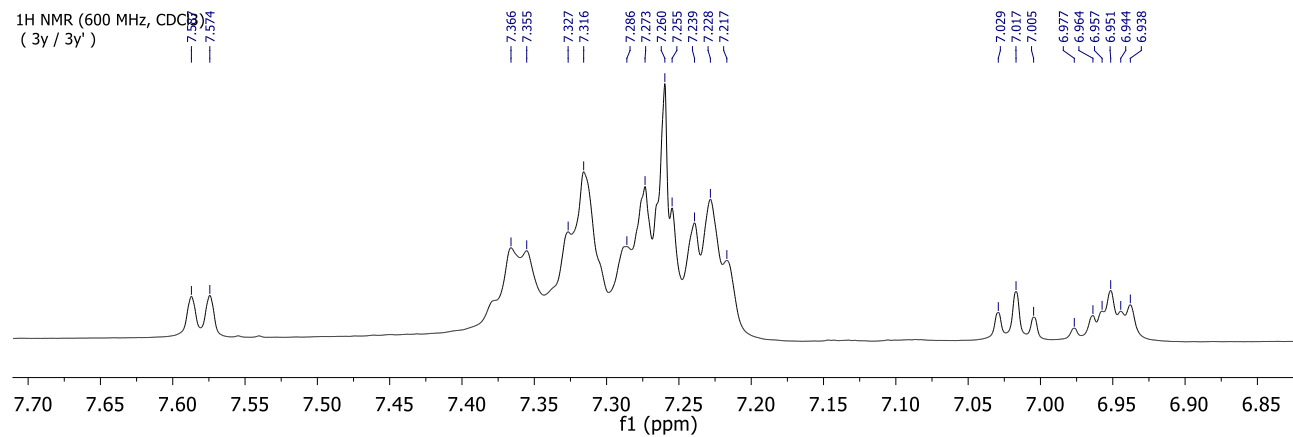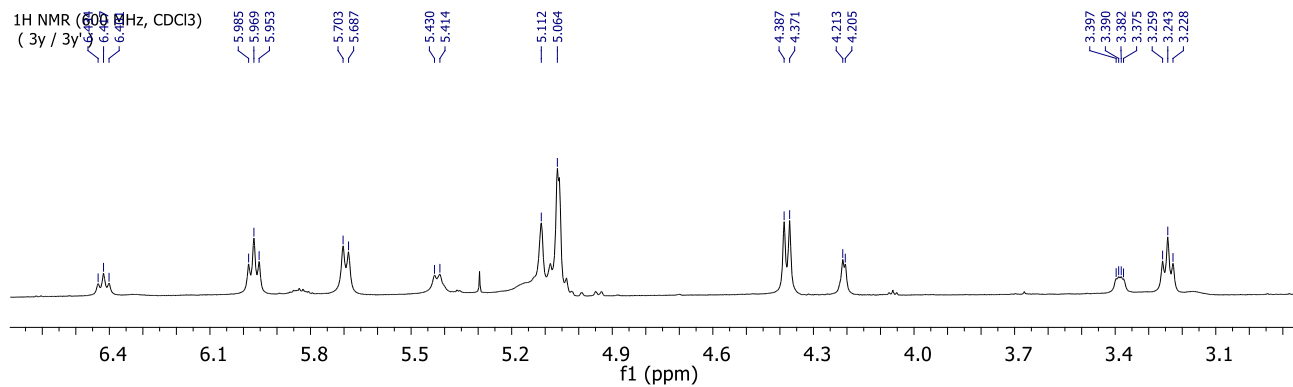

<sup>13</sup>C NMR (100 MHz, CDCl<sub>3</sub>)  
(3y / 3y')

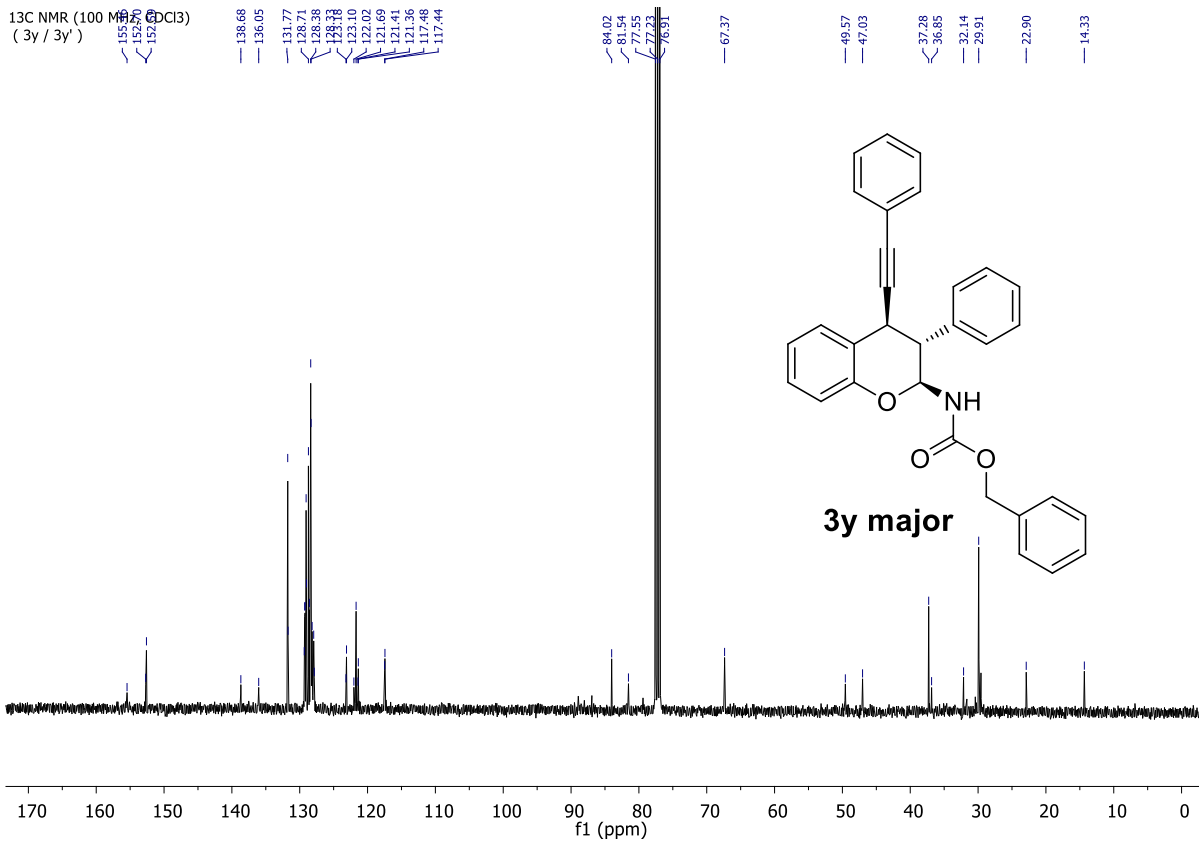

### 10. HSQC data of product (3a):

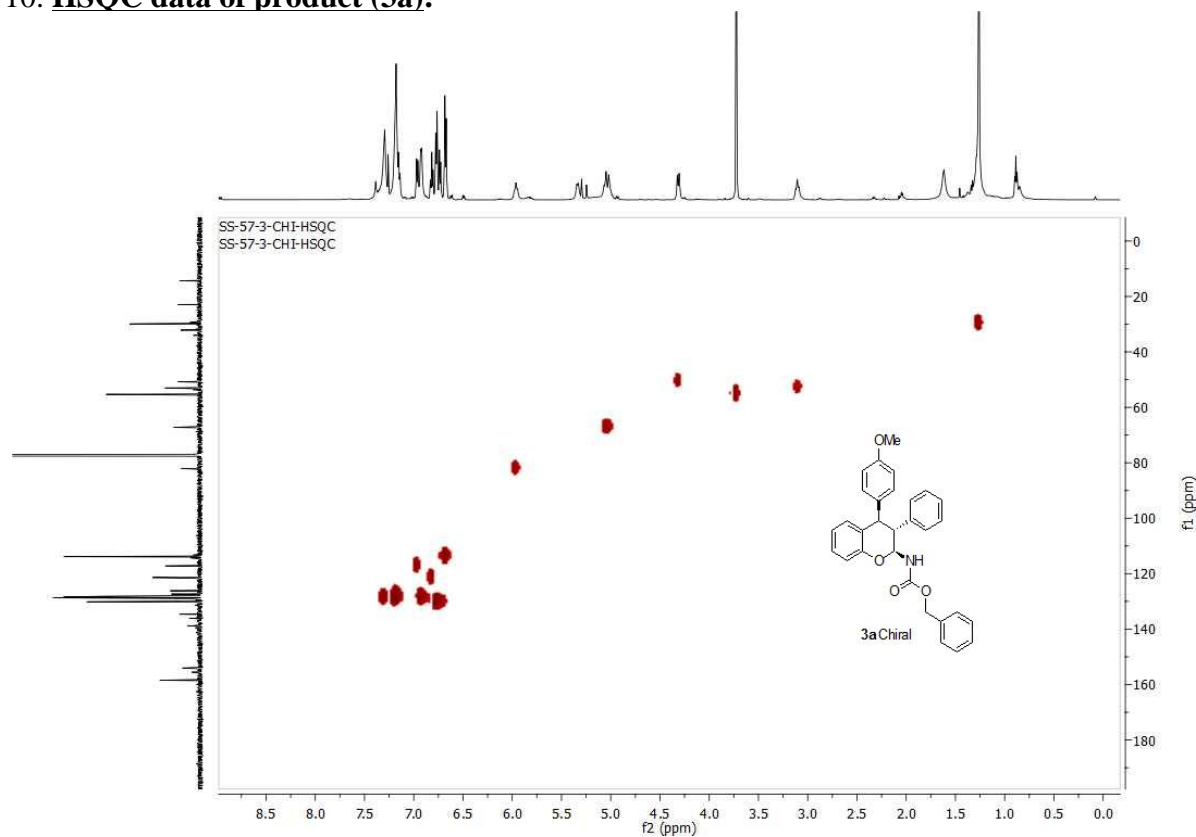

11. **COSY and 1D NOE spectra for relative stereochemistry of product (Table 1, entry 1)**  
**(3a/3a')**

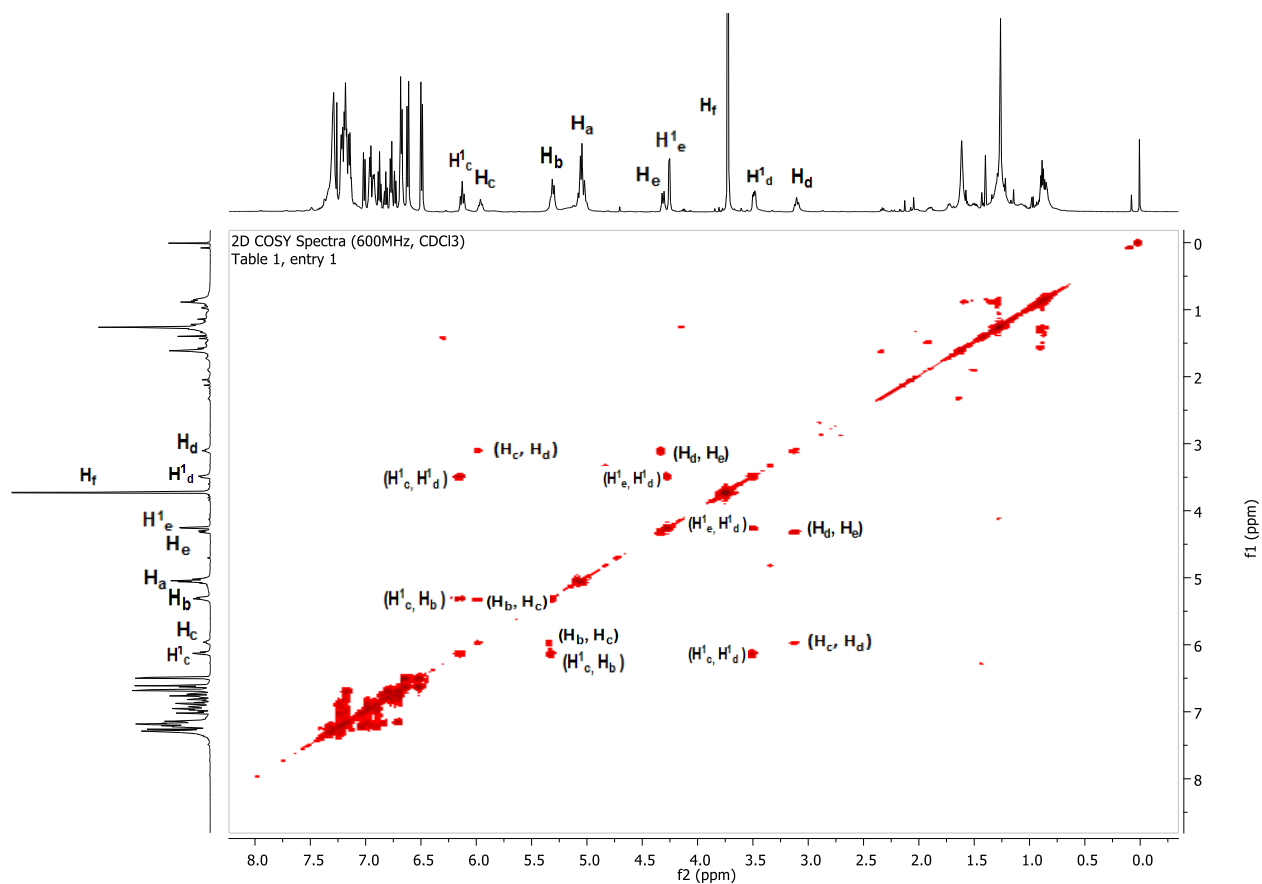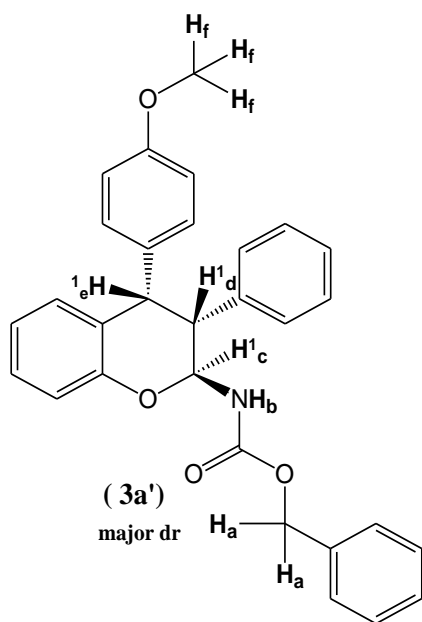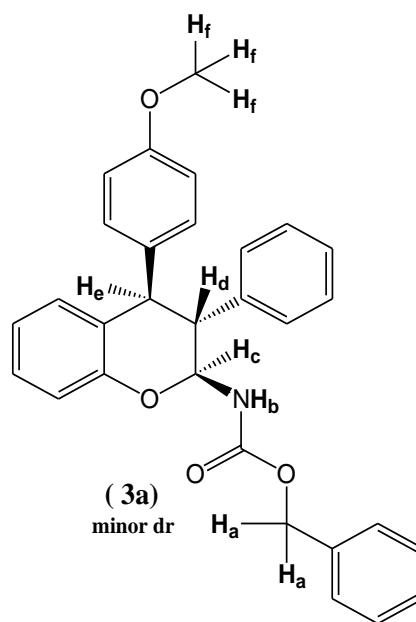

1H NMR (600 MHz, CDCl<sub>3</sub>)  
BINOL P.A-TOLUENE

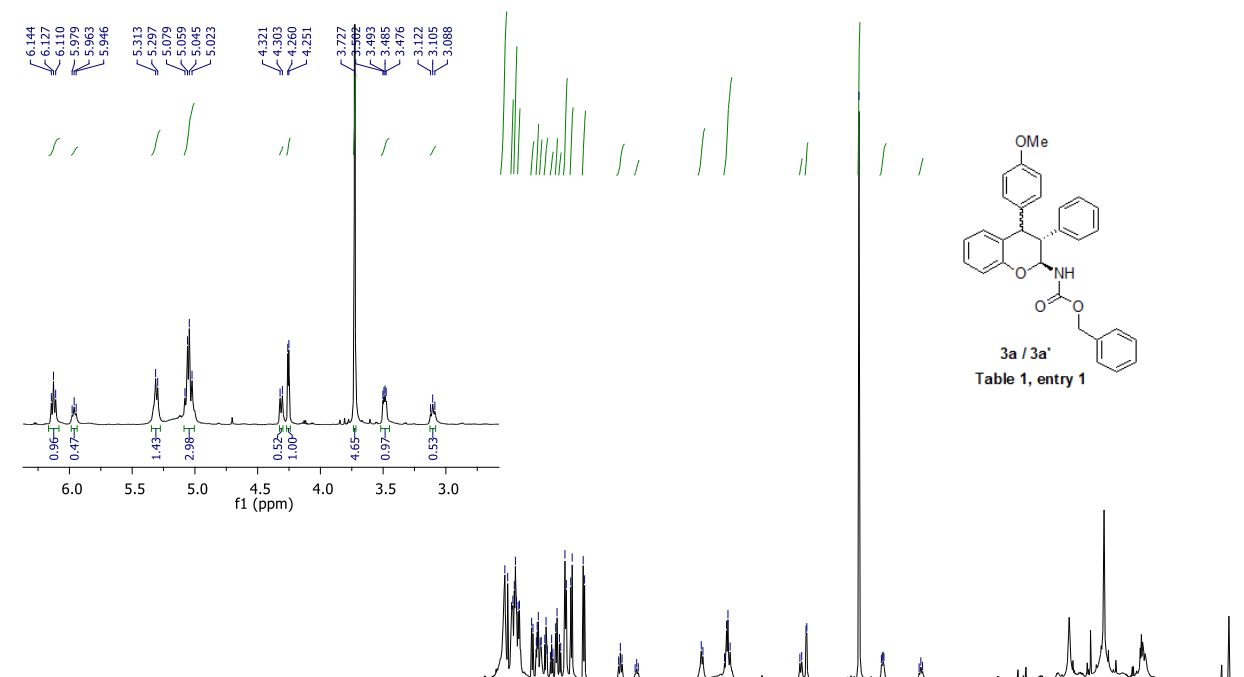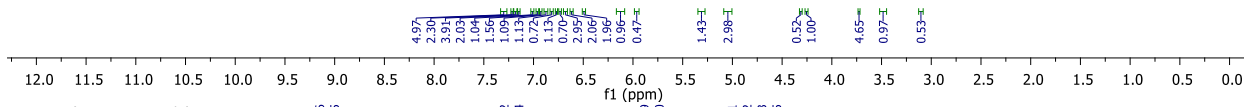

1D NOE (600 MHz, CDCl<sub>3</sub>)  
Table 1, entry 1

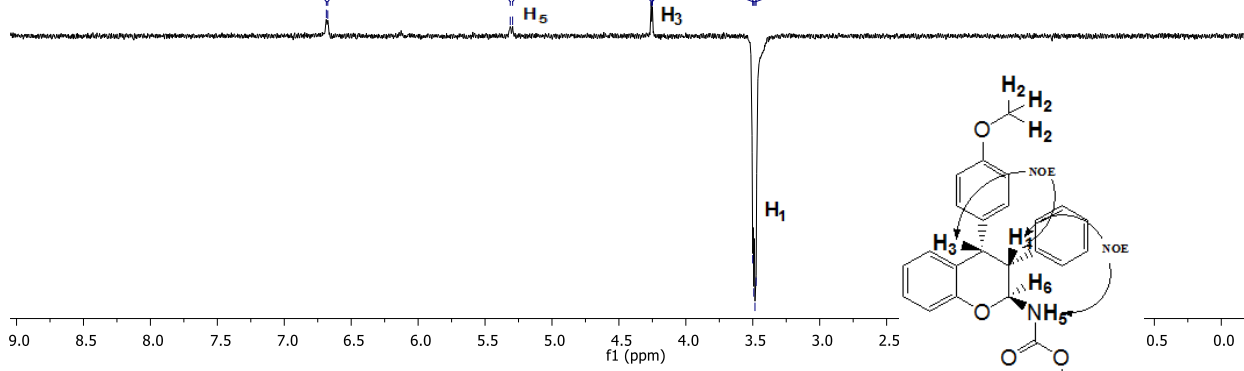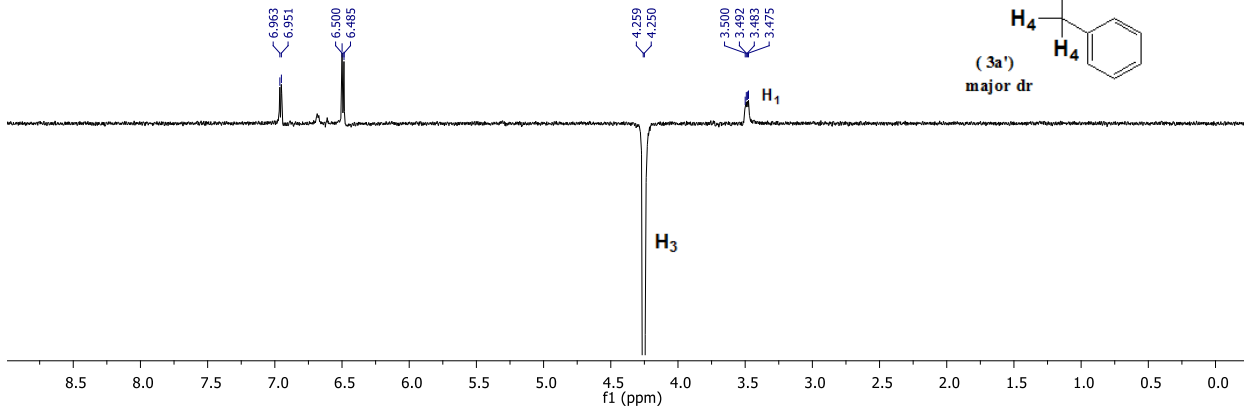

1D NOE (600 MHz, CDCl<sub>3</sub>)  
Table 1, entry 1

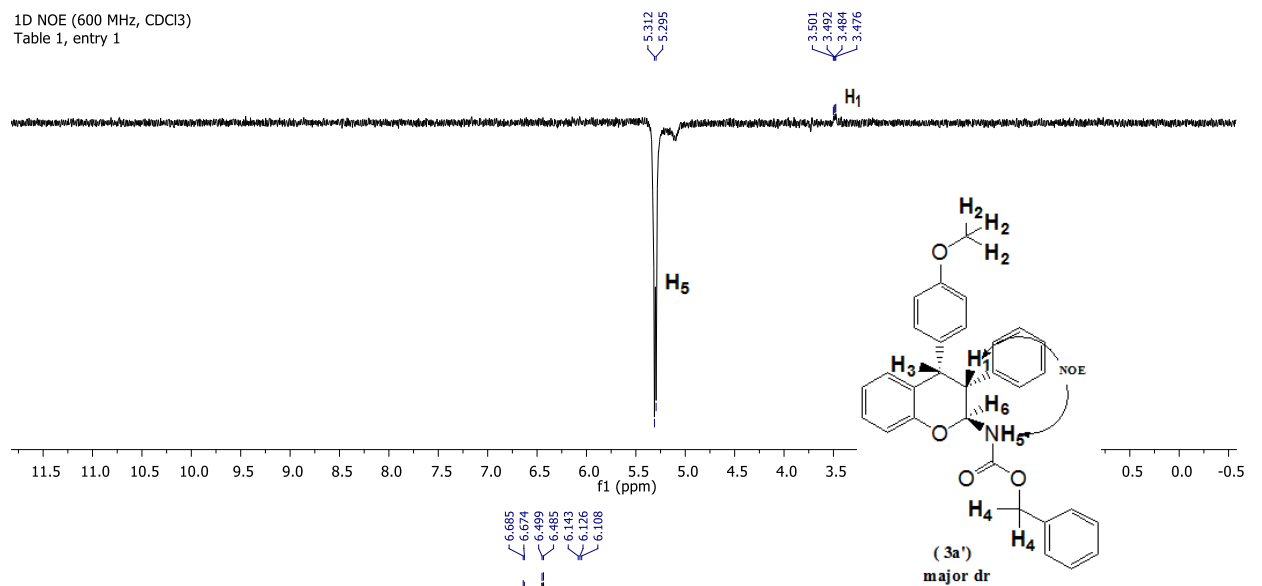

1D NOE (600 MHz, CDCl<sub>3</sub>)  
Table 1, entry 1

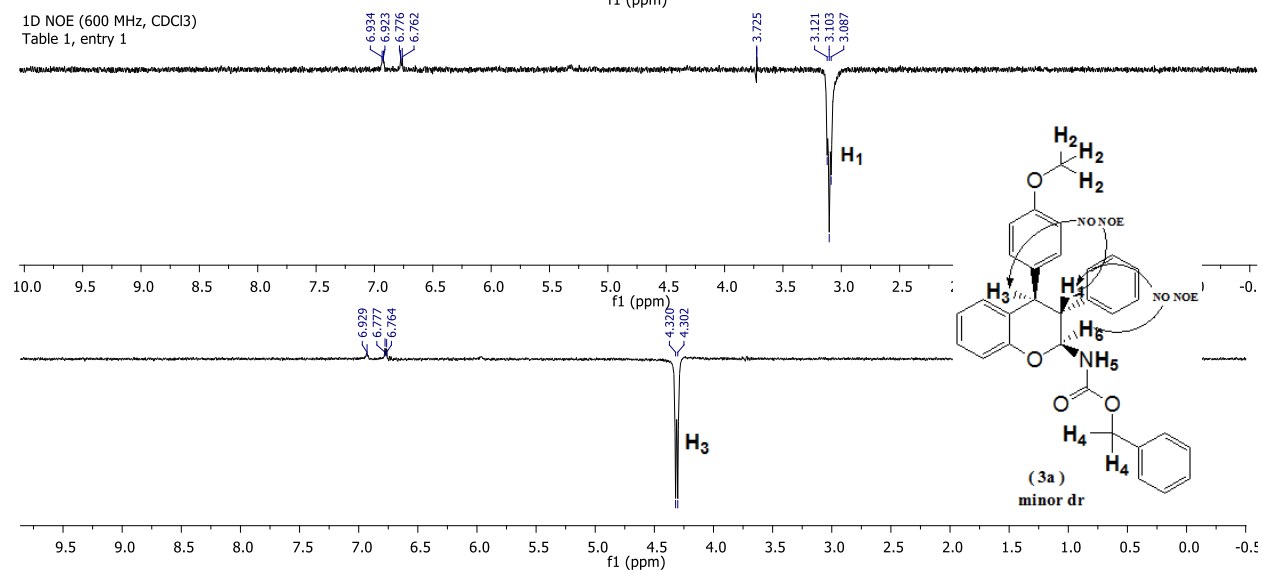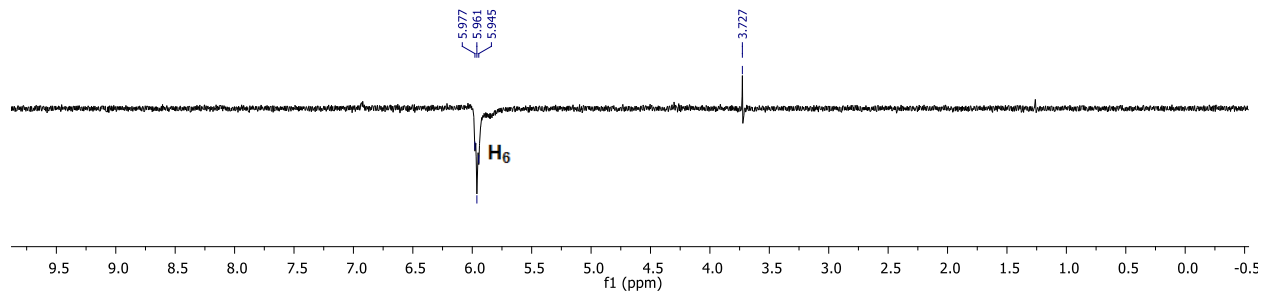

**COSY and 1D NOE spectra for relative stereochemistry of product (3a), (Table 1, entry 6)**

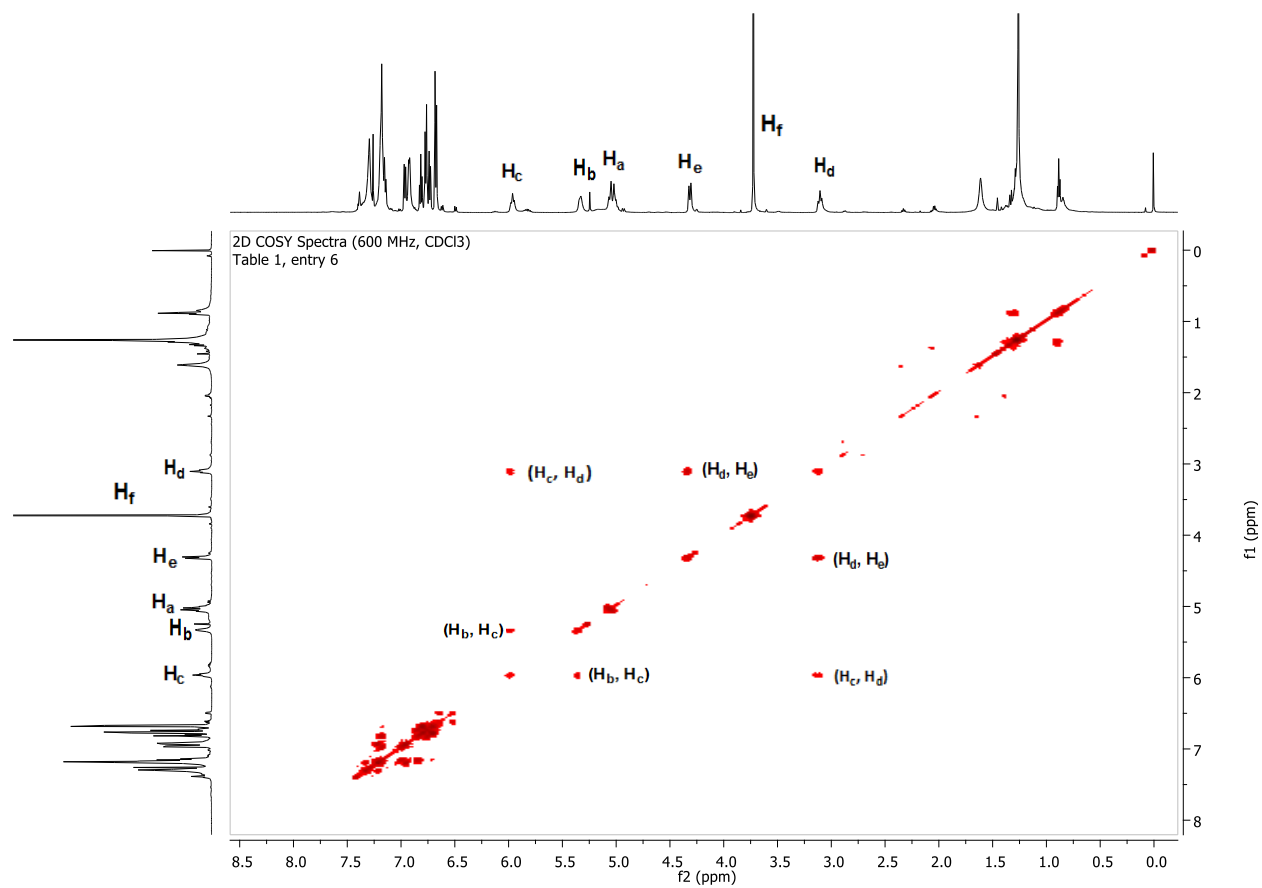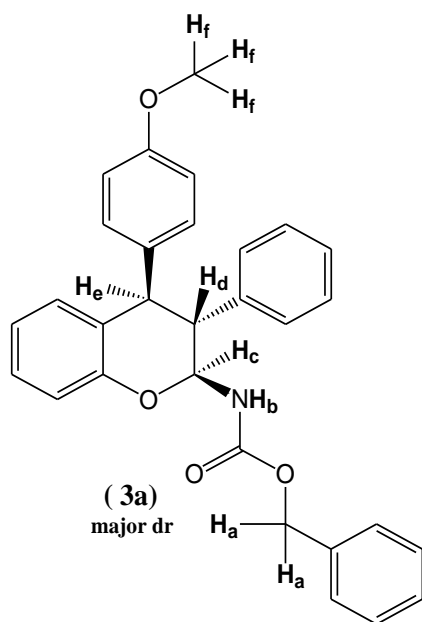



1D NOE (600 MHz, CDCl<sub>3</sub>)  
Table 1, entry 6

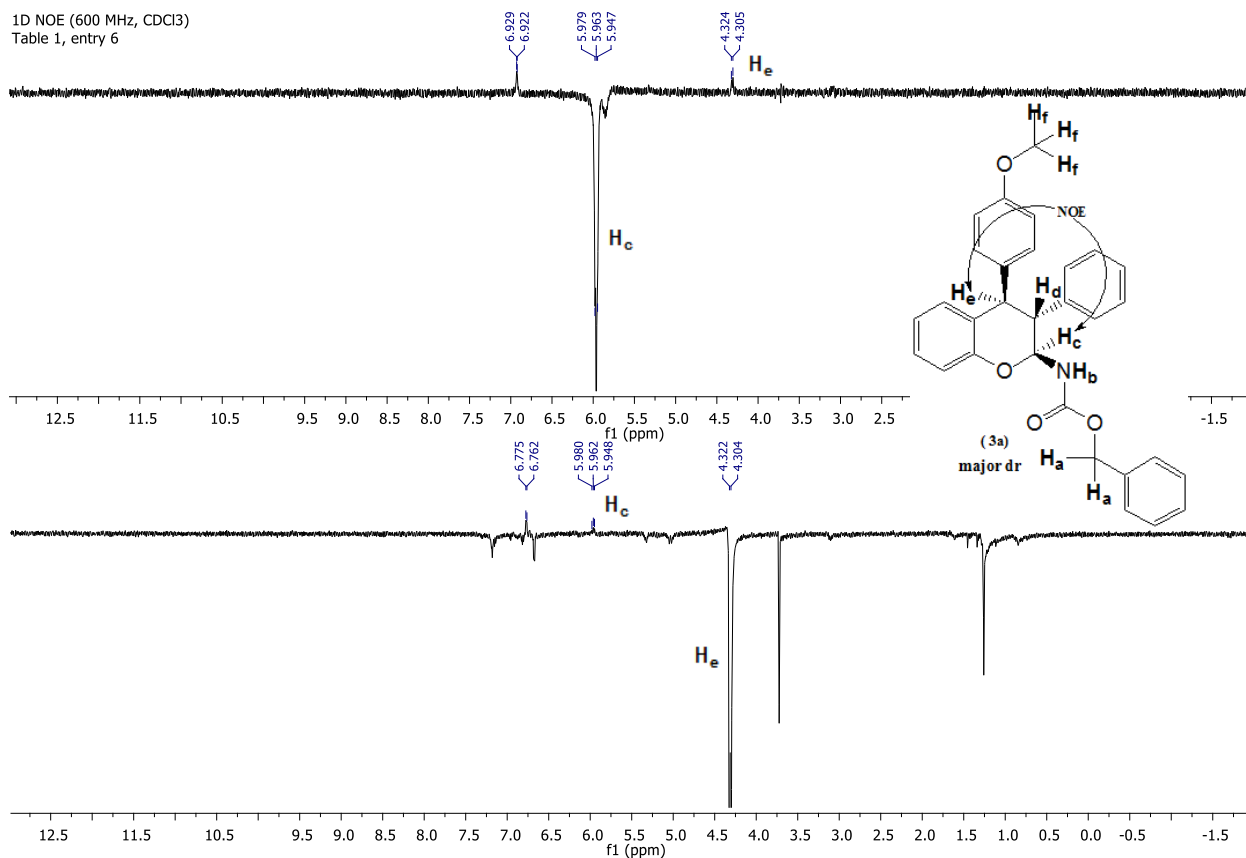

1D NOE (600 MHz, CDCl<sub>3</sub>)  
Table 1, entry 6

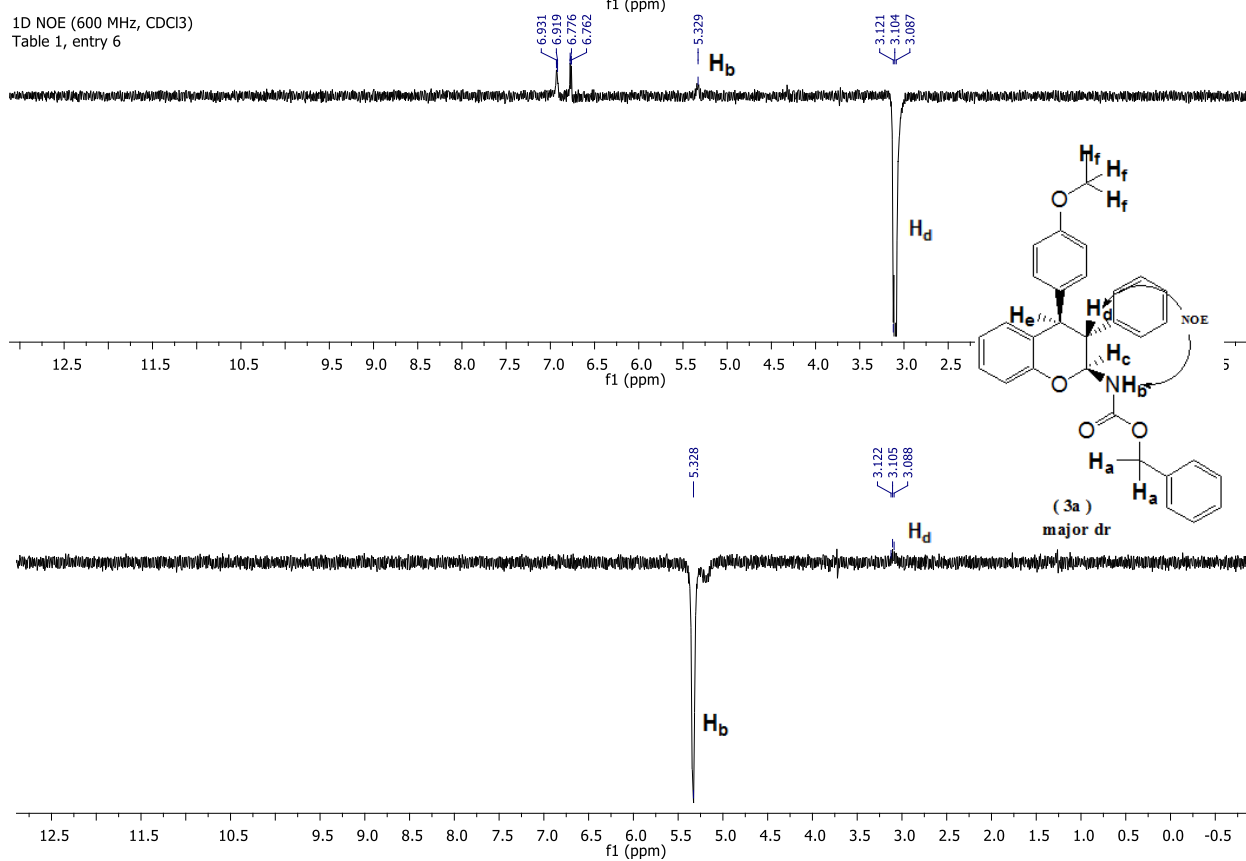

## COSY and NOESY spectra for relative stereochemistry of product (3b)

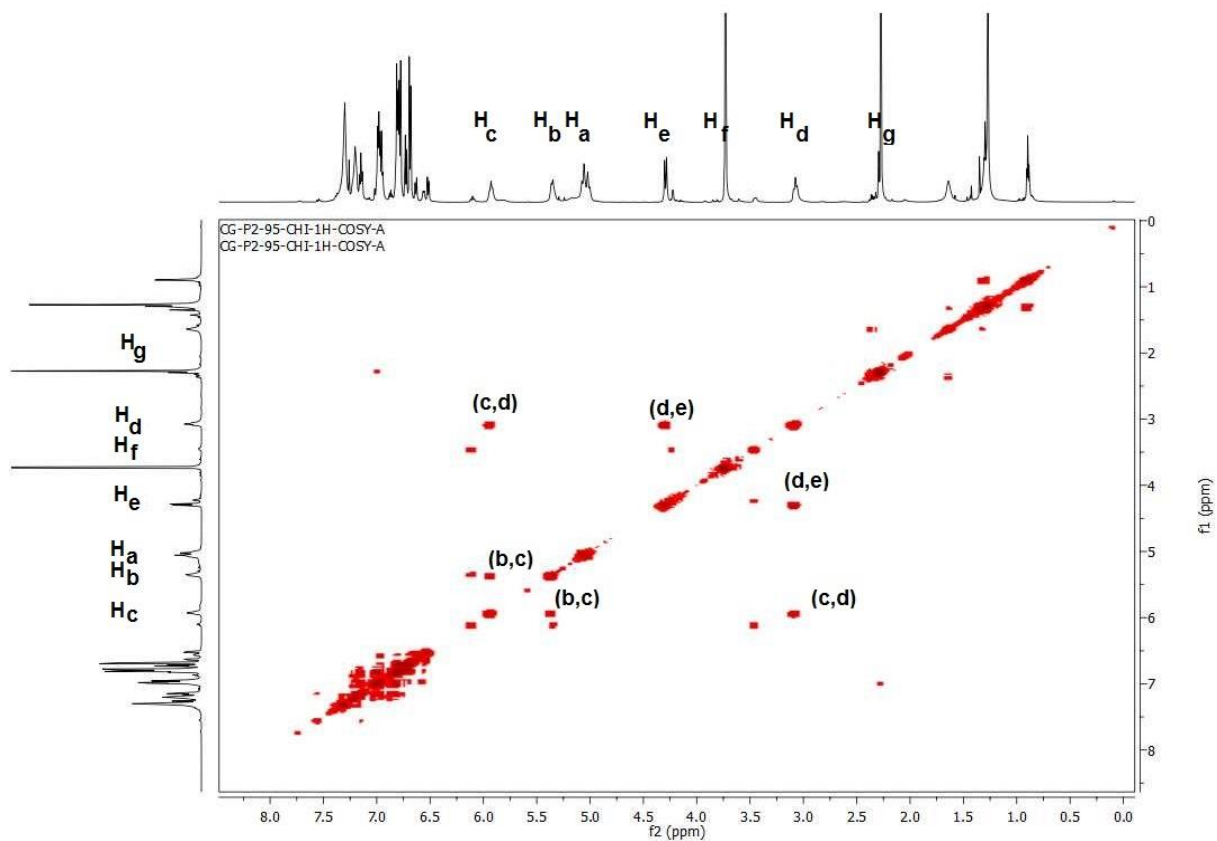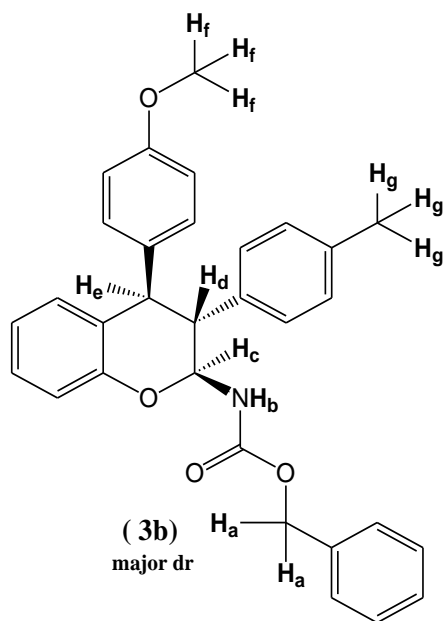

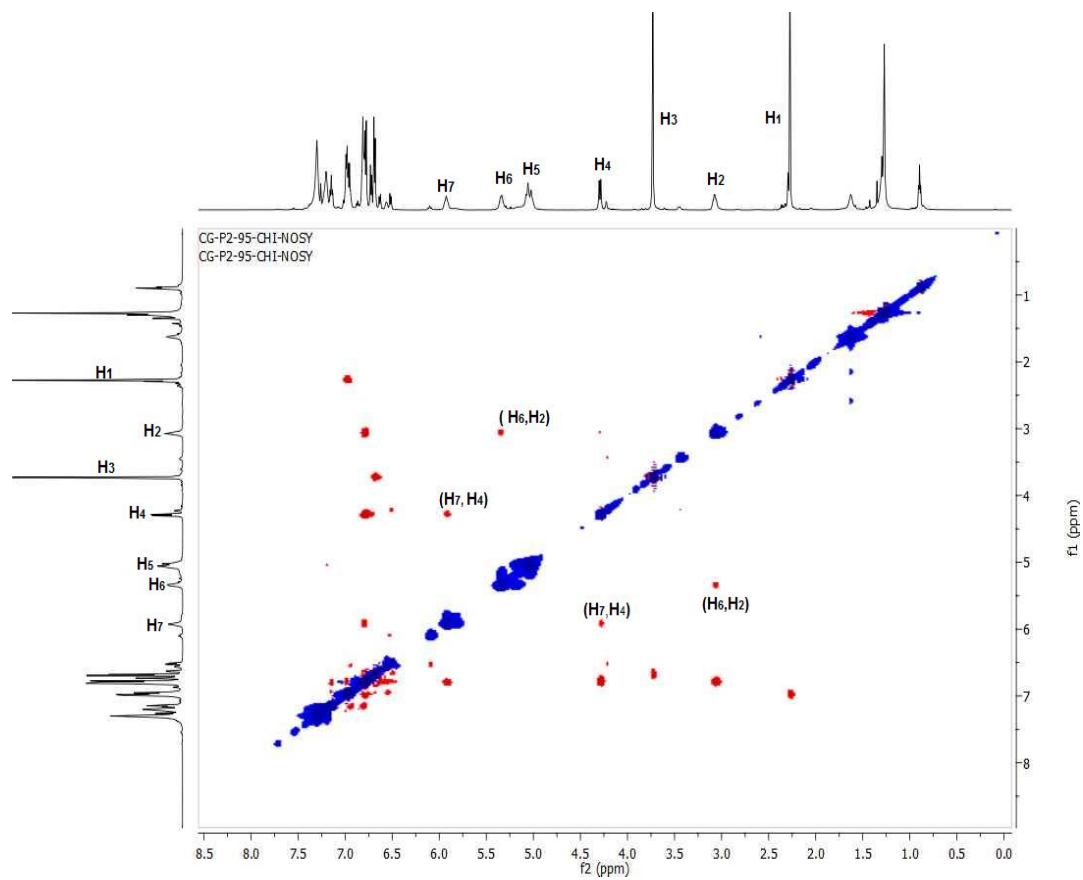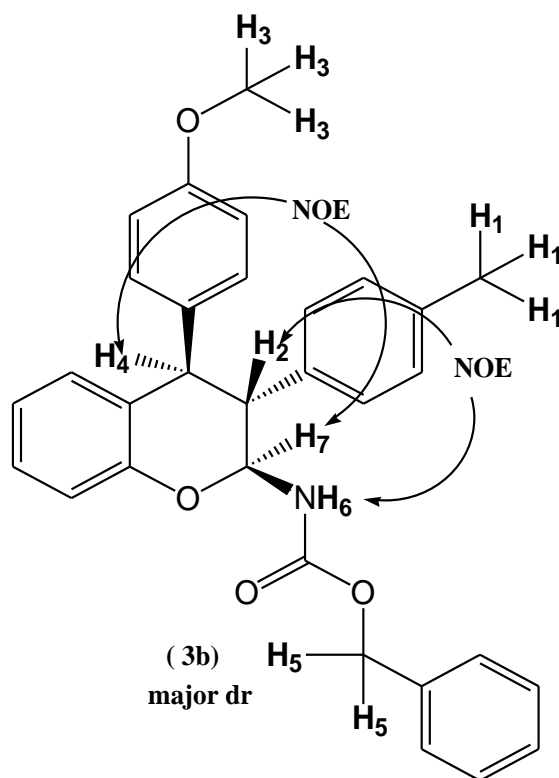

## 12. HPLC Chromatogram:

SS-57-RAC-IC

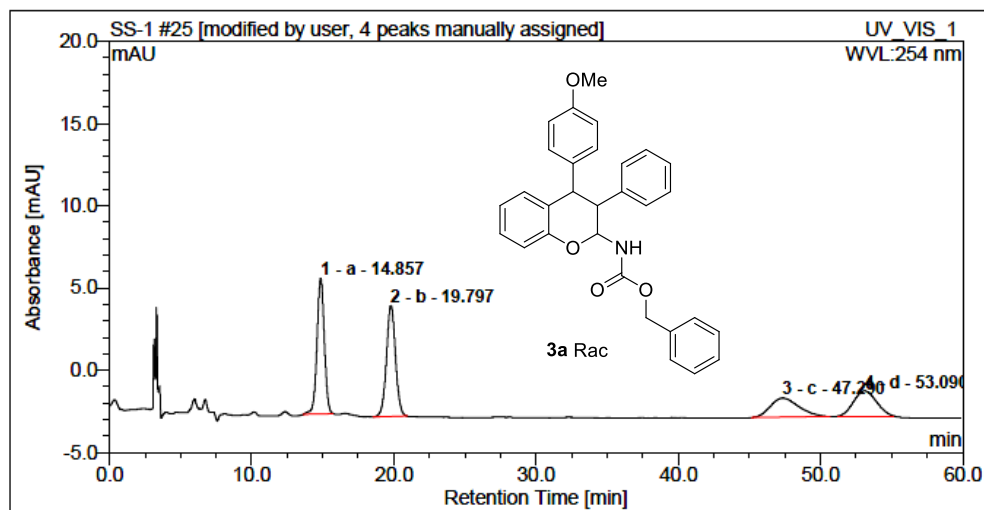

| No. | Peak Name | Ret.Time (detected)<br>min | Area<br>mAU*min | Rel.Area(ident.)<br>% | Height<br>mAU | Amount |
|-----|-----------|----------------------------|-----------------|-----------------------|---------------|--------|
| 1   | a         | 14.86                      | 4.923752        | 32.0145676            | 8.24147       | n.a.   |
| 2   | b         | 19.80                      | 4.9754          | 32.35038778           | 6.75735       | n.a.   |
| 3   | c         | 47.29                      | 2.682175        | 17.43967992           | 1.16426       | n.a.   |
| 4   | d         | 53.09                      | 2.798           | 18.19536471           | 1.524         | n.a.   |

SS-57-CHI-IC

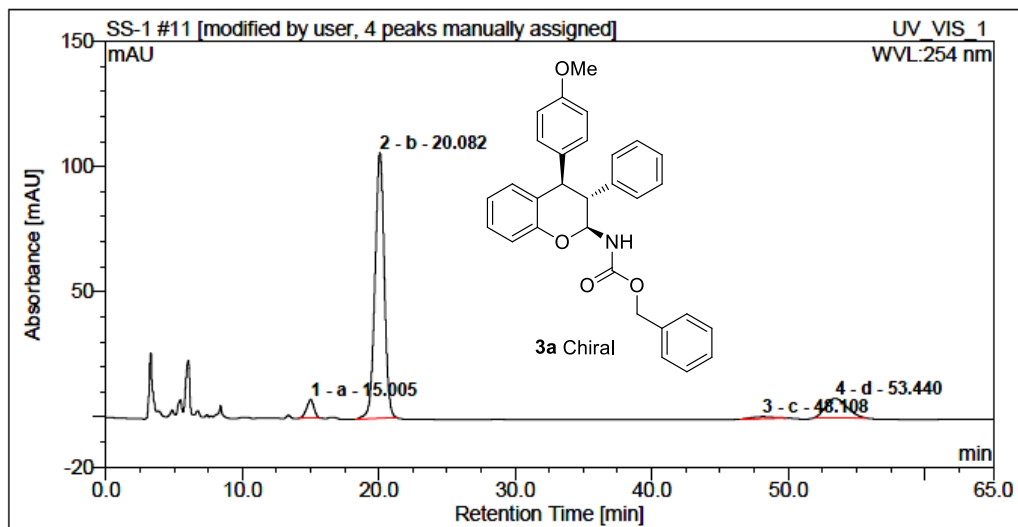

| No. | Peak Name | Ret.Time (detected)<br>min | Area<br>mAU*min | Rel.Area(ident.)<br>% | Height<br>mAU | Amount |
|-----|-----------|----------------------------|-----------------|-----------------------|---------------|--------|
| 1   | a         | 15.01                      | 4.623583        | 4.472750321           | 7.364         | n.a.   |
| 2   | b         | 20.08                      | 83.6376         | 80.90914224           | 106.2197      | n.a.   |
| 3   | c         | 48.11                      | 1.329568        | 1.286194158           | 0.75086       | n.a.   |
| 4   | d         | 53.44                      | 13.781          | 13.33191328           | 7.645         | n.a.   |

P2-90-RAC-IA

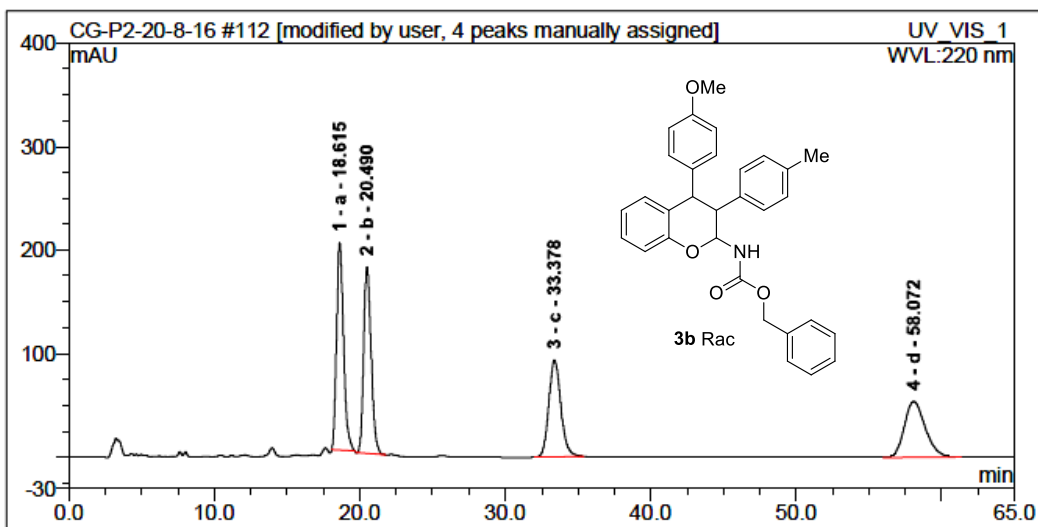

| No. | Peak Name | Ret.Time (detected)<br>min | Area<br>mAU*min | Rel.Area(ident.)<br>% | Height<br>mAU | Amount |
|-----|-----------|----------------------------|-----------------|-----------------------|---------------|--------|
| 1   | a         | 18.62                      | 111.2762        | 27.86351322           | 200.5874      | n.a.   |
| 2   | b         | 20.49                      | 107.369         | 26.88515748           | 180.3395      | n.a.   |
| 3   | c         | 33.38                      | 90.33453        | 22.6197375            | 93.59877      | n.a.   |
| 4   | d         | 58.07                      | 90.382          | 22.6315918            | 54.159        | n.a.   |

P2-90-CHI-IA

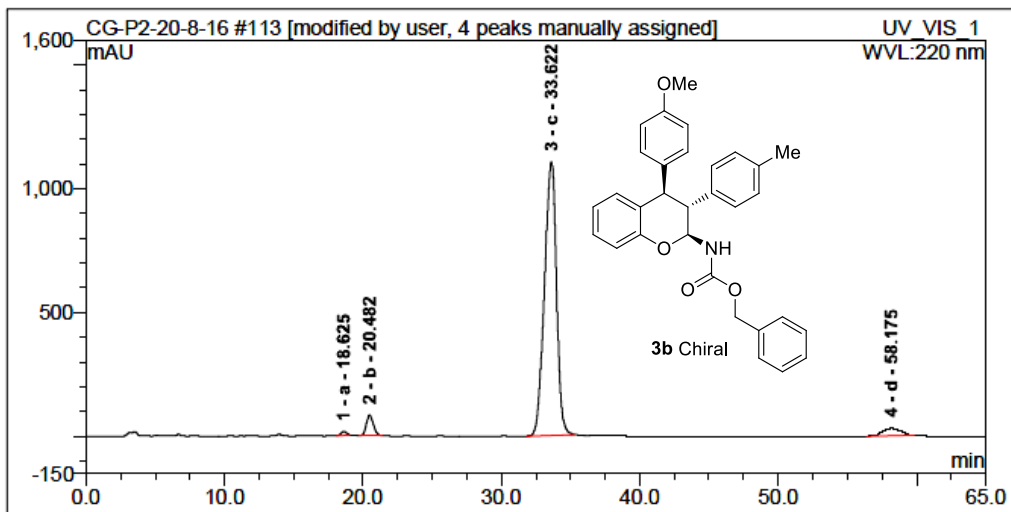

| No. | Peak Name | Ret.Time (detected)<br>min | Area<br>mAU*min | Rel.Area(ident.)<br>% | Height<br>mAU | Amount |
|-----|-----------|----------------------------|-----------------|-----------------------|---------------|--------|
| 1   | a         | 18.63                      | 7.463579        | 0.614450587           | 15.95955      | n.a.   |
| 2   | b         | 20.48                      | 49.41242        | 4.067953051           | 84.40162      | n.a.   |
| 3   | c         | 33.62                      | 1111.585        | 91.51293701           | 1105.709      | n.a.   |
| 4   | d         | 58.18                      | 46.214          | 3.80465935            | 30.689        | n.a.   |

P2-118-RAC-IC

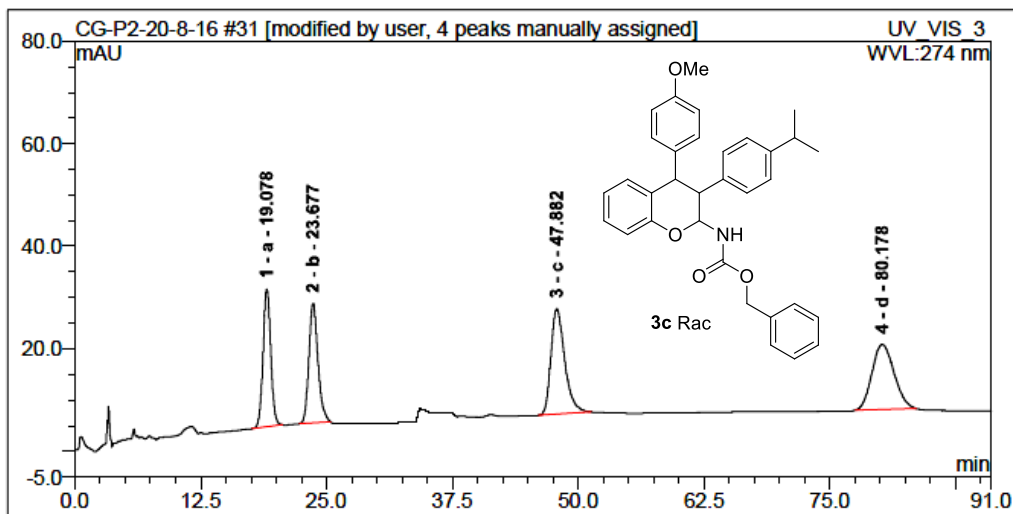

| No. | Peak Name | Ret.Time (detected)<br>min | Area<br>mAU*min | Rel.Area(ident.)<br>% | Height<br>mAU | Amount |
|-----|-----------|----------------------------|-----------------|-----------------------|---------------|--------|
| 1   | a         | 19.08                      | 23.90745        | 21.12592507           | 26.87354      | n.a.   |
| 2   | b         | 23.68                      | 24.39004        | 21.55237399           | 23.27715      | n.a.   |
| 3   | c         | 47.88                      | 32.67547        | 28.87382799           | 20.57732      | n.a.   |
| 4   | d         | 80.18                      | 32.193          | 28.44787295           | 12.662        | n.a.   |

P2-118-CHI-IC

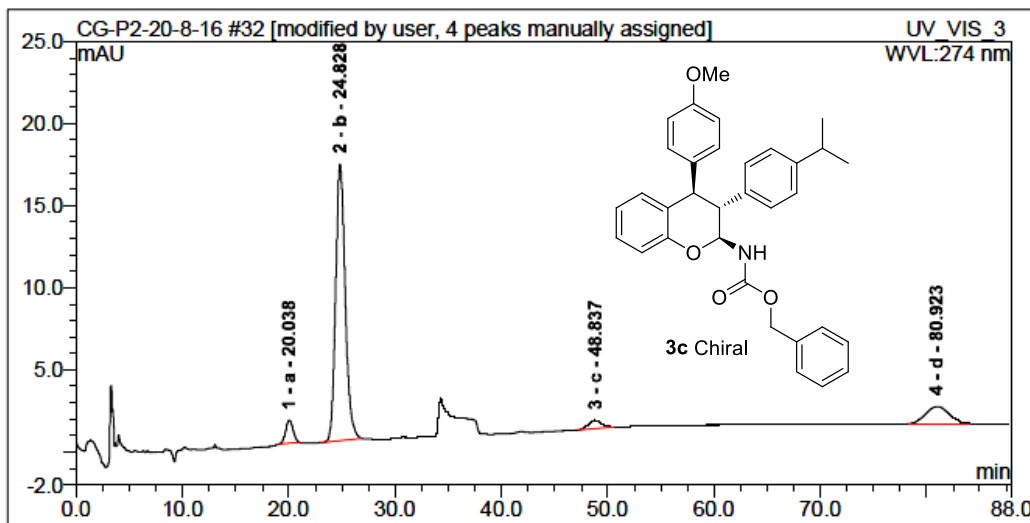

| No. | Peak Name | Ret.Time (detected)<br>min | Area<br>mAU*min | Rel.Area(ident.)<br>% | Height<br>mAU | Amount |
|-----|-----------|----------------------------|-----------------|-----------------------|---------------|--------|
| 1   | a         | 20.04                      | 1.13983         | 5.194469459           | 1.39749       | n.a.   |
| 2   | b         | 24.83                      | 17.44175        | 79.48605306           | 16.82985      | n.a.   |
| 3   | c         | 48.84                      | 0.727118        | 3.313645701           | 0.49335       | n.a.   |
| 4   | d         | 80.92                      | 2.634           | 12.00583178           | 1.046         | n.a.   |

P2-119-RAC-IC

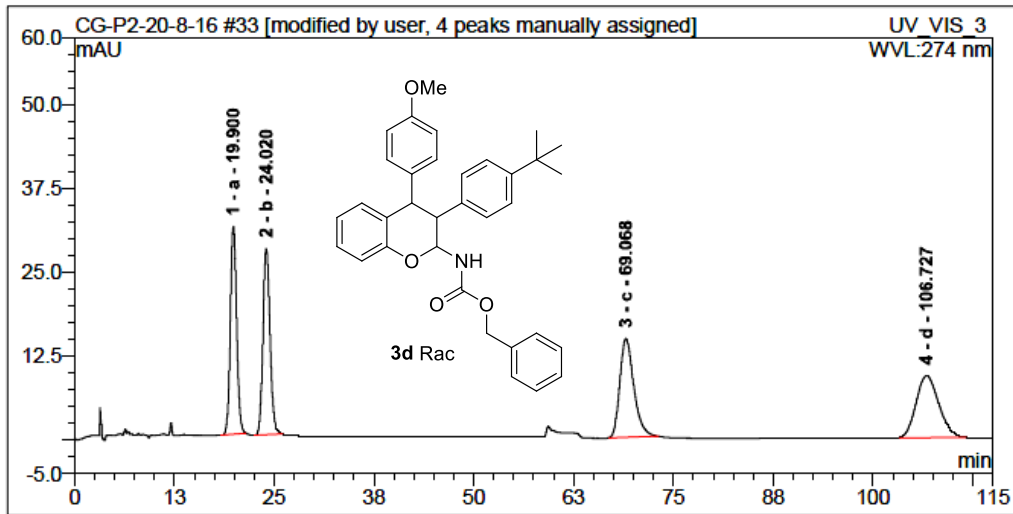

| No. | Peak Name | Ret.Time (detected)<br>min | Area<br>mAU*min | Rel.Area(ident.)<br>% | Height<br>mAU | Amount |
|-----|-----------|----------------------------|-----------------|-----------------------|---------------|--------|
| 1 a |           | 19.90                      | 28.15766        | 24.07601897           | 31.01408      | n.a.   |
| 2 b |           | 24.02                      | 28.45199        | 24.32768432           | 27.79985      | n.a.   |
| 3 c |           | 69.07                      | 29.98324        | 25.63697075           | 14.73311      | n.a.   |
| 4 d |           | 106.73                     | 30.360          | 25.95932596           | 9.243         | n.a.   |

P2-119-CHI-IC

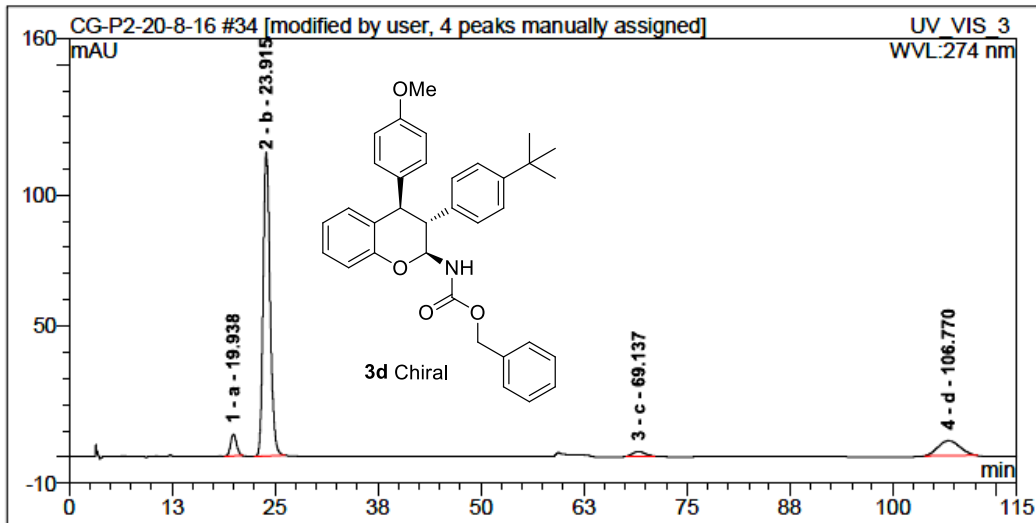

| No. | Peak Name | Ret.Time (detected)<br>min | Area<br>mAU*min | Rel.Area(ident.)<br>% | Height<br>mAU | Amount |
|-----|-----------|----------------------------|-----------------|-----------------------|---------------|--------|
| 1 a |           | 19.94                      | 6.943547        | 4.928667947           | 8.34682       | n.a.   |
| 2 b |           | 23.92                      | 113.2806        | 80.40881082           | 116.0163      | n.a.   |
| 3 c |           | 69.14                      | 3.10418         | 2.203408777           | 1.76834       | n.a.   |
| 4 d |           | 106.77                     | 17.552          | 12.45911245           | 5.717         | n.a.   |

CG-P2-94-RAC-IC

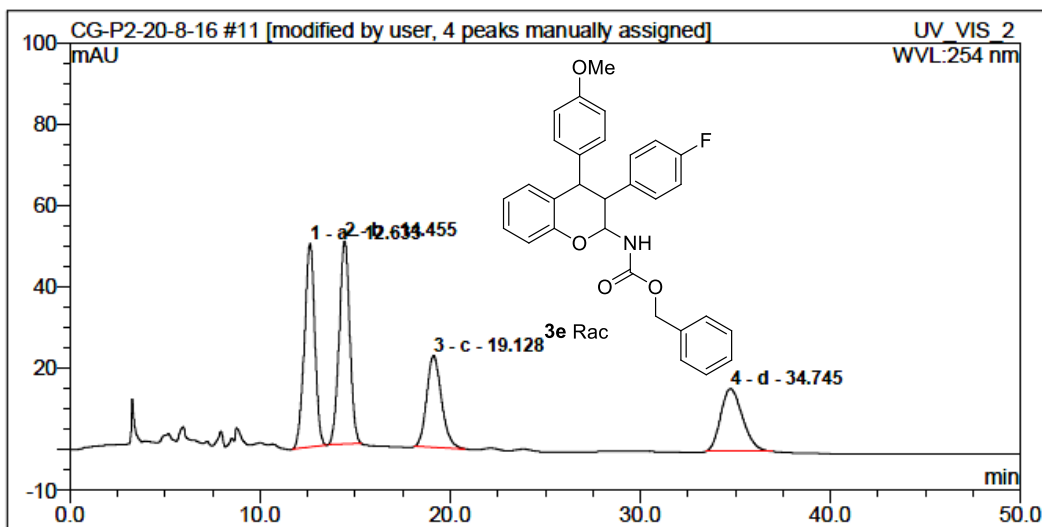

| No. | Peak Name | Ret.Time (detected)<br>min | Area<br>mAU*min | Rel.Area(ident.)<br>% | Height<br>mAU | Amount |
|-----|-----------|----------------------------|-----------------|-----------------------|---------------|--------|
| 1   | a         | 12.63                      | 31.77363        | 30.33795604           | 50.14325      | n.a.   |
| 2   | b         | 14.46                      | 32.11443        | 30.66336476           | 49.92436      | n.a.   |
| 3   | c         | 19.13                      | 20.40716        | 19.48507418           | 22.57763      | n.a.   |
| 4   | d         | 34.75                      | 20.437          | 19.51360502           | 15.382        | n.a.   |

CG-P2-94-CHI-IC

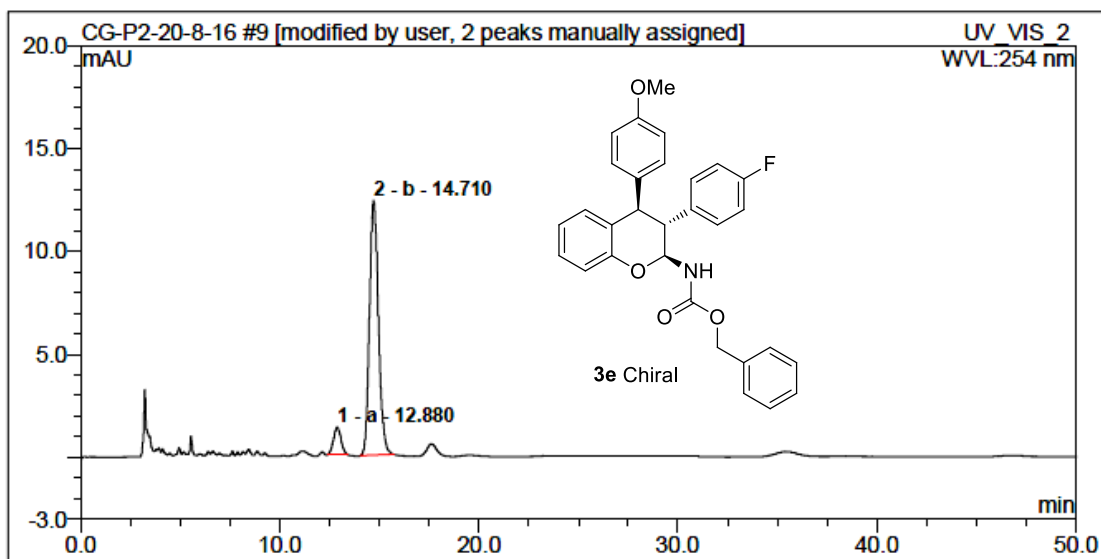

| No. | Peak Name | Ret.Time (detected)<br>min | Area<br>mAU*min | Rel.Area(ident.)<br>% | Height<br>mAU | Amount |
|-----|-----------|----------------------------|-----------------|-----------------------|---------------|--------|
| 1   | a         | 12.88                      | 0.564734        | 8.053995858           | 1.3117        | n.a.   |
| 2   | b         | 14.71                      | 6.447           | 91.94600414           | 12.379        | n.a.   |



P2-4-CI-RAC-IA

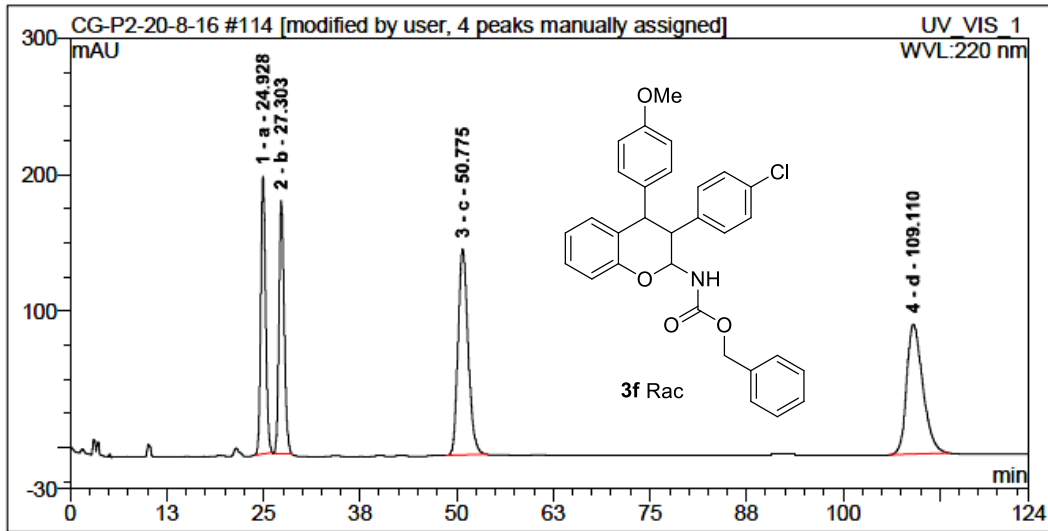

| No. | Peak Name | Ret.Time (detected)<br>min | Area<br>mAU*min | Rel.Area(ident.)<br>% | Height<br>mAU | Amount |
|-----|-----------|----------------------------|-----------------|-----------------------|---------------|--------|
| 1   | a         | 24.93                      | 148.0496        | 19.61442014           | 203.7602      | n.a.   |
| 2   | b         | 27.30                      | 146.6591        | 19.43020275           | 185.2691      | n.a.   |
| 3   | c         | 50.78                      | 229.0662        | 30.34793624           | 150.9963      | n.a.   |
| 4   | d         | 109.11                     | 231.025         | 30.60744086           | 95.175        | n.a.   |

P2-4-CI-CHI-IA

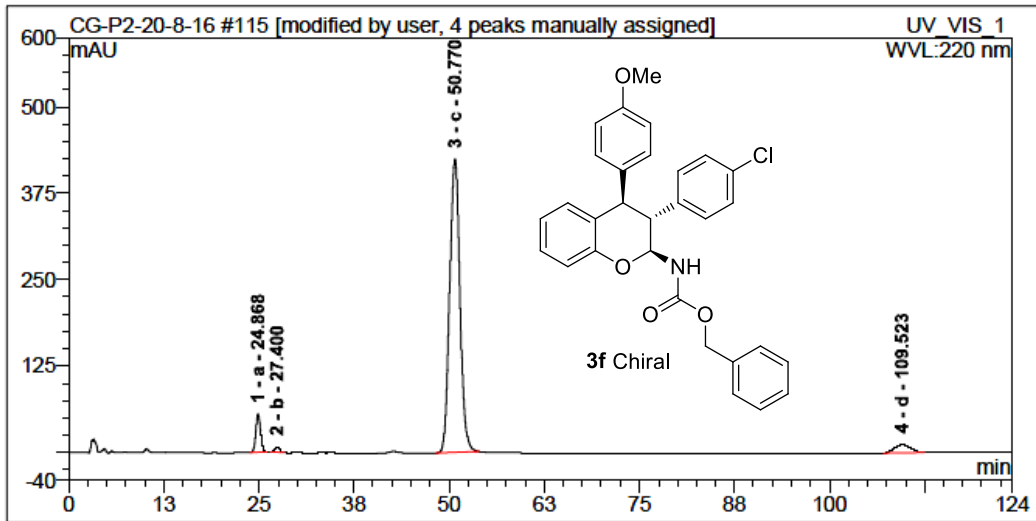

| No. | Peak Name | Ret.Time (detected)<br>min | Area<br>mAU*min | Rel.Area(ident.)<br>% | Height<br>mAU | Amount |
|-----|-----------|----------------------------|-----------------|-----------------------|---------------|--------|
| 1   | a         | 24.87                      | 40.42519        | 5.4598504             | 55.78375      | n.a.   |
| 2   | b         | 27.40                      | 6.344182        | 0.8568489824          | 8.22721       | n.a.   |
| 3   | c         | 50.77                      | 665.6114        | 89.89787616           | 424.6394      | n.a.   |
| 4   | d         | 109.52                     | 28.028          | 3.785424457           | 12.034        | n.a.   |

P2-4-Br-RAC-IA

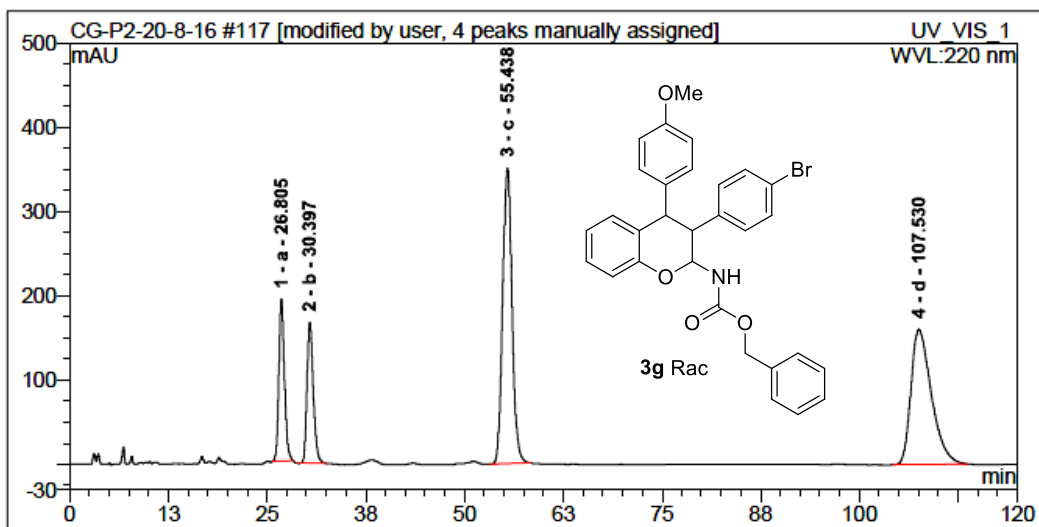

| No. | Peak Name | Ret.Time (detected)<br>min | Area<br>mAU*min | Rel.Area(ident.)<br>% | Height<br>mAU | Amount |
|-----|-----------|----------------------------|-----------------|-----------------------|---------------|--------|
| 1 a |           | 26.81                      | 156.5554        | 12.27670464           | 192.3728      | n.a.   |
| 2 b |           | 30.40                      | 154.0161        | 12.07758383           | 167.0487      | n.a.   |
| 3 c |           | 55.44                      | 484.1258        | 37.96400547           | 351.3359      | n.a.   |
| 4 d |           | 107.53                     | 480.526         | 37.68170605           | 160.531       | n.a.   |

P2-4-Br-CHI-IA

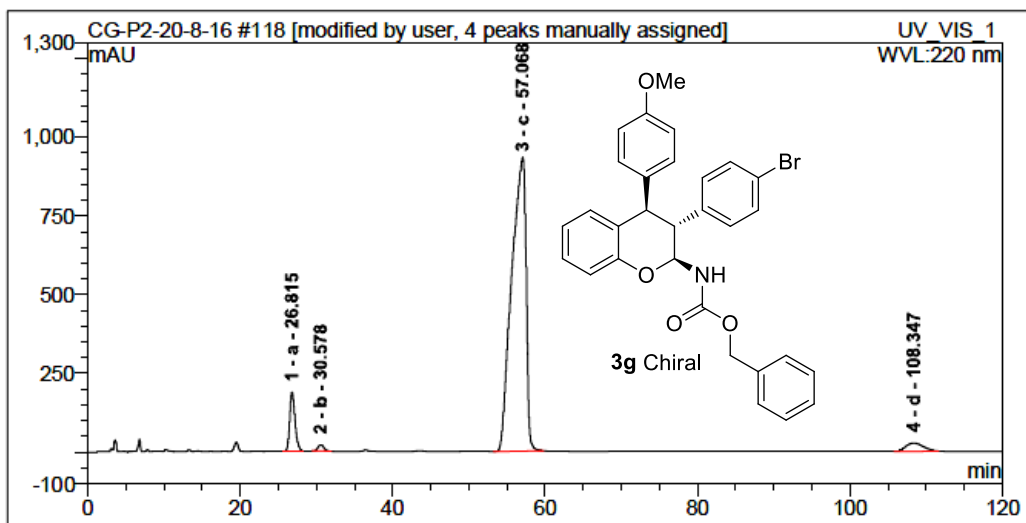

| No. | Peak Name | Ret.Time (detected)<br>min | Area<br>mAU*min | Rel.Area(ident.)<br>% | Height<br>mAU | Amount |
|-----|-----------|----------------------------|-----------------|-----------------------|---------------|--------|
| 1 a |           | 26.82                      | 151.9812        | 6.684382704           | 186.8681      | n.a.   |
| 2 b |           | 30.58                      | 18.65361        | 0.8204163376          | 19.74184      | n.a.   |
| 3 c |           | 57.07                      | 2032.319        | 89.38469344           | 932.6104      | n.a.   |
| 4 d |           | 108.35                     | 70.723          | 3.110507522           | 26.400        | n.a.   |

## CG-P2-116-RAC-IC

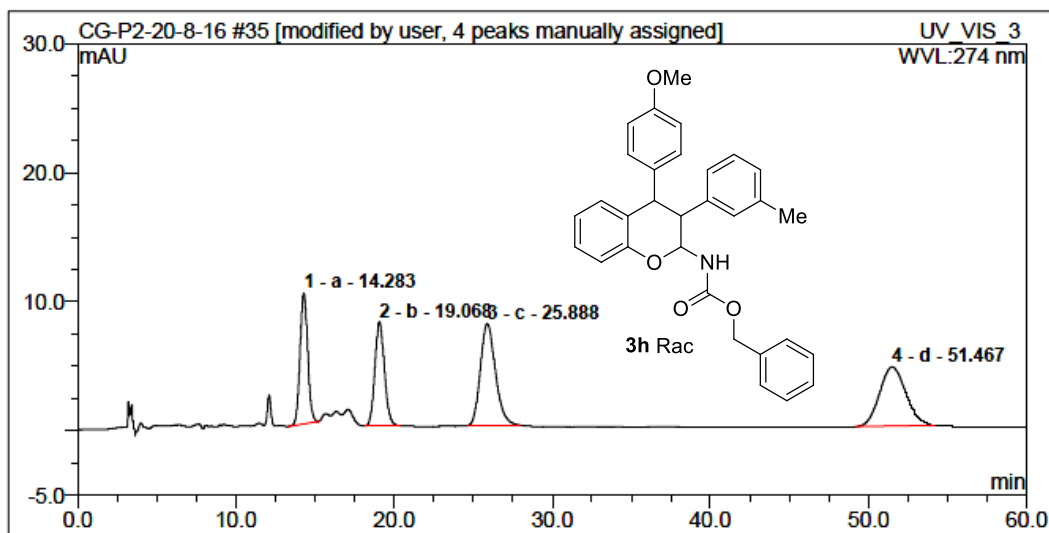

| No. | Peak Name | Ret. Time (detected)<br>min | Area<br>mAU*min | Rel. Area(ident.)<br>% | Height<br>mAU | Amount |
|-----|-----------|-----------------------------|-----------------|------------------------|---------------|--------|
| 1   | a         | 14.28                       | 5.702252        | 19.70840519            | 10.14883      | n.a.   |
| 2   | b         | 19.07                       | 5.664433        | 19.57769223            | 8.06497       | n.a.   |
| 3   | c         | 25.89                       | 8.745237        | 30.22571746            | 7.88011       | n.a.   |
| 4   | d         | 51.47                       | 8.821           | 30.48818512            | 4.568         | n.a.   |

## CG-P2-116-CHI-IC

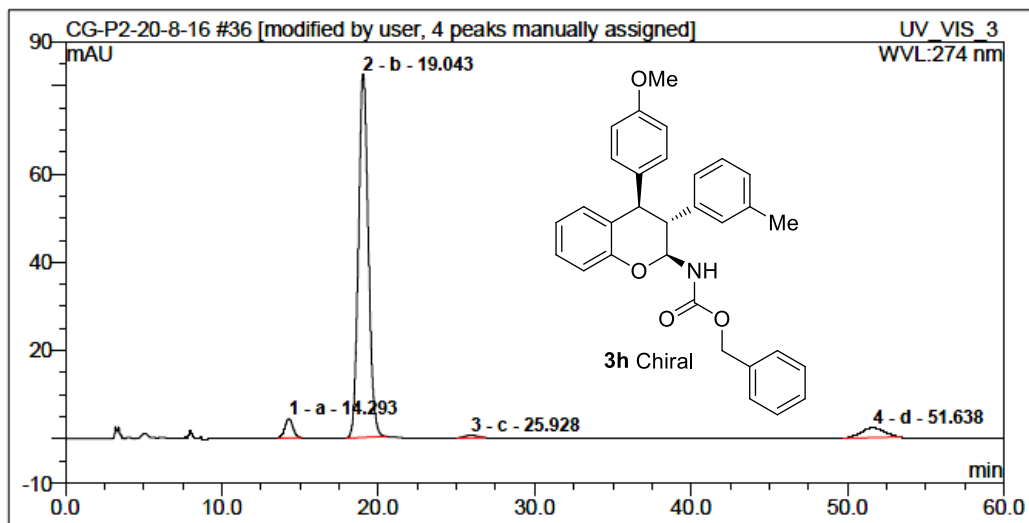

| No. | Peak Name | Ret. Time (detected)<br>min | Area<br>mAU*min | Rel. Area(ident.)<br>% | Height<br>mAU | Amount |
|-----|-----------|-----------------------------|-----------------|------------------------|---------------|--------|
| 1   | a         | 14.29                       | 2.581352        | 3.818377377            | 4.34313       | n.a.   |
| 2   | b         | 19.04                       | 60.56322        | 89.58610924            | 82.40843      | n.a.   |
| 3   | c         | 25.93                       | 0.524569        | 0.7759508608           | 0.57698       | n.a.   |
| 4   | d         | 51.64                       | 3.934           | 5.819562518            | 2.179         | n.a.   |

## CG-P2-3-CI-RAC-IA

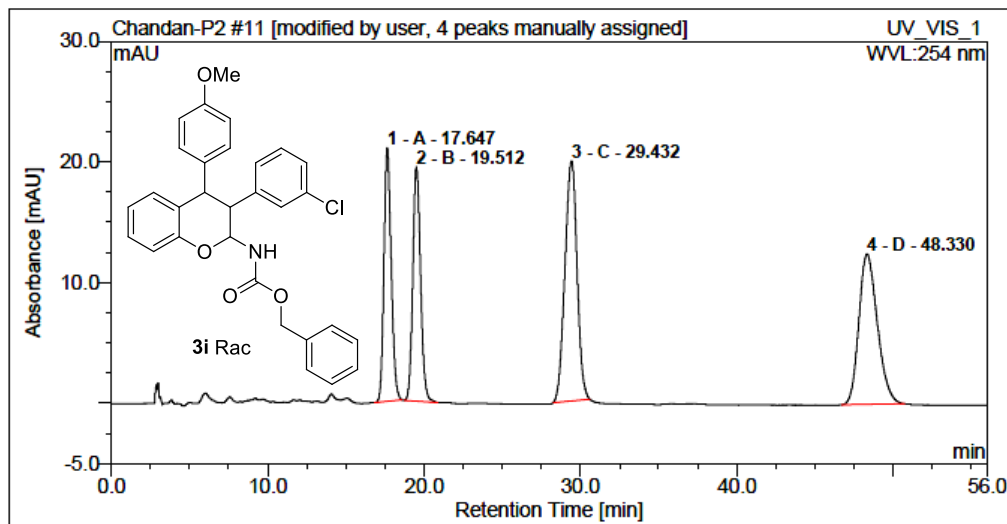

| No. | Peak Name | Ret.Time (detected)<br>min | Area<br>mAU*min | Rel.Area(ident.)<br>% | Height<br>mAU | Amount |
|-----|-----------|----------------------------|-----------------|-----------------------|---------------|--------|
| 1 A |           | 17.65                      | 11.29361        | 19.69576151           | 21.00427      | n.a.   |
| 2 B |           | 19.51                      | 11.12418        | 19.4002911            | 19.38132      | n.a.   |
| 3 C |           | 29.43                      | 17.84009        | 31.11266225           | 19.8574       | n.a.   |
| 4 D |           | 48.33                      | 17.082          | 29.79128514           | 12.451        | n.a.   |

## CG-P2-3-CI-CHI-IA

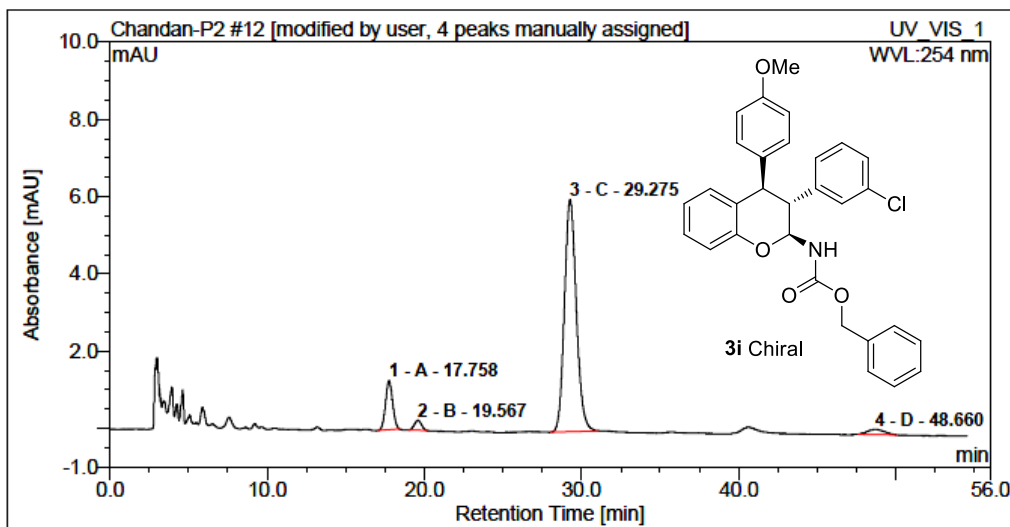

| No. | Peak Name | Ret.Time (detected)<br>min | Area<br>mAU*min | Rel.Area(ident.)<br>% | Height<br>mAU | Amount |
|-----|-----------|----------------------------|-----------------|-----------------------|---------------|--------|
| 1 A |           | 17.76                      | 0.666523        | 10.69907697           | 1.27349       | n.a.   |
| 2 B |           | 19.57                      | 0.131742        | 2.11473516            | 0.25702       | n.a.   |
| 3 C |           | 29.28                      | 5.265687        | 84.52516869           | 6.00873       | n.a.   |
| 4 D |           | 48.66                      | 0.166           | 2.661019174           | 0.135         | n.a.   |

CG-P2-120-RAC-IA

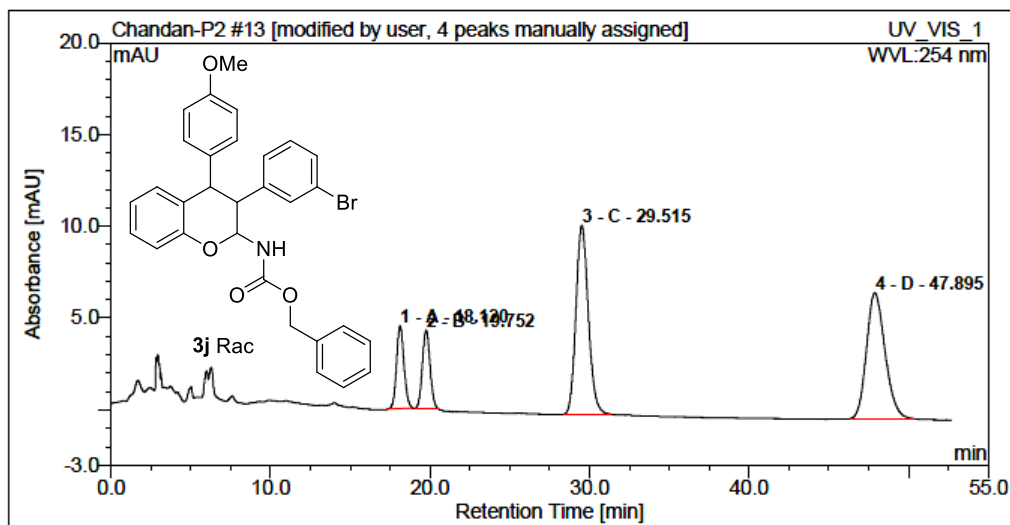

| No. | Peak Name | Ret.Time (detected) min | Area mAU*min | Rel.Area(ident.) % | Height mAU | Amount |
|-----|-----------|-------------------------|--------------|--------------------|------------|--------|
| 1 A |           | 18.12                   | 2.433539     | 10.44255962        | 4.49546    | n.a.   |
| 2 B |           | 19.75                   | 2.375028     | 10.19148148        | 4.25907    | n.a.   |
| 3 C |           | 29.52                   | 9.260104     | 39.73603186        | 10.29364   | n.a.   |
| 4 D |           | 47.90                   | 9.235        | 39.62992704        | 6.850      | n.a.   |

CG-P2-120-CHI-IA

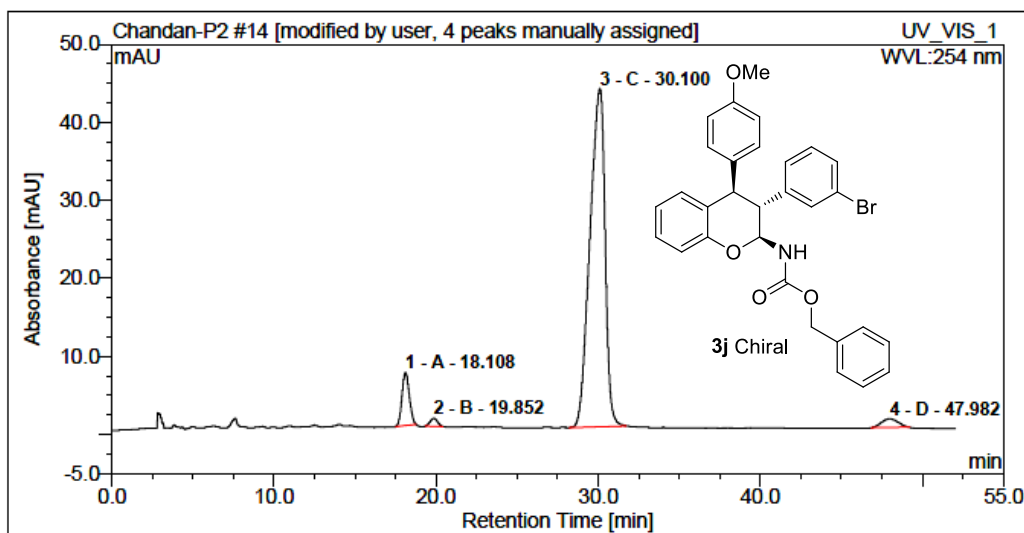

| No. | Peak Name | Ret.Time (detected) min | Area mAU*min | Rel.Area(ident.) % | Height mAU | Amount |
|-----|-----------|-------------------------|--------------|--------------------|------------|--------|
| 1 A |           | 18.11                   | 3.525821     | 6.776238368        | 6.78591    | n.a.   |
| 2 B |           | 19.85                   | 0.531681     | 1.021832404        | 1.03218    | n.a.   |
| 3 C |           | 30.10                   | 46.64533     | 89.64718009        | 43.25883   | n.a.   |
| 4 D |           | 47.98                   | 1.329        | 2.554749136        | 1.115      | n.a.   |

P2-115-RAC-IA

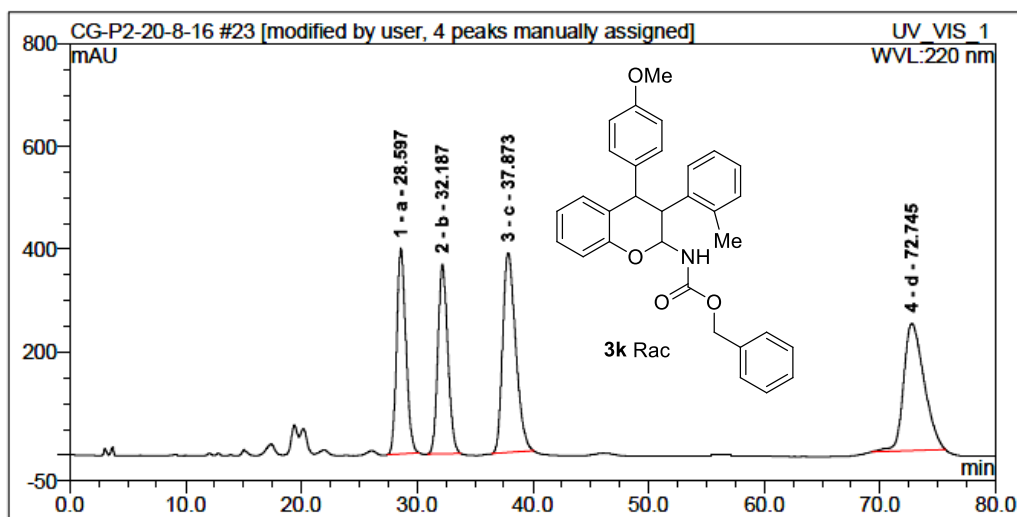

| No. | Peak Name | Ret.Time (detected)<br>min | Area<br>mAU*min | Rel.Area(ident.)<br>% | Height<br>mAU | Amount |
|-----|-----------|----------------------------|-----------------|-----------------------|---------------|--------|
| 1   | a         | 28.60                      | 367.9948        | 21.02953021           | 399.8376      | n.a.   |
| 2   | b         | 32.19                      | 367.2679        | 20.98799162           | 369.2401      | n.a.   |
| 3   | c         | 37.87                      | 507.5938        | 29.0070946            | 388.9667      | n.a.   |
| 4   | d         | 72.75                      | 507.039         | 28.97538357           | 247.474       | n.a.   |

P2-115-CHI-IA

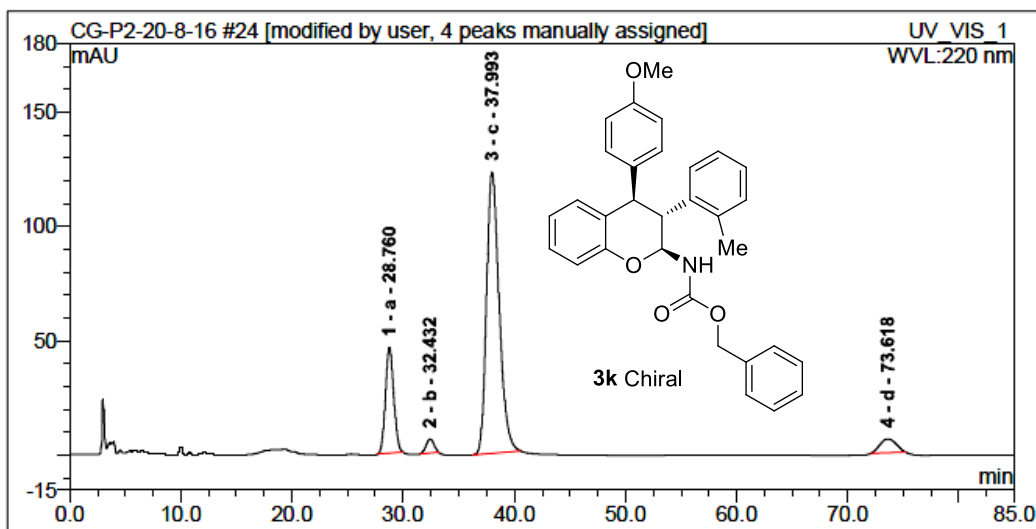

| No. | Peak Name | Ret.Time (detected)<br>min | Area<br>mAU*min | Rel.Area(ident.)<br>% | Height<br>mAU | Amount |
|-----|-----------|----------------------------|-----------------|-----------------------|---------------|--------|
| 1   | a         | 28.76                      | 39.84976        | 18.38879231           | 46.21871      | n.a.   |
| 2   | b         | 32.43                      | 4.939181        | 2.279200452           | 6.01822       | n.a.   |
| 3   | c         | 37.99                      | 161.7102        | 74.62166627           | 122.923       | n.a.   |
| 4   | d         | 73.62                      | 10.208          | 4.710340967           | 6.092         | n.a.   |

P2-125-RAC-IA

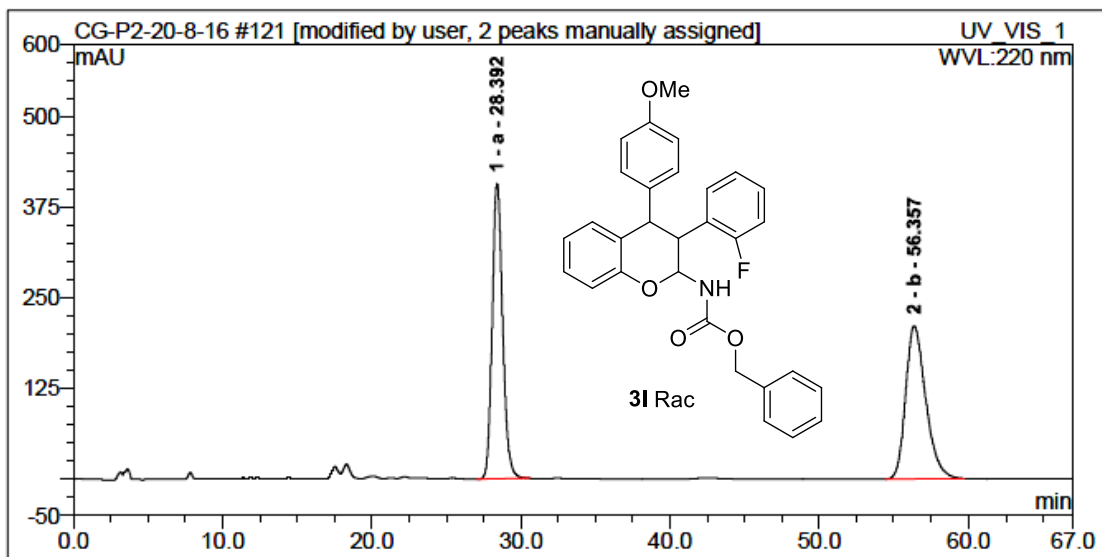

| No. | Peak Name | Ret.Time (detected)<br>min | Area<br>mAU*min | Rel.Area(ident.)<br>% | Height<br>mAU | Amount |
|-----|-----------|----------------------------|-----------------|-----------------------|---------------|--------|
| 1 a |           | 28.39                      | 330.5729        | 50.09363685           | 407.1227      | n.a.   |
| 2 b |           | 56.36                      | 329.337         | 49.90636315           | 210.862       | n.a.   |

P2-125-CHI-IA

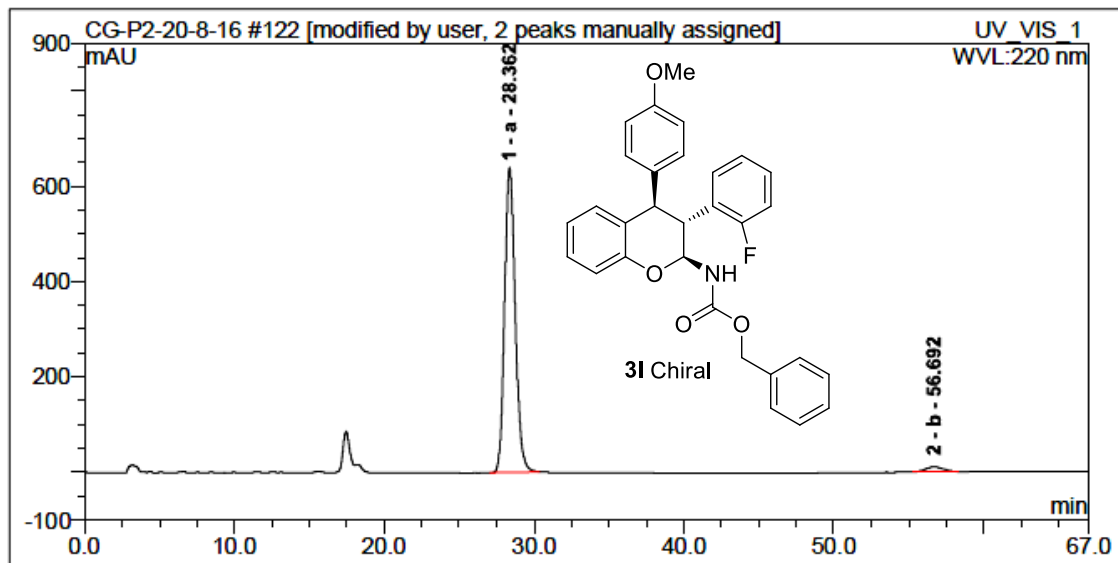

| No. | Peak Name | Ret.Time (detected)<br>min | Area<br>mAU*min | Rel.Area(ident.)<br>% | Height<br>mAU | Amount |
|-----|-----------|----------------------------|-----------------|-----------------------|---------------|--------|
| 1 a |           | 28.36                      | 525.4879        | 97.27833622           | 639.5804      | n.a.   |
| 2 b |           | 56.69                      | 14.702          | 2.721663784           | 10.320        | n.a.   |

P2-123-RAC-IA

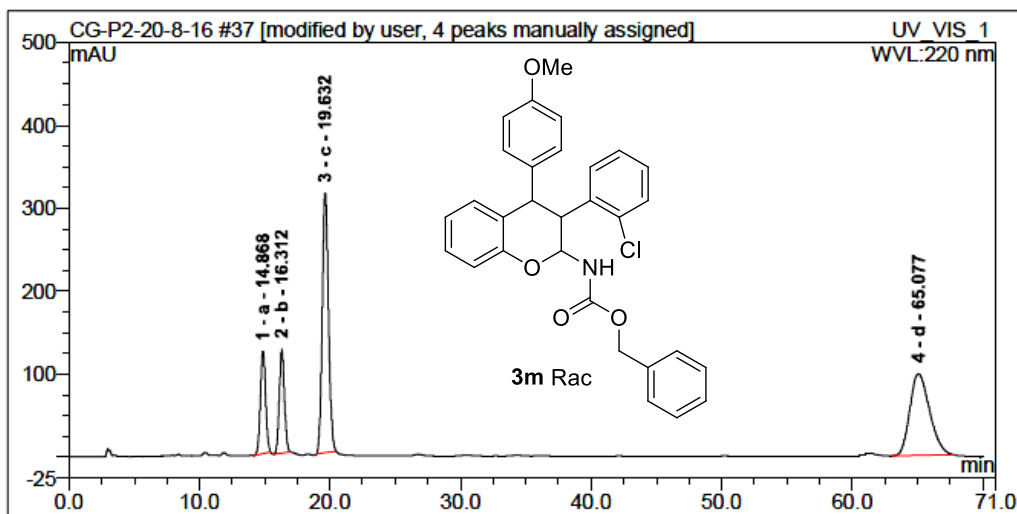

| No. | Peak Name | Ret.Time (detected)<br>min | Area<br>mAU*min | Rel.Area(ident.)<br>% | Height<br>mAU | Amount |
|-----|-----------|----------------------------|-----------------|-----------------------|---------------|--------|
| 1 a |           | 14.87                      | 57.11314        | 12.37340689           | 122.9452      | n.a.   |
| 2 b |           | 16.31                      | 57.23118        | 12.39898069           | 125.5152      | n.a.   |
| 3 c |           | 19.63                      | 173.2538        | 37.53497361           | 312.6897      | n.a.   |
| 4 d |           | 65.08                      | 173.982         | 37.69263881           | 98.800        | n.a.   |

P2-123-CHI-IA

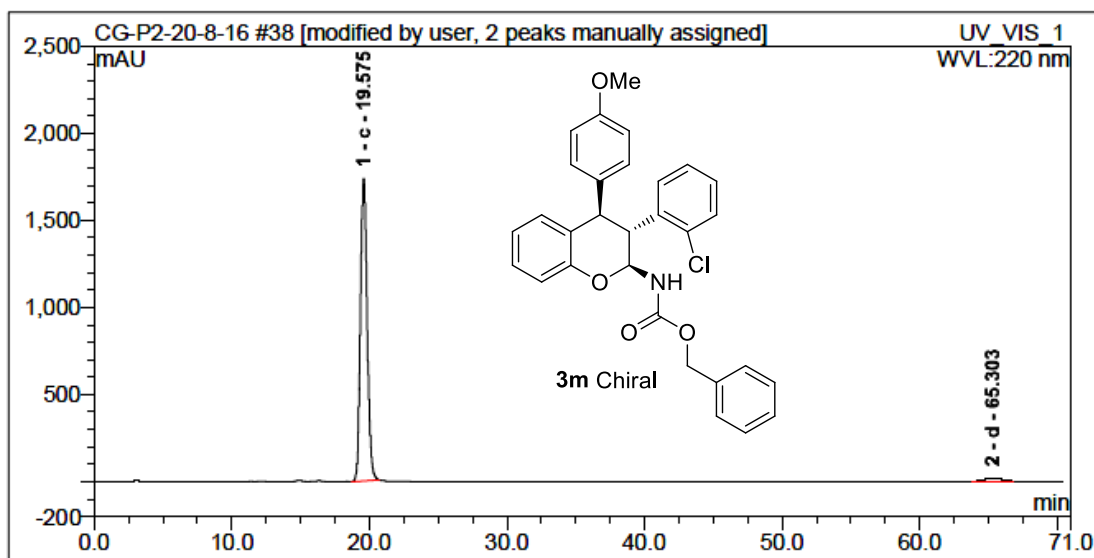

| No. | Peak Name | Ret.Time (detected)<br>min | Area<br>mAU*min | Rel.Area(ident.)<br>% | Height<br>mAU | Amount |
|-----|-----------|----------------------------|-----------------|-----------------------|---------------|--------|
| 1 c |           | 19.58                      | 981.9319        | 97.10596771           | 1735.308      | n.a.   |
| 2 d |           | 65.30                      | 29.264          | 2.894032292           | 19.107        | n.a.   |



P2-124-RAC-IB-10%

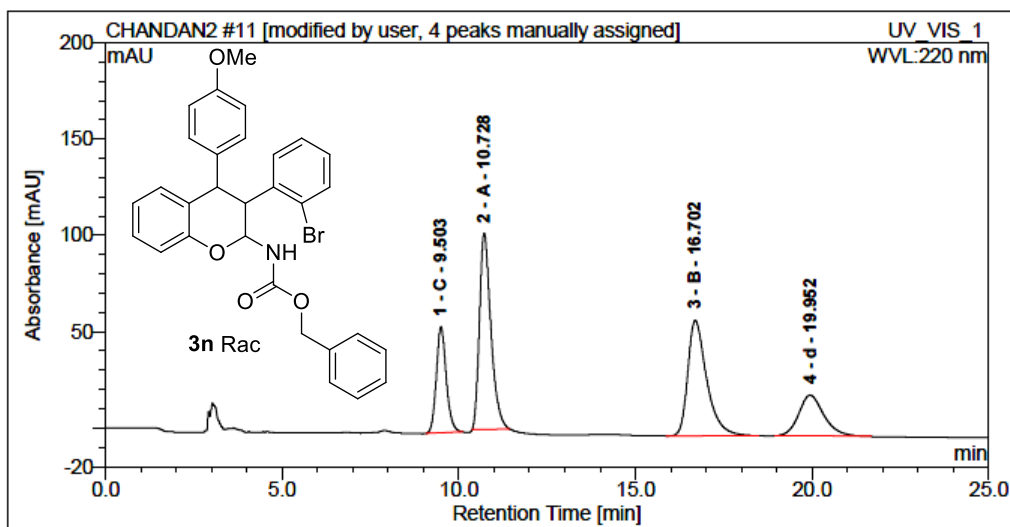

| No. | Peak Name | Ret.Time (detected) min | Area mAU*min | Rel.Area(ident.) % | Height mAU | Amount |
|-----|-----------|-------------------------|--------------|--------------------|------------|--------|
| 1   | C         | 9.50                    | 17.90306     | 16.14172743        | 55.08396   | n.a.   |
| 2   | A         | 10.73                   | 38.10233     | 34.35376126        | 101.7302   | n.a.   |
| 3   | B         | 16.70                   | 37.27505     | 33.60787627        | 60.00693   | n.a.   |
| 4   | d         | 19.95                   | 17.631       | 15.89663504        | 21.222     | n.a.   |

P2-124-CHI-IB-10%

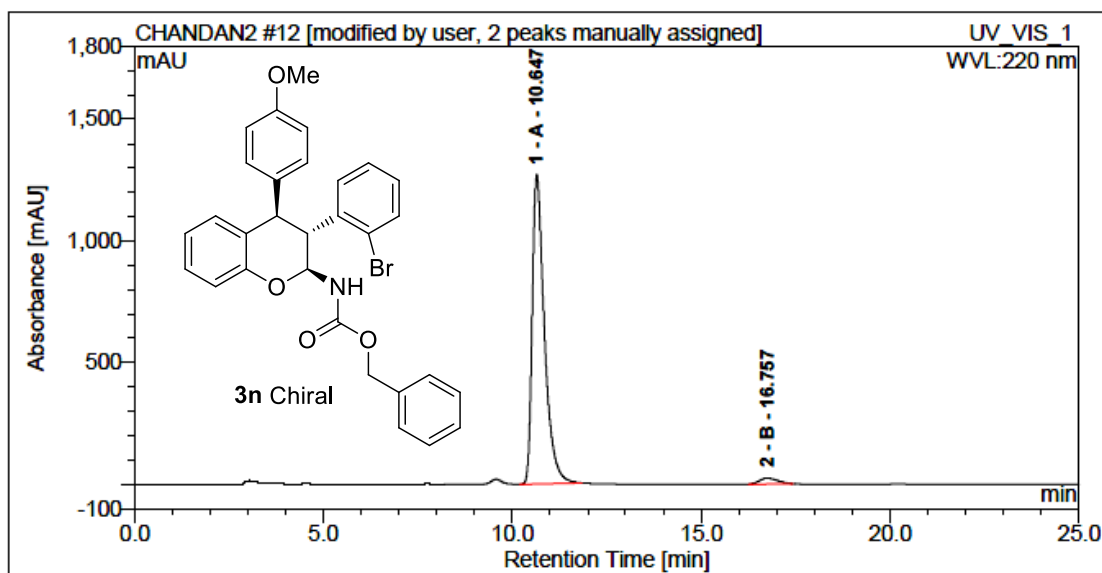

| No. | Peak Name | Ret.Time (detected) min | Area mAU*min | Rel.Area(ident.) % | Height mAU | Amount |
|-----|-----------|-------------------------|--------------|--------------------|------------|--------|
| 1   | A         | 10.65                   | 474.1742     | 97.39590396        | 1271.7     | n.a.   |
| 2   | B         | 16.76                   | 12.678       | 2.604096036        | 23.287     | n.a.   |

P2-117-RAC-IC-220nm

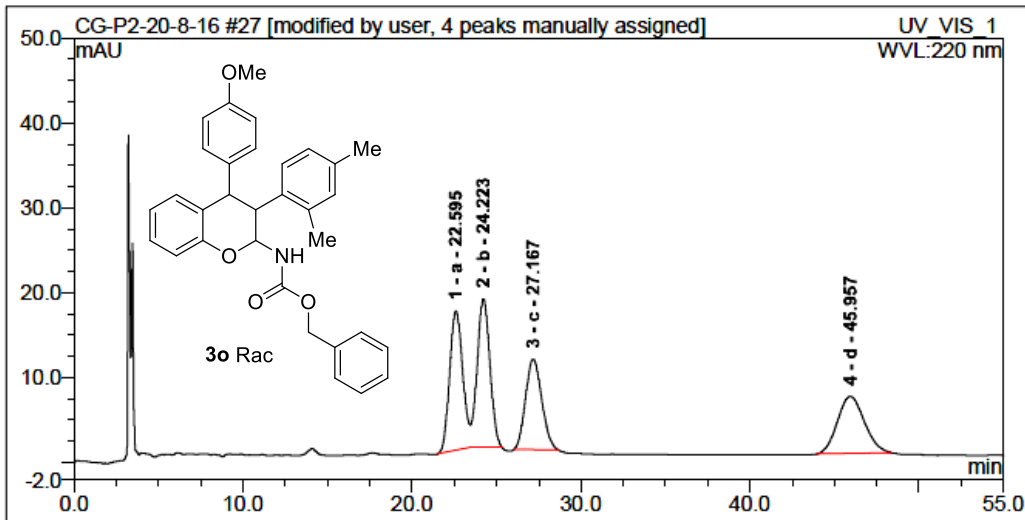

| No. | Peak Name | Ret.Time (detected)<br>min | Area<br>mAU*min | Rel.Area(ident.)<br>% | Height<br>mAU | Amount |
|-----|-----------|----------------------------|-----------------|-----------------------|---------------|--------|
| 1 a |           | 22.60                      | 14.78724        | 27.27064381           | 16.43579      | n.a.   |
| 2 b |           | 24.22                      | 15.15087        | 27.94123432           | 17.47955      | n.a.   |
| 3 c |           | 27.17                      | 11.90276        | 21.95107653           | 10.66413      | n.a.   |
| 4 d |           | 45.96                      | 12.383          | 22.83704534           | 6.702         | n.a.   |

P2-117-CHI-IC-220nm

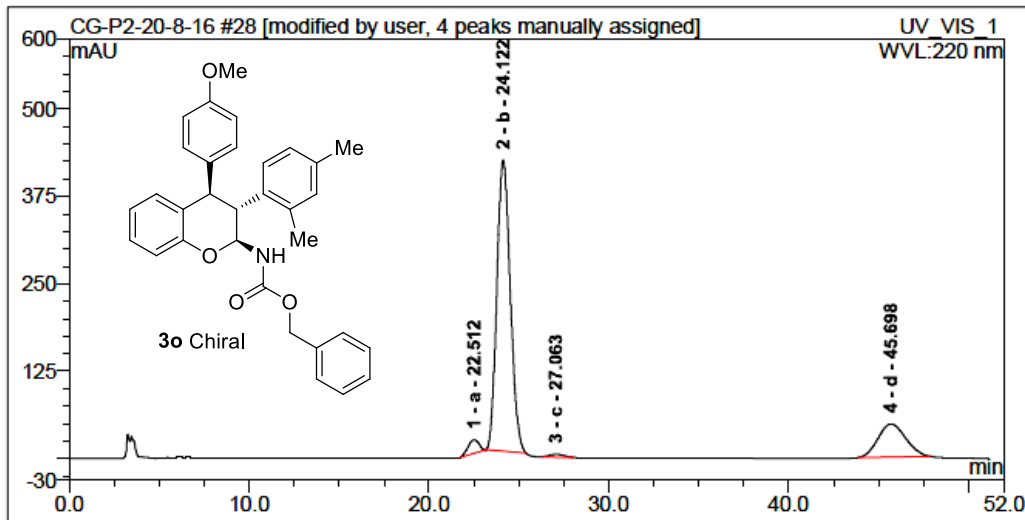

| No. | Peak Name | Ret.Time (detected)<br>min | Area<br>mAU*min | Rel.Area(ident.)<br>% | Height<br>mAU | Amount |
|-----|-----------|----------------------------|-----------------|-----------------------|---------------|--------|
| 1 a |           | 22.51                      | 13.4591         | 2.925383688           | 19.21198      | n.a.   |
| 2 b |           | 24.12                      | 358.7869        | 77.98362152           | 415.7659      | n.a.   |
| 3 c |           | 27.06                      | 3.834732        | 0.8334927585          | 4.1381        | n.a.   |
| 4 d |           | 45.70                      | 83.999          | 18.25750203           | 47.135        | n.a.   |

P2-92-RAC-IA-220nm

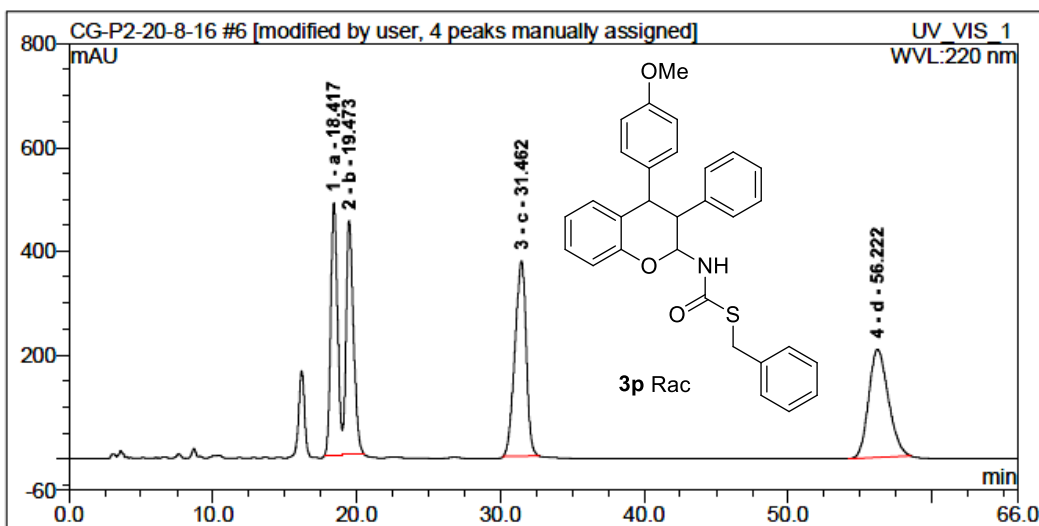

| No. | Peak Name | Ret.Time (detected)<br>min | Area<br>mAU*min | Rel.Area(ident.)<br>% | Height<br>mAU | Amount |
|-----|-----------|----------------------------|-----------------|-----------------------|---------------|--------|
| 1 a |           | 18.42                      | 263.8636        | 21.88590033           | 486.0072      | n.a.   |
| 2 b |           | 19.47                      | 267.3652        | 22.17633327           | 450.1063      | n.a.   |
| 3 c |           | 31.46                      | 343.6043        | 28.49991428           | 376.9113      | n.a.   |
| 4 d |           | 56.22                      | 330.800         | 27.43785212           | 208.059       | n.a.   |

CG-P2-92-CHI-IA-220nm

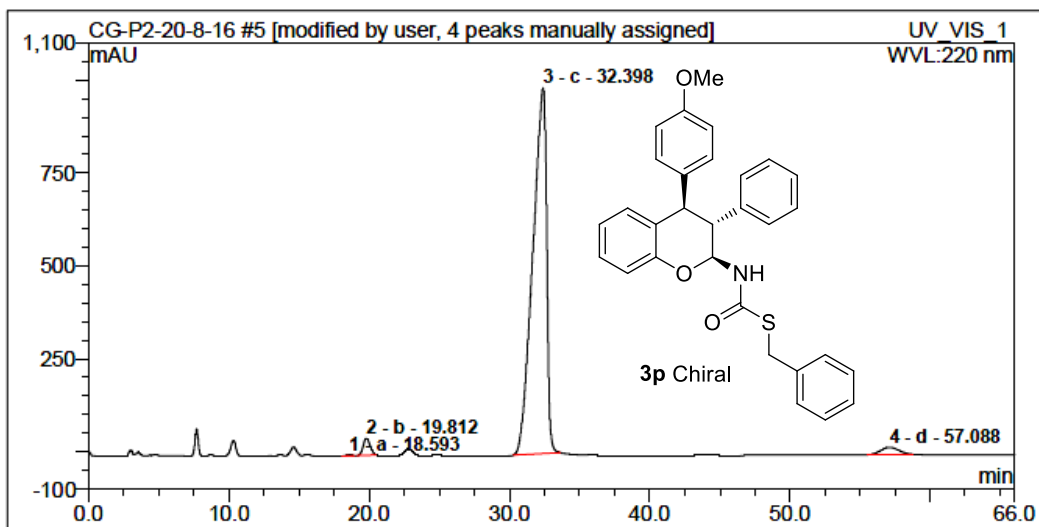

| No. | Peak Name | Ret.Time (detected)<br>min | Area<br>mAU*min | Rel.Area(ident.)<br>% | Height<br>mAU | Amount |
|-----|-----------|----------------------------|-----------------|-----------------------|---------------|--------|
| 1 a |           | 18.59                      | 1.280049        | 0.1086115573          | 2.88478       | n.a.   |
| 2 b |           | 19.81                      | 25.98498        | 2.204813764           | 45.64207      | n.a.   |
| 3 c |           | 32.40                      | 1122.805        | 95.26949738           | 983.7086      | n.a.   |
| 4 d |           | 57.09                      | 28.487          | 2.417077297           | 19.020        | n.a.   |

## CG-P2-105-RAC-IA

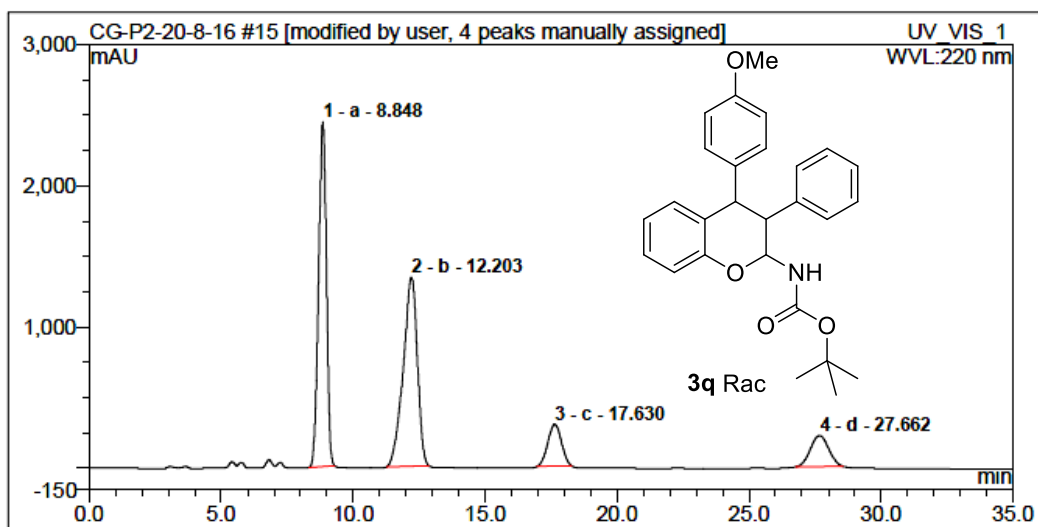

| No. | Peak Name | Ret. Time (detected) min | Area mAU*min | Rel. Area(ident.) % | Height mAU | Amount |
|-----|-----------|--------------------------|--------------|---------------------|------------|--------|
| 1   | a         | 8.85                     | 837.0718     | 41.45018565         | 2439.305   | n.a.   |
| 2   | b         | 12.20                    | 829.8984     | 41.09497274         | 1336.618   | n.a.   |
| 3   | c         | 17.63                    | 176.5708     | 8.74344643          | 295.6571   | n.a.   |
| 4   | d         | 27.66                    | 175.924      | 8.711395187         | 219.514    | n.a.   |

## CG-P2-105-CHI-IA

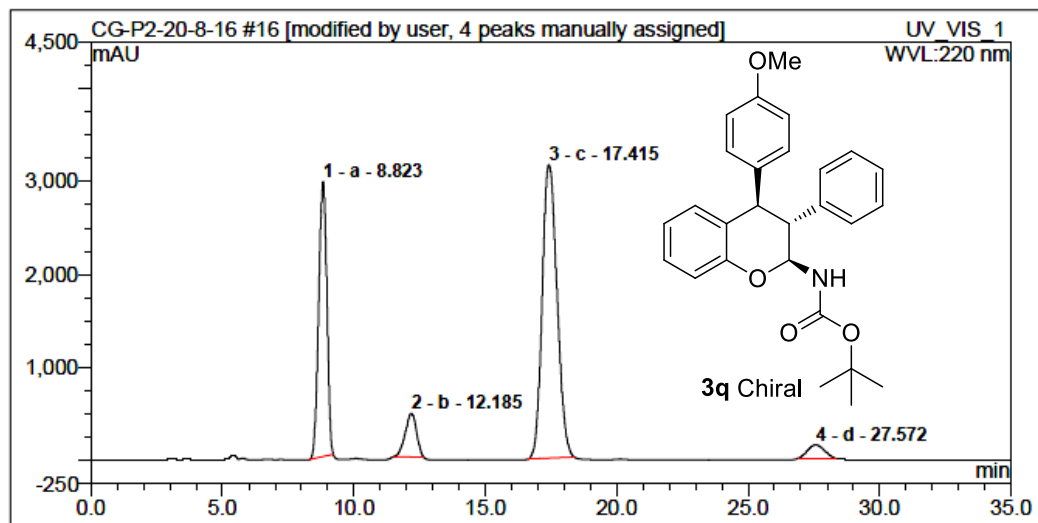

| No. | Peak Name | Ret. Time (detected) min | Area mAU*min | Rel. Area(ident.) % | Height mAU | Amount |
|-----|-----------|--------------------------|--------------|---------------------|------------|--------|
| 1   | a         | 8.82                     | 1064.605     | 30.70509015         | 2959.643   | n.a.   |
| 2   | b         | 12.19                    | 232.3893     | 6.702518659         | 467.9652   | n.a.   |
| 3   | c         | 17.42                    | 2063.344     | 59.5104979          | 3156.738   | n.a.   |
| 4   | d         | 27.57                    | 106.855      | 3.081893293         | 144.328    | n.a.   |

P2-104-RAC-IC

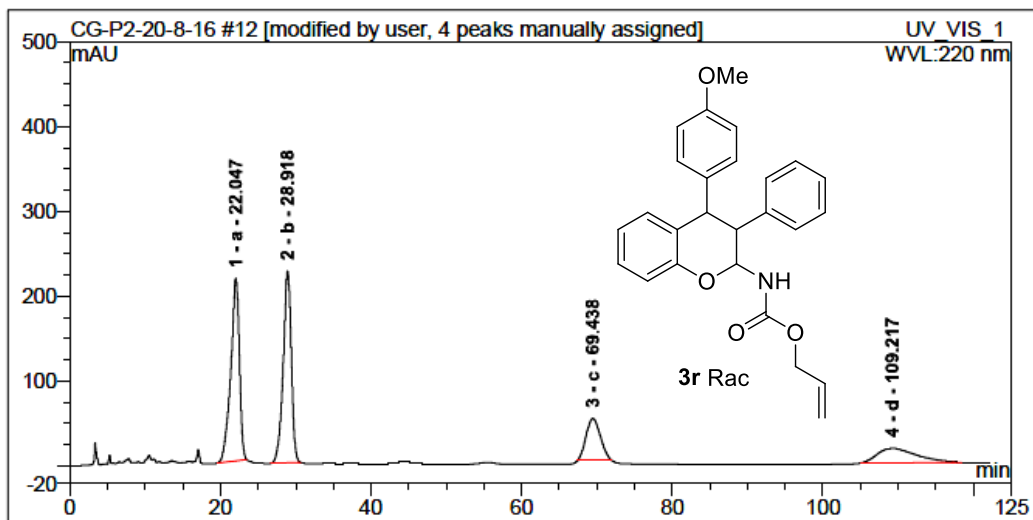

| No. | Peak Name | Ret.Time (detected)<br>min | Area<br>mAU*min | Rel.Area(ident.)<br>% | Height<br>mAU | Amount |
|-----|-----------|----------------------------|-----------------|-----------------------|---------------|--------|
| 1 a |           | 22.05                      | 285.3055        | 36.73892854           | 215.1022      | n.a.   |
| 2 b |           | 28.92                      | 282.4755        | 36.3745154            | 226.0451      | n.a.   |
| 3 c |           | 69.44                      | 107.4398        | 13.83508308           | 48.9813       | n.a.   |
| 4 d |           | 109.22                     | 101.355         | 13.05147297           | 16.990        | n.a.   |

P2-104-CHI-IC

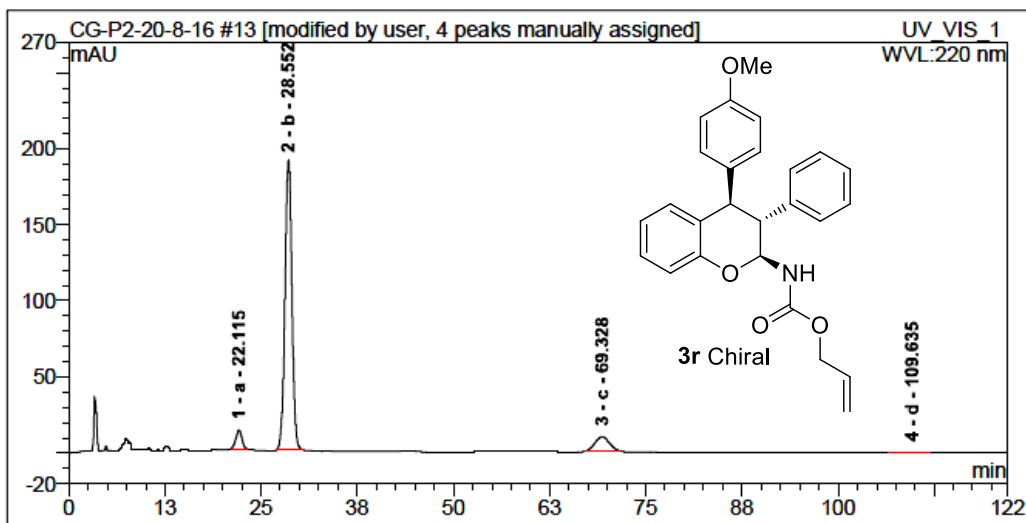

| No. | Peak Name | Ret.Time (detected)<br>min | Area<br>mAU*min | Rel.Area(ident.)<br>% | Height<br>mAU | Amount |
|-----|-----------|----------------------------|-----------------|-----------------------|---------------|--------|
| 1 a |           | 22.12                      | 11.25596        | 4.911304057           | 12.44959      | n.a.   |
| 2 b |           | 28.55                      | 197.6632        | 86.24622426           | 190.6015      | n.a.   |
| 3 c |           | 69.33                      | 19.66433        | 8.580121857           | 9.21862       | n.a.   |
| 4 d |           | 109.64                     | 0.601           | 0.2623498287          | 0.228         | n.a.   |

CG-P2-91-RAC-IC

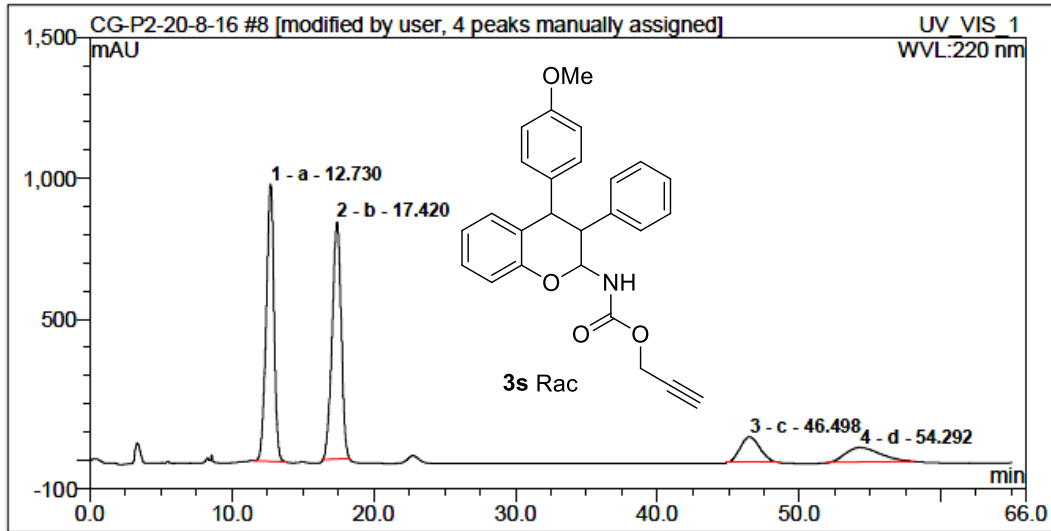

| No. | Peak Name | Ret.Time (detected)<br>min | Area<br>mAU*min | Rel.Area(ident.)<br>% | Height<br>mAU | Amount |
|-----|-----------|----------------------------|-----------------|-----------------------|---------------|--------|
| 1   | a         | 12.73                      | 625.5126        | 40.43267097           | 984.0171      | n.a.   |
| 2   | b         | 17.42                      | 622.9537        | 40.26726806           | 840.0671      | n.a.   |
| 3   | c         | 46.50                      | 149.8669        | 9.687285938           | 91.30396      | n.a.   |
| 4   | d         | 54.29                      | 148.714         | 9.612775029           | 51.740        | n.a.   |

CG-P2-91-CHI-IC

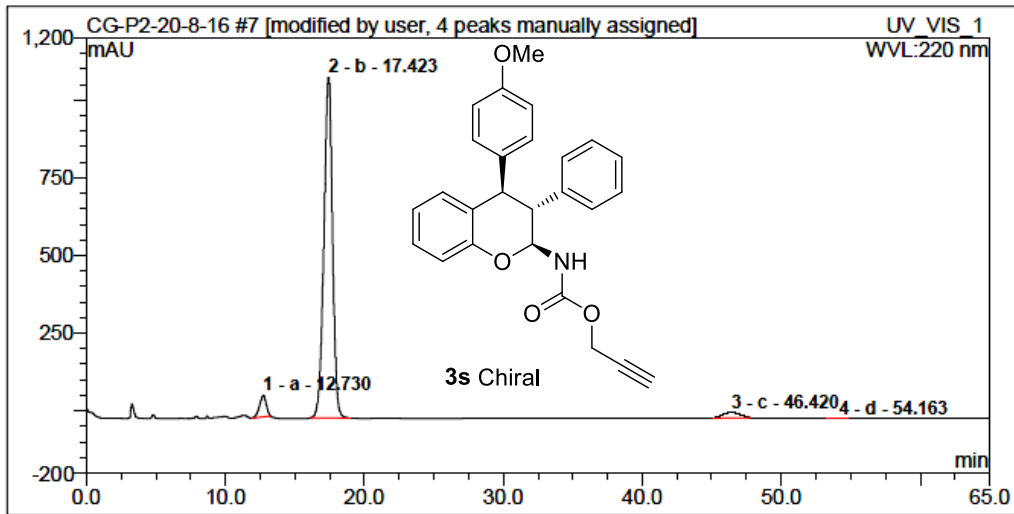

| No. | Peak Name | Ret.Time (detected)<br>min | Area<br>mAU*min | Rel.Area(ident.)<br>% | Height<br>mAU | Amount |
|-----|-----------|----------------------------|-----------------|-----------------------|---------------|--------|
| 1   | a         | 12.73                      | 38.41023        | 4.502455275           | 68.77119      | n.a.   |
| 2   | b         | 17.42                      | 787.8372        | 92.35043288           | 1096.236      | n.a.   |
| 3   | c         | 46.42                      | 26.7598         | 3.136789625           | 18.17993      | n.a.   |
| 4   | d         | 54.16                      | 0.088           | 0.01032221854         | 0.107         | n.a.   |

P2-128-RAC-IA

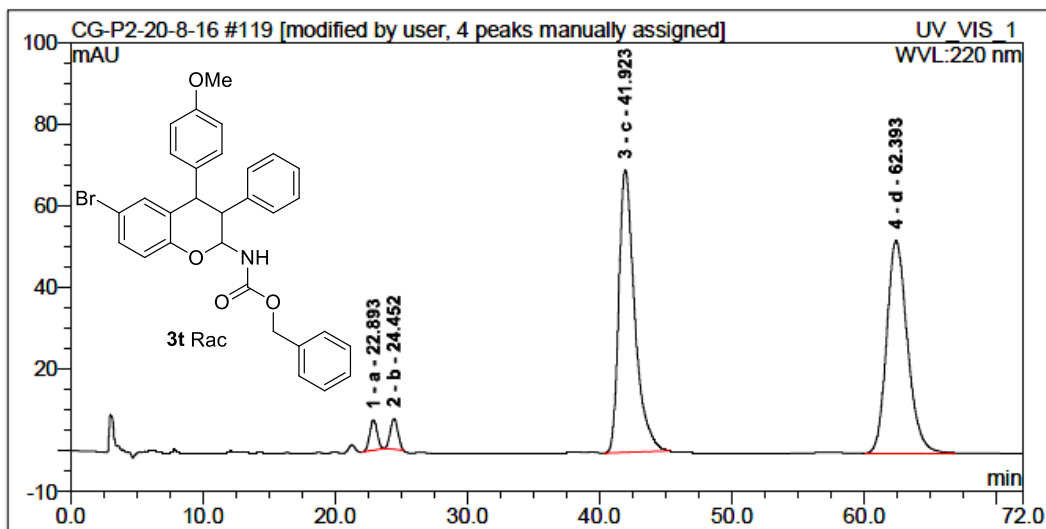

| No. | Peak Name | Ret.Time (detected)<br>min | Area<br>mAU*min | Rel.Area(ident.)<br>% | Height<br>mAU | Amount |
|-----|-----------|----------------------------|-----------------|-----------------------|---------------|--------|
| 1   | a         | 22.89                      | 4.883249        | 2.432611102           | 7.44096       | n.a.   |
| 2   | b         | 24.45                      | 4.986246        | 2.483919357           | 7.54736       | n.a.   |
| 3   | c         | 41.92                      | 96.11367        | 47.8794303            | 69.28723      | n.a.   |
| 4   | d         | 62.39                      | 94.758          | 47.20403924           | 52.121        | n.a.   |

P2-128-CHI-IA

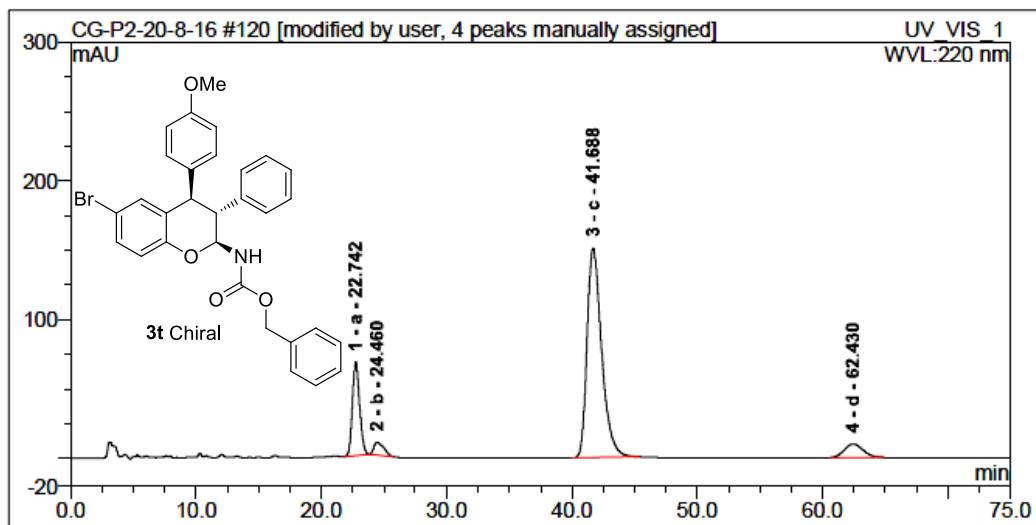

| No. | Peak Name | Ret.Time (detected)<br>min | Area<br>mAU*min | Rel.Area(ident.)<br>% | Height<br>mAU | Amount |
|-----|-----------|----------------------------|-----------------|-----------------------|---------------|--------|
| 1   | a         | 22.74                      | 45.16302        | 16.43523008           | 67.54441      | n.a.   |
| 2   | b         | 24.46                      | 8.380591        | 3.049772399           | 9.21115       | n.a.   |
| 3   | c         | 41.69                      | 204.2788        | 74.33890436           | 151.3428      | n.a.   |
| 4   | d         | 62.43                      | 16.972          | 6.17609316            | 9.803         | n.a.   |

P2-131-RAC4-IA

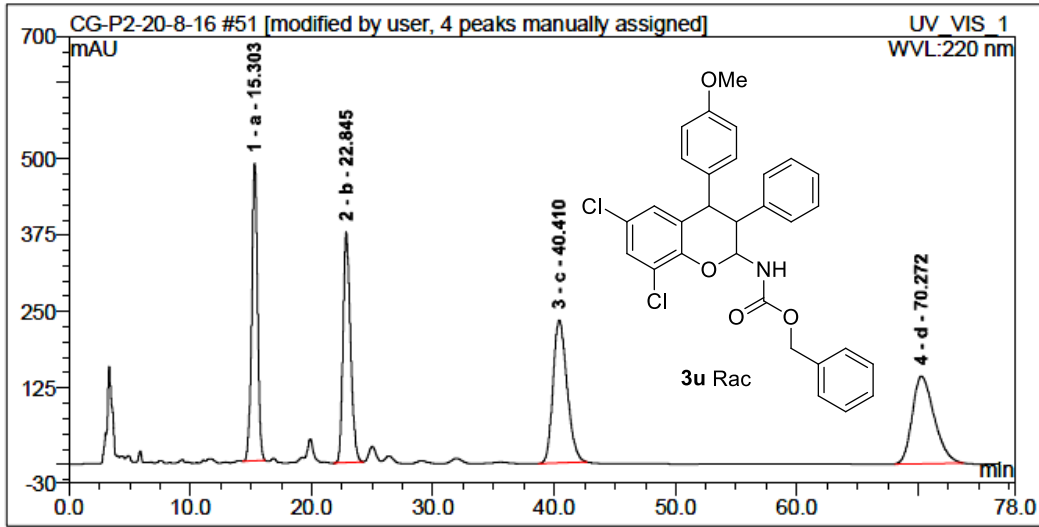

| No. | Peak Name | Ret.Time (detected)<br>min | Area<br>mAU*min | Rel.Area(ident.)<br>% | Height<br>mAU | Amount |
|-----|-----------|----------------------------|-----------------|-----------------------|---------------|--------|
| 1 a |           | 15.30                      | 268.9275        | 23.34876201           | 486.8136      | n.a.   |
| 2 b |           | 22.85                      | 270.213         | 23.46037002           | 377.3908      | n.a.   |
| 3 c |           | 40.41                      | 313.8436        | 27.2484555            | 233.8065      | n.a.   |
| 4 d |           | 70.27                      | 298.801         | 25.94241248           | 142.760       | n.a.   |

P2-131-CHI-IA

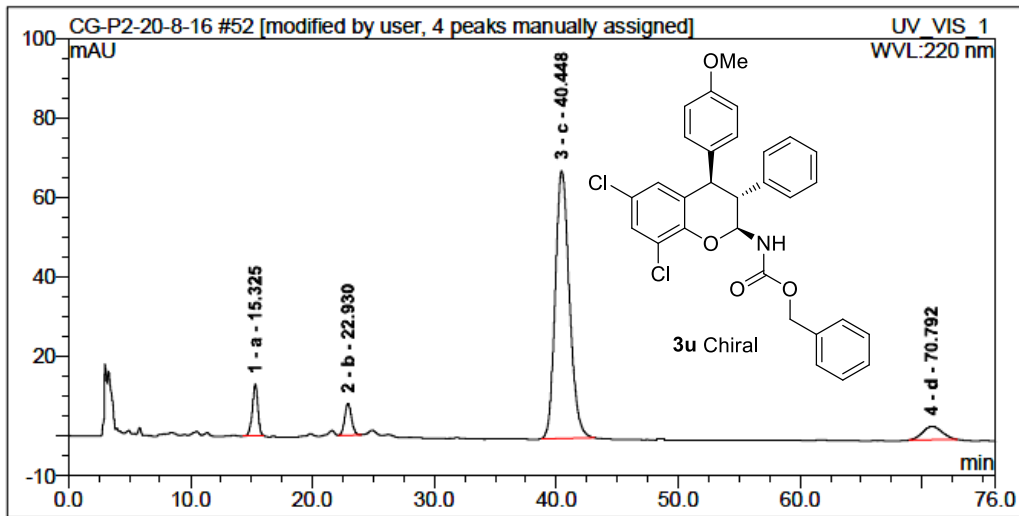

| No. | Peak Name | Ret.Time (detected)<br>min | Area<br>mAU*min | Rel.Area(ident.)<br>% | Height<br>mAU | Amount |
|-----|-----------|----------------------------|-----------------|-----------------------|---------------|--------|
| 1 a |           | 15.33                      | 6.925702        | 6.369125655           | 13.06066      | n.a.   |
| 2 b |           | 22.93                      | 5.176035        | 4.760069058           | 7.97671       | n.a.   |
| 3 c |           | 40.45                      | 90.45156        | 83.18252279           | 67.41469      | n.a.   |
| 4 d |           | 70.79                      | 6.185           | 5.688282497           | 3.324         | n.a.   |



## CG-P2-133-RAC-IA

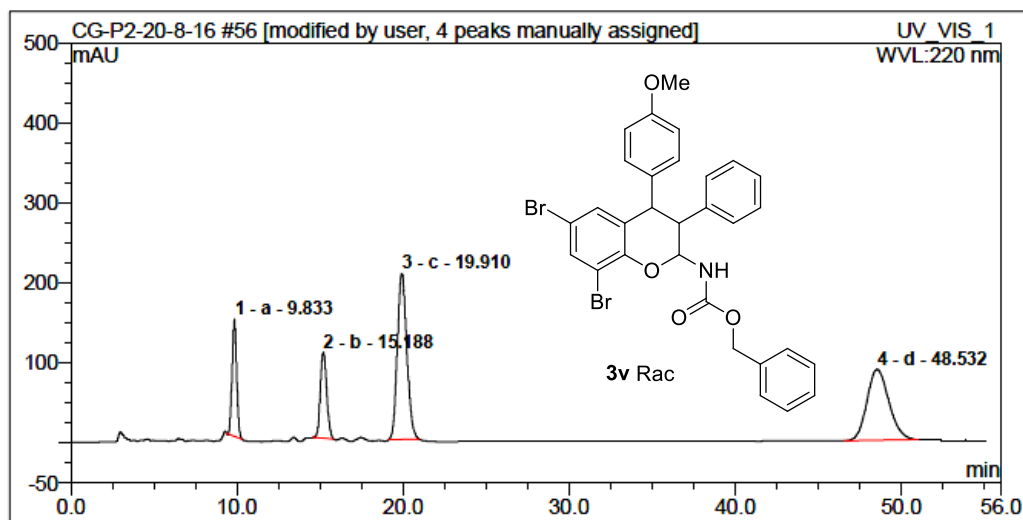

| No. | Peak Name | Ret.Time (detected)<br>min | Area<br>mAU*min | Rel.Area(ident.)<br>% | Height<br>mAU | Amount |
|-----|-----------|----------------------------|-----------------|-----------------------|---------------|--------|
| 1 a |           | 9.83                       | 47.09253        | 12.80056024           | 146.7983      | n.a.   |
| 2 b |           | 15.19                      | 47.7081         | 12.96788443           | 107.5648      | n.a.   |
| 3 c |           | 19.91                      | 136.9508        | 37.2255851            | 207.387       | n.a.   |
| 4 d |           | 48.53                      | 136.143         | 37.00597023           | 88.776        | n.a.   |

## CG-P2-133-CHI-50°C-IA

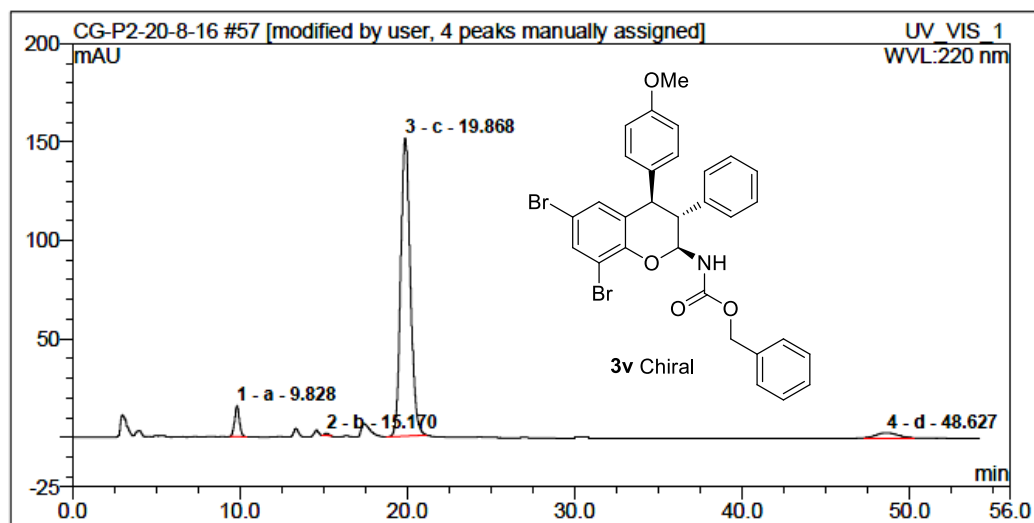

| No. | Peak Name | Ret.Time (detected)<br>min | Area<br>mAU*min | Rel.Area(ident.)<br>% | Height<br>mAU | Amount |
|-----|-----------|----------------------------|-----------------|-----------------------|---------------|--------|
| 1 a |           | 9.83                       | 5.247845        | 4.771339934           | 15.82508      | n.a.   |
| 2 b |           | 15.17                      | 0.337903        | 0.3072211404          | 1.07585       | n.a.   |
| 3 c |           | 19.87                      | 100.6834        | 91.54137965           | 151.467       | n.a.   |
| 4 d |           | 48.63                      | 3.718           | 3.380059279           | 2.608         | n.a.   |

## CG-P2-135-RAC-IC

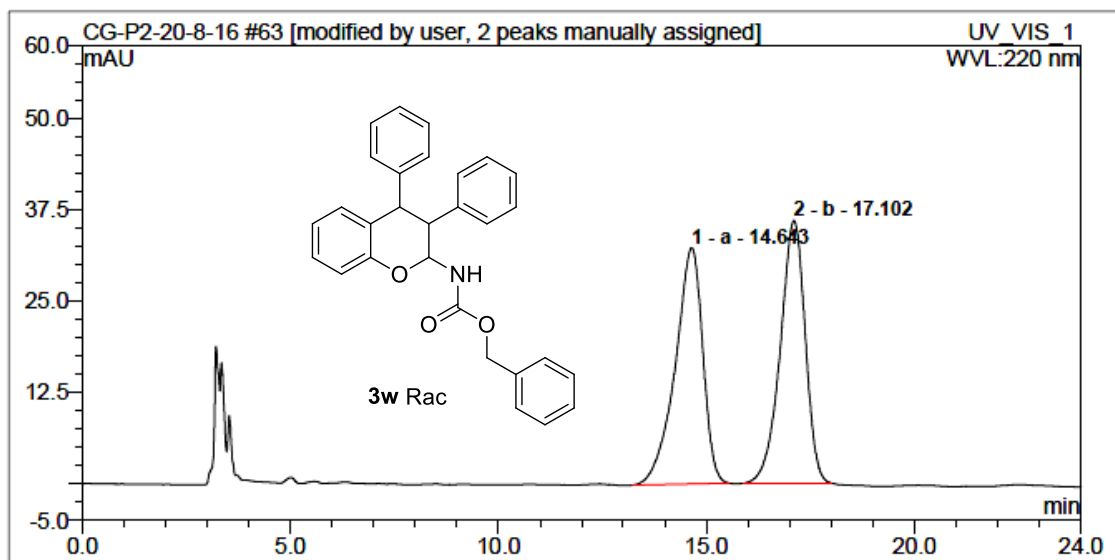

| No. | Peak Name | Ret.Time (detected)<br>min | Area<br>mAU*min | Rel.Area(ident.)<br>% | Height<br>mAU | Amount |
|-----|-----------|----------------------------|-----------------|-----------------------|---------------|--------|
| 1 a |           | 14.64                      | 24.85738        | 49.88748612           | 32.35206      | n.a.   |
| 2 b |           | 17.10                      | 24.970          | 50.11251388           | 35.991        | n.a.   |

## CG-P2-135-CHI-IC

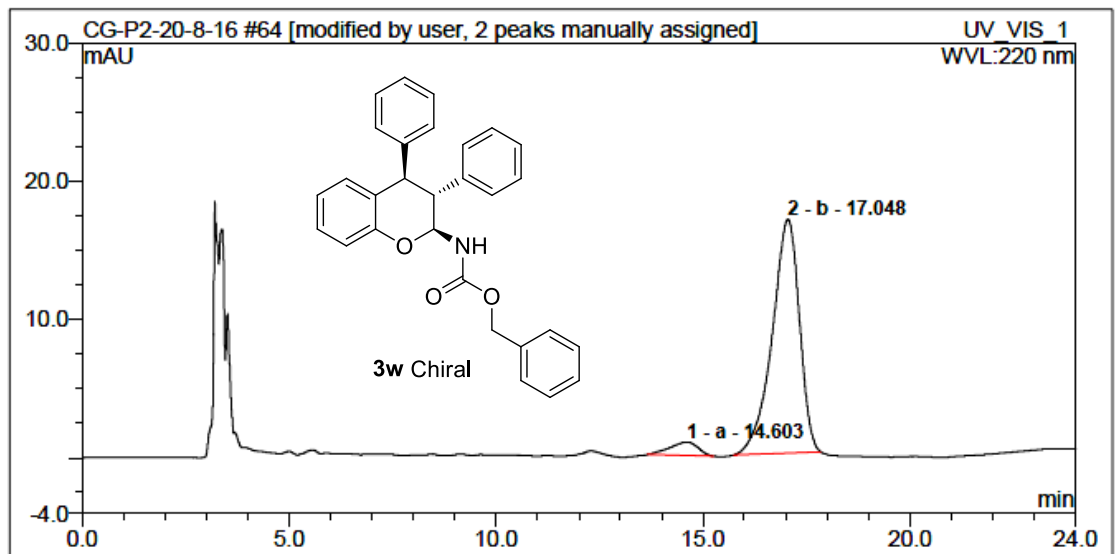

| No. | Peak Name | Ret.Time (detected)<br>min | Area<br>mAU*min | Rel.Area(ident.)<br>% | Height<br>mAU | Amount |
|-----|-----------|----------------------------|-----------------|-----------------------|---------------|--------|
| 1 a |           | 14.60                      | 0.76758         | 5.624082129           | 0.97671       | n.a.   |
| 2 b |           | 17.05                      | 12.881          | 94.37591787           | 16.910        | n.a.   |

## CG-P2-136-RAC-IA

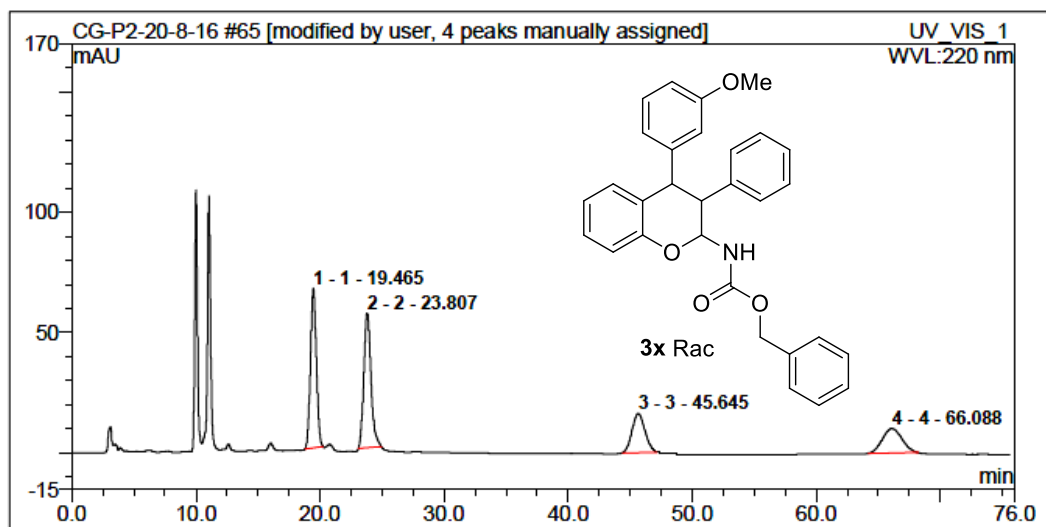

| No. | Peak Name | Ret.Time (detected)<br>min | Area<br>mAU*min | Rel.Area(ident.)<br>% | Height<br>mAU | Amount |
|-----|-----------|----------------------------|-----------------|-----------------------|---------------|--------|
| 1   | 1         | 19.47                      | 36.7884         | 32.77396314           | 66.21447      | n.a.   |
| 2   | 2         | 23.81                      | 37.5221         | 33.42759788           | 55.85455      | n.a.   |
| 3   | 3         | 45.65                      | 19.43095        | 17.31059456           | 16.15091      | n.a.   |
| 4   | 4         | 66.09                      | 18.507          | 16.48784443           | 10.140        | n.a.   |

## CG-P2-136-CHI-IA

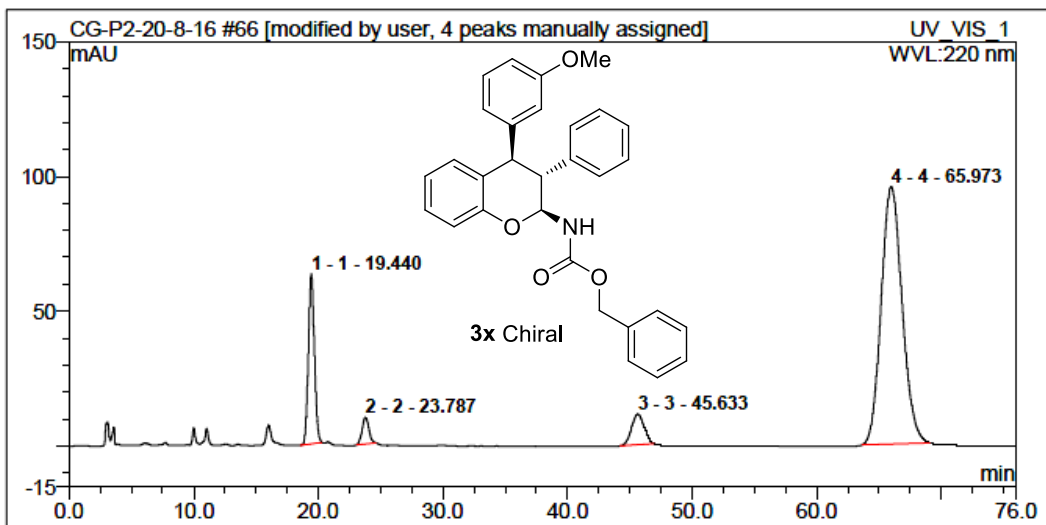

| No. | Peak Name | Ret.Time (detected)<br>min | Area<br>mAU*min | Rel.Area(ident.)<br>% | Height<br>mAU | Amount |
|-----|-----------|----------------------------|-----------------|-----------------------|---------------|--------|
| 1   | 1         | 19.44                      | 35.66993        | 14.81954743           | 63.11569      | n.a.   |
| 2   | 2         | 23.79                      | 6.097993        | 2.533492877           | 9.76617       | n.a.   |
| 3   | 3         | 45.63                      | 13.41393        | 5.572995539           | 11.36742      | n.a.   |
| 4   | 4         | 65.97                      | 185.513         | 77.07396415           | 95.583        | n.a.   |

Ph-AC-CBZ-RAC-ID

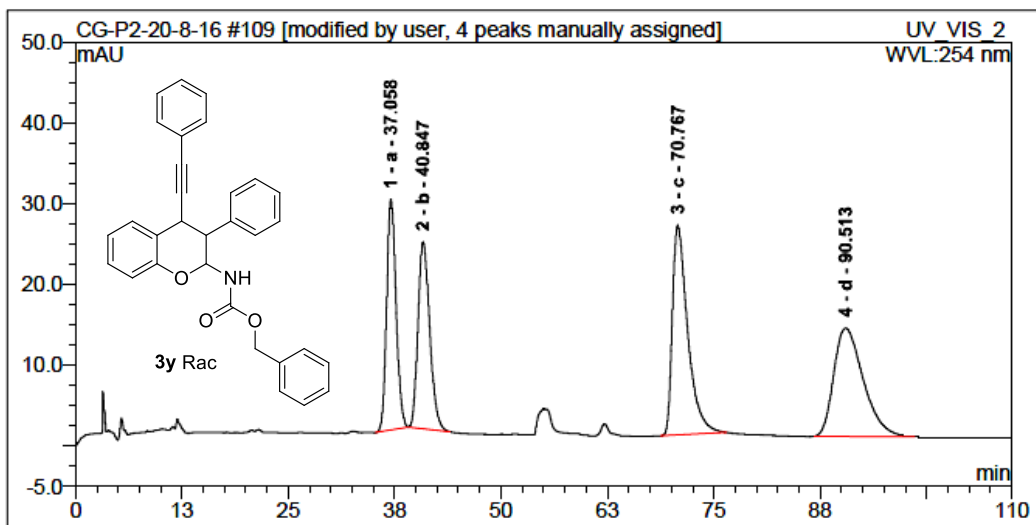

| No. | Peak Name | Ret.Time (detected)<br>min | Area<br>mAU*min | Rel.Area(ident.)<br>% | Height<br>mAU | Amount |
|-----|-----------|----------------------------|-----------------|-----------------------|---------------|--------|
| 1 a |           | 37.06                      | 36.73943        | 20.19240744           | 28.578        | n.a.   |
| 2 b |           | 40.85                      | 36.97069        | 20.31950913           | 23.15838      | n.a.   |
| 3 c |           | 70.77                      | 54.26093        | 29.82242605           | 26.01006      | n.a.   |
| 4 d |           | 90.51                      | 53.976          | 29.66565738           | 13.404        | n.a.   |

Ph-AC-CBZ-CHI-ID

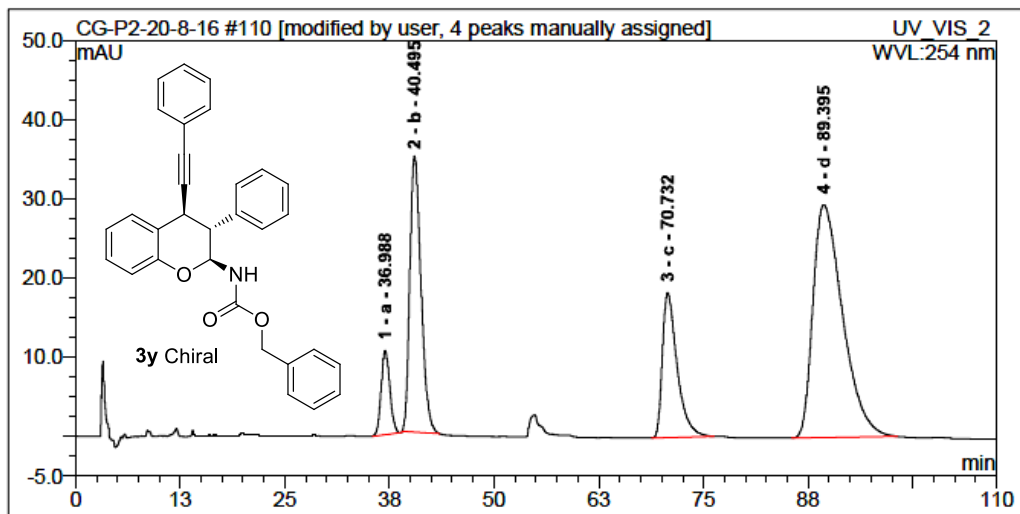

| No. | Peak Name | Ret.Time (detected)<br>min | Area<br>mAU*min | Rel.Area(ident.)<br>% | Height<br>mAU | Amount |
|-----|-----------|----------------------------|-----------------|-----------------------|---------------|--------|
| 1 a |           | 36.99                      | 12.71044        | 5.646231492           | 10.59519      | n.a.   |
| 2 b |           | 40.50                      | 53.77161        | 23.8864242            | 34.9062       | n.a.   |
| 3 c |           | 70.73                      | 37.4655         | 16.64292537           | 18.35106      | n.a.   |
| 4 d |           | 89.40                      | 121.166         | 53.82441893           | 29.424        | n.a.   |

### 13. Determination of absolute stereochemistry for the compound (3q) from Mosher amides:

For the determination of absolute configuration, we initially tried to recrystallize most of the synthesized trisubstituted chroman products. But unfortunately, because of the semisolid nature & for few cases amorphous, high powder nature of the substrate we were unable to get the crystal structure. In this situation, we then focused our attention towards an alternative method for assignment of absolute configuration i.e. Mosher experiment, a procedure for derivatizing and analyzing through the help of  $^1\text{H}$  NMR of an optically active amine. For this purpose, we have chosen the substrate (**3q/3q'**) because conversion into corresponding chiral amine led to no change in configuration at the same time deprotection of Boc group present in this substrate was comparatively easier than Cbz deprotection present in other substrates.

#### Boc group deprotection of substrate (3q):

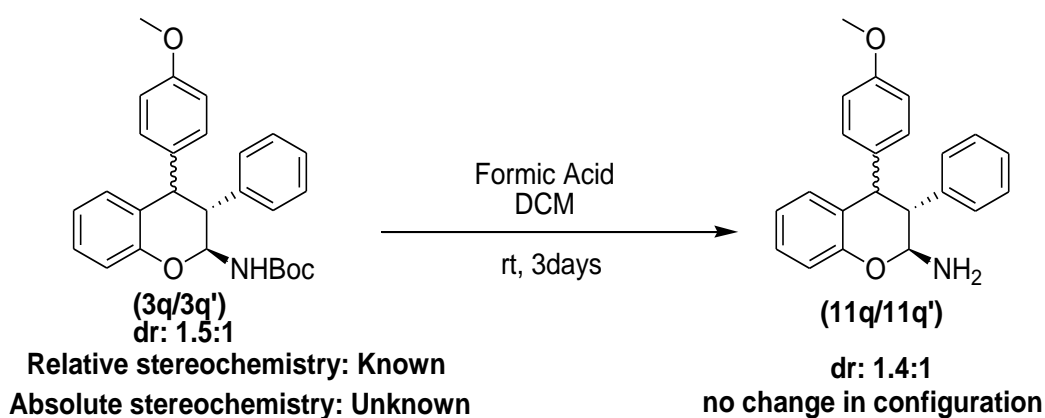

160 mg (0.37 mmol) of (**3q/3q'**) was deprotected to corresponding chiral amine (**11q/11q'**) with 5 ml of 98% formic acid and 1.5 ml dry DCM solvent. The reaction was continued for 3 days. Progress of the reaction was monitored by TLC. Formic acid was evaporated and then 5 ml water was added. pH ~8 was maintained by the addition of  $\text{Na}_2\text{CO}_3$ . Organic phase was extracted with DCM and washed with brine. Finally purified by column chromatography.

#### Preparation of (S)-(+)-MTPA-Cl & compound (13):

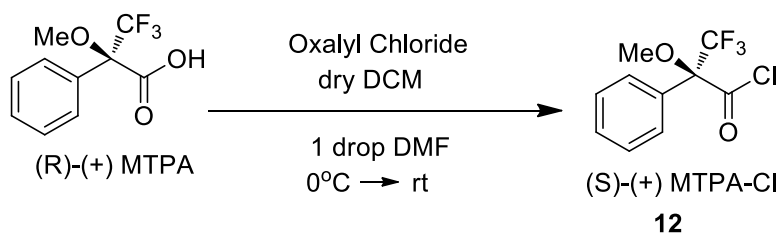

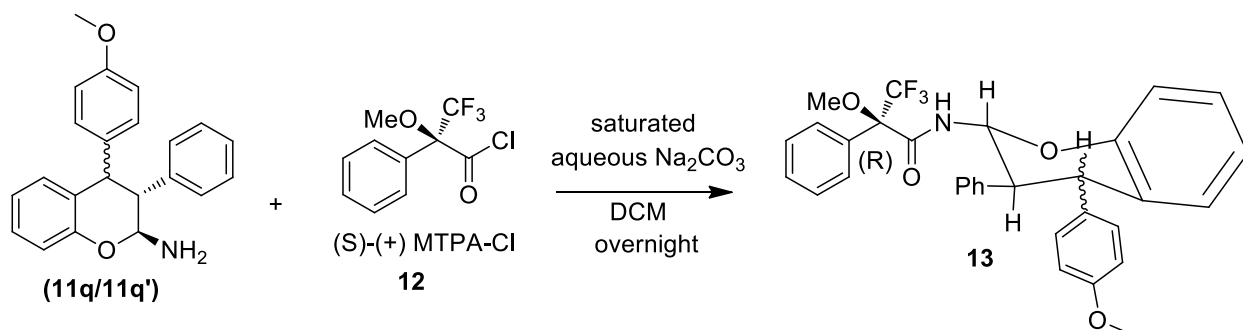

(S)-(+)-MTPA-Cl (**12**) was prepared according to literature procedure.<sup>6</sup> (R)-(+)-MTPA, Mosher's acid (121 mg, 0.52 mmol) was dissolved in 2.4 ml dry DCM and cooled to 0 °C. Then oxalyl chloride (0.5 ml, 5.2 mmol) was added followed by the addition of one drop DMF. Thereafter, the reaction mixture was continued to stir for 1 hour. Progress of the reaction was then monitored by TLC analysis. The reaction mixture was concentrated in *vacuo*. After this, residue was suspended in hexane and concentrated it again in *vacuo*. Finally, product (S)-(+)-MTPA-Cl was dissolved in required amount of dry DCM to prepare 0.21 M solution of corresponding Mosher's acid chloride (**12**).

In the next step (**11q/11q'**) amine (16 mg, 0.048 mmol) was dissolved in 1.2 ml DCM and then previously prepared Mosher's acid chloride (**12**) was added followed by the addition of 1.21 ml saturated aqueous Na<sub>2</sub>CO<sub>3</sub>. The reaction mixture was stirred for overnight. Organic phase was extracted with DCM & concentrated in *vacuo*. Finally purified by column chromatography using (hexane/ EtOAc) as solvent system to afford the desired product (**13**).

#### Preparation of (R)-(-)-MTPA-Cl & compound (15):

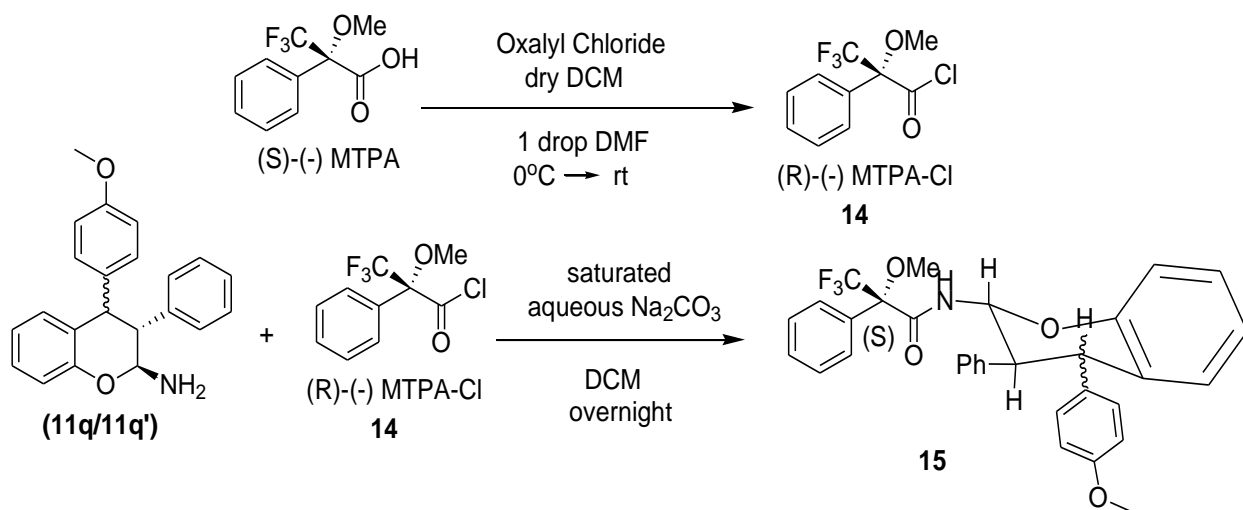

(R)-(-) MTPA-Cl (**14**) was prepared according to literature procedure.<sup>9</sup> (S)-(-) MTPA, Mosher's acid (121 mg, 0.52 mmol) was dissolved in 2.4 ml dry DCM and cooled to 0 °C. Then oxalyl chloride (0.5 ml, 5.2 mmol) was added followed by the addition of one drop DMF. Thereafter, the reaction mixture was continued to stir for 1 hour. Progress of the reaction was then monitored by TLC analysis. The reaction mixture was concentrated in *vacuo*. After this, residue was suspended in hexane and concentrated it again in *vacuo*. Finally, product (R)-(-) MTPA-Cl was dissolved in required amount of dry DCM to prepare 0.21 M solution of corresponding Mosher's acid chloride (**14**).

In the next step (**11q/11q'**) amine (16 mg, 0.048 mmol) was dissolved in 1.2 ml DCM and then previously prepared Mosher's acid chloride (**14**) was added followed by the addition of 1.21 ml saturated aqueous Na<sub>2</sub>CO<sub>3</sub>. The reaction mixture was stirred for overnight. Organic phase was extracted with DCM & concentrated in *vacuo*. Finally purified by column chromatography using (hexane/ EtOAc) as solvent system to afford the desired product (**15**).

**Characterization data for (13):** <sup>1</sup>H NMR (600 MHz, CDCl<sub>3</sub>): δ 7.55 – 7.51 (m, 2H), 7.42 – 7.40 (m, 3H), 7.37 (d, *J* = 6.4 Hz, 2H), 7.21 (t, *J* = 7.2 Hz, 3H), 7.15 (dt, *J* = 15.2, 7.5 Hz, 4H), 7.00 (d, *J* = 2.2 Hz, 1H), 6.99 – 6.95 (m, 4H), 6.94 – 6.91 (m, 3H), 6.90 – 6.86 (m, 2H), 6.81 (t, *J* = 7.5 Hz, 1H), 6.79 (d, *J* = 8.7 Hz, 1H), 6.76 (d, *J* = 8.6 Hz, 2H), 6.74 (d, *J* = 7.6 Hz, 1H), 6.67 (d, *J* = 8.6 Hz, 2H), 6.59 (s, 0.3H), 6.19 (t, *J* = 10.0 Hz, 1H), 6.08 (dd, *J* = 9.9, 3.1 Hz, 0.7H), 4.35 (d, *J* = 11.0 Hz, 1H), 4.31 (d, *J* = 5.0 Hz, 0.7H), 3.75 (s, 1.9H), 3.72 (s, 3H), 3.32 (s, 1.88H), 3.27 (dd, *J* = 4.8, 3.3 Hz, 0.7H), 3.14 (t, *J* = 10.6 Hz, 1H), 2.88 (s, 3H), **HRMS (+ESI):** Calc for C<sub>32</sub>H<sub>29</sub>F<sub>3</sub>NO<sub>4</sub> [M+H]<sup>+</sup> 548.2043; found: 548.2021.

**Characterization data for (15):** <sup>1</sup>H NMR (600 MHz, CDCl<sub>3</sub>): δ 7.48 – 7.44 (m, 1H), 7.37 (d, *J* = 5.3 Hz, 1H), 7.33 (d, *J* = 10.2 Hz, 1H), 7.29 (d, *J* = 7.2 Hz, 1H), 7.24 – 7.21 (m, 2H), 7.20 – 7.17 (m, 2H), 7.15 (d, *J* = 6.9 Hz, 2H), 7.09 (t, *J* = 7.8 Hz, 2H), 7.04 (d, *J* = 8.6 Hz, 1H), 6.98 – 6.94 (m, 4H), 6.93 (d, *J* = 7.2 Hz, 1H), 6.84 – 6.80 (m, 2H), 6.78 (d, *J* = 8.5 Hz, 2H), 6.74 (d, *J* = 7.7 Hz, 3H), 6.67 (d, *J* = 8.5 Hz, 2H), 6.59 (s, 0.4H), 6.20 (t, *J* = 10.1 Hz, 1H), 6.08 (dd, *J* = 9.8, 3.0 Hz, 0.5H), 4.38 (d, *J* = 3.5 Hz, 0.4H), 4.36 (d, *J* = 11.2 Hz, 1H), 3.77 (s, 1.2H), 3.72 (s, 3H), 3.33 (t, *J* = 3.3 Hz, 0.5H), 3.23 (s, 3H), 3.18 (s, 1.5H), 3.15 (d, *J* = 10.7 Hz, 1H); **HRMS (+ESI):** Calc for C<sub>32</sub>H<sub>29</sub>F<sub>3</sub>NO<sub>4</sub> [M+H]<sup>+</sup> 548.2043; found: 548.2036.

**<sup>1</sup>H NMR spectra of (13):**

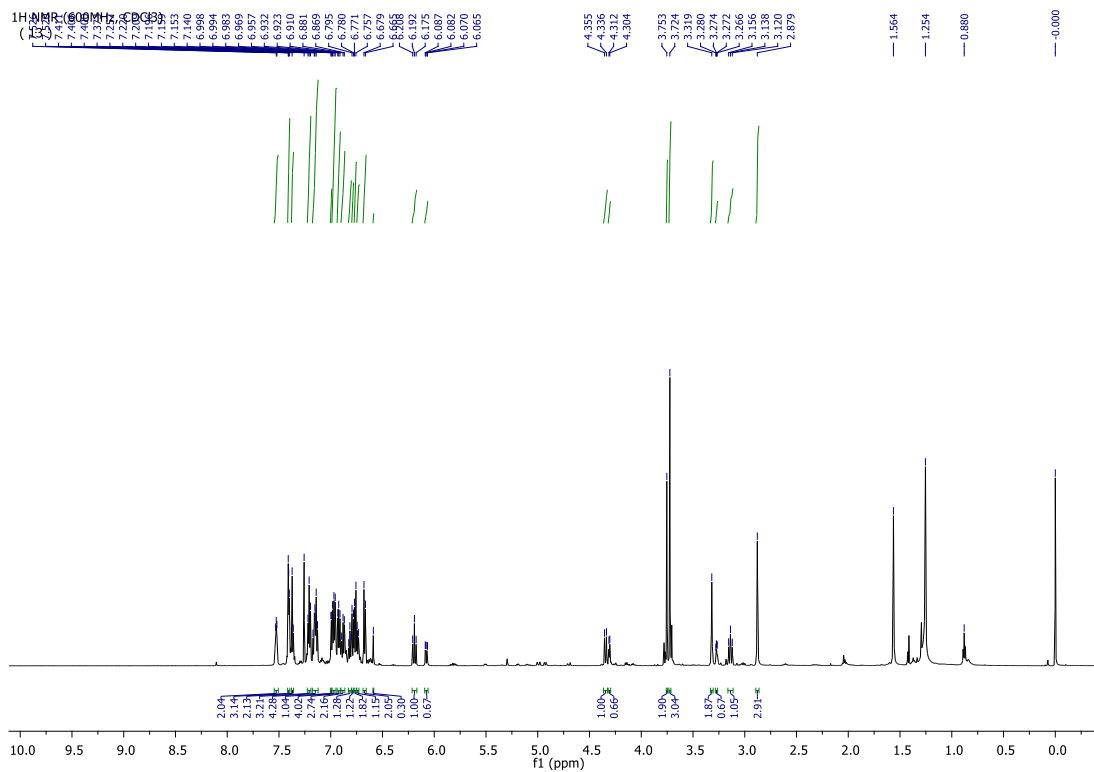

**<sup>1</sup>H NMR spectra of (15):**

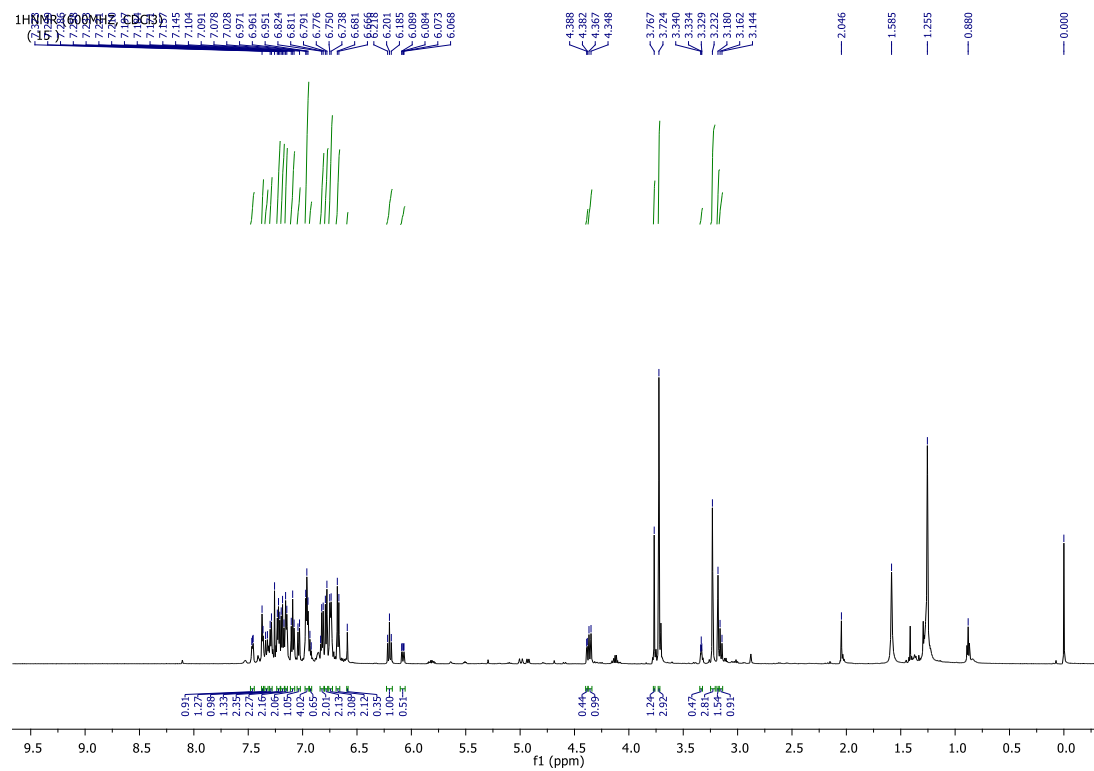



**COSY spectra of (13):**

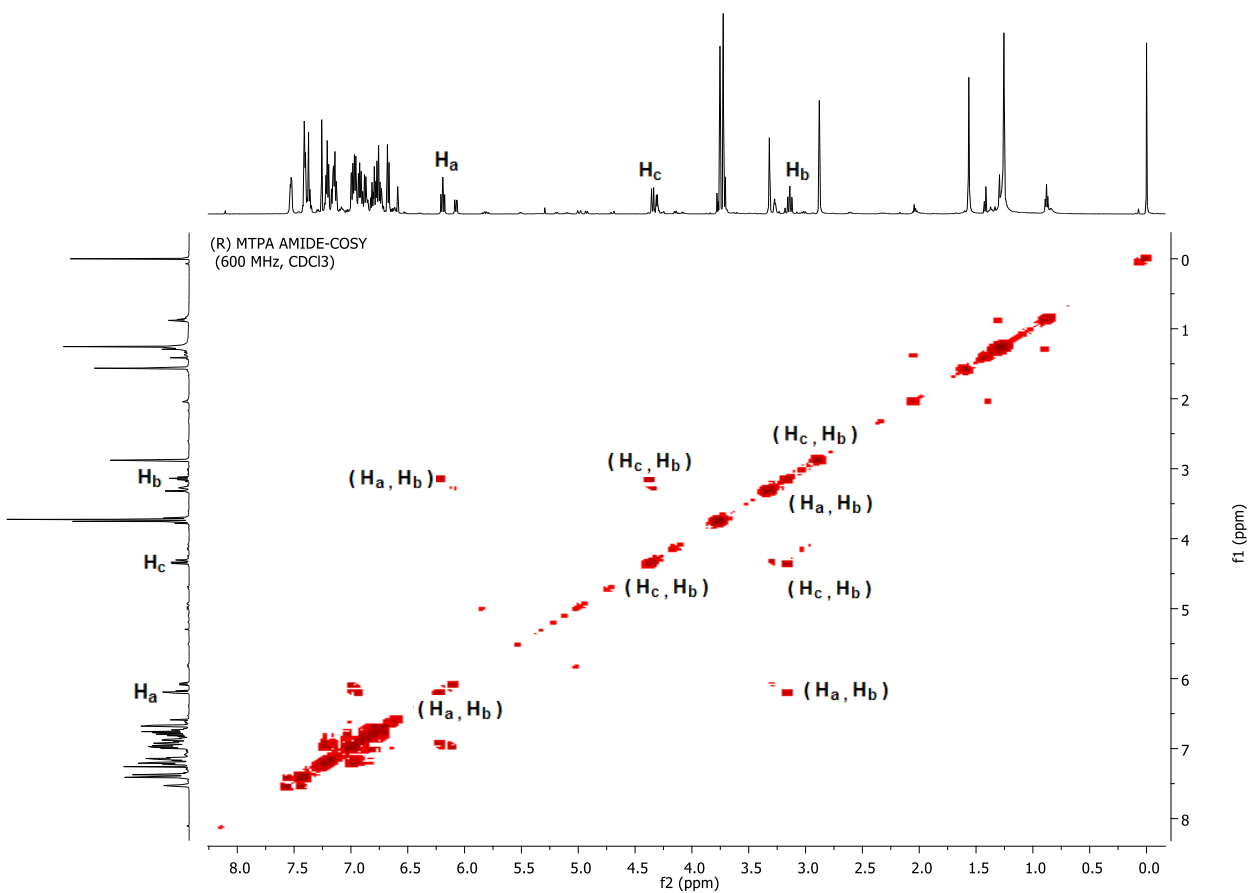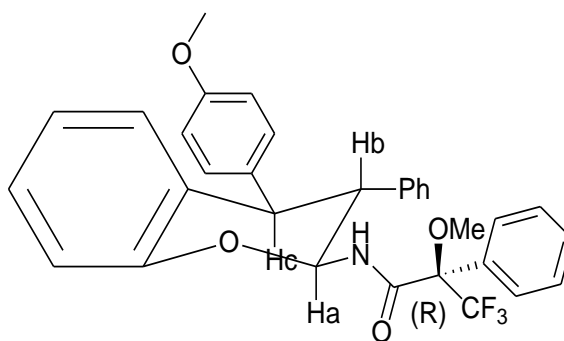

**COSY spectra of (15):**

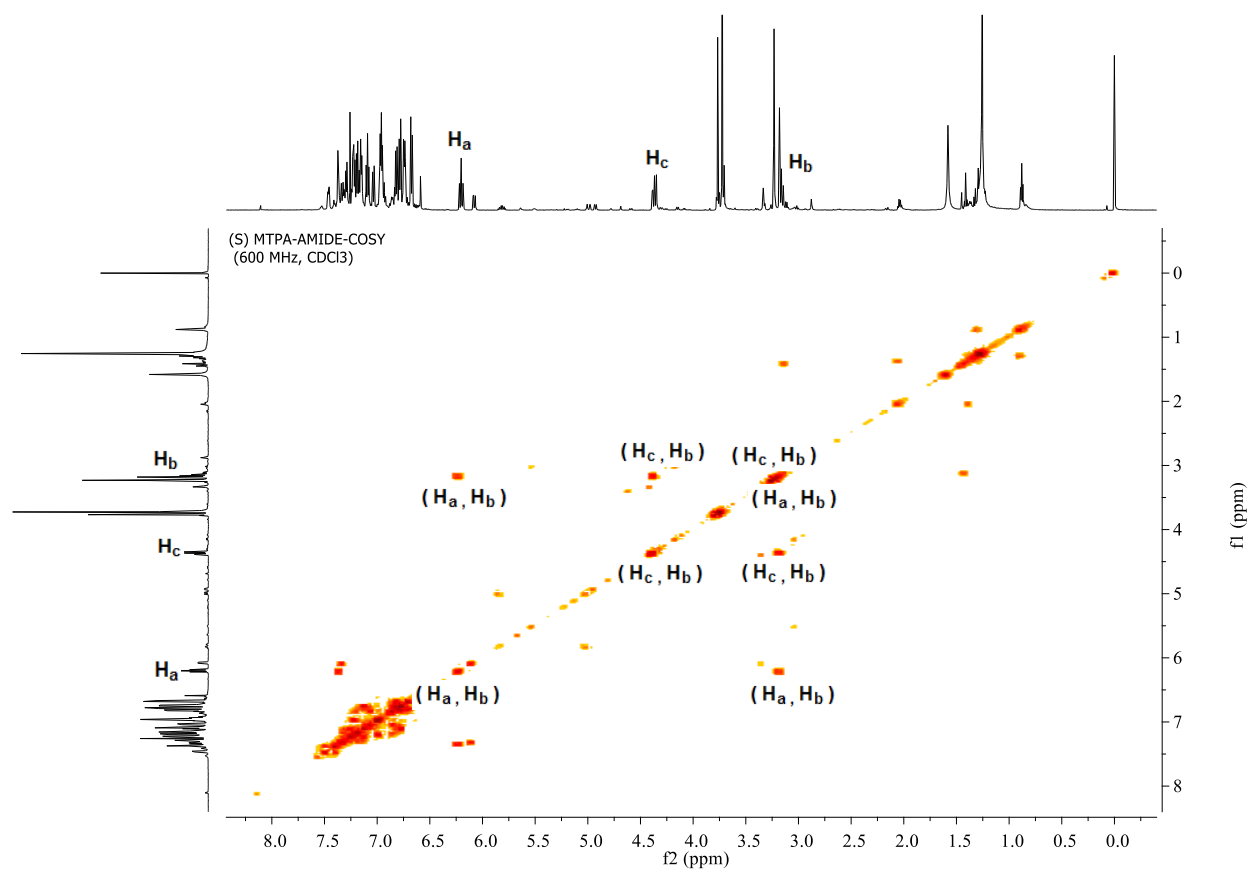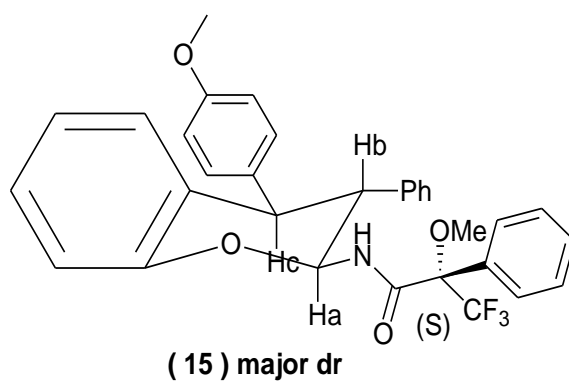

### Analysis for the absolute configuration of the major diastereomer of the substrate (3q /3q'):

From the Mosher's methodology,<sup>9,10</sup> it is known that, in the most stable conformation of the MTPA amide, the trifluoromethyl group is always *syn* periplanar with respect to carbonyl group. Furthermore, N-H bond and the carbonyl group prefers *anti* orientation amongst themselves from energy point of view.

Accordingly, we envisioned the molecular models of our trisubstituted chroman moiety. Analysis of **(13)** & **(15)** reveals that H<sub>a</sub>, H<sub>b</sub>, H<sub>c</sub> protons of the major dr are shielded in MTPA-amide **(13)** compared to MTPA-amide **(15)**. This clearly indicates that shielding interaction is present between the phenyl group of the Mosher part and the three adjacent protons. Thus, it can be predicted that the phenyl group adjacent to H<sub>b</sub> must be coplanar with the phenyl group of Mosher part. Also, for our concerted mechanism, H<sub>a</sub> and H<sub>b</sub> must be *trans* to each other as dienophile enecarbamates are in *trans* conformation. In addition, coupling constant value & NOESY, COSY analysis (for compound **(3a/3a')**) revealed that H<sub>b</sub> and H<sub>c</sub> are also *trans* to each other for the major diastereomer as shown in page no-S.17 & page no- S.96 to S.97.

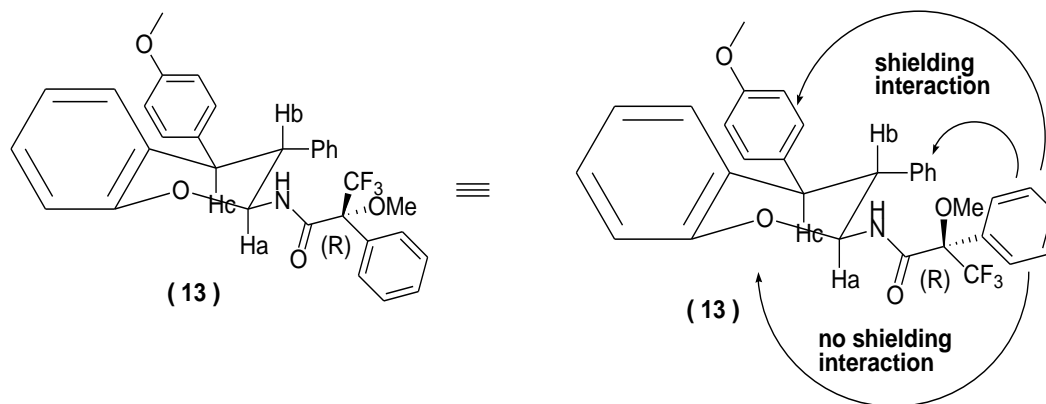

|                      |                                                     |          |
|----------------------|-----------------------------------------------------|----------|
|                      | H <sub>a</sub> : δ 6.19 (t, <i>J</i> = 10.0 Hz, 1H) | shielded |
| Compound <b>(13)</b> | H <sub>b</sub> : δ 3.14 (t, <i>J</i> = 10.6 Hz, 1H) | shielded |
|                      | H <sub>c</sub> : δ 4.35 (d, <i>J</i> = 11.0 Hz, 1H) | shielded |

9) D. J. Fox, S. Parris, D. S. Pedersen, C. R. Tyzack and S. Warren, *Org. Biomol. Chem.*, 2006, **4**, 3108; 10) J. M. Seco, E. Quinoa and R. Riguera, *Chem. Rev.*, 2004, **104**, 17.

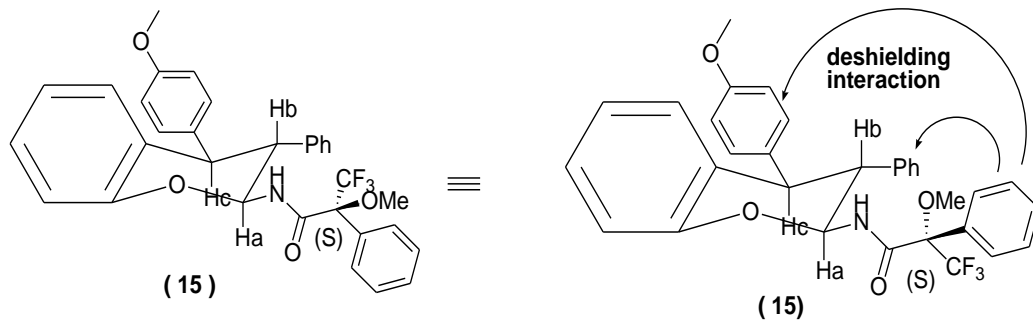

|               |                                                       |            |
|---------------|-------------------------------------------------------|------------|
|               | H <sub>a</sub> : $\delta$ 6.20 (t, $J$ = 10.1 Hz, 1H) | deshielded |
| Compound (15) | H <sub>b</sub> : $\delta$ 3.15 (d, $J$ = 10.7 Hz, 1H) | deshielded |
|               | H <sub>c</sub> : $\delta$ 4.36 (d, $J$ = 11.2 Hz, 1H) | deshielded |

Thus, the absolute configuration for the major diastereomer of compound (3q) was determined as

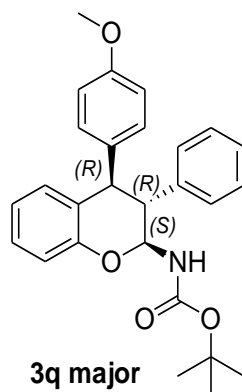

Supplement: c7ob01766a1.pdf [file c7ob01766a1.pdf]
